# Supplementary material for: Transcriptome-metabolome integration reveals MYB/WRKY-RGA network and phenylalanine metabolism in potato late blight resistance
Source: Research Square preprint supplement (doi:10.21203/rs.3.rs-8142072/v1), 2025-12-04
Supplement: Supplementary file 1 [file 47b943b88f3ccb005fb680dd.xlsx]

## Sheet: Sheet1
Supplementary Table S3 Significantly correlated DEGs-TF pairs in core-DEGs
TF	RGA	Pearson correlation coefficient	P-value	Q-value
Soltu.DM.01G008020	Soltu.DM.01G032810	0.901618	1.81613e-09	4.26824e-08
Soltu.DM.01G008020	Soltu.DM.01G047000	0.925216	9.94708e-11	3.73522e-09
Soltu.DM.01G008020	Soltu.DM.02G015770	0.914327	4.21354e-10	1.23397e-08
Soltu.DM.01G008020	Soltu.DM.03G004240	0.900099	2.13374e-09	4.83735e-08
Soltu.DM.01G008020	Soltu.DM.03G009170	0.918831	2.37657e-10	7.60422e-09
Soltu.DM.01G008020	Soltu.DM.03G009770	0.920344	1.94639e-10	6.44981e-09
Soltu.DM.01G008020	Soltu.DM.03G026240	0.910328	6.82907e-10	1.878e-08
Soltu.DM.01G008020	Soltu.DM.09G010080	0.905602	1.17472e-09	2.99562e-08
Soltu.DM.01G008020	Soltu.DM.03G025430	0.924933	1.03557e-10	3.84256e-09
Soltu.DM.01G008020	Soltu.DM.03G025440	0.93222	3.48588e-11	1.56528e-09
Soltu.DM.01G008020	Soltu.DM.03G025470	0.902796	1.59965e-09	3.862e-08
Soltu.DM.01G008020	Soltu.DM.04G022680	0.939984	9.48461e-12	5.45879e-10
Soltu.DM.01G008020	Soltu.DM.05G013210	0.919451	2.19081e-10	7.14511e-09
Soltu.DM.01G032720	Soltu.DM.01G034010	0.904314	1.35506e-09	3.36773e-08
Soltu.DM.01G032720	Soltu.DM.02G001690	0.905117	1.2399e-09	3.1403e-08
Soltu.DM.01G041550	Soltu.DM.04G005570	0.909177	7.81441e-10	2.09322e-08
Soltu.DM.01G041550	Soltu.DM.01G041520	0.908439	8.51219e-10	2.25731e-08
Soltu.DM.01G041550	Soltu.DM.01G047000	0.920362	1.94173e-10	6.44586e-09
Soltu.DM.01G041550	Soltu.DM.03G026240	0.927115	7.56388e-11	2.94785e-09
Soltu.DM.01G041550	Soltu.DM.09G001890	0.929312	5.45802e-11	2.27499e-09
Soltu.DM.01G041550	Soltu.DM.12G005780	0.924118	1.16165e-10	4.22606e-09
Soltu.DM.01G041550	Soltu.DM.03G025430	0.900681	2.00658e-09	4.61662e-08
Soltu.DM.01G041550	Soltu.DM.04G000770	0.924312	1.13054e-10	4.13714e-09
Soltu.DM.01G041550	Soltu.DM.05G013210	0.903161	1.53756e-09	3.74617e-08
Soltu.DM.01G041550	Soltu.DM.08G027040	0.935728	1.97535e-11	9.84498e-10
Soltu.DM.01G043800	Soltu.DM.01G045800	0.914201	4.27978e-10	1.249e-08
Soltu.DM.01G043800	Soltu.DM.02G019240	0.938209	1.29614e-11	7.00444e-10
Soltu.DM.01G043800	Soltu.DM.03G012000	0.921524	1.66088e-10	5.64456e-09
Soltu.DM.01G043800	Soltu.DM.03G022680	0.937986	1.34712e-11	7.21697e-10
Soltu.DM.01G043800	Soltu.DM.05G004640	0.900622	2.01916e-09	4.63982e-08
Soltu.DM.01G043800	Soltu.DM.11G001180	0.900178	2.11624e-09	4.81433e-08
Soltu.DM.01G043800	Soltu.DM.01G037650	0.958283	1.89146e-13	2.37583e-11
Soltu.DM.01G043800	Soltu.DM.07G014090	0.940062	9.35337e-12	5.39997e-10
Soltu.DM.01G045340	Soltu.DM.02G019190	0.901097	1.91983e-09	4.45562e-08
Soltu.DM.01G045340	Soltu.DM.12G027420	0.92144	1.67984e-10	5.6882e-09
Soltu.DM.01G046560	Soltu.DM.01G002130	0.94716	2.41717e-12	1.8723e-10
Soltu.DM.01G046560	Soltu.DM.01G003440	0.901535	1.83224e-09	4.30068e-08
Soltu.DM.01G046560	Soltu.DM.01G045800	0.909731	7.32501e-10	1.99373e-08
Soltu.DM.01G046560	Soltu.DM.02G033170	0.939933	9.57092e-12	5.46876e-10
Soltu.DM.01G046560	Soltu.DM.03G022970	0.904458	1.33375e-09	3.32364e-08
Soltu.DM.01G046560	Soltu.DM.10G002080	0.939862	9.69315e-12	5.46876e-10
Soltu.DM.01G047820	Soltu.DM.02G019240	0.919374	2.21327e-10	7.19313e-09
Soltu.DM.01G047820	Soltu.DM.05G004640	0.911584	5.88234e-10	1.65686e-08
Soltu.DM.01G047820	Soltu.DM.07G018570	0.902395	1.67059e-09	4.00727e-08
Soltu.DM.01G047820	Soltu.DM.11G001180	0.95852	1.77839e-13	2.2644e-11
Soltu.DM.01G047820	Soltu.DM.01G037650	0.928184	6.46164e-11	2.60004e-09
Soltu.DM.01G048710	Soltu.DM.01G022390	0.966089	2.00844e-14	4.05836e-12
Soltu.DM.01G048710	Soltu.DM.01G031880	0.900522	2.04058e-09	4.67748e-08
Soltu.DM.01G048710	Soltu.DM.01G032810	0.938151	1.30921e-11	7.05454e-10
Soltu.DM.01G048710	Soltu.DM.01G040860	0.909412	7.60316e-10	2.0544e-08
Soltu.DM.01G048710	Soltu.DM.02G010760	0.959348	1.43003e-13	1.9264e-11
Soltu.DM.01G048710	Soltu.DM.04G009040	-0.914376	4.18852e-10	1.23009e-08
Soltu.DM.01G048710	Soltu.DM.08G028670	0.959727	1.29234e-13	1.76652e-11
Soltu.DM.01G048710	Soltu.DM.09G031500	0.924792	1.05653e-10	3.897e-09
Soltu.DM.01G048710	Soltu.DM.03G001330	0.921824	1.5947e-10	5.44955e-09
Soltu.DM.01G048710	Soltu.DM.11G002410	0.937031	1.58654e-11	8.14746e-10
Soltu.DM.01G048710	Soltu.DM.03G022810	0.949467	1.49537e-12	1.29297e-10
Soltu.DM.01G048710	Soltu.DM.03G025330	0.930225	4.75154e-11	2.03998e-09
Soltu.DM.01G048710	Soltu.DM.03G025470	0.908725	8.2346e-10	2.19629e-08
Soltu.DM.01G048710	Soltu.DM.04G022860	0.968933	7.76577e-15	2.00939e-12
Soltu.DM.01G048710	Soltu.DM.04G035960	0.947477	2.266e-12	1.77743e-10
Soltu.DM.01G048710	Soltu.DM.09G002710	0.939899	9.63023e-12	5.46876e-10
Soltu.DM.01G048710	Soltu.DM.10G025490	-0.915495	3.64353e-10	1.08547e-08
Soltu.DM.01G048710	Soltu.DM.11G007260	0.900351	2.07796e-09	4.74561e-08
Soltu.DM.01G048710	Soltu.DM.11G007270	0.931451	3.93228e-11	1.73383e-09
Soltu.DM.01G048710	Soltu.DM.11G007280	0.941007	7.88827e-12	4.74572e-10
Soltu.DM.01G049480	Soltu.DM.08G015940	0.926897	7.80905e-11	3.03703e-09
Soltu.DM.01G049480	Soltu.DM.01G031880	0.918935	2.34469e-10	7.52812e-09
Soltu.DM.01G049480	Soltu.DM.01G047000	0.908133	8.817e-10	2.32824e-08
Soltu.DM.01G049480	Soltu.DM.02G015770	0.935582	2.02391e-11	1.006e-09
Soltu.DM.01G049480	Soltu.DM.03G005050	0.935447	2.06955e-11	1.0205e-09
Soltu.DM.01G049480	Soltu.DM.03G009170	0.927508	7.14104e-11	2.82749e-09
Soltu.DM.01G049480	Soltu.DM.09G010080	0.936618	1.70147e-11	8.68967e-10
Soltu.DM.02G004200	Soltu.DM.01G003440	0.942769	5.69838e-12	3.68411e-10
Soltu.DM.02G004200	Soltu.DM.03G022970	0.963401	4.58997e-14	7.89564e-12
Soltu.DM.02G004200	Soltu.DM.03G025950	0.925087	1.0132e-10	3.7822e-09
Soltu.DM.02G004200	Soltu.DM.06G025730	0.938125	1.31511e-11	7.06587e-10
Soltu.DM.02G004200	Soltu.DM.02G018220	0.917626	2.77896e-10	8.6534e-09
Soltu.DM.02G008050	Soltu.DM.01G003440	0.905203	1.22815e-09	3.1211e-08
Soltu.DM.02G008050	Soltu.DM.02G018220	0.926044	8.83557e-11	3.37276e-09
Soltu.DM.02G008050	Soltu.DM.07G014090	0.931092	4.15765e-11	1.81009e-09
Soltu.DM.02G008050	Soltu.DM.08G014180	0.969162	7.16691e-15	1.93091e-12
Soltu.DM.02G008840	Soltu.DM.01G041460	0.917633	2.77661e-10	8.6534e-09
Soltu.DM.02G008840	Soltu.DM.02G019240	0.94276	5.7075e-12	3.68411e-10
Soltu.DM.02G008840	Soltu.DM.05G004640	0.931525	3.88738e-11	1.72063e-09
Soltu.DM.02G008840	Soltu.DM.07G005240	0.914464	4.14279e-10	1.22051e-08
Soltu.DM.02G008840	Soltu.DM.07G018570	0.912331	5.37708e-10	1.52614e-08
Soltu.DM.02G008840	Soltu.DM.01G037650	0.903102	1.54734e-09	3.76014e-08
Soltu.DM.02G020430	Soltu.DM.01G002130	0.939884	9.65537e-12	5.46876e-10
Soltu.DM.02G020430	Soltu.DM.01G003440	0.926589	8.16648e-11	3.16941e-09
Soltu.DM.02G020430	Soltu.DM.01G045800	0.970731	4.06482e-15	1.21879e-12
Soltu.DM.02G020430	Soltu.DM.02G019240	0.934147	2.56151e-11	1.21538e-09
Soltu.DM.02G020430	Soltu.DM.02G033170	0.951972	8.64824e-13	8.03854e-11
Soltu.DM.02G020430	Soltu.DM.10G002080	0.972469	2.08966e-15	6.81522e-13
Soltu.DM.02G020430	Soltu.DM.07G014090	0.961024	9.07123e-14	1.3365e-11
Soltu.DM.02G022610	Soltu.DM.01G022390	0.969051	7.4509e-15	1.97875e-12
Soltu.DM.02G022610	Soltu.DM.01G031880	0.913408	4.71794e-10	1.35769e-08
Soltu.DM.02G022610	Soltu.DM.01G032810	0.927548	7.09815e-11	2.8208e-09
Soltu.DM.02G022610	Soltu.DM.02G010760	0.9575	2.31216e-13	2.80935e-11
Soltu.DM.02G022610	Soltu.DM.04G009040	-0.90504	1.25057e-09	3.163e-08
Soltu.DM.02G022610	Soltu.DM.05G025250	0.919411	2.20243e-10	7.17042e-09
Soltu.DM.02G022610	Soltu.DM.08G028670	0.927926	6.71387e-11	2.67986e-09
Soltu.DM.02G022610	Soltu.DM.09G031500	0.916952	3.02997e-10	9.3257e-09
Soltu.DM.02G022610	Soltu.DM.03G001330	0.948886	1.69128e-12	1.44889e-10
Soltu.DM.02G022610	Soltu.DM.11G002410	0.94174	6.89837e-12	4.27469e-10
Soltu.DM.02G022610	Soltu.DM.03G022810	0.906321	1.08361e-09	2.78236e-08
Soltu.DM.02G022610	Soltu.DM.03G025330	0.950323	1.24412e-12	1.11717e-10
Soltu.DM.02G022610	Soltu.DM.03G025470	0.926115	8.74563e-11	3.34529e-09
Soltu.DM.02G022610	Soltu.DM.04G022860	0.972855	1.79189e-15	6.384e-13
Soltu.DM.02G022610	Soltu.DM.09G002710	0.917433	2.84886e-10	8.84145e-09
Soltu.DM.02G022610	Soltu.DM.10G025490	-0.91075	6.49627e-10	1.80517e-08
Soltu.DM.02G022610	Soltu.DM.11G007260	0.938958	1.13738e-11	6.31158e-10
Soltu.DM.02G022610	Soltu.DM.11G007270	0.92994	4.9624e-11	2.10619e-09
Soltu.DM.02G022610	Soltu.DM.11G007280	0.94105	7.82674e-12	4.72399e-10
Soltu.DM.02G024270	Soltu.DM.08G015940	0.922131	1.52929e-10	5.26473e-09
Soltu.DM.02G024270	Soltu.DM.01G031880	0.946536	2.74221e-12	2.03911e-10
Soltu.DM.02G024270	Soltu.DM.01G032810	0.925978	8.9204e-11	3.39816e-09
Soltu.DM.02G024270	Soltu.DM.01G047000	0.958777	1.66306e-13	2.18648e-11
Soltu.DM.02G024270	Soltu.DM.02G015770	0.946622	2.69531e-12	2.01228e-10
Soltu.DM.02G024270	Soltu.DM.03G004240	0.918157	2.59468e-10	8.1616e-09
Soltu.DM.02G024270	Soltu.DM.03G005050	0.946807	2.59668e-12	1.96228e-10
Soltu.DM.02G024270	Soltu.DM.03G009170	0.986267	1.05944e-18	1.79046e-15
Soltu.DM.02G024270	Soltu.DM.03G026240	0.920276	1.96389e-10	6.49622e-09
Soltu.DM.02G024270	Soltu.DM.05G025250	0.928583	6.0889e-11	2.47847e-09
Soltu.DM.02G024270	Soltu.DM.09G010080	0.945789	3.18355e-12	2.28503e-10
Soltu.DM.02G024270	Soltu.DM.09G031500	0.916628	3.15747e-10	9.62159e-09
Soltu.DM.02G024270	Soltu.DM.03G025330	0.909351	7.65764e-10	2.06596e-08
Soltu.DM.02G024270	Soltu.DM.03G025430	0.96346	4.51085e-14	7.89564e-12
Soltu.DM.02G024270	Soltu.DM.03G025440	0.966709	1.64434e-14	3.47366e-12
Soltu.DM.02G024270	Soltu.DM.03G025470	0.95464	4.67038e-13	4.82346e-11
Soltu.DM.02G024270	Soltu.DM.04G022680	0.973254	1.5253e-15	5.78681e-13
Soltu.DM.02G024270	Soltu.DM.05G013210	0.917845	2.70144e-10	8.48306e-09
Soltu.DM.02G024270	Soltu.DM.11G007270	0.917275	2.90729e-10	9.00775e-09
Soltu.DM.02G028310	Soltu.DM.01G041460	0.922206	1.51368e-10	5.22064e-09
Soltu.DM.02G028310	Soltu.DM.01G045800	0.916285	3.29823e-10	9.92419e-09
Soltu.DM.02G028310	Soltu.DM.02G019240	0.93183	3.70628e-11	1.65624e-09
Soltu.DM.02G028310	Soltu.DM.03G012000	0.947681	2.17315e-12	1.72211e-10
Soltu.DM.02G028310	Soltu.DM.05G004640	0.928523	6.1441e-11	2.49386e-09
Soltu.DM.02G028310	Soltu.DM.09G025640	0.914325	4.21501e-10	1.23397e-08
Soltu.DM.02G028310	Soltu.DM.01G037650	0.944531	4.07286e-12	2.80424e-10
Soltu.DM.02G028310	Soltu.DM.07G014090	0.931637	3.81982e-11	1.69882e-09
Soltu.DM.02G028310	Soltu.DM.08G014180	0.909337	7.66986e-10	2.06596e-08
Soltu.DM.02G031400	Soltu.DM.03G026240	0.937304	1.5145e-11	7.88643e-10
Soltu.DM.02G031830	Soltu.DM.01G032810	0.917562	2.80202e-10	8.71064e-09
Soltu.DM.02G031830	Soltu.DM.03G004240	0.926511	8.25915e-11	3.1987e-09
Soltu.DM.02G031830	Soltu.DM.11G026060	0.901804	1.78027e-09	4.19989e-08
Soltu.DM.02G031830	Soltu.DM.03G025470	0.935993	1.89005e-11	9.49621e-10
Soltu.DM.02G031830	Soltu.DM.04G022680	0.900168	2.11841e-09	4.81433e-08
Soltu.DM.02G034320	Soltu.DM.06G025730	0.919327	2.22699e-10	7.2125e-09
Soltu.DM.02G034320	Soltu.DM.02G018220	0.913271	4.79761e-10	1.37635e-08
Soltu.DM.02G034390	Soltu.DM.01G032810	0.90174	1.7924e-09	4.22316e-08
Soltu.DM.02G034390	Soltu.DM.03G025330	0.922369	1.48042e-10	5.13471e-09
Soltu.DM.02G034390	Soltu.DM.03G025470	0.907403	9.58594e-10	2.50637e-08
Soltu.DM.03G001930	Soltu.DM.06G009380	0.900195	2.11232e-09	4.81226e-08
Soltu.DM.03G005770	Soltu.DM.01G002130	0.932182	3.50704e-11	1.57098e-09
Soltu.DM.03G005770	Soltu.DM.01G045800	0.948517	1.8272e-12	1.54398e-10
Soltu.DM.03G005770	Soltu.DM.02G019240	0.928589	6.08344e-11	2.47847e-09
Soltu.DM.03G005770	Soltu.DM.03G012000	0.917251	2.9162e-10	9.02032e-09
Soltu.DM.03G005770	Soltu.DM.07G005240	0.941836	6.77803e-12	4.22831e-10
Soltu.DM.03G005770	Soltu.DM.07G018570	0.909486	7.53799e-10	2.04273e-08
Soltu.DM.03G005770	Soltu.DM.07G023160	0.937558	1.44995e-11	7.65754e-10
Soltu.DM.03G005770	Soltu.DM.01G037650	0.916616	3.16234e-10	9.62159e-09
Soltu.DM.03G005770	Soltu.DM.07G014090	0.937715	1.41145e-11	7.5183e-10
Soltu.DM.03G007360	Soltu.DM.01G040860	0.902954	1.57246e-09	3.81121e-08
Soltu.DM.03G007360	Soltu.DM.09G002710	0.922028	1.55088e-10	5.32919e-09
Soltu.DM.03G007360	Soltu.DM.11G007280	0.921048	1.7711e-10	5.95385e-09
Soltu.DM.03G010890	Soltu.DM.01G031880	0.90523	1.22448e-09	3.11824e-08
Soltu.DM.03G010890	Soltu.DM.01G047000	0.934576	2.38844e-11	1.14436e-09
Soltu.DM.03G010890	Soltu.DM.02G015770	0.950479	1.20273e-12	1.09067e-10
Soltu.DM.03G010890	Soltu.DM.03G005050	0.93345	2.86674e-11	1.32569e-09
Soltu.DM.03G010890	Soltu.DM.03G009170	0.946957	2.51904e-12	1.92712e-10
Soltu.DM.03G010890	Soltu.DM.03G026240	0.929182	5.56614e-11	2.31487e-09
Soltu.DM.03G010890	Soltu.DM.09G010080	0.919335	2.22453e-10	7.2125e-09
Soltu.DM.03G010890	Soltu.DM.03G025430	0.947972	2.04665e-12	1.66874e-10
Soltu.DM.03G010890	Soltu.DM.03G025440	0.963372	4.6295e-14	7.89564e-12
Soltu.DM.03G010890	Soltu.DM.03G025470	0.901805	1.77993e-09	4.19989e-08
Soltu.DM.03G010890	Soltu.DM.04G022680	0.962553	5.88186e-14	9.42619e-12
Soltu.DM.03G010890	Soltu.DM.05G013210	0.928438	6.22203e-11	2.51999e-09
Soltu.DM.03G013210	Soltu.DM.08G015940	0.931345	3.99775e-11	1.75279e-09
Soltu.DM.03G013210	Soltu.DM.01G031880	0.924572	1.08989e-10	4.00417e-09
Soltu.DM.03G013210	Soltu.DM.01G047000	0.943604	4.86695e-12	3.25455e-10
Soltu.DM.03G013210	Soltu.DM.02G015770	0.946289	2.88203e-12	2.10426e-10
Soltu.DM.03G013210	Soltu.DM.03G005050	0.94812	1.98451e-12	1.63239e-10
Soltu.DM.03G013210	Soltu.DM.03G009170	0.950302	1.24998e-12	1.11717e-10
Soltu.DM.03G013210	Soltu.DM.03G026240	0.957083	2.56967e-13	3.02343e-11
Soltu.DM.03G013210	Soltu.DM.09G001890	0.940963	7.9521e-12	4.76383e-10
Soltu.DM.03G013210	Soltu.DM.09G010080	0.929355	5.42318e-11	2.26726e-09
Soltu.DM.03G013210	Soltu.DM.12G005780	0.902603	1.63335e-09	3.92299e-08
Soltu.DM.03G013210	Soltu.DM.03G025430	0.963587	4.34358e-14	7.76415e-12
Soltu.DM.03G013210	Soltu.DM.03G025440	0.971915	2.5949e-15	8.17614e-13
Soltu.DM.03G013210	Soltu.DM.03G025470	0.907178	9.83408e-10	2.55898e-08
Soltu.DM.03G013210	Soltu.DM.04G022680	0.965786	2.21169e-14	4.30196e-12
Soltu.DM.03G013210	Soltu.DM.05G013210	0.943301	5.15444e-12	3.36214e-10
Soltu.DM.03G013210	Soltu.DM.08G027040	0.937698	1.41562e-11	7.51897e-10
Soltu.DM.03G017000	Soltu.DM.01G022390	0.976542	3.65904e-16	1.74414e-13
Soltu.DM.03G017000	Soltu.DM.01G031880	0.954735	4.5656e-13	4.81836e-11
Soltu.DM.03G017000	Soltu.DM.01G032810	0.968842	8.0169e-15	2.01398e-12
Soltu.DM.03G017000	Soltu.DM.01G040860	0.915475	3.65241e-10	1.08637e-08
Soltu.DM.03G017000	Soltu.DM.01G041520	0.908796	8.16774e-10	2.18158e-08
Soltu.DM.03G017000	Soltu.DM.01G047000	0.947072	2.46082e-12	1.8982e-10
Soltu.DM.03G017000	Soltu.DM.02G010760	0.968336	9.54808e-15	2.30518e-12
Soltu.DM.03G017000	Soltu.DM.03G004240	0.949784	1.39753e-12	1.22761e-10
Soltu.DM.03G017000	Soltu.DM.03G009170	0.931784	3.73281e-11	1.6641e-09
Soltu.DM.03G017000	Soltu.DM.03G009770	0.95798	2.04535e-13	2.53487e-11
Soltu.DM.03G017000	Soltu.DM.03G026240	0.907964	8.98962e-10	2.3671e-08
Soltu.DM.03G017000	Soltu.DM.05G025250	0.962419	6.11528e-14	9.63416e-12
Soltu.DM.03G017000	Soltu.DM.08G028670	0.933887	2.67187e-11	1.25429e-09
Soltu.DM.03G017000	Soltu.DM.09G010080	0.958734	1.68191e-13	2.18648e-11
Soltu.DM.03G017000	Soltu.DM.09G031500	0.963141	4.95569e-14	8.37512e-12
Soltu.DM.03G017000	Soltu.DM.11G026060	0.920165	1.99318e-10	6.56971e-09
Soltu.DM.03G017000	Soltu.DM.12G005780	0.905671	1.16564e-09	2.98065e-08
Soltu.DM.03G017000	Soltu.DM.03G001330	0.913499	4.66581e-10	1.34477e-08
Soltu.DM.03G017000	Soltu.DM.11G002410	0.959746	1.28588e-13	1.76652e-11
Soltu.DM.03G017000	Soltu.DM.03G025330	0.968883	7.90283e-15	2.01251e-12
Soltu.DM.03G017000	Soltu.DM.03G025430	0.948185	1.95801e-12	1.61775e-10
Soltu.DM.03G017000	Soltu.DM.03G025440	0.918332	2.53638e-10	8.03259e-09
Soltu.DM.03G017000	Soltu.DM.03G025470	0.986926	6.18528e-19	1.64263e-15
Soltu.DM.03G017000	Soltu.DM.04G022680	0.947766	2.13521e-12	1.71093e-10
Soltu.DM.03G017000	Soltu.DM.04G022860	0.972816	1.82008e-15	6.384e-13
Soltu.DM.03G017000	Soltu.DM.05G013210	0.926359	8.44325e-11	3.24969e-09
Soltu.DM.03G017000	Soltu.DM.09G002710	0.943448	5.01278e-12	3.2997e-10
Soltu.DM.03G017000	Soltu.DM.11G007260	0.958348	1.85959e-13	2.35169e-11
Soltu.DM.03G017000	Soltu.DM.11G007270	0.965535	2.39414e-14	4.54155e-12
Soltu.DM.03G017000	Soltu.DM.11G007280	0.987551	3.62099e-19	1.2788e-15
Soltu.DM.03G019030	Soltu.DM.12G026540	0.913798	4.49754e-10	1.30436e-08
Soltu.DM.03G019030	Soltu.DM.03G034580	0.918476	2.48922e-10	7.90073e-09
Soltu.DM.03G021840	Soltu.DM.01G041460	0.90594	1.13098e-09	2.89599e-08
Soltu.DM.03G021840	Soltu.DM.03G012000	0.939435	1.04579e-11	5.83818e-10
Soltu.DM.03G021840	Soltu.DM.06G013570	0.900991	1.94154e-09	4.49481e-08
Soltu.DM.03G021840	Soltu.DM.07G005240	0.901307	1.87737e-09	4.37897e-08
Soltu.DM.03G021840	Soltu.DM.01G037650	0.929619	5.21069e-11	2.19652e-09
Soltu.DM.03G024640	Soltu.DM.12G026540	0.945664	3.26353e-12	2.32537e-10
Soltu.DM.03G024640	Soltu.DM.03G022810	0.940291	8.97738e-12	5.2153e-10
Soltu.DM.03G029900	Soltu.DM.10G025490	0.928679	6.00275e-11	2.45795e-09
Soltu.DM.03G029980	Soltu.DM.01G002130	0.946476	2.77562e-12	2.05453e-10
Soltu.DM.03G029980	Soltu.DM.01G003440	0.916296	3.2937e-10	9.92419e-09
Soltu.DM.03G029980	Soltu.DM.01G045800	0.970043	5.23015e-15	1.47316e-12
Soltu.DM.03G029980	Soltu.DM.02G019240	0.919046	2.31074e-10	7.44483e-09
Soltu.DM.03G029980	Soltu.DM.02G033170	0.977927	1.88595e-16	1.00171e-13
Soltu.DM.03G029980	Soltu.DM.03G002620	0.9238	1.21461e-10	4.40149e-09
Soltu.DM.03G029980	Soltu.DM.10G002080	0.970235	4.87854e-15	1.41611e-12
Soltu.DM.03G029980	Soltu.DM.07G014090	0.965826	2.184e-14	4.30196e-12
Soltu.DM.03G030070	Soltu.DM.01G022390	0.949855	1.3763e-12	1.21835e-10
Soltu.DM.03G030070	Soltu.DM.01G032810	0.94358	4.88871e-12	3.25739e-10
Soltu.DM.03G030070	Soltu.DM.01G040860	0.90638	1.07649e-09	2.76789e-08
Soltu.DM.03G030070	Soltu.DM.02G010760	0.945642	3.27729e-12	2.32537e-10
Soltu.DM.03G030070	Soltu.DM.03G009770	0.921781	1.60402e-10	5.47134e-09
Soltu.DM.03G030070	Soltu.DM.04G009040	-0.907696	9.2706e-10	2.43419e-08
Soltu.DM.03G030070	Soltu.DM.08G028670	0.945986	3.06106e-12	2.21421e-10
Soltu.DM.03G030070	Soltu.DM.09G031500	0.93889	1.15114e-11	6.36893e-10
Soltu.DM.03G030070	Soltu.DM.11G002410	0.92874	5.9483e-11	2.44712e-09
Soltu.DM.03G030070	Soltu.DM.03G022810	0.923659	1.23866e-10	4.4712e-09
Soltu.DM.03G030070	Soltu.DM.03G025330	0.919558	2.16016e-10	7.05755e-09
Soltu.DM.03G030070	Soltu.DM.03G025470	0.904632	1.30843e-09	3.26999e-08
Soltu.DM.03G030070	Soltu.DM.04G022860	0.943189	5.2652e-12	3.42238e-10
Soltu.DM.03G030070	Soltu.DM.04G035960	0.934852	2.28292e-11	1.09988e-09
Soltu.DM.03G030070	Soltu.DM.09G002710	0.923064	1.34533e-10	4.79113e-09
Soltu.DM.03G030070	Soltu.DM.11G007270	0.913584	4.61736e-10	1.33287e-08
Soltu.DM.03G030070	Soltu.DM.11G007280	0.935998	1.88821e-11	9.49621e-10
Soltu.DM.03G031310	Soltu.DM.01G022390	0.956161	3.23253e-13	3.64198e-11
Soltu.DM.03G031310	Soltu.DM.01G031880	0.912799	5.08121e-10	1.44877e-08
Soltu.DM.03G031310	Soltu.DM.01G032810	0.963819	4.05332e-14	7.38737e-12
Soltu.DM.03G031310	Soltu.DM.01G041520	0.918877	2.36242e-10	7.57195e-09
Soltu.DM.03G031310	Soltu.DM.01G047000	0.909749	7.3095e-10	1.99243e-08
Soltu.DM.03G031310	Soltu.DM.02G010760	0.958965	1.58262e-13	2.10149e-11
Soltu.DM.03G031310	Soltu.DM.03G004240	0.921104	1.75772e-10	5.91957e-09
Soltu.DM.03G031310	Soltu.DM.03G009770	0.917635	2.77592e-10	8.6534e-09
Soltu.DM.03G031310	Soltu.DM.05G025250	0.901407	1.85755e-09	4.35458e-08
Soltu.DM.03G031310	Soltu.DM.08G028670	0.939892	9.64215e-12	5.46876e-10
Soltu.DM.03G031310	Soltu.DM.09G031500	0.914667	4.03975e-10	1.19394e-08
Soltu.DM.03G031310	Soltu.DM.11G026060	0.946972	2.5114e-12	1.92712e-10
Soltu.DM.03G031310	Soltu.DM.11G002410	0.958999	1.56858e-13	2.09783e-11
Soltu.DM.03G031310	Soltu.DM.03G025330	0.9474	2.30167e-12	1.79592e-10
Soltu.DM.03G031310	Soltu.DM.03G025470	0.957365	2.39254e-13	2.86951e-11
Soltu.DM.03G031310	Soltu.DM.04G022860	0.95361	5.95065e-13	5.94745e-11
Soltu.DM.03G031310	Soltu.DM.11G007260	0.909715	7.33838e-10	1.99445e-08
Soltu.DM.03G031310	Soltu.DM.11G007270	0.935213	2.15148e-11	1.04702e-09
Soltu.DM.03G031310	Soltu.DM.11G007280	0.940612	8.4735e-12	4.96916e-10
Soltu.DM.03G032480	Soltu.DM.02G014900	0.909325	7.68054e-10	2.06596e-08
Soltu.DM.03G032480	Soltu.DM.03G026240	0.902002	1.74282e-09	4.13637e-08
Soltu.DM.03G032480	Soltu.DM.04G005020	0.904161	1.3782e-09	3.4161e-08
Soltu.DM.03G034030	Soltu.DM.08G015940	0.966604	1.70132e-14	3.55365e-12
Soltu.DM.03G034030	Soltu.DM.01G031880	0.958664	1.71272e-13	2.21107e-11
Soltu.DM.03G034030	Soltu.DM.01G032810	0.916887	3.05527e-10	9.38802e-09
Soltu.DM.03G034030	Soltu.DM.01G047000	0.956176	3.21992e-13	3.64198e-11
Soltu.DM.03G034030	Soltu.DM.02G015770	0.976695	3.40678e-16	1.66663e-13
Soltu.DM.03G034030	Soltu.DM.03G004240	0.903399	1.49818e-09	3.65981e-08
Soltu.DM.03G034030	Soltu.DM.03G005050	0.977981	1.8363e-16	1.00171e-13
Soltu.DM.03G034030	Soltu.DM.03G009170	0.983579	7.47732e-18	7.31596e-15
Soltu.DM.03G034030	Soltu.DM.03G026240	0.958084	1.99097e-13	2.48404e-11
Soltu.DM.03G034030	Soltu.DM.05G025250	0.920802	1.8306e-10	6.10966e-09
Soltu.DM.03G034030	Soltu.DM.09G001890	0.910244	6.89689e-10	1.89384e-08
Soltu.DM.03G034030	Soltu.DM.09G010080	0.96058	1.02548e-13	1.45524e-11
Soltu.DM.03G034030	Soltu.DM.09G031500	0.90362	1.46241e-09	3.58657e-08
Soltu.DM.03G034030	Soltu.DM.03G025430	0.986468	9.01942e-19	1.79046e-15
Soltu.DM.03G034030	Soltu.DM.03G025440	0.995435	6.04681e-24	1.1241e-19
Soltu.DM.03G034030	Soltu.DM.03G025470	0.933792	2.71314e-11	1.26409e-09
Soltu.DM.03G034030	Soltu.DM.04G005020	0.900107	2.13208e-09	4.83735e-08
Soltu.DM.03G034030	Soltu.DM.04G022680	0.986446	9.17625e-19	1.79046e-15
Soltu.DM.03G034030	Soltu.DM.05G013210	0.953081	6.72431e-13	6.57921e-11
Soltu.DM.03G036750	Soltu.DM.03G022640	0.908445	8.50545e-10	2.25731e-08
Soltu.DM.03G036750	Soltu.DM.07G023160	0.92305	1.34797e-10	4.79137e-09
Soltu.DM.04G007690	Soltu.DM.01G002130	0.96676	1.61715e-14	3.47366e-12
Soltu.DM.04G007690	Soltu.DM.01G003440	0.906908	1.01403e-09	2.62182e-08
Soltu.DM.04G007690	Soltu.DM.01G045800	0.972584	1.99626e-15	6.62687e-13
Soltu.DM.04G007690	Soltu.DM.02G019240	0.906699	1.0383e-09	2.67713e-08
Soltu.DM.04G007690	Soltu.DM.02G033170	0.985766	1.56806e-18	2.24232e-15
Soltu.DM.04G007690	Soltu.DM.03G002620	0.901175	1.90401e-09	4.42998e-08
Soltu.DM.04G007690	Soltu.DM.10G002080	0.968014	1.06561e-14	2.47622e-12
Soltu.DM.04G007690	Soltu.DM.07G014090	0.952452	7.76117e-13	7.32387e-11
Soltu.DM.04G008930	Soltu.DM.01G038050	0.922361	1.482e-10	5.13471e-09
Soltu.DM.04G027450	Soltu.DM.01G002130	0.95386	5.61317e-13	5.70212e-11
Soltu.DM.04G027450	Soltu.DM.01G003440	0.912331	5.37719e-10	1.52614e-08
Soltu.DM.04G027450	Soltu.DM.01G045800	0.930364	4.65161e-11	2.00635e-09
Soltu.DM.04G027450	Soltu.DM.02G033170	0.940874	8.08146e-12	4.79982e-10
Soltu.DM.04G027450	Soltu.DM.03G022970	0.910737	6.50619e-10	1.80522e-08
Soltu.DM.04G027450	Soltu.DM.03G025950	0.900029	2.14961e-09	4.8674e-08
Soltu.DM.04G027450	Soltu.DM.10G002080	0.948271	1.92328e-12	1.60331e-10
Soltu.DM.04G027450	Soltu.DM.07G014090	0.904247	1.36517e-09	3.38831e-08
Soltu.DM.04G034890	Soltu.DM.01G038050	0.90049	2.0475e-09	4.68756e-08
Soltu.DM.04G035460	Soltu.DM.08G015940	0.92801	6.63083e-11	2.65662e-09
Soltu.DM.04G035460	Soltu.DM.01G031880	0.918289	2.55066e-10	8.0504e-09
Soltu.DM.04G035460	Soltu.DM.01G047000	0.924412	1.11467e-10	4.08711e-09
Soltu.DM.04G035460	Soltu.DM.02G015770	0.947819	2.11201e-12	1.70705e-10
Soltu.DM.04G035460	Soltu.DM.03G005050	0.94242	6.08251e-12	3.85917e-10
Soltu.DM.04G035460	Soltu.DM.03G009170	0.948776	1.73092e-12	1.4693e-10
Soltu.DM.04G035460	Soltu.DM.09G010080	0.937509	1.46225e-11	7.67887e-10
Soltu.DM.04G035460	Soltu.DM.03G025430	0.901715	1.79734e-09	4.22944e-08
Soltu.DM.04G035460	Soltu.DM.03G025440	0.909587	7.44905e-10	2.02157e-08
Soltu.DM.05G004710	Soltu.DM.01G022390	0.974207	1.02813e-15	4.34385e-13
Soltu.DM.05G004710	Soltu.DM.01G031880	0.927336	7.32346e-11	2.88439e-09
Soltu.DM.05G004710	Soltu.DM.01G032810	0.961693	7.52088e-14	1.14601e-11
Soltu.DM.05G004710	Soltu.DM.01G047000	0.937217	1.53716e-11	7.93772e-10
Soltu.DM.05G004710	Soltu.DM.02G010760	0.947777	2.13064e-12	1.71093e-10
Soltu.DM.05G004710	Soltu.DM.03G004240	0.933706	2.75094e-11	1.27531e-09
Soltu.DM.05G004710	Soltu.DM.03G009170	0.914833	3.9576e-10	1.17339e-08
Soltu.DM.05G004710	Soltu.DM.03G009770	0.937524	1.45844e-11	7.67887e-10
Soltu.DM.05G004710	Soltu.DM.05G025250	0.923519	1.26309e-10	4.54173e-09
Soltu.DM.05G004710	Soltu.DM.08G028670	0.937046	1.58239e-11	8.14746e-10
Soltu.DM.05G004710	Soltu.DM.09G010080	0.922782	1.39864e-10	4.92439e-09
Soltu.DM.05G004710	Soltu.DM.09G031500	0.947478	2.26556e-12	1.77743e-10
Soltu.DM.05G004710	Soltu.DM.11G026060	0.938716	1.18669e-11	6.52678e-10
Soltu.DM.05G004710	Soltu.DM.11G002410	0.957244	2.46712e-13	2.9348e-11
Soltu.DM.05G004710	Soltu.DM.03G025330	0.944204	4.33896e-12	2.95462e-10
Soltu.DM.05G004710	Soltu.DM.03G025430	0.913703	4.55021e-10	1.31758e-08
Soltu.DM.05G004710	Soltu.DM.03G025470	0.979881	6.86233e-17	4.39899e-14
Soltu.DM.05G004710	Soltu.DM.04G022680	0.923185	1.323e-10	4.73882e-09
Soltu.DM.05G004710	Soltu.DM.04G022860	0.96339	4.60565e-14	7.89564e-12
Soltu.DM.05G004710	Soltu.DM.09G002710	0.918249	2.56391e-10	8.07848e-09
Soltu.DM.05G004710	Soltu.DM.11G007260	0.936554	1.71992e-11	8.75983e-10
Soltu.DM.05G004710	Soltu.DM.11G007270	0.968238	9.87382e-15	2.35326e-12
Soltu.DM.05G004710	Soltu.DM.11G007280	0.964662	3.13959e-14	5.83649e-12
Soltu.DM.05G005300	Soltu.DM.01G002130	0.933849	2.68804e-11	1.25842e-09
Soltu.DM.05G005300	Soltu.DM.01G045800	0.927148	7.52815e-11	2.94628e-09
Soltu.DM.05G005300	Soltu.DM.02G033170	0.902133	1.71843e-09	4.08511e-08
Soltu.DM.05G005300	Soltu.DM.07G005240	0.901064	1.9266e-09	4.46578e-08
Soltu.DM.05G005300	Soltu.DM.07G023160	0.934728	2.32989e-11	1.11919e-09
Soltu.DM.05G005300	Soltu.DM.07G014090	0.902718	1.61324e-09	3.88976e-08
Soltu.DM.05G006790	Soltu.DM.08G015940	0.907516	9.46238e-10	2.47754e-08
Soltu.DM.05G006790	Soltu.DM.01G022390	0.933835	2.69419e-11	1.25842e-09
Soltu.DM.05G006790	Soltu.DM.01G031880	0.969774	5.76369e-15	1.59921e-12
Soltu.DM.05G006790	Soltu.DM.01G032810	0.966169	1.95761e-14	3.99913e-12
Soltu.DM.05G006790	Soltu.DM.01G047000	0.970524	4.38801e-15	1.29481e-12
Soltu.DM.05G006790	Soltu.DM.02G010760	0.932912	3.12429e-11	1.42704e-09
Soltu.DM.05G006790	Soltu.DM.02G015770	0.944241	4.30783e-12	2.94421e-10
Soltu.DM.05G006790	Soltu.DM.03G004240	0.942516	5.97399e-12	3.8033e-10
Soltu.DM.05G006790	Soltu.DM.03G005050	0.937278	1.52124e-11	7.89941e-10
Soltu.DM.05G006790	Soltu.DM.03G009170	0.970194	4.95145e-15	1.41611e-12
Soltu.DM.05G006790	Soltu.DM.03G009770	0.944772	3.88702e-12	2.69626e-10
Soltu.DM.05G006790	Soltu.DM.03G026240	0.911092	6.23829e-10	1.74917e-08
Soltu.DM.05G006790	Soltu.DM.05G025250	0.939348	1.06191e-11	5.91044e-10
Soltu.DM.05G006790	Soltu.DM.09G010080	0.974025	1.10962e-15	4.48432e-13
Soltu.DM.05G006790	Soltu.DM.09G031500	0.955644	3.66833e-13	4.03517e-11
Soltu.DM.05G006790	Soltu.DM.03G001330	0.911781	5.74504e-10	1.62805e-08
Soltu.DM.05G006790	Soltu.DM.03G025330	0.953717	5.80384e-13	5.86377e-11
Soltu.DM.05G006790	Soltu.DM.03G025430	0.965301	2.57684e-14	4.83873e-12
Soltu.DM.05G006790	Soltu.DM.03G025440	0.955019	4.26579e-13	4.55753e-11
Soltu.DM.05G006790	Soltu.DM.03G025470	0.978214	1.63499e-16	9.21046e-14
Soltu.DM.05G006790	Soltu.DM.04G022680	0.96838	9.40314e-15	2.30006e-12
Soltu.DM.05G006790	Soltu.DM.04G022860	0.929096	5.63853e-11	2.33453e-09
Soltu.DM.05G006790	Soltu.DM.05G013210	0.923246	1.31194e-10	4.70828e-09
Soltu.DM.05G006790	Soltu.DM.09G002710	0.908477	8.4744e-10	2.25634e-08
Soltu.DM.05G006790	Soltu.DM.11G007260	0.935361	2.09951e-11	1.02981e-09
Soltu.DM.05G006790	Soltu.DM.11G007270	0.957022	2.60897e-13	3.05036e-11
Soltu.DM.05G006790	Soltu.DM.11G007280	0.952162	8.28658e-13	7.74108e-11
Soltu.DM.05G010540	Soltu.DM.10G025490	0.939781	9.83465e-12	5.52345e-10
Soltu.DM.05G012130	Soltu.DM.01G002130	0.953294	6.40171e-13	6.3302e-11
Soltu.DM.05G012130	Soltu.DM.01G045800	0.982055	1.97087e-17	1.59297e-14
Soltu.DM.05G012130	Soltu.DM.02G019240	0.955197	4.08786e-13	4.47019e-11
Soltu.DM.05G012130	Soltu.DM.02G033170	0.938662	1.19787e-11	6.56886e-10
Soltu.DM.05G012130	Soltu.DM.03G002620	0.901826	1.77607e-09	4.19989e-08
Soltu.DM.05G012130	Soltu.DM.03G012000	0.922691	1.41625e-10	4.95819e-09
Soltu.DM.05G012130	Soltu.DM.05G004640	0.940681	8.36918e-12	4.93914e-10
Soltu.DM.05G012130	Soltu.DM.07G005240	0.946672	2.66816e-12	2.00338e-10
Soltu.DM.05G012130	Soltu.DM.10G002080	0.920005	2.03598e-10	6.69892e-09
Soltu.DM.05G012130	Soltu.DM.07G014090	0.938337	1.26756e-11	6.89003e-10
Soltu.DM.05G019980	Soltu.DM.01G041460	0.925342	9.77041e-11	3.6917e-09
Soltu.DM.05G019980	Soltu.DM.01G045800	0.916427	3.23909e-10	9.79099e-09
Soltu.DM.05G019980	Soltu.DM.02G019240	0.931133	4.13171e-11	1.80726e-09
Soltu.DM.05G019980	Soltu.DM.03G012000	0.924945	1.03379e-10	3.84256e-09
Soltu.DM.05G019980	Soltu.DM.06G013570	0.905164	1.23343e-09	3.12816e-08
Soltu.DM.05G019980	Soltu.DM.07G005240	0.94821	1.94816e-12	1.6168e-10
Soltu.DM.05G019980	Soltu.DM.07G018570	0.929922	4.97587e-11	2.10709e-09
Soltu.DM.05G019980	Soltu.DM.01G037650	0.938259	1.28503e-11	6.96461e-10
Soltu.DM.05G020900	Soltu.DM.01G002130	0.927545	7.10132e-11	2.8208e-09
Soltu.DM.05G020900	Soltu.DM.01G045800	0.953481	6.1316e-13	6.09553e-11
Soltu.DM.05G020900	Soltu.DM.02G019240	0.928699	5.98475e-11	2.45599e-09
Soltu.DM.05G020900	Soltu.DM.07G005240	0.941575	7.11143e-12	4.35028e-10
Soltu.DM.05G020900	Soltu.DM.07G018570	0.909415	7.60079e-10	2.0544e-08
Soltu.DM.05G020900	Soltu.DM.07G023160	0.903852	1.42577e-09	3.50596e-08
Soltu.DM.05G020900	Soltu.DM.07G014090	0.924829	1.05094e-10	3.88448e-09
Soltu.DM.05G021250	Soltu.DM.01G038050	0.913338	4.75846e-10	1.36723e-08
Soltu.DM.05G022590	Soltu.DM.03G022670	0.918295	2.54861e-10	8.0504e-09
Soltu.DM.05G023150	Soltu.DM.01G002130	0.938427	1.24804e-11	6.80385e-10
Soltu.DM.05G023150	Soltu.DM.01G045800	0.907635	9.33466e-10	2.44755e-08
Soltu.DM.05G023150	Soltu.DM.07G005240	0.904087	1.38944e-09	3.43937e-08
Soltu.DM.05G023150	Soltu.DM.07G023160	0.911068	6.25589e-10	1.75146e-08
Soltu.DM.05G023310	Soltu.DM.01G003440	0.920739	1.8461e-10	6.15036e-09
Soltu.DM.05G023310	Soltu.DM.03G022970	0.962523	5.93323e-14	9.42724e-12
Soltu.DM.05G023310	Soltu.DM.06G025730	0.925242	9.91092e-11	3.72964e-09
Soltu.DM.06G018130	Soltu.DM.01G022390	0.968733	8.32418e-15	2.06329e-12
Soltu.DM.06G018130	Soltu.DM.01G031880	0.9594	1.41049e-13	1.91395e-11
Soltu.DM.06G018130	Soltu.DM.01G032810	0.949494	1.48676e-12	1.29154e-10
Soltu.DM.06G018130	Soltu.DM.01G041520	0.907074	9.95183e-10	2.58386e-08
Soltu.DM.06G018130	Soltu.DM.02G010760	0.962623	5.76444e-14	9.31835e-12
Soltu.DM.06G018130	Soltu.DM.03G009770	0.908104	8.84627e-10	2.33265e-08
Soltu.DM.06G018130	Soltu.DM.03G035800	0.922442	1.46562e-10	5.11002e-09
Soltu.DM.06G018130	Soltu.DM.05G025250	0.907843	9.11553e-10	2.39686e-08
Soltu.DM.06G018130	Soltu.DM.08G028670	0.909221	7.77475e-10	2.08561e-08
Soltu.DM.06G018130	Soltu.DM.09G010080	0.935938	1.90747e-11	9.55792e-10
Soltu.DM.06G018130	Soltu.DM.09G031500	0.964261	3.54764e-14	6.52977e-12
Soltu.DM.06G018130	Soltu.DM.03G001330	0.932503	3.33386e-11	1.50794e-09
Soltu.DM.06G018130	Soltu.DM.11G002410	0.93376	2.72692e-11	1.26733e-09
Soltu.DM.06G018130	Soltu.DM.03G025330	0.944688	3.95071e-12	2.73025e-10
Soltu.DM.06G018130	Soltu.DM.03G025430	0.921564	1.652e-10	5.62466e-09
Soltu.DM.06G018130	Soltu.DM.03G025470	0.93532	2.11369e-11	1.03404e-09
Soltu.DM.06G018130	Soltu.DM.04G022860	0.961355	8.27137e-14	1.24004e-11
Soltu.DM.06G018130	Soltu.DM.09G002710	0.916282	3.29916e-10	9.92419e-09
Soltu.DM.06G018130	Soltu.DM.11G007260	0.944007	4.50592e-12	3.046e-10
Soltu.DM.06G018130	Soltu.DM.11G007270	0.931556	3.86867e-11	1.71643e-09
Soltu.DM.06G018130	Soltu.DM.11G007280	0.946924	2.53611e-12	1.93223e-10
Soltu.DM.06G018400	Soltu.DM.11G012170	0.943492	4.97141e-12	3.2997e-10
Soltu.DM.06G018400	Soltu.DM.10G025490	0.90359	1.46712e-09	3.59339e-08
Soltu.DM.06G024060	Soltu.DM.01G038050	0.955079	4.20512e-13	4.54495e-11
Soltu.DM.06G024060	Soltu.DM.09G018860	0.911035	6.2807e-10	1.75313e-08
Soltu.DM.06G025370	Soltu.DM.08G015940	0.947672	2.17695e-12	1.72211e-10
Soltu.DM.06G025370	Soltu.DM.01G031880	0.961285	8.43403e-14	1.25431e-11
Soltu.DM.06G025370	Soltu.DM.01G032810	0.938588	1.21344e-11	6.63467e-10
Soltu.DM.06G025370	Soltu.DM.01G047000	0.979244	9.64337e-17	5.97567e-14
Soltu.DM.06G025370	Soltu.DM.02G015770	0.974084	1.08255e-15	4.47213e-13
Soltu.DM.06G025370	Soltu.DM.03G004240	0.933299	2.93679e-11	1.35136e-09
Soltu.DM.06G025370	Soltu.DM.03G005050	0.968153	1.01632e-14	2.39158e-12
Soltu.DM.06G025370	Soltu.DM.03G009170	0.984722	3.39912e-18	4.13455e-15
Soltu.DM.06G025370	Soltu.DM.03G009770	0.922431	1.46786e-10	5.11002e-09
Soltu.DM.06G025370	Soltu.DM.03G026240	0.960416	1.07237e-13	1.51025e-11
Soltu.DM.06G025370	Soltu.DM.05G025250	0.934045	2.60415e-11	1.23184e-09
Soltu.DM.06G025370	Soltu.DM.09G001890	0.930945	4.25318e-11	1.84305e-09
Soltu.DM.06G025370	Soltu.DM.09G010080	0.967824	1.13644e-14	2.57638e-12
Soltu.DM.06G025370	Soltu.DM.09G031500	0.915795	3.50856e-10	1.04862e-08
Soltu.DM.06G025370	Soltu.DM.12G005780	0.912422	5.31859e-10	1.51413e-08
Soltu.DM.06G025370	Soltu.DM.03G025330	0.917686	2.75772e-10	8.63401e-09
Soltu.DM.06G025370	Soltu.DM.03G025430	0.987804	2.89132e-19	1.2788e-15
Soltu.DM.06G025370	Soltu.DM.03G025440	0.991754	3.9747e-21	2.46299e-17
Soltu.DM.06G025370	Soltu.DM.03G025470	0.955946	3.40718e-13	3.81564e-11
Soltu.DM.06G025370	Soltu.DM.04G022680	0.993343	3.80011e-22	3.5322e-18
Soltu.DM.06G025370	Soltu.DM.05G013210	0.955842	3.49546e-13	3.89105e-11
Soltu.DM.06G025370	Soltu.DM.08G027040	0.907171	9.84223e-10	2.55898e-08
Soltu.DM.06G025800	Soltu.DM.03G022680	0.927282	7.38169e-11	2.90118e-09
Soltu.DM.06G025850	Soltu.DM.08G015940	0.902235	1.69968e-09	4.05419e-08
Soltu.DM.06G025850	Soltu.DM.01G022390	0.947385	2.3089e-12	1.79592e-10
Soltu.DM.06G025850	Soltu.DM.01G031880	0.973498	1.38061e-15	5.34699e-13
Soltu.DM.06G025850	Soltu.DM.01G032810	0.975282	6.46813e-16	2.93275e-13
Soltu.DM.06G025850	Soltu.DM.01G041520	0.905633	1.17063e-09	2.98928e-08
Soltu.DM.06G025850	Soltu.DM.01G047000	0.962303	6.32267e-14	9.87718e-12
Soltu.DM.06G025850	Soltu.DM.02G010760	0.954329	5.02751e-13	5.16362e-11
Soltu.DM.06G025850	Soltu.DM.02G015770	0.923	1.3572e-10	4.80579e-09
Soltu.DM.06G025850	Soltu.DM.03G004240	0.940466	8.70023e-12	5.08608e-10
Soltu.DM.06G025850	Soltu.DM.03G005050	0.92592	8.99445e-11	3.41936e-09
Soltu.DM.06G025850	Soltu.DM.03G009170	0.956568	2.92268e-13	3.3747e-11
Soltu.DM.06G025850	Soltu.DM.03G009770	0.935495	2.05322e-11	1.01785e-09
Soltu.DM.06G025850	Soltu.DM.03G026240	0.926326	8.48392e-11	3.2586e-09
Soltu.DM.06G025850	Soltu.DM.03G035800	0.904744	1.29227e-09	3.2552e-08
Soltu.DM.06G025850	Soltu.DM.05G025250	0.963029	5.12125e-14	8.57695e-12
Soltu.DM.06G025850	Soltu.DM.09G010080	0.96227	6.38281e-14	9.88803e-12
Soltu.DM.06G025850	Soltu.DM.09G031500	0.957733	2.17904e-13	2.66502e-11
Soltu.DM.06G025850	Soltu.DM.11G026060	0.907193	9.81818e-10	2.55898e-08
Soltu.DM.06G025850	Soltu.DM.12G005780	0.904383	1.3448e-09	3.34671e-08
Soltu.DM.06G025850	Soltu.DM.03G001330	0.92935	5.42729e-11	2.26726e-09
Soltu.DM.06G025850	Soltu.DM.11G002410	0.928738	5.94995e-11	2.44712e-09
Soltu.DM.06G025850	Soltu.DM.03G025330	0.966723	1.63679e-14	3.47366e-12
Soltu.DM.06G025850	Soltu.DM.03G025430	0.97309	1.63057e-15	5.94503e-13
Soltu.DM.06G025850	Soltu.DM.03G025440	0.952501	7.67641e-13	7.31818e-11
Soltu.DM.06G025850	Soltu.DM.03G025470	0.981838	2.24702e-17	1.74051e-14
Soltu.DM.06G025850	Soltu.DM.04G022680	0.967854	1.12468e-14	2.57638e-12
Soltu.DM.06G025850	Soltu.DM.04G022860	0.942628	5.85109e-12	3.75075e-10
Soltu.DM.06G025850	Soltu.DM.05G013210	0.933941	2.64833e-11	1.24639e-09
Soltu.DM.06G025850	Soltu.DM.11G007260	0.953201	6.5401e-13	6.43283e-11
Soltu.DM.06G025850	Soltu.DM.11G007270	0.954722	4.57963e-13	4.81836e-11
Soltu.DM.06G025850	Soltu.DM.11G007280	0.958736	1.68069e-13	2.18648e-11
Soltu.DM.06G026430	Soltu.DM.08G015940	0.928579	6.09284e-11	2.47847e-09
Soltu.DM.06G026430	Soltu.DM.01G031880	0.962776	5.51382e-14	8.99139e-12
Soltu.DM.06G026430	Soltu.DM.01G032810	0.952698	7.33947e-13	7.08508e-11
Soltu.DM.06G026430	Soltu.DM.01G047000	0.9574	2.37172e-13	2.863e-11
Soltu.DM.06G026430	Soltu.DM.02G015770	0.953642	5.9057e-13	5.93443e-11
Soltu.DM.06G026430	Soltu.DM.03G004240	0.902338	1.68091e-09	4.02216e-08
Soltu.DM.06G026430	Soltu.DM.03G005050	0.961979	6.93466e-14	1.06542e-11
Soltu.DM.06G026430	Soltu.DM.03G009170	0.974743	8.17937e-16	3.62035e-13
Soltu.DM.06G026430	Soltu.DM.03G026240	0.922434	1.46719e-10	5.11002e-09
Soltu.DM.06G026430	Soltu.DM.09G010080	0.951946	8.6997e-13	8.04614e-11
Soltu.DM.06G026430	Soltu.DM.09G031500	0.917683	2.7588e-10	8.63401e-09
Soltu.DM.06G026430	Soltu.DM.03G025330	0.918583	2.45507e-10	7.81501e-09
Soltu.DM.06G026430	Soltu.DM.03G025430	0.969436	6.50415e-15	1.77812e-12
Soltu.DM.06G026430	Soltu.DM.03G025440	0.972673	1.92694e-15	6.51305e-13
Soltu.DM.06G026430	Soltu.DM.03G025470	0.9402	9.12476e-12	5.2844e-10
Soltu.DM.06G026430	Soltu.DM.04G022680	0.963713	4.18336e-14	7.55036e-12
Soltu.DM.06G026430	Soltu.DM.05G013210	0.922355	1.48324e-10	5.13471e-09
Soltu.DM.06G028530	Soltu.DM.01G022390	0.944927	3.77142e-12	2.64569e-10
Soltu.DM.06G028530	Soltu.DM.02G010760	0.924249	1.14062e-10	4.16086e-09
Soltu.DM.06G028530	Soltu.DM.04G009040	-0.923687	1.23383e-10	4.46243e-09
Soltu.DM.06G028530	Soltu.DM.08G028670	0.934525	2.40852e-11	1.14879e-09
Soltu.DM.06G028530	Soltu.DM.11G026060	0.910329	6.82833e-10	1.878e-08
Soltu.DM.06G028530	Soltu.DM.11G002410	0.947735	2.1488e-12	1.71443e-10
Soltu.DM.06G028530	Soltu.DM.03G022810	0.931445	3.93613e-11	1.73383e-09
Soltu.DM.06G028530	Soltu.DM.04G022860	0.949151	1.59929e-12	1.37642e-10
Soltu.DM.06G028530	Soltu.DM.10G025490	-0.900696	2.00331e-09	4.61642e-08
Soltu.DM.06G031660	Soltu.DM.01G022390	-0.901878	1.76616e-09	4.18255e-08
Soltu.DM.06G031660	Soltu.DM.04G009040	0.930684	4.42822e-11	1.91443e-09
Soltu.DM.06G031660	Soltu.DM.04G022860	-0.903961	1.40878e-09	3.47338e-08
Soltu.DM.06G032120	Soltu.DM.11G012170	0.915182	3.7889e-10	1.12517e-08
Soltu.DM.06G032320	Soltu.DM.01G022390	-0.948069	2.00574e-12	1.64259e-10
Soltu.DM.06G032320	Soltu.DM.01G032810	-0.91475	3.99857e-10	1.18365e-08
Soltu.DM.06G032320	Soltu.DM.01G040860	-0.90463	1.3087e-09	3.26999e-08
Soltu.DM.06G032320	Soltu.DM.02G010760	-0.949575	1.46143e-12	1.27549e-10
Soltu.DM.06G032320	Soltu.DM.04G009040	0.910201	6.93151e-10	1.90054e-08
Soltu.DM.06G032320	Soltu.DM.08G028670	-0.94681	2.59488e-12	1.96228e-10
Soltu.DM.06G032320	Soltu.DM.09G031500	-0.901319	1.87502e-09	4.37897e-08
Soltu.DM.06G032320	Soltu.DM.11G002410	-0.94623	2.91577e-12	2.11735e-10
Soltu.DM.06G032320	Soltu.DM.03G022810	-0.941315	7.45776e-12	4.51596e-10
Soltu.DM.06G032320	Soltu.DM.03G025330	-0.903976	1.4065e-09	3.47235e-08
Soltu.DM.06G032320	Soltu.DM.04G022860	-0.95234	7.96168e-13	7.47513e-11
Soltu.DM.06G032320	Soltu.DM.04G035960	-0.921462	1.67495e-10	5.68199e-09
Soltu.DM.06G032320	Soltu.DM.09G002710	-0.93742	1.4847e-11	7.77481e-10
Soltu.DM.06G032320	Soltu.DM.11G007280	-0.933199	2.98402e-11	1.3697e-09
Soltu.DM.07G001900	Soltu.DM.01G022390	0.984658	3.55852e-18	4.13455e-15
Soltu.DM.07G001900	Soltu.DM.01G031880	0.933418	2.88128e-11	1.32911e-09
Soltu.DM.07G001900	Soltu.DM.01G032810	0.946664	2.67261e-12	2.00338e-10
Soltu.DM.07G001900	Soltu.DM.01G041520	0.916024	3.4088e-10	1.02209e-08
Soltu.DM.07G001900	Soltu.DM.02G010760	0.971656	2.86689e-15	8.73698e-13
Soltu.DM.07G001900	Soltu.DM.03G009770	0.901993	1.74444e-09	4.13637e-08
Soltu.DM.07G001900	Soltu.DM.08G028670	0.945205	3.57199e-12	2.51527e-10
Soltu.DM.07G001900	Soltu.DM.09G010080	0.908971	8.00342e-10	2.14077e-08
Soltu.DM.07G001900	Soltu.DM.09G031500	0.955055	4.22957e-13	4.54496e-11
Soltu.DM.07G001900	Soltu.DM.11G026060	0.900693	2.00401e-09	4.61642e-08
Soltu.DM.07G001900	Soltu.DM.03G001330	0.93031	4.69001e-11	2.01822e-09
Soltu.DM.07G001900	Soltu.DM.11G002410	0.952476	7.7203e-13	7.32247e-11
Soltu.DM.07G001900	Soltu.DM.03G022810	0.939581	1.01902e-11	5.70591e-10
Soltu.DM.07G001900	Soltu.DM.03G025330	0.941329	7.43896e-12	4.51596e-10
Soltu.DM.07G001900	Soltu.DM.03G025470	0.9288	5.89524e-11	2.43539e-09
Soltu.DM.07G001900	Soltu.DM.04G022860	0.978786	1.2232e-16	7.33528e-14
Soltu.DM.07G001900	Soltu.DM.04G035960	0.900213	2.10825e-09	4.80888e-08
Soltu.DM.07G001900	Soltu.DM.09G002710	0.932598	3.28365e-11	1.48885e-09
Soltu.DM.07G001900	Soltu.DM.11G007260	0.93281	3.17532e-11	1.4468e-09
Soltu.DM.07G001900	Soltu.DM.11G007270	0.935878	1.9265e-11	9.62734e-10
Soltu.DM.07G001900	Soltu.DM.11G007280	0.954696	4.60823e-13	4.81836e-11
Soltu.DM.07G004210	Soltu.DM.01G022390	0.90314	1.541e-09	3.74964e-08
Soltu.DM.07G004210	Soltu.DM.01G031880	0.905197	1.22897e-09	3.1211e-08
Soltu.DM.07G004210	Soltu.DM.01G032810	0.945293	3.51087e-12	2.48164e-10
Soltu.DM.07G004210	Soltu.DM.01G047000	0.935011	2.22413e-11	1.07674e-09
Soltu.DM.07G004210	Soltu.DM.02G010760	0.914282	4.23726e-10	1.23853e-08
Soltu.DM.07G004210	Soltu.DM.03G004240	0.963413	4.57483e-14	7.89564e-12
Soltu.DM.07G004210	Soltu.DM.03G009170	0.904666	1.30355e-09	3.26999e-08
Soltu.DM.07G004210	Soltu.DM.03G009770	0.96082	9.59865e-14	1.38325e-11
Soltu.DM.07G004210	Soltu.DM.05G025250	0.930004	4.91476e-11	2.09074e-09
Soltu.DM.07G004210	Soltu.DM.09G010080	0.913688	4.55881e-10	1.31801e-08
Soltu.DM.07G004210	Soltu.DM.11G002410	0.929538	5.27527e-11	2.21872e-09
Soltu.DM.07G004210	Soltu.DM.03G025330	0.936288	1.79882e-11	9.11171e-10
Soltu.DM.07G004210	Soltu.DM.03G025430	0.935013	2.22351e-11	1.07674e-09
Soltu.DM.07G004210	Soltu.DM.03G025440	0.919105	2.29284e-10	7.39997e-09
Soltu.DM.07G004210	Soltu.DM.03G025470	0.972717	1.89397e-15	6.51305e-13
Soltu.DM.07G004210	Soltu.DM.04G022680	0.950304	1.24928e-12	1.11717e-10
Soltu.DM.07G004210	Soltu.DM.04G022860	0.905966	1.1278e-09	2.89183e-08
Soltu.DM.07G004210	Soltu.DM.05G013210	0.940923	8.00974e-12	4.77247e-10
Soltu.DM.07G004210	Soltu.DM.09G002710	0.904698	1.29888e-09	3.26741e-08
Soltu.DM.07G004210	Soltu.DM.11G007260	0.900792	1.98305e-09	4.57949e-08
Soltu.DM.07G004210	Soltu.DM.11G007270	0.916596	3.17056e-10	9.63082e-09
Soltu.DM.07G004210	Soltu.DM.11G007280	0.939854	9.70786e-12	5.46876e-10
Soltu.DM.07G014960	Soltu.DM.01G034010	0.909314	7.6904e-10	2.06596e-08
Soltu.DM.07G015990	Soltu.DM.12G027420	0.900354	2.07713e-09	4.74561e-08
Soltu.DM.07G017910	Soltu.DM.08G015940	0.946459	2.78505e-12	2.05453e-10
Soltu.DM.07G017910	Soltu.DM.01G022390	0.91041	6.7627e-10	1.86803e-08
Soltu.DM.07G017910	Soltu.DM.01G031880	0.98363	7.22839e-18	7.31596e-15
Soltu.DM.07G017910	Soltu.DM.01G032810	0.954691	4.6136e-13	4.81836e-11
Soltu.DM.07G017910	Soltu.DM.01G047000	0.980041	6.29283e-17	4.18002e-14
Soltu.DM.07G017910	Soltu.DM.02G010760	0.917	3.0113e-10	9.28359e-09
Soltu.DM.07G017910	Soltu.DM.02G015770	0.977113	2.79832e-16	1.44502e-13
Soltu.DM.07G017910	Soltu.DM.03G004240	0.943437	5.0232e-12	3.2997e-10
Soltu.DM.07G017910	Soltu.DM.03G005050	0.966816	1.58801e-14	3.47307e-12
Soltu.DM.07G017910	Soltu.DM.03G009170	0.985223	2.36161e-18	3.13588e-15
Soltu.DM.07G017910	Soltu.DM.03G009770	0.931029	4.19855e-11	1.82362e-09
Soltu.DM.07G017910	Soltu.DM.03G026240	0.954137	5.26078e-13	5.37351e-11
Soltu.DM.07G017910	Soltu.DM.05G025250	0.946359	2.84174e-12	2.08806e-10
Soltu.DM.07G017910	Soltu.DM.09G010080	0.984273	4.66355e-18	5.09973e-15
Soltu.DM.07G017910	Soltu.DM.09G031500	0.94588	3.12624e-12	2.25259e-10
Soltu.DM.07G017910	Soltu.DM.03G025330	0.944772	3.88701e-12	2.69626e-10
Soltu.DM.07G017910	Soltu.DM.03G025430	0.98578	1.55164e-18	2.24232e-15
Soltu.DM.07G017910	Soltu.DM.03G025440	0.978272	1.58853e-16	9.21046e-14
Soltu.DM.07G017910	Soltu.DM.03G025470	0.967702	1.18379e-14	2.6514e-12
Soltu.DM.07G017910	Soltu.DM.04G022680	0.986296	1.03528e-18	1.79046e-15
Soltu.DM.07G017910	Soltu.DM.04G022860	0.904969	1.26044e-09	3.18363e-08
Soltu.DM.07G017910	Soltu.DM.05G013210	0.941635	7.0333e-12	4.34382e-10
Soltu.DM.07G017910	Soltu.DM.11G007260	0.921941	1.5694e-10	5.38285e-09
Soltu.DM.07G017910	Soltu.DM.11G007270	0.93143	3.94519e-11	1.73383e-09
Soltu.DM.07G017910	Soltu.DM.11G007280	0.930036	4.89033e-11	2.08512e-09
Soltu.DM.07G023300	Soltu.DM.07G021820	0.921169	1.74256e-10	5.87917e-09
Soltu.DM.07G025330	Soltu.DM.01G022390	0.955143	4.14056e-13	4.50135e-11
Soltu.DM.07G025330	Soltu.DM.02G010760	0.942536	5.95198e-12	3.80231e-10
Soltu.DM.07G025330	Soltu.DM.04G009040	-0.926449	8.33312e-11	3.22064e-09
Soltu.DM.07G025330	Soltu.DM.08G028670	0.97694	3.03758e-16	1.52618e-13
Soltu.DM.07G025330	Soltu.DM.11G012170	-0.923025	1.35269e-10	4.79894e-09
Soltu.DM.07G025330	Soltu.DM.11G002410	0.952666	7.39379e-13	7.08508e-11
Soltu.DM.07G025330	Soltu.DM.03G022810	0.983016	1.08032e-17	9.56341e-15
Soltu.DM.07G025330	Soltu.DM.03G034580	0.92589	9.03371e-11	3.42728e-09
Soltu.DM.07G025330	Soltu.DM.04G022860	0.957226	2.47856e-13	2.9348e-11
Soltu.DM.07G025330	Soltu.DM.04G035960	0.966448	1.78952e-14	3.69634e-12
Soltu.DM.07G025330	Soltu.DM.09G002710	0.916532	3.19629e-10	9.67736e-09
Soltu.DM.07G025330	Soltu.DM.10G025490	-0.927176	7.49707e-11	2.94031e-09
Soltu.DM.07G025330	Soltu.DM.11G007280	0.916749	3.10927e-10	9.4912e-09
Soltu.DM.07G026970	Soltu.DM.01G022390	0.907031	1.00003e-09	2.59282e-08
Soltu.DM.07G026970	Soltu.DM.01G031880	0.945652	3.27072e-12	2.32537e-10
Soltu.DM.07G026970	Soltu.DM.01G032810	0.965707	2.26761e-14	4.34585e-12
Soltu.DM.07G026970	Soltu.DM.01G047000	0.922692	1.41609e-10	4.95819e-09
Soltu.DM.07G026970	Soltu.DM.02G010760	0.923991	1.18248e-10	4.29343e-09
Soltu.DM.07G026970	Soltu.DM.03G009170	0.91002	7.08085e-10	1.93294e-08
Soltu.DM.07G026970	Soltu.DM.03G009770	0.952879	7.04219e-13	6.85415e-11
Soltu.DM.07G026970	Soltu.DM.09G010080	0.936833	1.64092e-11	8.40348e-10
Soltu.DM.07G026970	Soltu.DM.09G031500	0.935994	1.8896e-11	9.49621e-10
Soltu.DM.07G026970	Soltu.DM.03G025330	0.925203	9.96596e-11	3.73522e-09
Soltu.DM.07G026970	Soltu.DM.03G025430	0.941925	6.66765e-12	4.18495e-10
Soltu.DM.07G026970	Soltu.DM.03G025440	0.926397	8.39683e-11	3.23853e-09
Soltu.DM.07G026970	Soltu.DM.03G025470	0.943394	5.06422e-12	3.31492e-10
Soltu.DM.07G026970	Soltu.DM.04G022680	0.930181	4.7835e-11	2.04897e-09
Soltu.DM.07G026970	Soltu.DM.05G013210	0.928328	6.32525e-11	2.55623e-09
Soltu.DM.07G026970	Soltu.DM.11G007270	0.908426	8.52411e-10	2.25731e-08
Soltu.DM.07G026970	Soltu.DM.11G007280	0.925521	9.52375e-11	3.60583e-09
Soltu.DM.07G027240	Soltu.DM.07G021820	0.932772	3.19442e-11	1.45194e-09
Soltu.DM.08G002010	Soltu.DM.07G021820	0.902227	1.70106e-09	4.05419e-08
Soltu.DM.08G002010	Soltu.DM.11G026060	0.946281	2.88643e-12	2.10426e-10
Soltu.DM.08G002700	Soltu.DM.09G024250	0.901255	1.88786e-09	4.3979e-08
Soltu.DM.08G004140	Soltu.DM.01G041520	0.920861	1.81613e-10	6.07226e-09
Soltu.DM.08G004140	Soltu.DM.05G025250	0.902873	1.58643e-09	3.84007e-08
Soltu.DM.08G004140	Soltu.DM.11G026060	0.938739	1.18181e-11	6.51925e-10
Soltu.DM.08G013580	Soltu.DM.01G022390	0.921849	1.58919e-10	5.44071e-09
Soltu.DM.08G013580	Soltu.DM.01G032810	0.935463	2.06405e-11	1.0205e-09
Soltu.DM.08G013580	Soltu.DM.01G047000	0.903162	1.53738e-09	3.74617e-08
Soltu.DM.08G013580	Soltu.DM.02G010760	0.910975	6.32568e-10	1.76303e-08
Soltu.DM.08G013580	Soltu.DM.03G004240	0.942638	5.83979e-12	3.75075e-10
Soltu.DM.08G013580	Soltu.DM.03G009770	0.930079	4.85838e-11	2.07626e-09
Soltu.DM.08G013580	Soltu.DM.05G025250	0.904784	1.28654e-09	3.24515e-08
Soltu.DM.08G013580	Soltu.DM.08G028670	0.914483	4.133e-10	1.21956e-08
Soltu.DM.08G013580	Soltu.DM.11G002410	0.942259	6.26694e-12	3.96267e-10
Soltu.DM.08G013580	Soltu.DM.03G025330	0.92915	5.59288e-11	2.3208e-09
Soltu.DM.08G013580	Soltu.DM.03G025470	0.965772	2.22156e-14	4.30196e-12
Soltu.DM.08G013580	Soltu.DM.04G022680	0.920541	1.89569e-10	6.30428e-09
Soltu.DM.08G013580	Soltu.DM.04G022860	0.920916	1.80275e-10	6.03841e-09
Soltu.DM.08G013580	Soltu.DM.09G002710	0.902252	1.69658e-09	4.05391e-08
Soltu.DM.08G013580	Soltu.DM.11G007260	0.914006	4.3842e-10	1.27547e-08
Soltu.DM.08G013580	Soltu.DM.11G007270	0.937941	1.35757e-11	7.25206e-10
Soltu.DM.08G013580	Soltu.DM.11G007280	0.932483	3.34426e-11	1.50897e-09
Soltu.DM.08G022000	Soltu.DM.01G038050	0.917121	2.9652e-10	9.15666e-09
Soltu.DM.08G022630	Soltu.DM.08G015940	0.944259	4.29325e-12	2.94421e-10
Soltu.DM.08G022630	Soltu.DM.01G031880	0.910491	6.69892e-10	1.85317e-08
Soltu.DM.08G022630	Soltu.DM.01G047000	0.941456	7.26731e-12	4.42948e-10
Soltu.DM.08G022630	Soltu.DM.02G015770	0.965801	2.20157e-14	4.30196e-12
Soltu.DM.08G022630	Soltu.DM.03G005050	0.957882	2.09728e-13	2.58201e-11
Soltu.DM.08G022630	Soltu.DM.03G009170	0.961532	7.87055e-14	1.18954e-11
Soltu.DM.08G022630	Soltu.DM.03G026240	0.941804	6.8176e-12	4.23877e-10
Soltu.DM.08G022630	Soltu.DM.09G001890	0.92287	1.38187e-10	4.87458e-09
Soltu.DM.08G022630	Soltu.DM.09G010080	0.924953	1.03262e-10	3.84256e-09
Soltu.DM.08G022630	Soltu.DM.03G025430	0.954643	4.66697e-13	4.82346e-11
Soltu.DM.08G022630	Soltu.DM.03G025440	0.973878	1.18006e-15	4.66753e-13
Soltu.DM.08G022630	Soltu.DM.04G022680	0.966848	1.57115e-14	3.47307e-12
Soltu.DM.08G022630	Soltu.DM.05G013210	0.919031	2.31521e-10	7.44633e-09
Soltu.DM.08G024150	Soltu.DM.03G022970	0.925315	9.80778e-11	3.69831e-09
Soltu.DM.08G024150	Soltu.DM.02G018220	0.911256	6.11744e-10	1.72047e-08
Soltu.DM.08G024160	Soltu.DM.01G003440	0.95855	1.76466e-13	2.26242e-11
Soltu.DM.08G024160	Soltu.DM.03G022970	0.983344	8.73248e-18	8.11684e-15
Soltu.DM.08G024160	Soltu.DM.03G025950	0.951755	9.07914e-13	8.35551e-11
Soltu.DM.08G024160	Soltu.DM.10G002080	0.937563	1.44891e-11	7.65754e-10
Soltu.DM.08G029680	Soltu.DM.01G045800	0.902205	1.70504e-09	4.05848e-08
Soltu.DM.08G029680	Soltu.DM.02G019240	0.960742	9.80577e-14	1.40223e-11
Soltu.DM.08G029680	Soltu.DM.05G004640	0.960972	9.20239e-14	1.3365e-11
Soltu.DM.08G029680	Soltu.DM.07G018570	0.902336	1.68113e-09	4.02216e-08
Soltu.DM.08G029680	Soltu.DM.09G025640	0.918629	2.44022e-10	7.78109e-09
Soltu.DM.08G029680	Soltu.DM.11G001180	0.903901	1.41803e-09	3.49155e-08
Soltu.DM.08G030120	Soltu.DM.08G019420	0.92098	1.78747e-10	5.99804e-09
Soltu.DM.09G002130	Soltu.DM.08G015940	0.911593	5.8764e-10	1.65686e-08
Soltu.DM.09G002130	Soltu.DM.01G031880	0.906965	1.00753e-09	2.60864e-08
Soltu.DM.09G002130	Soltu.DM.01G047000	0.941617	7.05671e-12	4.34385e-10
Soltu.DM.09G002130	Soltu.DM.02G015770	0.932444	3.36482e-11	1.51457e-09
Soltu.DM.09G002130	Soltu.DM.03G005050	0.937389	1.49254e-11	7.79389e-10
Soltu.DM.09G002130	Soltu.DM.03G009170	0.947851	2.09815e-12	1.70326e-10
Soltu.DM.09G002130	Soltu.DM.03G026240	0.934521	2.41005e-11	1.14879e-09
Soltu.DM.09G002130	Soltu.DM.09G001890	0.94191	6.68602e-12	4.18495e-10
Soltu.DM.09G002130	Soltu.DM.09G010080	0.91033	6.82685e-10	1.878e-08
Soltu.DM.09G002130	Soltu.DM.03G025430	0.950715	1.14246e-12	1.04623e-10
Soltu.DM.09G002130	Soltu.DM.03G025440	0.962777	5.51324e-14	8.99139e-12
Soltu.DM.09G002130	Soltu.DM.03G025470	0.904029	1.39822e-09	3.45651e-08
Soltu.DM.09G002130	Soltu.DM.04G022680	0.959846	1.25164e-13	1.73642e-11
Soltu.DM.09G002130	Soltu.DM.05G013210	0.926125	8.73351e-11	3.34529e-09
Soltu.DM.09G002130	Soltu.DM.08G027040	0.927116	7.56337e-11	2.94785e-09
Soltu.DM.09G002280	Soltu.DM.01G041460	0.903573	1.46998e-09	3.59565e-08
Soltu.DM.09G002280	Soltu.DM.02G019190	0.907203	9.80645e-10	2.55898e-08
Soltu.DM.09G002280	Soltu.DM.12G027420	0.9275	7.14858e-11	2.82749e-09
Soltu.DM.09G017360	Soltu.DM.04G005570	0.925093	1.01233e-10	3.7822e-09
Soltu.DM.09G017360	Soltu.DM.03G026240	0.922706	1.41348e-10	4.95819e-09
Soltu.DM.09G017360	Soltu.DM.12G005780	0.916861	3.06511e-10	9.4027e-09
Soltu.DM.09G017360	Soltu.DM.08G027040	0.916847	3.07061e-10	9.40406e-09
Soltu.DM.09G023050	Soltu.DM.01G038050	0.933996	2.62484e-11	1.23847e-09
Soltu.DM.10G003970	Soltu.DM.01G022390	0.915605	3.5934e-10	1.07225e-08
Soltu.DM.10G003970	Soltu.DM.01G032810	0.906447	1.06831e-09	2.75069e-08
Soltu.DM.10G003970	Soltu.DM.01G040860	0.916784	3.09543e-10	9.46449e-09
Soltu.DM.10G003970	Soltu.DM.02G010760	0.93528	2.1278e-11	1.03821e-09
Soltu.DM.10G003970	Soltu.DM.03G009770	0.93647	1.74447e-11	8.86055e-10
Soltu.DM.10G003970	Soltu.DM.08G028670	0.942178	6.36169e-12	4.00894e-10
Soltu.DM.10G003970	Soltu.DM.11G002410	0.956966	2.64628e-13	3.07465e-11
Soltu.DM.10G003970	Soltu.DM.03G025330	0.914161	4.30098e-10	1.25322e-08
Soltu.DM.10G003970	Soltu.DM.03G025470	0.900567	2.03105e-09	4.66138e-08
Soltu.DM.10G003970	Soltu.DM.04G022860	0.924243	1.1415e-10	4.16086e-09
Soltu.DM.10G003970	Soltu.DM.09G002710	0.927437	7.21544e-11	2.84788e-09
Soltu.DM.10G003970	Soltu.DM.11G007280	0.940796	8.1964e-12	4.85258e-10
Soltu.DM.10G015120	Soltu.DM.01G040860	0.94831	1.90798e-12	1.59772e-10
Soltu.DM.10G015120	Soltu.DM.03G009770	0.915824	3.49597e-10	1.04654e-08
Soltu.DM.10G015120	Soltu.DM.03G022680	-0.923143	1.33076e-10	4.74835e-09
Soltu.DM.10G015120	Soltu.DM.08G028670	0.940317	8.93563e-12	5.20732e-10
Soltu.DM.10G015120	Soltu.DM.03G022810	0.92129	1.7143e-10	5.79432e-09
Soltu.DM.10G015120	Soltu.DM.04G022860	0.902852	1.5899e-09	3.84346e-08
Soltu.DM.10G015120	Soltu.DM.04G035960	0.960983	9.17506e-14	1.3365e-11
Soltu.DM.10G015120	Soltu.DM.09G002710	0.943728	4.75248e-12	3.18948e-10
Soltu.DM.10G015120	Soltu.DM.11G007280	0.902986	1.56703e-09	3.80301e-08
Soltu.DM.10G015800	Soltu.DM.08G015940	0.927922	6.71766e-11	2.67986e-09
Soltu.DM.10G015800	Soltu.DM.01G047000	0.923158	1.32797e-10	4.7475e-09
Soltu.DM.10G015800	Soltu.DM.02G015770	0.956366	3.07281e-13	3.50451e-11
Soltu.DM.10G015800	Soltu.DM.03G005050	0.933052	3.05521e-11	1.39892e-09
Soltu.DM.10G015800	Soltu.DM.03G009170	0.943846	4.64689e-12	3.12992e-10
Soltu.DM.10G015800	Soltu.DM.09G010080	0.922965	1.36376e-10	4.81983e-09
Soltu.DM.10G015800	Soltu.DM.03G025440	0.916575	3.17877e-10	9.64003e-09
Soltu.DM.10G015800	Soltu.DM.04G022680	0.911041	6.27569e-10	1.75313e-08
Soltu.DM.10G019890	Soltu.DM.08G015940	0.920222	1.97815e-10	6.53175e-09
Soltu.DM.10G019890	Soltu.DM.02G014900	0.928143	6.50165e-11	2.61049e-09
Soltu.DM.10G019890	Soltu.DM.03G005050	0.910576	6.63138e-10	1.83722e-08
Soltu.DM.10G019890	Soltu.DM.03G026240	0.911752	5.76517e-10	1.63127e-08
Soltu.DM.10G019890	Soltu.DM.04G005020	0.923543	1.25891e-10	4.5355e-09
Soltu.DM.11G009850	Soltu.DM.09G031500	0.91322	4.82732e-10	1.38274e-08
Soltu.DM.11G009850	Soltu.DM.07G019310	0.901308	1.87729e-09	4.37897e-08
Soltu.DM.11G016910	Soltu.DM.01G038050	0.904673	1.30241e-09	3.26999e-08
Soltu.DM.11G016910	Soltu.DM.09G018860	0.910886	6.39264e-10	1.77903e-08
Soltu.DM.11G016910	Soltu.DM.10G025490	0.956411	3.03864e-13	3.48694e-11
Soltu.DM.11G022960	Soltu.DM.12G026540	0.903673	1.45388e-09	3.57036e-08
Soltu.DM.11G022960	Soltu.DM.01G022390	0.950524	1.19107e-12	1.08539e-10
Soltu.DM.11G022960	Soltu.DM.01G040860	0.916222	3.32468e-10	9.9848e-09
Soltu.DM.11G022960	Soltu.DM.02G010760	0.92225	1.50457e-10	5.19888e-09
Soltu.DM.11G022960	Soltu.DM.04G009040	-0.908369	8.58106e-10	2.26916e-08
Soltu.DM.11G022960	Soltu.DM.08G028670	0.972009	2.5024e-15	8.02064e-13
Soltu.DM.11G022960	Soltu.DM.11G012170	-0.900901	1.96022e-09	4.5324e-08
Soltu.DM.11G022960	Soltu.DM.11G002410	0.944172	4.36516e-12	2.96162e-10
Soltu.DM.11G022960	Soltu.DM.03G022810	0.987401	4.12739e-19	1.2788e-15
Soltu.DM.11G022960	Soltu.DM.04G022860	0.949776	1.39997e-12	1.22761e-10
Soltu.DM.11G022960	Soltu.DM.04G035960	0.973089	1.63097e-15	5.94503e-13
Soltu.DM.11G022960	Soltu.DM.09G002710	0.937248	1.52904e-11	7.91781e-10
Soltu.DM.11G022960	Soltu.DM.10G025490	-0.919646	2.13522e-10	6.98834e-09
Soltu.DM.11G022960	Soltu.DM.11G007280	0.910111	7.0054e-10	1.91797e-08
Soltu.DM.11G024670	Soltu.DM.11G026060	0.919959	2.04848e-10	6.72815e-09
Soltu.DM.12G000540	Soltu.DM.04G005570	0.931104	4.14988e-11	1.81009e-09
Soltu.DM.12G000540	Soltu.DM.09G001890	0.904645	1.30648e-09	3.26999e-08
Soltu.DM.12G000540	Soltu.DM.08G027040	0.911204	6.15573e-10	1.72863e-08
Soltu.DM.12G002760	Soltu.DM.01G022390	0.913911	4.43545e-10	1.28836e-08
Soltu.DM.12G002760	Soltu.DM.04G022860	0.901116	1.91599e-09	4.45229e-08
Soltu.DM.12G002760	Soltu.DM.11G007260	0.901343	1.87019e-09	4.3787e-08
Soltu.DM.12G003910	Soltu.DM.12G026540	0.904616	1.31065e-09	3.27046e-08
Soltu.DM.12G022050	Soltu.DM.01G003440	0.913074	4.91394e-10	1.40539e-08
Soltu.DM.12G022050	Soltu.DM.03G022680	0.935423	2.07789e-11	1.0219e-09
Soltu.DM.12G022050	Soltu.DM.02G018220	0.93986	9.69778e-12	5.46876e-10
Soltu.DM.12G022050	Soltu.DM.07G014090	0.911717	5.78934e-10	1.63562e-08
Soltu.DM.12G027800	Soltu.DM.01G002130	0.949958	1.34611e-12	1.19733e-10
Soltu.DM.12G027800	Soltu.DM.01G045800	0.944783	3.87857e-12	2.69626e-10
Soltu.DM.12G027800	Soltu.DM.02G033170	0.906854	1.02033e-09	2.63443e-08
Soltu.DM.12G027800	Soltu.DM.07G005240	0.92963	5.20214e-11	2.19652e-09
Soltu.DM.12G027800	Soltu.DM.07G023160	0.918644	2.43537e-10	7.77895e-09
Soltu.DM.12G027800	Soltu.DM.10G002080	0.902625	1.62949e-09	3.91879e-08
Soltu.DM.12G029330	Soltu.DM.01G002130	0.912992	4.9631e-10	1.41727e-08
Soltu.DM.12G029330	Soltu.DM.01G003440	0.908467	8.48404e-10	2.25634e-08
Soltu.DM.12G029330	Soltu.DM.01G045800	0.902661	1.62324e-09	3.90882e-08
Soltu.DM.12G029330	Soltu.DM.02G033170	0.914411	4.17025e-10	1.22666e-08
Soltu.DM.12G029330	Soltu.DM.06G009380	0.924735	1.0651e-10	3.92084e-09
Soltu.DM.12G029330	Soltu.DM.07G014090	0.919137	2.28341e-10	7.38238e-09
Soltu.DM.12G029960	Soltu.DM.08G015940	0.924828	1.05105e-10	3.88448e-09
Soltu.DM.12G029960	Soltu.DM.01G022390	0.929491	5.31287e-11	2.22949e-09
Soltu.DM.12G029960	Soltu.DM.01G031880	0.971668	2.85377e-15	8.73698e-13
Soltu.DM.12G029960	Soltu.DM.01G032810	0.962792	5.48821e-14	8.99139e-12
Soltu.DM.12G029960	Soltu.DM.01G047000	0.980302	5.44937e-17	3.8963e-14
Soltu.DM.12G029960	Soltu.DM.02G010760	0.919875	2.07141e-10	6.79145e-09
Soltu.DM.12G029960	Soltu.DM.02G015770	0.952685	7.36121e-13	7.08508e-11
Soltu.DM.12G029960	Soltu.DM.03G004240	0.93485	2.28378e-11	1.09988e-09
Soltu.DM.12G029960	Soltu.DM.03G005050	0.948412	1.86783e-12	1.57118e-10
Soltu.DM.12G029960	Soltu.DM.03G009170	0.982563	1.44021e-17	1.21698e-14
Soltu.DM.12G029960	Soltu.DM.03G009770	0.934144	2.56283e-11	1.21538e-09
Soltu.DM.12G029960	Soltu.DM.03G026240	0.928302	6.34993e-11	2.56063e-09
Soltu.DM.12G029960	Soltu.DM.05G025250	0.948824	1.71327e-12	1.46099e-10
Soltu.DM.12G029960	Soltu.DM.09G010080	0.97603	4.63004e-16	2.15181e-13
Soltu.DM.12G029960	Soltu.DM.09G031500	0.955712	3.60839e-13	3.99286e-11
Soltu.DM.12G029960	Soltu.DM.03G001330	0.910098	7.01644e-10	1.91817e-08
Soltu.DM.12G029960	Soltu.DM.03G025330	0.94344	5.02039e-12	3.2997e-10
Soltu.DM.12G029960	Soltu.DM.03G025430	0.974462	9.22889e-16	3.98989e-13
Soltu.DM.12G029960	Soltu.DM.03G025440	0.968927	7.78248e-15	2.00939e-12
Soltu.DM.12G029960	Soltu.DM.03G025470	0.98159	2.60608e-17	1.93788e-14
Soltu.DM.12G029960	Soltu.DM.04G022680	0.98004	6.29588e-17	4.18002e-14
Soltu.DM.12G029960	Soltu.DM.04G022860	0.918473	2.49049e-10	7.90073e-09
Soltu.DM.12G029960	Soltu.DM.05G013210	0.940637	8.435e-12	4.96223e-10
Soltu.DM.12G029960	Soltu.DM.11G007260	0.940951	7.96962e-12	4.76383e-10
Soltu.DM.12G029960	Soltu.DM.11G007270	0.959859	1.24749e-13	1.73642e-11
Soltu.DM.12G029960	Soltu.DM.11G007280	0.941573	7.11396e-12	4.35028e-10
