# Supplementary material for: Transcriptome-metabolome integration reveals MYB/WRKY-RGA network and phenylalanine metabolism in potato late blight resistance
Source: Research Square preprint supplement (doi:10.21203/rs.3.rs-8142072/v1), 2025-12-04
Supplement: Supplementary file 2 [file 57fe365a9b50a512902edbf2.xlsx]

## Sheet: Sheet1
Supplementary Table S6 Classification and detailed information of 3583 metabolites in the metabolome
ID	Mode	Compounds	Class I	Class II	Formula	cpd_ID
ME0049106	T3_positive	Cyclopamine	Alkaloids	Terpenoid alkaloids	C27H41NO2	C10798
ME0137868	T3_positive	Daphnin	Lignans and Coumarins	Coumarins	C15H16O9	C01421
ME0127974	T3_positive	N-Feruloyl dopamine, trans-	Alkaloids	Alkaloids	C18H19NO5	-
ME0003823	T3_positive	m-Aminobenzoic acid	Benzene and substituted derivatives	Benzene and substituted derivatives	C7H7NO2	-
ME0170030	T3_positive	Zearalenone	Others	Ketone compounds	C18H22O5	C09981
ME0006078	T3_positive	Benzyl alcohol	Benzene and substituted derivatives	Benzene and substituted derivatives	C7H8O	C03485
Zmhn002301	T3_positive	4-O-beta-D-glucosyl-4-coumaric acid	Organic acids	Organic acids	C15H18O8	C04415
ME0138533	T3_positive	Isorhamnetin 3-O-alpha-rhamnopyranosyl-(1-2)-beta-galactopyranoside	Flavonoids	Flavones	C28H32O16	-
ME0014155	T3_positive	3-Methylglutaconic acid	Organic acids	Organic acids	C6H8O4	-
MEDN1606	T3_positive	N-Acetylarylamine	Benzene and substituted derivatives	Benzene and substituted derivatives	C8H9NO	C07565
ME0149468	T3_positive	Ganoderic acid H	Lipids	Free fatty acids	C32H44O9	-
ME0138675	T3_positive	3''-O-L-Rhamnopyranosylastragalin	Flavonoids	Flavones	C27H30O15	-
ME0052505	T3_positive	Ecdysone	Organic acids	Organic acids	C27H44O6	C00477
ME0126851	T3_positive	3-(3-methylbut-2-en-1-yl)-3H-purin-6-amine	Heterocyclic compounds	Heterocyclic compounds	C10H13N5	C08435
ME0126804	T3_positive	3',5'-Cyclic dtmp	Organic acids	Organic acids	C10H13N2O7P	-
ME0010721	T3_positive	(-)-Perillyl alcohol	Alcohol and amines	Alcohols	C10H16O	C02452
ME0139542	T3_positive	Vincetoxicoside A	Flavonoids	Flavones	C27H30O16	-
ME0125208	T3_positive	Monocrotaline	Alkaloids	Pyrrole alkaloids	C16H23NO6	-
ME0103360	T3_positive	3',5'-Cyclic IMP	Nucleotides and derivatives	Nucleotides and derivatives	C10H11N4O7P	C00943
pme2617	T3_positive	L-methionine sulfoxide	Amino acids and derivatives	Amino acids and derivatives	C5H11NO3S	C02989
ME0108796	T3_positive	N-Heptanoylhomoserine lactone	Others	Lactones	C11H19NO3	-
ME0104699	T3_positive	Spermidic acid	Organic acids	Organic acids	C7H13NO4	-
ME0105748	T3_positive	Arg-Ser	Amino acids and derivatives	Amino acids and derivatives	C9H19N5O4	-
ME0120325	T3_positive	4-Butyl-gamma-butyrolactone	Others	Lactones	C8H14O2	-
ME0168654	T3_positive	7(S),17(S)-dihydroxy-8(E),10(Z),13(Z),15(E),19(Z)-Docosapentaenoic Acid	Fatty acyl	Others	C22H34O4	-
ME0103634	T3_positive	Nadide	Nucleotides and derivatives	Nucleotides and derivatives	C21H27N7O14P2	C00003
ME0053831	T3_positive	Hecogenin	Steroids	Steroidal saponins	C27H42O4	C08902
ME0124226	T3_positive	Garcinone D	Flavonoids	Other Flavonoids	C24H28O7	-
ME0004175	T3_positive	3-Phenylpropanal	Benzene and substituted derivatives	Benzene and substituted derivatives	C9H10O	-
ME0110866	T3_positive	5-Acetylamino-6-amino-3-methyluracil	Heterocyclic compounds	Heterocyclic compounds	C7H10N4O3	C16366
ME0015643	T3_positive	Alloxanthin	Alcohol and amines	Alcohols	C40H52O2	-
ME0146348	T3_positive	Asp-His	Amino acids and derivatives	Amino acids and derivatives	C10H14N4O5	-
MEDN0589	T3_positive	Cyclamic acid	Organic acids	Organic acids	C6H13NO3S	C02824
ME0052877	T3_positive	2-trans,6-trans-Farnesal	Others	Aldehyde compounds	C15H24O	C03461
MEDP1799	T3_positive	Quinaldic acid	Organic acids	Organic acids	C10H7NO2	C06325
ME0014589	T3_positive	(+/-)5,6-EET Methyl Ester	Lipids	Free fatty acids	C21H34O3	-
ME0110314	T3_positive	Tyrosyltyrosine	Amino acids and derivatives	Amino acids and derivatives	C18H20N2O5	-
ME0124225	T3_positive	Garcinone C	Others	Ketone compounds	C23H26O7	-
ME0012354	T3_positive	(+/-)14(15)-Epetre methyl ester	Lipids	Free fatty acids	C21H34O3	-
ME0106789	T3_positive	gamma-Glutamyltyrosine	Amino acids and derivatives	Amino acids and derivatives	C14H18N2O6	-
MEDN0851	T3_positive	Indolepyruvate	Organic acids	Organic acids	C11H9NO3	C00331
ME0010965	T3_positive	Secalciferol	Alcohol and amines	Alcohols	C27H44O3	-
ME0158729	T3_positive	Tyrosyl-tryptophan	Amino acids and derivatives	Amino acids and derivatives	C20H21N3O4	-
ME0108512	T3_positive	N-[(3s)-2-Oxotetrahydrofuran-3-Yl]hexanamide	Others	Lactones	C10H17NO3	C21197
ME0052787	T3_positive	Limonin	Terpenoids	Triterpene	C26H30O8	C03514
ME0011852	T3_positive	1,2-Didecanoyl-sn-glycero-3-phosphocholine	Glycerophospholipids	PC	C28H56NO8P	-
ME0108024	T3_positive	Lys-Trp-Lys	Amino acids and derivatives	Amino acids and derivatives	C23H36N6O4	-
ME0152081	T3_positive	Lacto-N-triaose	Others	Saccharides	C20H35NO16	-
ME0124325	T3_positive	Huperzine b	Alkaloids	Alkaloids	C16H20N2O	C09866
ME0114927	T3_positive	Metamfepramone	Benzene and substituted derivatives	Benzene and substituted derivatives	C11H15NO	-
ME0115736	T3_positive	(-)-Salsoline	Heterocyclic compounds	Heterocyclic compounds	C11H15NO2	C09640
ME0000440	T3_positive	Seneciphylline	Alkaloids	Pyrrole alkaloids	C18H23NO5	C10391
ME0000153	T3_positive	Bicuculline	Alkaloids	Isoquinoline alkaloids	C20H17NO6	C09364
ME0150595	T3_positive	Gly-Pro-Glu	Amino acids and derivatives	Amino acids and derivatives	C12H19N3O6	-
ME0012312	T3_positive	9s,13r-12-Oxophytodienoic Acid	Lipids	Free fatty acids	C18H28O3	-
ME0012269	T3_positive	13(S)-Hydroperoxylinolenic acid	Lipids	Free fatty acids	C18H30O4	C04785
ME0108601	T3_positive	2-Amino-6-ureidohexanoic acid	Amino acids and derivatives	Amino acids and derivatives	C7H15N3O3	-
ME0009489	T3_positive	Plumbagin	Quinones	Quinones	C11H8O3	-
ME0053722	T3_positive	Glycerol trihexanoate	Glycerolipids	TG	C21H38O6	-
MEDN0029	T3_positive	4-Hydroxyphenylpyruvic acid	Benzene and substituted derivatives	Benzene and substituted derivatives	C9H8O4	C01179
ME0061828	T3_positive	Pinolenic Acid ethyl ester	Fatty acyl	Others	C20H34O2	-
ME0112074	T3_positive	2-Aminoacetophenone	Others	Ketone compounds	C8H9NO	-
ME0000003	T3_positive	Cinchonan-3,9-diol, 6'-methoxy-, (8alpha,9R)-	Alkaloids	Alkaloids	C20H24N2O3	C07344
ME0109322	T3_positive	Prolyl-leucyl-glycine	Amino acids and derivatives	Amino acids and derivatives	C13H23N3O4	-
Lmhp002001	T3_positive	Val-Phe	Amino acids and derivatives	Amino acids and derivatives	C14H20N2O3	-
ME0125248	T3_positive	Myristicin	Lignans and Coumarins	Lignans	C11H12O3	C10480
ME0054002	T3_positive	Hyperforin	Heterocyclic compounds	Heterocyclic compounds	C35H52O4	C07608
MEDP1341	T3_positive	1-(9Z,12Z-octadecadienoyl)-sn-glycero-3-phosphocholine	Lipids	LPC	C26H50NO7P	-
ME0139382	T3_positive	Plantaginin	Heterocyclic compounds	Heterocyclic compounds	C21H20O11	C17056
ME0000427	T3_positive	Rinderine	Alkaloids	Pyrrole alkaloids	C15H25NO5	C10378
ME0168432	T3_positive	1,2-bis(heptanoylthio) Glycerophosphocholine	Glycerophospholipids	PC	C22H44NO6PS2	-
ME0109363	T3_positive	Prolylglutamic acid	Amino acids and derivatives	Amino acids and derivatives	C10H16N2O5	-
ME0168613	T3_positive	4-Methylumbelliferyl glucuronide	Benzene and substituted derivatives	Benzene and substituted derivatives	C16H16O9	C11584
ME0012218	T3_positive	12(S)-HpEPE	Lipids	Free fatty acids	C20H30O4	-
ME0114924	T3_positive	Di-N-acetylchitobiose	Others	Saccharides	C16H28N2O11	-
ME0009814	T3_positive	Sulfometuron-methyl	Benzene and substituted derivatives	Benzene and substituted derivatives	C15H16N4O5S	C10955
ME0106978	T3_positive	Glutamylproline	Amino acids and derivatives	Amino acids and derivatives	C10H16N2O5	-
ME0112752	T3_positive	Kynuramine	Alcohol and amines	Amines	C9H12N2O	-
ME0110215	T3_positive	Tyrosyl-prolyl-arginine	Amino acids and derivatives	Amino acids and derivatives	C20H30N6O5	-
ME0014451	T3_positive	4-Dihydroboldenone	Others	Ketone compounds	C19H28O2	-
FDATP00848	T3_positive	Tromethamine	Alcohol and amines	Alcohols	C4H11NO3	C07182
Lmhp001461	T3_positive	Pro-leu	Amino acids and derivatives	Amino acids and derivatives	C11H20N2O3	-
ME0124466	T3_positive	Isoeugenitol	Heterocyclic compounds	Heterocyclic compounds	C11H10O4	-
ME0123588	T3_positive	Dhurrin	Alkaloids	Phenolamine	C14H17NO7	C05143
ME0105602	T3_positive	Amastatin	Amino acids and derivatives	Amino acids and derivatives	C21H38N4O8	C01552
ME0148485	T3_positive	Isorescinnamine, dihydro-	Alkaloids	Alkaloids	C35H44N2O9	-
ME0000482	T3_positive	Leurocristine	Alkaloids	Alkaloids	C46H56N4O10	-
ME0005999	T3_positive	alpha-Hydroxyhippuric acid	Benzene and substituted derivatives	Benzene and substituted derivatives	C9H9NO4	-
ME0009430	T3_positive	Phenylpropiolic acid	Benzene and substituted derivatives	Benzene and substituted derivatives	C9H6O2	-
ME0131073	T3_positive	3-(2-Methoxyphenyl)propanoic acid	Organic acids	Organic acids	C10H12O3	-
ME0107840	T3_positive	Leucylproline	Amino acids and derivatives	Amino acids and derivatives	C11H20N2O3	-
ME0169501	T3_positive	Myricitrin	Flavonoids	Flavonols	C21H20O12	C10108
ME0062101	T3_positive	Plumieride	Terpenoids	Monoterpenoids	C21H26O12	C09797
ME0114738	T3_positive	Linamarin	Alkaloids	Alkaloids	C10H17NO6	C01594
ME0105537	T3_positive	dl-Alanyl-dl-leucine	Amino acids and derivatives	Amino acids and derivatives	C9H18N2O3	-
ME0124675	T3_positive	Limonene-1,2-epoxide	Others	Ketone compounds	C10H16O	C07271
ME0013571	T3_positive	Ethylmethylacetic acid	Organic acids	Organic acids	C5H10O2	C18319
ME0129933	T3_positive	1-O-trans-Cinnamoyl-beta-D-glucopyranose	Phenolic acids	Phenolic acids	C15H18O7	C04164
ME0137752	T3_positive	Coumestrol dimethyl ether	Heterocyclic compounds	Heterocyclic compounds	C17H12O5	-
ME0123887	T3_positive	Ethenodeoxyadenosine	Heterocyclic compounds	Heterocyclic compounds	C12H13N5O3	-
MEDN1876	T3_positive	Vanylglycol	Benzene and substituted derivatives	Benzene and substituted derivatives	C9H12O4	C05594
ME0106972	T3_positive	Glu-Met	Amino acids and derivatives	Amino acids and derivatives	C10H18N2O5S	-
ME0119718	T3_positive	3-Methyluric acid	Organic acids	Organic acids	C6H6N4O3	-
ME0004168	T3_positive	3-Phenoxypropionic acid	Benzene and substituted derivatives	Benzene and substituted derivatives	C9H10O3	-
ME0124076	T3_positive	Eugenitol	Heterocyclic compounds	Heterocyclic compounds	C11H10O4	-
ME0014514	T3_positive	4-Isopropylbenzyl alcohol	Alcohol and amines	Alcohols	C10H14O	C06576
ME0159255	T3_positive	Val-Asp	Amino acids and derivatives	Amino acids and derivatives	C9H16N2O5	-
MEDP0362	T3_positive	D-(+)-Neopterin	Alkaloids	Alkaloids	C9H11N5O4	C05926
ME0114558	T3_positive	Glucovanillin	Benzene and substituted derivatives	Benzene and substituted derivatives	C14H18O8	C19808|C75308
ME0154369	T3_positive	Neolinustatin	Alkaloids	Alkaloids	C17H29NO11	C08336
ME0119762	T3_positive	3-Pyridineacetic acid	Organic acids	Organic acids	C7H7NO2	-
ME0138125	T3_positive	(E)-Ethyl 3-(4-hydroxyphenyl)acrylate	Others	Lactones	C11H12O3	-
ME0126471	T3_positive	8-Demethyl-8-(dimethylamino)riboflavin	Heterocyclic compounds	Heterocyclic compounds	C18H23N5O6	C21647
ME0156048	T3_positive	Pro-Val-Gly	Amino acids and derivatives	Amino acids and derivatives	C12H21N3O4	-
ME0048964	T3_positive	Cnicine	Others	Lactones	C20H26O7	C09362
ME0155976	T3_positive	Pro-Pro-Gly	Amino acids and derivatives	Amino acids and derivatives	C12H19N3O4	-
ME0105204	T3_positive	4-Carboxyphenylglycine	Amino acids and derivatives	Amino acids and derivatives	C9H9NO4	-
MEDP1127	T3_positive	1-Acetylindole	Alkaloids	Plumerane	C10H9NO	-
ME0011639	T3_positive	(S)-Abscisic acid	Organic acids	Organic acids	C15H20O4	C06082
ME0112865	T3_positive	Isovalerophenone	Others	Ketone compounds	C11H14O	-
ME0013469	T3_positive	3-Carboxy-4-methyl-5-propyl-2-furanpropionic acid	Organic acids	Organic acids	C12H16O5	-
ME0000184	T3_positive	Cinchonine	Alkaloids	Alkaloids	C19H22N2O	-
MEDL00348	T3_positive	Asp-Tyr	Amino acids and derivatives	Amino acids and derivatives	C13H16N2O6	-
ME0000024	T3_positive	Gnoscopine	Alkaloids	Isoquinoline alkaloids	C22H23NO7	-
ME0118529	T3_positive	2-Ethylpyrazine	Alkaloids	Alkaloids	C6H8N2	-
ME0126418	T3_positive	Ramifenazone	Others	Ketone compounds	C14H19N3O	-
ME0105414	T3_positive	Acetoacetic acid	Organic acids	Organic acids	C4H6O3	C00164
ME0107165	T3_positive	Glycylglycylglycine	Amino acids and derivatives	Amino acids and derivatives	C6H11N3O4	-
ME0111271	T3_positive	4-(2-Pyridylazo)-N,N-dimethylaniline	Alkaloids	Pyridine alkaloids	C13H14N4	-
ME0000247	T3_positive	Ergocristine	Alkaloids	Alkaloids	C35H39N5O5	C09164
ME0112009	T3_positive	2,6-Dimethyl-4-hydroxybenzaldehyde	Benzene and substituted derivatives	Benzene and substituted derivatives	C9H10O2	-
ME0012149	T3_positive	11-Oxoursolic acid acetate	Others	Lactones	C32H48O5	-
MEDN0838	T3_positive	N-Methyl-D-aspartic acid	Amino acids and derivatives	Amino acids and derivatives	C5H9NO4	C12269
ME0004431	T3_positive	Michler's ketone	Benzene and substituted derivatives	Benzene and substituted derivatives	C17H20N2O	C19266
ME0144984	T3_positive	Alpha-Maltose	Others	Saccharides	C12H22O11	C00897
ME0139227	T3_positive	Oxyresveratrol	Heterocyclic compounds	Heterocyclic compounds	C14H12O4	-
ME0110250	T3_positive	Tyr-glu	Amino acids and derivatives	Amino acids and derivatives	C14H18N2O6	-
ME0144828	T3_positive	Ala-ile	Amino acids and derivatives	Amino acids and derivatives	C9H18N2O3	-
ME0113988	T3_positive	beta-D-Galp-(1->3)-D-GalpNAc	Others	Saccharides	C14H25NO11	C07278
ME0107946	T3_positive	Prolylproline	Amino acids and derivatives	Amino acids and derivatives	C10H16N2O3	-
MEDL02193	T3_positive	Methyl 4-hydroxycinnamate	Others	Lactones	C10H10O3	-
ME0106444	T3_positive	Dihydrofolic acid	Organic acids	Organic acids	C19H21N7O6	C00415
ME0115078	T3_positive	Paederoside	Terpenoids	Monoterpenoids	C18H22O11S	C09795
ME0110369	T3_positive	L-Arginine, L-valyl-L-threonyl-	Amino acids and derivatives	Amino acids and derivatives	C15H30N6O5	-
ME0107917	T3_positive	L-Name	Others	Lactones	C7H15N5O4	C04337
MEDP1754	T3_positive	Dimethyl fumarate	Phenolic acids	Phenolic acids	C6H8O4	-
ME0016017	T3_positive	Avocadyne	Others	Others	C17H32O3	-
ME0108764	T3_positive	Neopine	Benzene and substituted derivatives	Benzene and substituted derivatives	C18H21NO3	C09594
ME0127757	T3_positive	Aegeline	Alkaloids	Phenolamine	C18H19NO3	-
ME0127881	T3_positive	3',4'-Dimethoxy-2'-hydroxychalcone	Others	Ketone compounds	C17H16O4	-
ME0011930	T3_positive	1,2-Dimyristoyl-sn-glycero-3-phosphocholine	Glycerophospholipids	PC	C36H72NO8P	-
ME0102922	T3_positive	Tributyrin	Glycerolipids	TG	C15H26O6	C13870
ME0117390	T3_positive	2-(1-methyl-1H-imidazol-5-yl)acetic acid	Organic acids	Organic acids	C6H8N2O2	-
ME0139540	T3_positive	2-(3,4-dihydroxyphenyl)-5-hydroxy-3,7-bis[[(2S,3R,4R,5R,6S)-3,4,5-trihydroxy-6-methyloxan-2-yl]oxy]chromen-4-one	Flavonoids	Flavonols	C27H30O15	-
MADN0517	T3_positive	Thioisonicotinamide	Others	Others	C6H6N2S	-
ME0056883	T3_positive	Colfosceril palmitate	Glycerophospholipids	PC	C40H80NO8P	C00157
ME0012774	T3_positive	1-Eicosanoyl-sn-glycero-3-phosphocholine	Lipids	LPC	C28H58NO7P	C04230
ME0112039	T3_positive	Galbeta1,3GlcNAc	Others	Saccharides	C14H25NO11	C06372
MEDN0433	T3_positive	8-Hydroxy-2'-deoxyguanosine	Nucleotides and derivatives	Nucleotides and derivatives	C10H13N5O5	-
ME0103677	T3_positive	Toyocamycin	Nucleotides and derivatives	Nucleotides and derivatives	C12H13N5O4	-
ME0123812	T3_positive	Ellipticine	Alkaloids	Plumerane	C17H14N2	C09154
MEDL00365	T3_positive	Tyrosylleucine	Amino acids and derivatives	Amino acids and derivatives	C15H22N2O4	C73328
ME0112142	T3_positive	2'-Fucosyl-D-lactose	Others	Saccharides	C18H32O15	-
ME0000241	T3_positive	3-Hydroxy-8-methyl-8-azabicyclo[3.2.1]octane-2-carboxylic acid	Alkaloids	Tropan alkaloids	C9H15NO3	-
ME0003138	T3_positive	2-Hydroxybenzyl alcohol	Phenolic acids	Phenolic acids	C7H8O2	C02323
ME0115025	T3_positive	Oxoamide	Alcohol and amines	Amines	C10H12N2O2	-
ME0014995	T3_positive	6beta-Hydroxymethandrostenolone	Others	Ketone compounds	C20H28O3	-
ME0103367	T3_positive	3-Deaza-2'-deoxyadenosine	Nucleotides and derivatives	Nucleotides and derivatives	C11H14N4O3	-
ME0109110	T3_positive	2-[[2-[[2-[(2-Amino-3-phenylpropanoyl)amino]acetyl]amino]-3-phenylpropanoyl]amino]acetic acid	Amino acids and derivatives	Amino acids and derivatives	C22H26N4O5	-
ME0108922	T3_positive	Tiglylglycine	Amino acids and derivatives	Amino acids and derivatives	C7H11NO3	-
ME0001243	T3_positive	Urea, tetraphenyl-	Benzene and substituted derivatives	Benzene and substituted derivatives	C25H20N2O	-
ME0000337	T3_positive	(e)-2-[(2s,3s)-3-Ethyl-8-methoxy-1,2,3,4,6,7,12,12b-octahydroindolo[3,2-h]quinolizin-2-yl]-3-methoxyprop-2-enoic acid methyl ester	Alkaloids	Alkaloids	C23H30N2O4	-
ME0001296	T3_positive	1,2-Dimethoxybenzene	Benzene and substituted derivatives	Benzene and substituted derivatives	C8H10O2	-
ME0000464	T3_positive	Thebaine	Alkaloids	Isoquinoline alkaloids	C19H21NO3	C06173
ME0118362	T3_positive	2-(9h-Carbazol-9-yl)benzoic acid	Organic acids	Organic acids	C19H13NO2	-
ME0114515	T3_positive	Gentianose	Others	Saccharides	C18H32O16	C08239
ME0052343	T3_positive	Diethyl succinate	Others	Lactones	C8H14O4	-
ME0106455	T3_positive	(R)-Dimethyl 2-hydroxysuccinate	Organic acids	Organic acids	C6H10O5	-
ME0121842	T3_positive	7,8-Dimethyl-10-(2'-acetoxyethyl)isoalloxazine	Heterocyclic compounds	Heterocyclic compounds	C16H16N4O4	-
ME0003365	T3_positive	2-Propylphenol	Benzene and substituted derivatives	Benzene and substituted derivatives	C9H12O	-
MES-04-288g_N	T3_positive	Phenyl dihydrogen phosphate	Benzene and substituted derivatives	Benzene and substituted derivatives	C6H7O4P	C02734
ME0138679	T3_positive	Kaempferol-3-Rhamnoside-4''-Rhamnoside-7-Rhamnoside	Flavonoids	Flavones	C33H40O18	-
ME0000433	T3_positive	Rotundine	Alkaloids	Alkaloids	C21H25NO4	-
ME0000503	T3_positive	(-)-Tylocrebrine	Benzene and substituted derivatives	Benzene and substituted derivatives	C24H27NO4	-
ME0139541	T3_positive	3-[(2S,3R,4S,5S,6R)-4,5-dihydroxy-6-(hydroxymethyl)-3-[(2S,3R,4R,5R,6S)-3,4,5-trihydroxy-6-methyloxan-2-yl]oxyoxan-2-yl]oxy-2-(3,4-dihydroxyphenyl)-5-hydroxy-7-[(2S,3R,4R,5R,6S)-3,4,5-trihydroxy-6-methyloxan-2-yl]oxychromen-4-one	Flavonoids	Flavones	C33H40O20	-
ME0137905	T3_positive	Delphinidin 3-O-beta-D-sambubioside	Flavonoids	Anthocyanidins	C26H29O16+	C20491
ME0017148	T3_positive	cis-3-Hexenyl tiglate	Lipids	Free fatty acids	C11H18O2	-
ME0127920	T3_positive	2,5-Dihydroxycinnamic acid	Organic acids	Organic acids	C9H8O4	-
ME0115161	T3_positive	Polygodial	Terpenoids	Sesquiterpenoids	C15H22O2	C09712
ME0138674	T3_positive	kaempferol 3-O-[alpha-L-rhamnopyranosyl(1->2)-beta-D-glucopyranosyl]-7-O-alpha-L-rhamnopyranoside	Flavonoids	Flavonols	C33H40O19	-
ME0159299	T3_positive	Val-trp	Amino acids and derivatives	Amino acids and derivatives	C16H21N3O3	-
ME0014489	T3_positive	4-Hydroxybutyric acid	Organic acids	Organic acids	C4H8O3	C01991
ME0010655	T3_positive	Secoisolariciresinol diglucoside	Lignans and Coumarins	Lignans	C32H46O16	-
ME0137432	T3_positive	kaempferol 3-O-beta-D-galactopyranosyl-7-O-alpha-L-rhamnopyranoside	Flavonoids	Flavonols	C27H30O15	-
ME0157439	T3_positive	Tetrahydrofolic acid	Organic acids	Organic acids	C19H23N7O6	-
ME0168991	T3_positive	CYMARIN	Steroids	Cardiac glycoside	C30H44O9	-
ME0145584	T3_positive	Arg-Glu	Amino acids and derivatives	Amino acids and derivatives	C11H21N5O5	-
MEDN1403	T3_positive	10-Hydroxy-2-decenoic acid	Lipids	Free fatty acids	C10H18O3	-
ME0000112	T3_positive	9-Aminocamptothecin	Alkaloids	Quinoline alkaloids	C20H17N3O4	-
ME0000050	T3_positive	(S)-Scoulerine	Alkaloids	Isoquinoline alkaloids	C19H21NO4	C02106
ME0149874	T3_positive	Glutaminyl-arginine	Amino acids and derivatives	Amino acids and derivatives	C11H22N6O4	-
ME0000382	T3_positive	Ochrolifuanine A	Alkaloids	Alkaloids	C29H34N4	C09229
MEDN1401	T3_positive	5-Phenylpenta-2,4-dienoic acid	Organic acids	Organic acids	C11H10O2	-
ME0000275	T3_positive	Harman	Alkaloids	Alkaloids	C12H10N2	C09209
ME0105581	T3_positive	Alitame	Organic acids	Organic acids	C14H25N3O4S	-
ME0143974	T3_positive	7-Hydroxycoumarinyl-gamma-linolenate	Lipids	Free fatty acids	C27H34O4	-
pme3504	T3_positive	Ononin	Flavonoids	Isoflavones	C22H22O9	C10509
ME0112702	T3_positive	3',4'-Dimethoxyacetophenone	Others	Ketone compounds	C10H12O3	-
ME0012346	T3_positive	13(S)-HpOTrE(gamma)	Lipids	Free fatty acids	C18H30O4	-
ME0108879	T3_positive	N-omega-Hydroxy-L-arginine	Amino acids and derivatives	Amino acids and derivatives	C6H14N4O3	C05933
ME0061827	T3_positive	Pinolenic acid	Lipids	Free fatty acids	C18H30O2	-
ME0010749	T3_positive	(+)-7-iso-Jasmonic acid	Organic acids	Organic acids	C12H18O3	-
ME0108503	T3_positive	N,N-Dimethyl-L-histidine	Amino acids and derivatives	Amino acids and derivatives	C8H13N3O2	C04259
ME0151667	T3_positive	Ile-Gln	Amino acids and derivatives	Amino acids and derivatives	C11H21N3O4	-
MEDN1110	T3_positive	1,11-Undecanedicarboxylic acid	Lipids	Free fatty acids	C13H24O4	-
ME0122505	T3_positive	7-Methoxy-4H-chromen-4-one	Others	Ketone compounds	C10H8O3	-
ME0150227	T3_positive	Glu-Arg	Amino acids and derivatives	Amino acids and derivatives	C11H21N5O5	-
ME0168258	T3_positive	Dihydrorobinetin	Flavonoids	Flavones	C15H12O7	-
ME0000034	T3_positive	3-Hydroxyquinidine	Alkaloids	Alkaloids	C20H24N2O3	-
ME0124096	T3_positive	Famprofazone	Others	Ketone compounds	C24H31N3O	-
ME0106489	T3_positive	2,4-Diaminobutyric acid	Organic acids	Organic acids	C4H10N2O2	-
ME0000797	T3_positive	(R)-Benzyl 2-hydroxy-2-phenylacetate	Benzene and substituted derivatives	Benzene and substituted derivatives	C15H14O3	-
ME0150946	T3_positive	His-Gly-Thr	Amino acids and derivatives	Amino acids and derivatives	C12H19N5O5	-
ME0141122	T3_positive	Dioleoylphosphatidylcholine	Glycerophospholipids	PC	C44H84NO8P	-
ME0116019	T3_positive	3,4-Methylenedioxycinnamaldehyde	Others	Aldehyde compounds	C10H8O3	-
ME0130123	T3_positive	Dihydroquercetin	Others	Ketone compounds	C15H12O7	-
ME0129833	T3_positive	12a-Hydroxyrotenone	Others	Ketone compounds	C23H22O7	C10464
ME0108829	T3_positive	N-Methyl-L-proline	Amino acids and derivatives	Amino acids and derivatives	C6H11NO2	-
ME0005689	T3_positive	5-Hydroxymaltol	Others	Ketone compounds	C6H6O4	-
ME0118875	T3_positive	Pyridine-2-carbothioamide	Alcohol and amines	Amines	C6H6N2S	-
ME0169561	T3_positive	N-nonanoyl-L-Homoserine lactone	Others	Lactones	C13H23NO3	-
ME0108927	T3_positive	N-Tris(hydroxymethyl)methyl-2-aminoethanesulfonic acid	Organic acids	Organic acids	C6H15NO6S	C05353
ME0126512	T3_positive	Sapropterin	Heterocyclic compounds	Pteridines and derivatives	C9H15N5O3	C00272|C16118
ME0126135	T3_positive	Picolinamide	Alcohol and amines	Amines	C6H6N2O	C01950
ME0116893	T3_positive	1-Benzyl-4-hydroxy-5-oxo-2,5-dihydro-1H-pyrrole-3-carboxylic acid ethyl ester	Benzene and substituted derivatives	Benzene and substituted derivatives	C14H15NO4	-
MEDL01732	T3_positive	3-Isobutylhexahydropyrrolo[1,2-a]pyrazine-1,4-dione	Amino acids and derivatives	Amino acids and derivatives	C11H18N2O2	-
ME0105524	T3_positive	Ala-Lys	Amino acids and derivatives	Amino acids and derivatives	C9H19N3O3	-
ME0106984	T3_positive	Glutaconic acid	Organic acids	Organic acids	C5H6O4	C02214
ME0120587	T3_positive	Isomyristicin	Benzene and substituted derivatives	Benzene and substituted derivatives	C11H12O3	-
ME0113918	T3_positive	alpha-Pyrrolidinopropiophenone	Others	Ketone compounds	C13H17NO	-
ME0114223	T3_positive	D-glucosamine 6-phosphate	Others	Saccharides	C6H14NO8P	C00352
ME0003591	T3_positive	(3,5-Dimethoxyphenyl)(4-methoxyphenyl)methanone	Benzene and substituted derivatives	Benzene and substituted derivatives	C16H16O4	-
ME0130180	T3_positive	6,7,3',4'-Tetrahydroxyflavone	Flavonoids	Flavones	C15H10O6	-
ME0115168	T3_positive	Primin	Others	Ketone compounds	C12H16O3	-
ME0130875	T3_positive	2-Methoxycinnamaldehyde	Phenolic acids	Phenolic acids	C10H10O2	-
ME0104504	T3_positive	2-Amino-3-phosphonopropionic acid	Organic acids	Organic acids	C3H8NO5P	C05672
ME0169544	T3_positive	omega-Aminoarginine	Amino acids and derivatives	Amino acids and derivatives	C6H15N5O2	-
ME0014757	T3_positive	5-Geranyloxy-7-methoxycoumarin	Lignans and Coumarins	Coumarins	C20H24O4	-
ME0007535	T3_positive	Maclurin	Flavonoids	Other Flavonoids	C13H10O6	C09951
ME0110229	T3_positive	H-Tyr-tyr-tyr-OH	Amino acids and derivatives	Amino acids and derivatives	C27H29N3O7	-
ME0111217	T3_positive	N-Methyldioctylamine	Alcohol and amines	Amines	C17H37N	-
MEDP0781	T3_positive	2-Undecanone	Others	Ketone compounds	C11H22O	C01875
ME0055509	T3_positive	Ostruthin	Lignans and Coumarins	Coumarins	C19H22O3	C09281
ME0144142	T3_positive	9-cis-Retinol	Alcohol and amines	Alcohols	C20H30O	C16682
ME0012822	T3_positive	Azelaoyl PAF	Glycerophospholipids	PA	C33H66NO9P	-
ME0115792	T3_positive	2-(1-methyl-1H-imidazol-4-yl)acetic acid	Organic acids	Organic acids	C6H8N2O2	C05828
ME0009160	T3_positive	Noroxycodone	Benzene and substituted derivatives	Benzene and substituted derivatives	C17H19NO4	-
MEDL02176	T3_positive	6-Methylcoumarin	Lignans and Coumarins	Coumarins	C10H8O2	-
ME0126336	T3_positive	Pyridoxamine phosphate	Organic acids	Organic acids	C8H13N2O5P	C00647
ME0054299	T3_positive	L-canavanine	Amino acids and derivatives	Amino acids and derivatives	C5H12N4O3	C00308
ME0106779	T3_positive	gamma-Glutamylphenylalanine	Amino acids and derivatives	Amino acids and derivatives	C14H18N2O5	-
ME0009857	T3_positive	Tenovin-1	Benzene and substituted derivatives	Benzene and substituted derivatives	C20H23N3O2S	-
ME0001218	T3_positive	Propylene glycol dibenzoate	Benzene and substituted derivatives	Benzene and substituted derivatives	C17H16O4	-
MEDL00414	T3_positive	D-Arabinose-5-phosphate	Others	Saccharides	C5H11O8P	C01112
ME0133171	T3_positive	3'-Methoxyflavone	Flavonoids	Flavones	C16H12O3	C20872
ME0108003	T3_positive	Lys-His	Amino acids and derivatives	Amino acids and derivatives	C12H21N5O3	-
ME0168622	T3_positive	4-Phenyl-1,2,3-thiadiazole	Benzene and substituted derivatives	Benzene and substituted derivatives	C8H6N2S	-
ME0114378	T3_positive	D-xylulose	Others	Saccharides	C5H10O5	-
MEDN1428	T3_positive	5Z,8Z,11Z,14Z-Eicosatetraenedioic acid	Lipids	Free fatty acids	C20H30O4	-
ME0158312	T3_positive	Trp-Trp	Amino acids and derivatives	Amino acids and derivatives	C22H22N4O3	-
ME0140162	T3_positive	4-hydroxy-3,5,5-trimethyl-4-[(1E)-3-oxobut-1-en-1-yl]cyclohex-2-en-1-one	Terpenoids	Monoterpenoids	C13H18O3	C04223
ME0102805	T3_positive	Thymol	Phenolic acids	Phenolic acids	C10H14O	C09908
ME0138962	T3_positive	Micromelin	Others	Lactones	C15H12O6	C09277
ME0106760	T3_positive	gamma-Glutamylalanine	Amino acids and derivatives	Amino acids and derivatives	C8H14N2O5	C03740
ME0139715	T3_positive	[(2R,3R,4S,5S,6R)-2-[(1R,2Z,3S,4R,5S)-2-(cyanomethylidene)-3-hydroxy-4,5-dimethoxycyclohexyl]oxy-4,5-dihydroxy-6-(hydroxymethyl)oxan-3-yl] (Z)-3-(4-hydroxy-3-methoxyphenyl)prop-2-enoate	Others	Lactones	C26H33NO12	-
ME0111826	T3_positive	1-Kestose	Others	Saccharides	C18H32O16	C03661
ME0011680	T3_positive	cis-4-Decen-1-ol	Alcohol and amines	Alcohols	C10H20O	-
ME0105167	T3_positive	FAPy-adenine	Heterocyclic compounds	Heterocyclic compounds	C5H7N5O	C06502
ME0153300	T3_positive	Madecassic acid	Terpenoids	Triterpene	C30H48O6	-
MEDL00572	T3_positive	1,3-Dicaffeoylquinic acid	Phenolic acids	Phenolic acids	C25H24O12	C10445
ME0111194	T3_positive	N-Butylaniline	Alcohol and amines	Polyamines	C10H15N	-
ME0110304	T3_positive	L-Tyrosyl-L-serine	Amino acids and derivatives	Amino acids and derivatives	C12H16N2O5	-
ME0109688	T3_positive	Ser-Ser	Amino acids and derivatives	Amino acids and derivatives	C6H12N2O5	-
ME0153885	T3_positive	Methionylvaline	Amino acids and derivatives	Amino acids and derivatives	C10H20N2O3S	-
ME0007471	T3_positive	Labetalol	Benzene and substituted derivatives	Benzene and substituted derivatives	C19H24N2O3	C07063|C74903
ME0138010	T3_positive	Neuronica	Others	Lactones	C14H14O3	-
ME0168670	T3_positive	9,12-Octadecadiynoic Acid	Lipids	Free fatty acids	C18H28O2	-
ME0103851	T3_positive	D-4-Hydroxyphenylglycine	Amino acids and derivatives	Amino acids and derivatives	C8H9NO3	C03493
ME0011596	T3_positive	(R)-8-Acetoxycarvotanacetone	Others	Ketone compounds	C12H18O3	-
ME0009433	T3_positive	Phenyltoloxamine	Benzene and substituted derivatives	Benzene and substituted derivatives	C17H21NO	-
ME0015937	T3_positive	Asclepin	Steroids	Cardiac glycoside	C31H42O10	C08849
ME0119848	T3_positive	4-(2-Hydroxyethyl)piperazin-1-ylethanesulphonic acid	Benzene and substituted derivatives	Benzene and substituted derivatives	C8H18N2O4S	-
ME0005288	T3_positive	4-Nitroso-N-phenylaniline	Benzene and substituted derivatives	Benzene and substituted derivatives	C12H10N2O	C19479
ME0106945	T3_positive	alpha-Glutamylaspartic acid	Amino acids and derivatives	Amino acids and derivatives	C9H14N2O7	-
ME0153228	T3_positive	Lys-Lys	Amino acids and derivatives	Amino acids and derivatives	C12H26N4O3	-
MEDL02714	T3_positive	3-Phosphoglyceric acid	Others	Saccharides	C3H7O7P	C00197
ME0063757	T3_positive	Taxusin	Terpenoids	Ditepenoids	C28H40O8	C20152
ME0107651	T3_positive	L-Allysine ethylene acetal	Amino acids and derivatives	Amino acids and derivatives	C8H15NO4	-
ME0139371	T3_positive	Pinosylvin	Others	Stilbene	C14H12O2	C01745
ME0152629	T3_positive	H-Leu-Trp-OH	Amino acids and derivatives	Amino acids and derivatives	C17H23N3O3	-
ME0137821	T3_positive	Cyanidin 3-sambubioside 5-glucoside	Flavonoids	Anthocyanidins	C32H39O20+	C20493
Lmhp001732	T3_positive	Pro-Phe	Amino acids and derivatives	Amino acids and derivatives	C14H18N2O3	-
MEDL00450	T3_positive	Arachidonic acid	Lipids	Free fatty acids	C20H32O2	C00219
ME0138770	T3_positive	Licochalcone a	Flavonoids	Chalcones	C21H22O4	-
ME0103327	T3_positive	2-Aminoadenosine	Nucleotides and derivatives	Nucleotides and derivatives	C10H14N6O4	C00939
ME0055282	T3_positive	Neotigogenin acetate	Steroids	Steroid	C29H46O4	-
ME0006306	T3_positive	Benzyl butyl phthalate	Benzene and substituted derivatives	Benzene and substituted derivatives	C19H20O4	-
ME0133725	T3_positive	4-Methylumbelliferyl acetate	Lignans and Coumarins	Coumarins	C12H10O4	C03837
ME0000181	T3_positive	Chelidonine	Alkaloids	Isoquinoline alkaloids	C20H19NO5	C12242
MEDP0167	T3_positive	Guanosine	Nucleotides and derivatives	Nucleotides and derivatives	C10H13N5O5	C00387
MEDN1562	T3_positive	Monobutyl phthalate	Others	Lactones	C12H14O4	-
MEDP0171	T3_positive	Inosine	Nucleotides and derivatives	Nucleotides and derivatives	C10H12N4O5	C00294
MEDP0081	T3_positive	Serotonin	Alkaloids	Plumerane	C10H12N2O	C00780
MEDL00009	T3_positive	L-Valine	Amino acids and derivatives	Amino acids and derivatives	C5H11NO2	C00183
MEDN0006	T3_positive	L-Tyrosine	Amino acids and derivatives	Amino acids and derivatives	C9H11NO3	C00082
ME0113144	T3_positive	4-O-Methyl-a-D-glucosyl-(1->2)-b-D-xylosyl-(1->4)-D-xylose	Others	Saccharides	C17H28O15	-
pmp000596	T3_positive	Quercetin-3-O-(2''-O-galactosyl)glucoside	Flavonoids	Flavonols	C27H30O17	-
ME0049038	T3_positive	Cortolone-3-glucuronide	Others	Ketone compounds	C27H42O11	-
MEDP0251	T3_positive	Trigonelline	Alkaloids	Pyridine alkaloids	C7H7NO2	C01004
MEDN0011	T3_positive	L-Glutamic acid	Amino acids and derivatives	Amino acids and derivatives	C5H9NO4	C00025
MEDL02688	T3_positive	p-Coumaroyltyramine	Alkaloids	Phenolamine	C17H17NO3	-
MEDL02217	T3_positive	Moupinamide	Alkaloids	Phenolamine	C18H19NO4	C02717
MEDP0022	T3_positive	L-Proline	Amino acids and derivatives	Amino acids and derivatives	C5H9NO2	C00148
MEDL02712	T3_positive	Calycanthoside	Lignans and Coumarins	Coumarins	C17H20O10	-
MEDP0054	T3_positive	Glutamine	Amino acids and derivatives	Amino acids and derivatives	C5H10N2O3	C00064
MEDP0453	T3_positive	Indole	Alkaloids	Plumerane	C8H7N	C00463
MEDP0507	T3_positive	2-Hydroxycinnamic acid	Phenolic acids	Phenolic acids	C9H8O3	C01772
ME0116854	T3_positive	1-Acetyl-2-methyl-1,2,3,4-tetrahydroquinoline	Heterocyclic compounds	Heterocyclic compounds	C12H15NO	-
ME0004452	T3_positive	4,4'-Oxybis(benzoylhydrazide)	Benzene and substituted derivatives	Benzene and substituted derivatives	C14H14N4O3	-
ME0112692	T3_positive	3,4,5-Trimethoxyphenyl 2,6-digalloylglucoside	Benzene and substituted derivatives	Benzene and substituted derivatives	C29H30O17	-
MEDL00809	T3_positive	Tryptamine	Alkaloids	Plumerane	C10H12N2	C00398
MEDP0025	T3_positive	L-Tryptophan	Amino acids and derivatives	Amino acids and derivatives	C11H12N2O2	C00078
MEDP0366	T3_positive	N,N-Dimethylformamide	Alkaloids	Alkaloids	C3H7NO	C03134
MEDN0455	T3_positive	Guanine	Nucleotides and derivatives	Nucleotides and derivatives	C5H5N5O	C00242
MEDP0160	T3_positive	Adenosine	Nucleotides and derivatives	Nucleotides and derivatives	C10H13N5O4	C00212
MEDL00575	T3_positive	L-Isoleucine	Amino acids and derivatives	Amino acids and derivatives	C6H13NO2	C00407
ME0010879	T3_positive	(1R,2R,4S,6R)-2,6-Fenchanediol 2-O-b-D-glucoside	Alcohol and amines	Alcohols	C16H28O7	-
MEDP0017	T3_positive	L-Histidine	Amino acids and derivatives	Amino acids and derivatives	C6H9N3O2	C00135
ME0168473	T3_positive	2',3',5'-triacetyl-5-Azacytidine	Others	Others	C14H18N4O8	-
MEDP1027	T3_positive	Maltol	Heterocyclic compounds	Heterocyclic compounds	C6H6O3	C11918
MEDP1647	T3_positive	2-Amino-1-phenylethanol	Alkaloids	Alkaloids	C8H11NO	C02735
MEDL00568	T3_positive	Hyperoside	Flavonoids	Flavonols	C21H20O12	C10073
MEDL02259	T3_positive	Caffeine	Alkaloids	Alkaloids	C8H10N4O2	C07481
MEDN0551	T3_positive	3-Indoleacrylic acid	Alkaloids	Plumerane	C11H9NO2	-
MEDN0151	T3_positive	Adenine	Nucleotides and derivatives	Nucleotides and derivatives	C5H5N5	C00147
MEDL02681	T3_positive	6-Deoxyfagomine	Alkaloids	Piperidine alkaloids	C6H13NO2	-
MEDL01737	T3_positive	5-Aminoimidazole ribonucleotide	Nucleotides and derivatives	Nucleotides and derivatives	C8H14N3O7P	C03373
MEDL02483	T3_positive	5-Hydroxytryptophol	Alkaloids	Plumerane	C10H11NO2	-
MEDP1031	T3_positive	1-Phenylethanol	Phenolic acids	Phenolic acids	C8H10O	C07112
ME0110047	T3_positive	Tropate	Organic acids	Organic acids	C9H10O3	C01456
ME0110910	T3_positive	Aminophylline	Alkaloids	Alkaloids	C16H24N10O4	-
ME0008809	T3_positive	N-Acetyltyramine	Phenolic acids	Phenolic acids	C10H13NO2	-
MEDL00355	T3_positive	Glu-Tyr	Amino acids and derivatives	Amino acids and derivatives	C14H18N2O6	-
MEDL02754	T3_positive	2,6-Dimethoxy-1,4-benzoquinone	Quinones	Quinones	C8H8O4	C10331
MEDP0125	T3_positive	Choline	Alkaloids	Alkaloids	C5H14NO+	C00114
MEDP0020	T3_positive	Methionine	Amino acids and derivatives	Amino acids and derivatives	C5H11NO2S	C00073
MEDP0646	T3_positive	2,3-Dihydrobenzofuran	Benzene and substituted derivatives	Benzene and substituted derivatives	C8H8O	-
MEDL01799	T3_positive	Isoscutellarein	Flavonoids	Flavones	C15H10O6	-
MEDN0562	T3_positive	Indole-3-carbinol	Alkaloids	Plumerane	C9H9NO	-
MEDP0395	T3_positive	Pipecolic acid	Alkaloids	Alkaloids	C6H11NO2	C00408
ME0009792	T3_positive	Sulfamerazine	Benzene and substituted derivatives	Benzene and substituted derivatives	C11H12N4O2S	-
MEDL01942	T3_positive	Dibutyl phthalate	Phenolic acids	Phenolic acids	C16H22O4	C14214
MEDP0085	T3_positive	Tyramine	Alkaloids	Alkaloids	C8H11NO	C00483
MEDL00391	T3_positive	LysoPE 16:0	Lipids	LPE	C21H44NO7P	-
MEDP0899	T3_positive	3-Methyladenine	Nucleotides and derivatives	Nucleotides and derivatives	C6H7N5	C00913
MEDL02023	T3_positive	Asparagine	Amino acids and derivatives	Amino acids and derivatives	C4H8N2O3	C00152
MEDN1015	T3_positive	Nicotinic acid	Others	Vitamin	C6H5NO2	C00253
MEDP1310	T3_positive	4-Hydroxy-l-tryptophan	Amino acids and derivatives	Amino acids and derivatives	C11H12N2O3	C21777
ME0144881	T3_positive	Allatostatin III	Amino acids and derivatives	Amino acids and derivatives	C42H62N10O12	-
MEDP0276	T3_positive	Indole-3-carboxaldehyde	Alkaloids	Plumerane	C9H7NO	C08493
MEDP0510	T3_positive	Carnitine C2:0	Fatty acyl	CAR	C9H17NO4	C02571
MEDN0101	T3_positive	Theobromine	Alkaloids	Alkaloids	C7H8N4O2	C07480
MEDL02180	T3_positive	Esculetin	Lignans and Coumarins	Coumarins	C9H6O4	C09263
MEDP1796	T3_positive	Perillyl alcohol	Terpenoids	Monoterpenoids	C10H16O	C02452
MEDL00586	T3_positive	Arginine	Amino acids and derivatives	Amino acids and derivatives	C6H14N4O2	C00062
MEDN0153	T3_positive	Adenosine monophosphate	Nucleotides and derivatives	Nucleotides and derivatives	C10H14N5O7P	C00020
ME0105949	T3_positive	Aspartylglutamate	Amino acids and derivatives	Amino acids and derivatives	C9H14N2O7	-
FDATN00292	T3_positive	Taxifolin	Flavonoids	Flavanonols	C15H12O7	C01617
MEDL02307	T3_positive	p-Coumaroylagmatine	Alkaloids	Phenolamine	C14H20N4O2	C04498
MEDL00063	T3_positive	4-Hydroxybenzaldehyde	Phenolic acids	Phenolic acids	C7H6O2	C00633
MEDL02347	T3_positive	L-Phenylalanine	Amino acids and derivatives	Amino acids and derivatives	C9H11NO2	C00079
MEDN1366	T3_positive	3,5-Dihydroxybenzoic acid	Organic acids	Organic acids	C7H6O4	-
MEDL00353	T3_positive	Glu-Leu	Amino acids and derivatives	Amino acids and derivatives	C11H20N2O5	-
MEDL01940	T3_positive	Feruloylputrescine	Alkaloids	Phenolamine	C14H20N2O3	-
MEDN0068	T3_positive	S-(5-Adenosy)-L-Homocysteine	Amino acids and derivatives	Amino acids and derivatives	C14H20N6O5S	C00021
MEDP0654	T3_positive	2-Phenylacetamide	Alkaloids	Alkaloids	C8H9NO	C02505
MEDL02742	T3_positive	Delphinidin 3-sambubioside	Flavonoids	Anthocyanidins	C26H29O16+	-
MEDL02050	T3_positive	Niacinamide	Others	Vitamin	C6H6N2O	C00153
MEDP1493	T3_positive	N6-Methyladenosine	Nucleotides and derivatives	Nucleotides and derivatives	C11H15N5O4	-
MEDP0862	T3_positive	3-Hydroxyphenylacetic acid	Phenolic acids	Phenolic acids	C8H8O3	C05593
MEDP0426	T3_positive	Xanthurenic acid	Organic acids	Organic acids	C10H7NO4	C02470
MEDP1122	T3_positive	1-Hexadecanoyl-sn-glycerol	Glycerolipids	DG	C19H38O4	-
ME0141195	T3_positive	1-[(3R)-1-(1-adamantylmethyl)-2,4-dioxo-5-phenyl-1,5-benzodiazepin-3-yl]-3-phenylurea	Benzene and substituted derivatives	Benzene and substituted derivatives	C33H34N4O3	-
MEDP0128	T3_positive	Diethanolamine	Alkaloids	Alkaloids	C4H11NO2	C06772
MEDP1667	T3_positive	Phe-Glu	Amino acids and derivatives	Amino acids and derivatives	C14H18N2O5	-
ME0063235	T3_positive	Pulegone	Terpenoids	Terpene	C10H16O	C09893
MEDP1660	T3_positive	Bis(2-ethylhexyl) adipate	Others	Lactones	C22H42O4	C14240
MEDP0338	T3_positive	LysoPC 16:0	Lipids	LPC	C24H50NO7P	C04230
MEDN1476	T3_positive	Allantoic acid	Organic acids	Organic acids	C4H8N4O4	C00499
MEDP0688	T3_positive	Benzophenone	Others	Aldehyde compounds	C13H10O	C06354
MEDP1068	T3_positive	1,2-Dioctanoyl-sn-glycero-3-phosphocholine	Glycerophospholipids	PC	C24H48NO8P	-
MEDL01887	T3_positive	2-Hydroxybenzaldehyde	Phenolic acids	Phenolic acids	C7H6O2	C06202
MEDL00388	T3_positive	Cathinone	Alkaloids	Alkaloids	C9H11NO	C08301
MEDN0163	T3_positive	Hypoxanthine	Nucleotides and derivatives	Nucleotides and derivatives	C5H4N4O	C00262
ME0055375	T3_positive	Nostoxanthin	Fatty acyl	Others	C40H56O4	-
MEDP0316	T3_positive	Homovanillic acid	Phenolic acids	Phenolic acids	C9H10O4	C05582
ME0157470	T3_positive	Thalicarpine	Alkaloids	Alkaloids	C41H48N2O8	C09655
ME0002643	T3_positive	2-amino-4-(3,4-dimethoxyphenyl)-7,7-dimethyl-5-oxo-5,6,7,8-tetrahydro-4H-chromene-3-carbonitrile	Benzene and substituted derivatives	Benzene and substituted derivatives	C20H22N2O4	-
MEDN0685	T3_positive	Undecanedioic acid	Lipids	Free fatty acids	C11H20O4	-
ME0119290	T3_positive	3-({5,6-Dimethylthieno[2,3-d]pyrimidin-4-yl}sulfanyl)propanoic acid	Organic acids	Organic acids	C11H12N2O2S2	-
MEDP1448	T3_positive	1-Stearoyl-sn-glycerol	Glycerolipids	MG	C21H42O4	-
MEDP1061	T3_positive	o-Tyrosine	Amino acids and derivatives	Amino acids and derivatives	C9H11NO3	-
ME0146600	T3_positive	Benzoyl cyanide	Benzene and substituted derivatives	Benzene and substituted derivatives	C8H5NO	C21329
ME0015599	T3_positive	Agavoside B	Steroids	Steroidal saponins	C39H62O14	-
ME0160340	T3_positive	2,2,6,6-Tetramethyl-1,3-dithiane-4-thione	Others	Ketone compounds	C8H14S3	-
MEDP1218	T3_positive	3-Amino-2-naphthoic acid	Alkaloids	Alkaloids	C11H9NO2	-
MEDN1539	T3_positive	Genipin	Terpenoids	Monoterpenoids	C11H14O5	C09780
MEDL00101	T3_positive	Sphinganine	Sphingolipids	SPH	C18H39NO2	C00836
MEDL02018	T3_positive	(2E)-Decenoyl-ACP	Amino acids and derivatives	Amino acids and derivatives	C6H11NO2	C03969
ME0144376	T3_positive	Adiantifoline	Alkaloids	Alkaloids	C42H50N2O9	C09323
MEDL02710	T3_positive	Indole-3-acetamide	Alkaloids	Plumerane	C10H10N2O	C02693
MEDL01879	T3_positive	Nootkatol	Terpenoids	Sesquiterpenoids	C15H24O	C17915
MEDP1685	T3_positive	Phytosphingosine	Lipids	Sphingolipids	C18H39NO3	C12144
MEDN1026	T3_positive	Biosone	Terpenoids	Triterpene	C30H46O4	C02283
ZINC42834223	T3_positive	Aristoloterpenate-I	Benzene and substituted derivatives	Benzene and substituted derivatives	C32H31NO8	-
MEDP1033	T3_positive	Benzaldehyde	Phenolic acids	Phenolic acids	C7H6O	C00261
ZINC95909704	T3_positive	Taxuspinanane J	Benzene and substituted derivatives	Benzene and substituted derivatives	C40H44O12	-
MEDP1180	T3_positive	1-Myristoyl-sn-glycero-3-phosphocholine	Lipids	LPC	C22H46NO7P	-
MEDL00977	T3_positive	(E,Z)-2-Amino-3,14-octadecadien-1-ol	Alcohol and amines	Alcohols	C18H35NO	-
ME0152831	T3_positive	Lycoflexine	Alkaloids	Alkaloids	C17H25NO2	C09879
MEDL01798	T3_positive	2-(((2-Ethylhexyl)oxy)carbonyl)benzoic acid	Phenolic acids	Phenolic acids	C16H22O4	C03343
ME0115024	T3_positive	Nitroglycerin	Glycerophospholipids	PA	C3H5N3O9	C07455
ME0159452	T3_positive	Zhebeinine	Alkaloids	Alkaloids	C27H45NO3	C17881
MEDL00971	T3_positive	L-Aspartic acid	Amino acids and derivatives	Amino acids and derivatives	C4H7NO4	C00049
ME0009385	T3_positive	Phenindione	Benzene and substituted derivatives	Benzene and substituted derivatives	C15H10O2	C07584
MEDL01892	T3_positive	3-Hydroxybenzoic acid	Benzene and substituted derivatives	Benzene and substituted derivatives	C7H6O3	C00587
MEDP0272	T3_positive	5-Hydroxyindoleacetic acid	Alkaloids	Plumerane	C10H9NO3	C05635
ME0153280	T3_positive	Lys-Trp	Amino acids and derivatives	Amino acids and derivatives	C17H24N4O3	-
ME0123891	T3_positive	Ethionamide	Heterocyclic compounds	Heterocyclic compounds	C8H10N2S	C07665
MEDP0540	T3_positive	Dihydrobiopterin	Heterocyclic compounds	Pteridines and derivatives	C9H13N5O3	C02953
ME0127564	T3_positive	S-Methylisothiourea hemisulfate	Alcohol and amines	Amines	C4H14N4O4S3	-
MEDL02331	T3_positive	3,4-Dimethoxycinnamic acid	Phenolic acids	Phenolic acids	C11H12O4	-
ME0157369	T3_positive	Tecomine	Heterocyclic compounds	Heterocyclic compounds	C11H17NO	C09988
ME0062070	T3_positive	Piperitone	Terpenoids	Terpene	C10H16O	-
MEDN0683	T3_positive	2-Naphthol	Phenolic acids	Phenolic acids	C10H8O	C11713
MEDL01843	T3_positive	Matairesinol	Lignans and Coumarins	Lignans	C20H22O6	C10682
MEDL02393	T3_positive	N-Methylnicotinamide	Alkaloids	Pyridine alkaloids	C7H8N2O	-
MEDL00375	T3_positive	Oglufanide	Amino acids and derivatives	Amino acids and derivatives	C16H19N3O5	-
MEDN0083	T3_positive	Syringic acid	Phenolic acids	Phenolic acids	C9H10O5	C10833
ME0137208	T3_positive	8-Hydroxy-7-methoxycoumarin	Lignans and Coumarins	Coumarins	C10H8O4	-
ME0117525	T3_positive	N-(3-Hydroxypropyl)phthalimide	Alkaloids	Plumerane	C11H11NO3	-
MEDL00352	T3_positive	Glu-Val	Amino acids and derivatives	Amino acids and derivatives	C10H18N2O5	-
MEDP0065	T3_positive	N-Acetyl-L-glutamic acid	Amino acids and derivatives	Amino acids and derivatives	C7H11NO5	C00624
MEDL02488	T3_positive	Quercetin	Flavonoids	Flavonols	C15H10O7	C00389
MEDL01831	T3_positive	n-cis-Feruloyltyramine	Alkaloids	Phenolamine	C18H19NO4	-
MEDP1807	T3_positive	Thymoquinone	Quinones	Quinones	C10H12O2	-
ME0131207	T3_positive	3,5-Dimethoxycinnamic acid	Organic acids	Organic acids	C11H12O4	-
ME0118781	T3_positive	4-Hydroxy-2-methylquinoline	Heterocyclic compounds	Heterocyclic compounds	C10H9NO	C21873
ME0111333	T3_positive	Triethanolamine	Alcohol and amines	Amines	C6H15NO3	C06771
MEDP0525	T3_positive	N-Acetyl-L-alanine	Amino acids and derivatives	Amino acids and derivatives	C5H9NO3	-
MEDP0898	T3_positive	Pyridoxal	Others	Vitamin	C8H9NO3	C00250
MEDP0603	T3_positive	4-Isopropylbenzaldehyde	Others	Aldehyde compounds	C10H12O	C06577
MEDN0555	T3_positive	Hydroxyphenyllactic acid	Benzene and substituted derivatives	Phenolic acids	C9H10O4	C03672
MEDL01926	T3_positive	Albanin A	Flavonoids	Flavones	C20H18O6	-
MEDN0422	T3_positive	2'-Deoxyadenosine	Nucleotides and derivatives	Nucleotides and derivatives	C10H13N5O3	C00559
MEDP0577	T3_positive	Carnitine isoC4:0	Alkaloids	Alkaloids	C11H21NO4	-
MEDN0037	T3_positive	Dopamine	Alkaloids	Phenolamine	C8H11NO2	C03758
MEDP1810	T3_positive	2,2,6,6-Tetramethyl-4-piperidinone	Heterocyclic compounds	Heterocyclic compounds	C9H17NO	-
ME0148605	T3_positive	12-Deoxy-phorbol-13-alpha-methylbutyrate-20-acetate	Others	Lactones	C27H38O7	C09086
MEDN0541	T3_positive	DL-3,4-Dihydroxyphenyl glycol	Benzene and substituted derivatives	Benzene and substituted derivatives	C8H10O4	C05576
ME0108971	T3_positive	O-benzyl-L-serine	Amino acids and derivatives	Amino acids and derivatives	C10H13NO3	-
ME0053503	T3_positive	Germacrone	Terpenoids	Sesquiterpenoids	C15H22O	C16966
ME0113931	T3_positive	Amygdalin	Alkaloids	Alkaloids	C20H27NO11	C08325
MEDP0537	T3_positive	LPC(O-16:0/2:0)	Lipids	LPC	C26H54NO7P	-
MEDP0137	T3_positive	3,4-Dihydroxybenzaldehyde	Phenolic acids	Phenolic acids	C7H6O3	C16700
MEDP0792	T3_positive	Pyrrolidine	Alkaloids	Pyrrole alkaloids	C4H9N	-
ME0107880	T3_positive	L-Homophenylalanine	Amino acids and derivatives	Amino acids and derivatives	C10H13NO2	C17235
MEDP1597	T3_positive	Securinine	Alkaloids	Terpenoid alkaloids	C13H15NO2	-
ME0146549	T3_positive	Bayogenin 3-O-cellobioside	Organic acids	Organic acids	C42H68O15	C08932
Lmzn006284	T3_positive	Corosolic acid	Terpenoids	Triterpene	C30H48O4	-
MEDP1776	T3_positive	L-Leucyl-L-alanine	Amino acids and derivatives	Amino acids and derivatives	C9H18N2O3	-
ME0111931	T3_positive	Gallacetophenone	Phenolic acids	Phenolic acids	C8H8O4	-
MEDP1162	T3_positive	1-Methylguanine	Nucleotides and derivatives	Nucleotides and derivatives	C6H7N5O	C04152
MEDP1503	T3_positive	N-Acetylhistamine	Alcohol and amines	Amines	C7H11N3O	C05135
MEDN0243	T3_positive	Pyridoxine	Others	Vitamin	C8H11NO3	C00314
MEDN1310	T3_positive	Sumiki's acid	Organic acids	Organic acids	C6H6O4	C20448
MEDN0442	T3_positive	Pantetheine	Alkaloids	Alkaloids	C11H22N2O4S	C00831
MEDN0563	T3_positive	2-Benzylsuccinic acid	Organic acids	Organic acids	C11H12O4	-
MEDN1575	T3_positive	Rhapontigenin	Others	Stilbene	C15H14O4	-
MEDL01846	T3_positive	Dihydroferulic acid	Organic acids	Organic acids	C10H12O4	-
MEDP1467	T3_positive	5-Methyl-2'-deoxycytidine	Nucleotides and derivatives	Nucleotides and derivatives	C10H15N3O4	C03592
MEDP0637	T3_positive	Phenylalanylproline	Amino acids and derivatives	Amino acids and derivatives	C14H18N2O3	-
MEDP1231	T3_positive	Folic acid	Others	Vitamin	C19H19N7O6	C00504
MEDL02759	T3_positive	2-Hydroxyglutarate	Organic acids	Organic acids	C5H8O5	C02630
MEDP1018	T3_positive	5'-Deoxyadenosine	Nucleotides and derivatives	Nucleotides and derivatives	C10H13N5O3	C05198
MEDP1869	T3_positive	Histidylleucine	Amino acids and derivatives	Amino acids and derivatives	C12H20N4O3	C05010
ME0009918	T3_positive	Thonzylamine	Phenolic acids	Phenolic acids	C16H22N4O	-
MEDP1675	T3_positive	Leu-Leu-Gly	Amino acids and derivatives	Amino acids and derivatives	C14H27N3O4	-
ME0103535	T3_positive	2',3'-Dideoxyinosine	Nucleotides and derivatives	Nucleotides and derivatives	C10H12N4O3	C06953
MEDN0579	T3_positive	N-lactoyl-phenylalanine	Amino acids and derivatives	Amino acids and derivatives	C12H15NO4	-
ME0124719	T3_positive	L-Tryptophanamide	Alcohol and amines	Amines	C11H13N3O	C00977
MEDP0618	T3_positive	Carnitine-2-methyl-C4	Fatty acyl	CAR	C12H23NO4	-
MEDN0210	T3_positive	1,5-Anhydrosorbitol	Others	Saccharides	C6H12O5	C07326
ME0146689	T3_positive	beta-Obscurine	Alkaloids	Isoquinoline alkaloids	C17H24N2O	C09890
MEDN1397	T3_positive	Succinylacetone	Organic acids	Organic acids	C7H10O4	-
MEDP0593	T3_positive	Thioguanine	Nucleotides and derivatives	Nucleotides and derivatives	C5H5N5S	C07648
ME0139977	T3_positive	Yangonin	Others	Stilbene	C15H14O4	C09980
ME0002692	T3_positive	2-Amino-5-nitrobenzophenone	Benzene and substituted derivatives	Benzene and substituted derivatives	C13H10N2O3	-
ME0003649	T3_positive	3,4-Dimethylbenzoic acid	Phenolic acids	Phenolic acids	C9H10O2	-
MEDL02179	T3_positive	Coumarin	Lignans and Coumarins	Coumarins	C9H6O2	C05851
MEDL01897	T3_positive	Isonicotinic acid	Others	Vitamin	C6H5NO2	C07446
MEDN1602	T3_positive	3'-Deoxyguanosine	Nucleotides and derivatives	Nucleotides and derivatives	C10H13N5O4	-
ME0146867	T3_positive	Brevicolline	Alkaloids	Alkaloids	C17H19N3	C09083
MEDP0894	T3_positive	3-Methoxytyramine	Phenolic acids	Phenolic acids	C9H13NO2	C05587
ME0154657	T3_positive	Nuatigenin	Steroids	Steroidal saponins	C27H42O4	C04715
ME0159432	T3_positive	Yamogenin	Steroids	Steroid	C27H42O3	C08918
MEDN0419	T3_positive	Uridine-5'-monophosphate	Nucleotides and derivatives	Nucleotides and derivatives	C9H13N2O9P	C00105
ME0146861	T3_positive	Brevetoxin A	Heterocyclic compounds	Heterocyclic compounds	C49H70O13	-
MEDP0791	T3_positive	4-Aminophenol	Benzene and substituted derivatives	Benzene and substituted derivatives	C6H7NO	C02372
MEDP1216	T3_positive	3-Methylhippuric acid	Organic acids	Organic acids	C10H11NO3	-
MEDN0854	T3_positive	Methylglutaric acid	Organic acids	Organic acids	C6H10O4	-
ME0127398	T3_positive	Allyl methyl sulfone	Others	Ketone compounds	C4H8O2S	-
MEDP1278	T3_positive	4-Methyl-5-thiazoleethanol	Others	Others	C6H9NOS	C04294
ME0169251	T3_positive	Harmine	Alkaloids	Alkaloids	C13H12N2O	C06538
ME0144864	T3_positive	Alchornine	Heterocyclic compounds	Heterocyclic compounds	C11H17N3O	C10567
MEDL00543	T3_positive	3-Methyladipic acid	Organic acids	Organic acids	C7H12O4	-
MEDP1083	T3_positive	Oxypurinol	Heterocyclic compounds	Heterocyclic compounds	C5H4N4O2	C07599
MEDP1962	T3_positive	IAA-L-Ala	Amino acids and derivatives	Amino acids and derivatives	C13H14N2O3	-
ME0015923	T3_positive	Artemisinin	Terpenoids	Sesquiterpenoids	C15H22O5	C09538
MEDP1307	T3_positive	(2S,3S)-2-amino-3-phenylbutanoic acid	Amino acids and derivatives	Amino acids and derivatives	C10H13NO2	C20895
ME0122260	T3_positive	6-Methyladenine	Nucleotides and derivatives	Nucleotides and derivatives	C6H7N5	C08434
MEDL02188	T3_positive	2-Aminobenzoic acid	Phenolic acids	Phenolic acids	C7H7NO2	C00108
ME0151815	T3_positive	Isodictamnine	Heterocyclic compounds	Heterocyclic compounds	C12H9NO2	C10697
MEDP0686	T3_positive	2-Acetylfuran	Heterocyclic compounds	Heterocyclic compounds	C6H6O2	-
MEDN1502	T3_positive	2-Phenylbutyric acid	Organic acids	Organic acids	C10H12O2	-
MEDP1077	T3_positive	2'-O-Methyladenosine	Nucleotides and derivatives	Nucleotides and derivatives	C11H15N5O4	-
MEDTP02578	T3_positive	2-Hydroxy-4-(methylthio)butyric acid	Organic acids	Organic acids	C5H10O3S	-
MEDP1617	T3_positive	L-Gulose	Others	Saccharides	C6H12O6	C15923
ME0127594	T3_positive	Epiafzelechin 3-O-gallate	Flavonoids	Flavanols	C22H18O9	-
ME0115424	T3_positive	Triethylene glycol monomethyl ether	Alcohol and amines	Alcohols	C7H16O4	-
MEDP0734	T3_positive	2-Aminophenol	Alkaloids	Phenolamine	C6H7NO	C01987
ME0109774	T3_positive	Suberylglycine	Amino acids and derivatives	Amino acids and derivatives	C10H17NO5	-
ME0000390	T3_positive	Oxymatrine	Alkaloids	Quinorisidine alkaloids	C15H24N2O2	-
MEDP0606	T3_positive	3,4-Dimethoxyphenethylamine	Benzene and substituted derivatives	Benzene and substituted derivatives	C10H15NO2	-
ME0140059	T3_positive	(-)-Sedamine	Alcohol and amines	Amines	C14H21NO	C10171
ME0010903	T3_positive	(1S,2S,4R,8S)-p-Menthane-1,2,8,9-tetrol 2-glucoside	Alcohol and amines	Alcohols	C16H30O9	-
ME0013649	T3_positive	Allyl cyclohexanebutyrate	Organic acids	Organic acids	C13H22O2	-
MEDL01954	T3_positive	2'-Hydroxygenistein	Flavonoids	Isoflavones	C15H10O6	C12134
MEDP1904	T3_positive	1-(9Z,12Z-octadecadienoyl)-glycero-3-phosphoethanolamine	Glycerophospholipids	LPE	C23H44NO7P	-
ME0006212	T3_positive	Benzenesulfonamide, 2-(cyclohexylamino)-5-nitro-N-((pentylamino)carbonyl)-	Benzene and substituted derivatives	Benzene and substituted derivatives	C18H28N4O5S	-
MEDL01849	T3_positive	Solanidine	Alkaloids	Steroid alkaloids	C27H43NO	C06543
ME0000297	T3_positive	Hydroquinidine	Alkaloids	Quinoline alkaloids	C20H26N2O2	-
ME0121732	T3_positive	2,6-Diamino-4-(2-pyridyl)-s-triazine	Heterocyclic compounds	Heterocyclic compounds	C8H8N6	-
MEDL00019	T3_positive	Theophylline	Alkaloids	Alkaloids	C7H8N4O2	C07130
ME0014136	T3_positive	3-Hydroxyvalproic acid	Organic acids	Organic acids	C8H16O3	C16651
MEDL01914	T3_positive	2,6-Dihydroxybenzoic acid	Benzene and substituted derivatives	Benzene and substituted derivatives	C7H6O4	-
MEDN0056	T3_positive	N-Acetylleucine	Amino acids and derivatives	Amino acids and derivatives	C8H15NO3	C02710
MEDL00496	T3_positive	Maleamic acid	Alcohol and amines	Amines	C4H5NO3	C01596
MEDP0213	T3_positive	N-Methyltryptamine	Alkaloids	Plumerane	C11H14N2	C06213
ME0111380	T3_positive	(1R,2R,4S)-p-Menthane-1,2,8-triol 8-glucoside	Alcohol and amines	Alcohols	C16H30O8	-
ME0108268	T3_positive	Methylacetoacetic acid	Others	Lactones	C5H8O3	-
ME0140036	T3_positive	Deltoin	Lignans and Coumarins	Coumarins	C19H20O5	C17482
MEDL00422	T3_positive	PC(18:3/18:3)	Glycerophospholipids	PC	C44H76NO8P	-
MEDP0790	T3_positive	4-Methoxybenzaldehyde	Phenolic acids	Phenolic acids	C8H8O2	C10761
MEDL01936	T3_positive	2',4'-Dihydroxy-6'-methoxyacetophenone	Others	Ketone compounds	C9H10O4	-
ME0115115	T3_positive	Phenethyl rutinoside	Benzene and substituted derivatives	Benzene and substituted derivatives	C20H30O10	-
ME0106937	T3_positive	Glu-Ala	Amino acids and derivatives	Amino acids and derivatives	C8H14N2O5	-
ME0157097	T3_positive	CAFFEINE and SODIUM BENZOATE	Benzene and substituted derivatives	Benzene and substituted derivatives	C15H15N4NaO4	-
ME0119684	T3_positive	3-Methyl-1,5-Dihydropyrazolo[4,3-C]pyrazole	Heterocyclic compounds	Heterocyclic compounds	C5H6N4	-
MEDL00911	T3_positive	6-Hydroxydopamine	Alcohol and amines	Polyamines	C8H11NO3	-
ME0139600	T3_positive	Rosellichalasin	Alkaloids	Alkaloids	C28H33NO5	-
ME0156449	T3_positive	Ruspolinone	Others	Ketone compounds	C14H19NO3	C10169
ME0001439	T3_positive	1-(4-Methylbenzenesulfonyl)-4-(3-nitropyridin-2-yl)piperazine	Benzene and substituted derivatives	Benzene and substituted derivatives	C16H18N4O4S	-
ME0149512	T3_positive	Geissospermine	Alkaloids	Alkaloids	C40H48N4O3	C09200
MEDP1348	T3_positive	1-(9Z-hexadecenoyl)-sn-glycero-3-phosphocholine	Lipids	LPC	C24H48NO7P	C04230
MEDP0881	T3_positive	Phosphocholine	Alkaloids	Alkaloids	C5H15NO4P+	C00588
MEDL02197	T3_positive	7-O-Methylluteolin	Flavonoids	Flavones	C16H12O6	-
ME0124447	T3_positive	Isatin	Alkaloids	Plumerane	C8H5NO2	C11129
ME0113971	T3_positive	2-(Hydroxymethyl)-6-[(3,4,5-trihydroxy-6-phenylmethoxyoxan-2-yl)methoxy]oxane-3,4,5-triol	Phenolic acids	Phenolic acids	C19H28O11	-
ME0000633	T3_positive	(2-Naphthylthio)acetic acid	Benzene and substituted derivatives	Benzene and substituted derivatives	C12H10O2S	-
MEDP1196	T3_positive	Biotin amide	Alcohol and amines	Amines	C10H17N3O2S	C01893
ME0121444	T3_positive	5-Ethynyl-1H-indole	Alkaloids	Plumerane	C10H7N	-
MEDP1585	T3_positive	Alanine glutamate	Amino acids and derivatives	Amino acids and derivatives	C8H14N2O5	-
ME0118300	T3_positive	2-Benzimidazolylguanidine	Benzene and substituted derivatives	Benzene and substituted derivatives	C8H9N5	-
ME0117226	T3_positive	1-Methylhypoxanthine	Nucleotides and derivatives	Nucleotides and derivatives	C6H6N4O	-
MEDN0149	T3_positive	7-Methylxanthine	Nucleotides and derivatives	Nucleotides and derivatives	C6H6N4O2	C16353
ME0157192	T3_positive	Squamocin	Fatty acyl	Others	C37H66O7	C08545
ME0104363	T3_positive	Acetamide, 2-(dimethylamino)-N-(5-ethyl-1,3,4-thiadiazol-2-yl)-	Alcohol and amines	Amines	C8H14N4OS	-
MEDP1228	T3_positive	Heterodendrin	Others	Others	C11H19NO6	C08332
ME0006920	T3_positive	DMABA NHS Ester	Benzene and substituted derivatives	Benzene and substituted derivatives	C13H14N2O4	-
ME0142889	T3_positive	3-Dehydroecdysone	Others	Ketone compounds	C27H42O6	-
MEDP2164	T3_positive	2,2-Dihydroxymethyl-1-azabicyclo[2.2.2]octan-3-one	Heterocyclic compounds	Heterocyclic compounds	C9H15NO3	-
MEDL02295	T3_positive	Hordenine	Alkaloids	Phenolamine	C10H15NO	C06199
ME0016220	T3_positive	Blumenol C O-[rhamnosyl-(1->6)-glucoside]	Others	Ketone compounds	C25H42O11	-
ME0056727	T3_positive	Paeoniflorin	Terpenoids	Monoterpenoids	C23H28O11	C09959
MEDP1669	T3_positive	Alanylphenylalanine	Amino acids and derivatives	Amino acids and derivatives	C12H16N2O3	-
ME0163415	T3_positive	N-formimidoyl-L-glutamate(1-)	Organic acids	Organic acids	C6H9N2O4-	-
ME0125438	T3_positive	Tenonitrozole	Alcohol and amines	Amines	C8H5N3O3S2	-
ME0111663	T3_positive	1-(Methylthio)-2-butanone	Others	Ketone compounds	C5H10OS	-
ME0117846	T3_positive	1,2,3,4-Tetrahydro-2,3-dioxoquinoxaline-6-carboxylic acid	Organic acids	Organic acids	C9H6N2O4	-
ME0014920	T3_positive	(2E,4E)-N-Isobutyl-6-(2-thienyl)hexa-2,4-dienamide	Lipids	Free fatty acids	C14H19NOS	-
ME0005428	T3_positive	5-[(4-Hydroxy-3-methoxyphenyl)methylidene]-1,3-dimethyl-1,3-diazinane-2,4,6-trione	Phenolic acids	Phenolic acids	C14H14N2O5	-
ME0156204	T3_positive	Pterostilbene Phosphate	Benzene and substituted derivatives	Benzene and substituted derivatives	C16H17O6P	-
MEDP0823	T3_positive	L-3-Phenyllactic acid	Organic acids	Organic acids	C9H10O3	C05607
MEDP0150	T3_positive	2'-Deoxyinosine	Nucleotides and derivatives	Nucleotides and derivatives	C10H12N4O4	C05512
ME0003013	T3_positive	2-Ethoxy-5-(4-methylpiperazin-1-yl)sulfonylbenzoic acid	Benzene and substituted derivatives	Benzene and substituted derivatives	C14H20N2O5S	-
ME0106553	T3_positive	Pantethine	Alcohol and amines	Polyamines	C22H42N4O8S2	-
ME0141981	T3_positive	2,3,6-Trihydroxypyridine	Alkaloids	Pyridine alkaloids	C5H5NO3	C03458
ME0000480	T3_positive	Vincamine	Alkaloids	Plumerane	C21H26N2O3	C09251
ME0113920	T3_positive	Alpha-Trisaccharide	Others	Saccharides	C20H37NO14	-
ME0117675	T3_positive	2-(benzylsulfanyl)-6-methoxy-1H-1,3-benzodiazole	Benzene and substituted derivatives	Benzene and substituted derivatives	C15H14N2OS	-
ME0115331	T3_positive	Swertiamarin	Terpenoids	Monoterpenoids	C16H22O10	C09800
MEDP1645	T3_positive	Benzamide	Phenolic acids	Phenolic acids	C7H7NO	C09815
ZINC5736909	T3_positive	Benzyl beta-d-glucopyranoside	Phenolic acids	Phenolic acids	C13H18O6	-
ME0009705	T3_positive	Salbutamol	Benzene and substituted derivatives	Benzene and substituted derivatives	C13H21NO3	C11770
MEDN0010	T3_positive	Citrulline	Amino acids and derivatives	Amino acids and derivatives	C6H13N3O3	C00327
ME0009714	T3_positive	Salmeterol	Benzene and substituted derivatives	Benzene and substituted derivatives	C25H37NO4	C07241
MEDP0752	T3_positive	DL-Leucine	Amino acids and derivatives	Amino acids and derivatives	C6H13NO2	-
ME0117321	T3_positive	1-(2-Quinoxalinyl)-1,2,3,4-butanetetrol	Heterocyclic compounds	Heterocyclic compounds	C12H14N2O4	-
MEDN0061	T3_positive	Phenylacetylglycine	Amino acids and derivatives	Amino acids and derivatives	C10H11NO3	C05598
MEDL02655	T3_positive	Albanol B	Flavonoids	Flavones	C34H22O8	-
ME0104841	T3_positive	1,2-Ethylenediphosphonic acid	Organic acids	Organic acids	C2H8O6P2	-
ME0107859	T3_positive	Levulinic acid	Organic acids	Organic acids	C5H8O3	-
MEDL02189	T3_positive	Gramine	Alkaloids	Plumerane	C11H14N2	C08304
MEDP1616	T3_positive	Pro-ala	Amino acids and derivatives	Amino acids and derivatives	C8H14N2O3	-
ME0116347	T3_positive	1-Prop-2-ynyl-1H-indole-3-carbaldehyde	Alkaloids	Plumerane	C12H9NO	-
MEDP1604	T3_positive	3-Indoleacetonitrile	Alkaloids	Plumerane	C10H8N2	C02938
ME0010899	T3_positive	(1S,2S,4R)-p-Menth-8-ene-1,2,10-triol 2-glucoside	Alcohol and amines	Alcohols	C16H28O8	-
MEDP0156	T3_positive	5-Methyluridine	Nucleotides and derivatives	Nucleotides and derivatives	C10H14N2O6	-
MEDP0677	T3_positive	1-Butylamine	Alkaloids	Alkaloids	C4H11N	-
MEDN1507	T3_positive	3-Methylpentanoic acid	Organic acids	Organic acids	C6H12O2	-
ME0001514	T3_positive	Red Violet 2RN Acid Anthraquinone	Benzene and substituted derivatives	Benzene and substituted derivatives	C21H13NO4	-
ME0009860	T3_positive	9,10-Anthracenedione, 1,8-dihydroxy-4-nitro-5-(phenylamino)-	Benzene and substituted derivatives	Benzene and substituted derivatives	C20H12N2O6	-
ME0142027	T3_positive	2,3-Diphenylquinoxaline-6-carboxylic acid	Organic acids	Organic acids	C21H14N2O2	-
ME0103833	T3_positive	Tricarballylic anhydride	Organic acids	Organic acids	C6H6O5	-
MEDL01741	T3_positive	Cyclopassifloside V	Terpenoids	Triterpene Saponin	C43H72O17	-
MEDN0018	T3_positive	L-Serine	Amino acids and derivatives	Amino acids and derivatives	C3H7NO3	C00065
MEDP1478	T3_positive	4-Pentenoic acid	Organic acids	Organic acids	C5H8O2	-
ME0123213	T3_positive	Carbadox	Alkaloids	Alkaloids	C11H10N4O4	-
MEDL01990	T3_positive	Acerosin	Flavonoids	Flavones	C18H16O8	C09982
ME0115524	T3_positive	Isopropyl-beta-D-thiogalactopyranoside	Others	Saccharides	C9H18O5S	-
ME0146491	T3_positive	Azafrin	Organic acids	Organic acids	C27H38O4	C08581
ME0168671	T3_positive	Abietic acid	Terpenoids	Ditepenoids	C20H30O2	C06087
ME0140025	T3_positive	Apparicine	Alkaloids	Plumerane	C18H20N2	C09036
MEDP1170	T3_positive	9-Octadecenal	Others	Aldehyde compounds	C18H34O	-
ME0049114	T3_positive	Cyclopassifloside III	Steroids	Steroid	C43H72O16	-
ME0014057	T3_positive	3-hydroxy-2-[4-(2-methylpropyl)phenyl]propanoic Acid	Organic acids	Organic acids	C13H18O3	-
MEDP0322	T3_positive	L-Homoserine	Amino acids and derivatives	Amino acids and derivatives	C4H9NO3	C00263
MEDL00853	T3_positive	Oxfenicine	Amino acids and derivatives	Amino acids and derivatives	C8H9NO3	-
MEDP1593	T3_positive	S-Lactoylglutathione	Organic acids	Organic acids	C13H21N3O8S	-
ME0154546	T3_positive	N-Methylmescaline	Benzene and substituted derivatives	Benzene and substituted derivatives	C12H19NO3	C08310
MEDP1836	T3_positive	Nootkatone	Terpenoids	Sesquiterpenoids	C15H22O	C17914
MEDP1605	T3_positive	Glu-glu	Amino acids and derivatives	Amino acids and derivatives	C10H16N2O7	C01425
MEDP0687	T3_positive	2-Acetyl-5-methylfuran	Others	Others	C7H8O2	-
pme0088	T3_positive	Luteolin	Flavonoids	Flavones	C15H10O6	C01514
mws3108_N	T3_positive	2,4-Dihydroxypyrimidine-5-carboxylic acid	Nucleotides and derivatives	Nucleotides and derivatives	C5H4N2O4	C03030
MEDP1087	T3_positive	MG(18:2/0:0/0:0)	Glycerolipids	MG	C21H38O4	-
ME0055134	T3_positive	Rhodiocyanoside A	Alkaloids	Alkaloids	C11H17NO6	-
ME0011264	T3_positive	(3R,7R)-1,3,7-Octanetriol	Fatty acyl	Others	C8H18O3	-
ME0000531	T3_positive	(10S,11S)-Pterosin C	Terpenoids	Sesquiterpenoids	C14H18O3	-
MEDP1670	T3_positive	Gly-Gly-Phe	Amino acids and derivatives	Amino acids and derivatives	C13H17N3O4	-
FDATN00279	T3_positive	Morin hydrate	Flavonoids	Flavonols	C15H12O8	-
MEDP1563	T3_positive	2-Amino-2-deoxy-D-gluconic acid	Others	Saccharides	C6H13NO6	C03752
ME0052353	T3_positive	Digoxigenin	Steroids	Cardiac glycoside	C23H34O5	-
ME0006587	T3_positive	Cinnarizine	Benzene and substituted derivatives	Benzene and substituted derivatives	C26H28N2	-
MEDL01803	T3_positive	Pelletierine	Alkaloids	Piperidine alkaloids	C8H15NO	C06182
ME0107190	T3_positive	Glycyl-L-phenylalanine 2-naphthylamide	Alcohol and amines	Amines	C21H21N3O2	-
ME0148472	T3_positive	Diginatin	Steroids	Steroid	C41H64O15	C08861
MEDP0298	T3_positive	Aminocaproic acid	Organic acids	Organic acids	C6H13NO2	C02378
MEDL02635	T3_positive	Phenylpropanolamine	Alkaloids	Alkaloids	C9H13NO	C02343
ME0000584	T3_positive	(2-Allyl-phenoxy)-acetic acid	Benzene and substituted derivatives	Benzene and substituted derivatives	C11H12O3	-
ME0117181	T3_positive	1-Methylbenzoimidazol-5-amine	Benzene and substituted derivatives	Benzene and substituted derivatives	C8H9N3	-
MEDP1084	T3_positive	Carnitine C12:0	Alkaloids	Alkaloids	C19H37NO4	-
MEDL02516	T3_positive	L-Homoarginine	Amino acids and derivatives	Amino acids and derivatives	C7H16N4O2	C01924
ME0117341	T3_positive	2-(1,4-Diazepan-1-yl)benzo[d]thiazole	Benzene and substituted derivatives	Benzene and substituted derivatives	C12H15N3S	-
ME0133012	T3_positive	3-Cyano-4-methylcoumarin	Lignans and Coumarins	Coumarins	C11H7NO2	-
MEDP1884	T3_positive	Prolyl-Histidine	Amino acids and derivatives	Amino acids and derivatives	C11H16N4O3	-
ME0054754	T3_positive	Melongoside O	Steroids	Steroidal saponins	C45H74O19	-
ME0114169	T3_positive	Dambonitol	Others	Saccharides	C8H16O6	-
ME0009375	T3_positive	Phenbenzamine	Benzene and substituted derivatives	Benzene and substituted derivatives	C17H22N2	-
MEDP0247	T3_positive	Nicotinuric acid	Amino acids and derivatives	Amino acids and derivatives	C8H8N2O3	C05380
ME0123504	T3_positive	Decitabine	Nucleotides and derivatives	Nucleotides and derivatives	C8H12N4O4	-
MEDP1684	T3_positive	H-Leu-leu-phe-OH	Amino acids and derivatives	Amino acids and derivatives	C21H33N3O4	-
MEDP1072	T3_positive	N7-Methylguanosine	Nucleotides and derivatives	Nucleotides and derivatives	C11H15N5O5	-
ME0133346	T3_positive	4-Dimethylaminocinnamaldehyde	Others	Aldehyde compounds	C11H13NO	-
ME0114245	T3_positive	Diaziquone	Others	Ketone compounds	C16H20N4O6	-
ME0137959	T3_positive	Dihydrodaidzein	Flavonoids	Isoflavones	C15H12O4	-
ME0150726	T3_positive	Heliotridine	Alkaloids	Alkaloids	C8H13NO2	C10321
ME0108071	T3_positive	Lysylproline	Amino acids and derivatives	Amino acids and derivatives	C11H21N3O3	-
Hmln002199	T3_positive	Quercetin-3-O-(6''-acetyl)galactoside	Flavonoids	Flavonols	C23H22O13	-
MEDP0384	T3_positive	Isoxanthopterin	Nucleotides and derivatives	Nucleotides and derivatives	C6H5N5O2	C03975
ME0146384	T3_positive	Astragaloside II	Terpenoids	Triterpene Saponin	C43H70O15	C17798
ME0001678	T3_positive	1-nitrosonaphthalene	Benzene and substituted derivatives	Benzene and substituted derivatives	C10H7NO	C14788
MEDP1076	T3_positive	Kojibiose	Others	Saccharides	C12H22O11	C19632
ME0006965	T3_positive	Elesclomol	Benzene and substituted derivatives	Benzene and substituted derivatives	C19H20N4O2S2	-
MEDL00926	T3_positive	Paraxanthine	Nucleotides and derivatives	Nucleotides and derivatives	C7H8N4O2	C13747
ME0140063	T3_positive	(-)-Sparticarpin	Heterocyclic compounds	Heterocyclic compounds	C17H16O5	-
MEDN0139	T3_positive	1-Methylxanthine	Nucleotides and derivatives	Nucleotides and derivatives	C6H6N4O2	C16358
MEDP1464	T3_positive	1,3-Diphenylguanidine	Alcohol and amines	Polyamines	C13H13N3	-
MEDL01899	T3_positive	Ricinine	Alkaloids	Pyridine alkaloids	C8H8N2O2	C01526
ME0122780	T3_positive	Almotriptan N-Oxide	Heterocyclic compounds	Heterocyclic compounds	C17H24N4O4S-2	-
ME0001939	T3_positive	2-(4-Isopropylphenoxy)propanohydrazide	Benzene and substituted derivatives	Benzene and substituted derivatives	C12H18N2O2	-
MEDP0437	T3_positive	Ergothioneine	Alkaloids	Alkaloids	C9H15N3O2S	C05570
ME0014165	T3_positive	3-Methyl-5-pentyl-2-furanpropanoic acid	Organic acids	Organic acids	C13H20O3	-
MEDN0156	T3_positive	Cytidine-5'-monophosphate	Nucleotides and derivatives	Nucleotides and derivatives	C9H14N3O8P	C00055
ME0147478	T3_positive	Cicutoxin	Alcohol and amines	Alcohols	C17H22O2	C08402
MEDP0067	T3_positive	2-Acetamido-2-Deoxy-D-Mannopyranose	Others	Saccharides	C8H15NO6	C00645
ME0000049	T3_positive	N-Nitrosoanabasine	Alkaloids	Alkaloids	C10H13N3O	-
ME0012920	T3_positive	1-Octadecyl Lysophosphatidic Acid	Glycerophospholipids	LPA	C21H45O6P	-
ME0139669	T3_positive	Schisandrin B	Lignans and Coumarins	Lignans	C23H28O6	-
MEDL02591	T3_positive	Arecoline	Alkaloids	Piperidine alkaloids	C8H13NO2	C10129
MEDL01840	T3_positive	Vanillylamine	Alkaloids	Phenolamine	C8H11NO2	C16666
ME0000279	T3_positive	Harringtonine	Alkaloids	Isoquinoline alkaloids	C28H37NO9	-
ME0113755	T3_positive	6-Methyl-5-hepten-2-one	Others	Ketone compounds	C8H14O	C07287
MEDL02381	T3_positive	4-Ethylbenzoic acid	Phenolic acids	Phenolic acids	C9H10O2	-
ME0106623	T3_positive	Ethyl (3-thioxo-1,2,4-triazaspiro[4.7]dodec-2-yl)acetate	Others	Lactones	C13H23N3O2S	-
MADP0557	T3_positive	Proline-Hydroxyproline	Amino acids and derivatives	Amino acids and derivatives	C10H16N2O4	-
ME0143420	T3_positive	4-Nitrophenyl-beta-D-galactopyranoside	Others	Saccharides	C12H15NO8	C04452
ME0127959	T3_positive	1-Cinnamoylpiperidine	Alkaloids	Piperidine alkaloids	C14H17NO	-
MEDP2091	T3_positive	4-(Bis(benzo[d][1,3]dioxol-5-yl)(hydroxy)methyl)piperidine-1-carboxylic-acid-4-nitrophenyl-ester	Benzene and substituted derivatives	Benzene and substituted derivatives	C27H24N2O9	-
ME0118203	T3_positive	2-Amino-3H-quinazolin-4-one	Others	Ketone compounds	C8H7N3O	-
ME0127109	T3_positive	O-Ethyl methylphosphonothioate	Organic acids	Organic acids	C3H9O2PS	-
MEDP2077	T3_positive	1-Phenylbiguanide	Benzene and substituted derivatives	Benzene and substituted derivatives	C8H11N5	-
MEDN1309	T3_positive	3-(Methylthio)propionic acid	Organic acids	Organic acids	C4H8O2S	C08276
ME0123155	T3_positive	Brazilin	Flavonoids	Other Flavonoids	C16H14O5	C09920
MEDP2122	T3_positive	11-Carbonyl-beta-acetyl-boswellic-acid	Organic acids	Organic acids	C32H48O5	-
ME0007582	T3_positive	Menadione	Others	Vitamin	C11H8O2	C05377
ME0015606	T3_positive	Ailanthone	Terpenoids	Ditepenoids	C20H24O7	C08747
ME0139445	T3_positive	Psoromic acid	Organic acids	Organic acids	C18H14O8	-
ME0126000	T3_positive	Oxibendazole	Benzene and substituted derivatives	Benzene and substituted derivatives	C12H15N3O3	C73898
ME0054697	T3_positive	Medicagenic acid	Terpenoids	Triterpene	C30H46O6	-
ME0147037	T3_positive	Cammaconine	Alkaloids	Terpenoid alkaloids	C23H37NO5	C08666
ME0053813	T3_positive	CID 10044294	Terpenoids	Monoterpenoids	C15H24O10	-
ME0139616	T3_positive	Rutamarin	Lignans and Coumarins	Coumarins	C21H24O5	C09308
MEDP0594	T3_positive	Dihydroactinidiolide	Others	Lactones	C11H16O2	-
MEDL01829	T3_positive	Isothankunic acid	Terpenoids	Triterpene	C30H48O6	-
ME0138805	T3_positive	Lobaric acid	Organic acids	Organic acids	C25H28O8	-
MEDN0342	T3_positive	Sebacic acid	Organic acids	Organic acids	C10H18O4	C08277
ME0002091	T3_positive	2,2-diphenyl-N-(3-phenylpropyl)acetamide	Benzene and substituted derivatives	Benzene and substituted derivatives	C23H23NO	-
MEDP1784	T3_positive	Methyl 2-furoate	Organic acids	Organic acids	C6H6O3	-
ME0015594	T3_positive	Agavasaponin C	Steroids	Steroidal saponins	C45H72O19	-
ME0006351	T3_positive	Bianthrone	Benzene and substituted derivatives	Benzene and substituted derivatives	C28H16O2	-
ME0115723	T3_positive	2H-Pyran-2-one, tetrahydro-6-(2-pentenyl)-	Others	Ketone compounds	C10H16O2	-
MEDL02423	T3_positive	Phosphocreatine	Organic acids	Organic acids	C4H10N3O5P	C02305
ME0053785	T3_positive	Goyaglycoside h	Terpenoids	Triterpene Saponin	C42H70O15	-
ME0114815	T3_positive	Melilotoside	Benzene and substituted derivatives	Benzene and substituted derivatives	C15H18O8	C05158
ME0158726	T3_positive	Tyr-Pro-Phe	Amino acids and derivatives	Amino acids and derivatives	C23H27N3O5	-
ME0144360	T3_positive	Phosphoadenosine phosphosulfate	Nucleotides and derivatives	Nucleotides and derivatives	C10H15N5O13P2S	C00053
ME0118514	T3_positive	2-Ethyl-4-hydroxy-5-methyl-3(2H)-furanone	Others	Ketone compounds	C7H10O3	-
ME0116961	T3_positive	1H-Benzimidazol-4-amine	Benzene and substituted derivatives	Benzene and substituted derivatives	C7H7N3	-
ME0000518	T3_positive	Igmesine	Benzene and substituted derivatives	Benzene and substituted derivatives	C23H29N	-
ME0107062	T3_positive	Glycylglycyl-L-histidine	Amino acids and derivatives	Amino acids and derivatives	C10H15N5O4	-
MEDL01845	T3_positive	Homodihydrocapsaicin	Alkaloids	Phenolamine	C19H31NO3	-
MEDN1155	T3_positive	Ketoleucine	Organic acids	Organic acids	C6H10O3	C00233
ME0124205	T3_positive	Gambogic acid	Organic acids	Organic acids	C38H44O8	-
ME0017135	T3_positive	cis-12-Octadecenoic acid methyl ester	Lipids	Free fatty acids	C19H36O2	-
MEDP1681	T3_positive	Leu-Gly-Leu	Amino acids and derivatives	Amino acids and derivatives	C14H27N3O4	-
MEDP0902	T3_positive	12-Hydroxydodecanoic acid	Lipids	Free fatty acids	C12H24O3	C08317
MEDL02489	T3_positive	Naringenin chalcone	Flavonoids	Chalcones	C15H12O5	C06561
ME0150341	T3_positive	Gly-Gln-Gly	Amino acids and derivatives	Amino acids and derivatives	C9H16N4O5	-
ME0106859	T3_positive	L-Glutaminyl-L-lysine	Amino acids and derivatives	Amino acids and derivatives	C11H22N4O4	-
ME0000543	T3_positive	(1R,6R)-6-benzylcyclohex-3-enecarboxylic acid	Benzene and substituted derivatives	Benzene and substituted derivatives	C14H16O2	-
ME0145034	T3_positive	Ammodendrine	Alkaloids	Piperidine alkaloids	C12H20N2O	-
ME0116368	T3_positive	1-(3-Amino-4,6-dimethylthieno[2,3-b]pyridin-2-yl)ethanone	Others	Ketone compounds	C11H12N2OS	-
ME0006843	T3_positive	Diisodecyl phthalate	Benzene and substituted derivatives	Benzene and substituted derivatives	C28H46O4	-
MEDN0150	T3_positive	8-Hydroxyguanosine	Nucleotides and derivatives	Nucleotides and derivatives	C10H13N5O6	-
ME0145134	T3_positive	Annofoline	Others	Ketone compounds	C16H25NO2	C09851
ME0137633	T3_positive	Chalepensin	Heterocyclic compounds	Heterocyclic compounds	C16H14O3	C09165
ME0117533	T3_positive	2-(3-Nitrophenyl)quinoline-4-carboxylic acid	Organic acids	Organic acids	C16H10N2O4	-
ME0011704	T3_positive	(Z,Z)-2,9,16-Heptadecatriene-4,6-diyn-8-ol	Alcohol and amines	Alcohols	C17H22O	-
ME0107914	T3_positive	2-(2-(1H-Indol-3-yl)acetamido)pentanedioic acid	Organic acids	Organic acids	C15H16N2O5	-
ME0141085	T3_positive	1,2-Anthracenediol	Benzene and substituted derivatives	Benzene and substituted derivatives	C14H10O2	-
MEDL02211	T3_positive	Sesamol	Lignans and Coumarins	Lignans	C7H6O3	C10832
ME0007080	T3_positive	Ethyl 4-hydroxy-3,5-dimethoxybenzoate	Benzene and substituted derivatives	Benzene and substituted derivatives	C11H14O5	-
ME0001375	T3_positive	1,4-Naphthoquinone	Quinones	Quinones	C10H6O2	C02617
ME0114715	T3_positive	Leiocarposide	Benzene and substituted derivatives	Benzene and substituted derivatives	C27H34O16	-
MEDL01977	T3_positive	psi-Pelletierine	Alkaloids	Piperidine alkaloids	C9H15NO	C10865
ME0013436	T3_positive	2-Decen-1-ol	Alcohol and amines	Alcohols	C10H20O	-
MEDN1306	T3_positive	Ureidosuccinic acid	Amino acids and derivatives	Amino acids and derivatives	C5H8N2O5	-
FDATN00564	T3_positive	Nordihydroguaiaretic acid	Benzene and substituted derivatives	Benzene and substituted derivatives	C18H22O4	-
ME0120093	T3_positive	2-Amino-4,6-dimethyl-1,3,5-triazine	Heterocyclic compounds	Heterocyclic compounds	C5H8N4	-
MEDP0709	T3_positive	Methyl dihydrojasmonate	Organic acids	Organic acids	C13H22O3	-
ME0013829	T3_positive	3,4-Dimethyl-5-pentyl-2-furanpropanoic acid	Organic acids	Organic acids	C14H22O3	-
ME0107036	T3_positive	Glu-Thr	Amino acids and derivatives	Amino acids and derivatives	C9H16N2O6	-
MEDL01742	T3_positive	Cyclopassifloside I	Terpenoids	Triterpene Saponin	C37H62O12	-
MEDP1339	T3_positive	LPC(18:1/0:0)	Lipids	LPC	C26H53NO7P	-
ME0003256	T3_positive	2-Methylbenzhydrol	Benzene and substituted derivatives	Benzene and substituted derivatives	C14H14O	-
ME0118855	T3_positive	2-Propylbenzimidazole	Benzene and substituted derivatives	Benzene and substituted derivatives	C10H12N2	-
ME0052355	T3_positive	Digoxin	Steroids	Steroid	C41H64O14	C06956
ME0120534	T3_positive	4-Hydroxy-6-methyl-2-pyrone	Others	Ketone compounds	C6H6O3	C02752
MEDP2185	T3_positive	N-Phenylhydroxylamine	Benzene and substituted derivatives	Benzene and substituted derivatives	C6H7NO	C02720
ME0000266	T3_positive	Galanthaminone	Alkaloids	Alkaloids	C17H19NO3	C08534
ME0063689	T3_positive	Strictosidine	Alkaloids	Alkaloids	C27H34N2O9	C03470
ME0114048	T3_positive	Catalposide	Terpenoids	Monoterpenoids	C22H26O12	-
ME0001273	T3_positive	1,2,4-Benzenetriol	Phenolic acids	Phenolic acids	C6H6O3	C02814
ME0138186	T3_positive	Forsythiaside	Phenolic acids	Phenolic acids	C29H36O15	-
ME0010577	T3_positive	2,3-Bis(1,3-benzodioxol-5-ylmethyl)butane-1,4-diol	Lignans and Coumarins	Lignans	C20H22O6	C10558
ME0133675	T3_positive	4-Hydroxy-8-methoxy-2H-furo[2,3-h]-1-benzopyran-2-one	Benzene and substituted derivatives	Benzene and substituted derivatives	C12H8O5	-
MEDP1577	T3_positive	Norvaline	Amino acids and derivatives	Amino acids and derivatives	C5H11NO2	C01826
ME0138842	T3_positive	Luvangetin	Lignans and Coumarins	Coumarins	C15H14O4	C09273
ME0147494	T3_positive	Cinmethylin	Benzene and substituted derivatives	Benzene and substituted derivatives	C18H26O2	-
ME0107344	T3_positive	DL-Histidyl-DL-histidine	Amino acids and derivatives	Amino acids and derivatives	C12H16N6O3	-
ME0001365	T3_positive	1,4-Dibenzylpiperazine	Benzene and substituted derivatives	Benzene and substituted derivatives	C18H22N2	-
ME0130099	T3_positive	Leukoefdin	Benzene and substituted derivatives	Benzene and substituted derivatives	C15H14O8	-
ME0052334	T3_positive	Diethyl adipate	Others	Lactones	C10H18O4	-
MEDL01821	T3_positive	3-Furoic acid	Organic acids	Organic acids	C5H4O3	-
MEDP0053	T3_positive	L-Dopa	Amino acids and derivatives	Amino acids and derivatives	C9H11NO4	C00355
ME0009177	T3_positive	N-Phenyl-2-naphthylamine	Benzene and substituted derivatives	Benzene and substituted derivatives	C16H13N	C14694
ME0136963	T3_positive	7-Ethoxy-4-methylcoumarin	Benzene and substituted derivatives	Benzene and substituted derivatives	C12H12O3	-
MEDTP02757	T3_positive	beta-Glycerophosphoric acid	Glycerophospholipids	GP	C3H9O6P	C02979
MEDL02462	T3_positive	Phosphoserine	Amino acids and derivatives	Amino acids and derivatives	C3H8NO6P	C01005
MEDP0075	T3_positive	Nα-Acetyl-L-Arginine	Amino acids and derivatives	Amino acids and derivatives	C8H16N4O3	-
ME0144266	T3_positive	Acetylatractylodinol	Others	Lactones	C15H12O3	C17857
ME0001800	T3_positive	2-(2-Naphthyl)indole	Benzene and substituted derivatives	Benzene and substituted derivatives	C18H13N	-
MEDP0526	T3_positive	6-Dimethylaminopurine	Nucleotides and derivatives	Nucleotides and derivatives	C7H9N5	-
ME0110277	T3_positive	Kyotorphin	Amino acids and derivatives	Amino acids and derivatives	C15H23N5O4	C02993
ME0054786	T3_positive	(2E,4E)-11-Methoxy-3,7,11-trimethyldodeca-2,4-dienoic acid	Terpenoids	Sesquiterpenoids	C16H28O3	-
ME0109227	T3_positive	Phenylalanylserine	Amino acids and derivatives	Amino acids and derivatives	C12H16N2O4	-
MEDP0650	T3_positive	4,4'-Methylenedianiline	Alkaloids	Alkaloids	C13H14N2	C14288
ME0159319	T3_positive	Ventinone A	Benzene and substituted derivatives	Benzene and substituted derivatives	C17H14O6	C10407
ME0138750	T3_positive	Lecanoric acid	Organic acids	Organic acids	C16H14O7	C02868
ME0137985	T3_positive	Dihydrosamidin	Lignans and Coumarins	Coumarins	C21H24O7	C09260
ME0006232	T3_positive	Benzidine	Benzene and substituted derivatives	Benzene and substituted derivatives	C12H12N2	C16444
ME0125007	T3_positive	Methoxybrassinin	Heterocyclic compounds	Heterocyclic compounds	C12H14N2OS2	C08506
ME0142166	T3_positive	21H,23H-Porphine,5,15-diphenyl-	Others	Others	C32H22N4	-
ME0109662	T3_positive	Ser-Gly	Amino acids and derivatives	Amino acids and derivatives	C5H10N2O4	-
ME0001356	T3_positive	N-[[4-[(pyridin-2-ylamino)methyl]phenyl]methyl]pyridin-2-amine	Benzene and substituted derivatives	Benzene and substituted derivatives	C18H18N4	-
ME0115288	T3_positive	Acetonitrile, ((2S,3R,4S,6R)-6-(beta-D-glucopyranosyloxy)-2-hydroxy-3,4-dimethoxycyclohexylidene)-, (2Z)-	Others	Saccharides	C16H25NO9	-
MEDL02246	T3_positive	Angelicin	Lignans and Coumarins	Coumarins	C11H6O3	C09060
MEDL02277	T3_positive	Methyl 2-aminobenzoate	Benzene and substituted derivatives	Benzene and substituted derivatives	C8H9NO2	-
ME0121498	T3_positive	2,3-Pyridinedicarboximide	Others	Ketone compounds	C7H4N2O2	-
ME0117697	T3_positive	ethyl 3-phenyl-1H-indole-2-carboxylate	Alkaloids	Plumerane	C17H15NO2	-
ME0016414	T3_positive	Carvyl acetate	Terpenoids	Monoterpenoids	C12H18O2	-
MEDL00564	T3_positive	Cynaroside	Flavonoids	Flavones	C21H20O11	C03951
ME0137498	T3_positive	Benzyl cinnamate	Benzene and substituted derivatives	Benzene and substituted derivatives	C16H14O2	-
MEDL02383	T3_positive	Ethyl gallate	Phenolic acids	Phenolic acids	C9H10O5	-
MEDP1102	T3_positive	Carnitine C10:0	Fatty acyl	CAR	C17H33NO4	-
ME0106183	T3_positive	Corynebactin	Amino acids and derivatives	Amino acids and derivatives	C39H42N6O18	-
MEDN0743	T3_positive	2-Nonanone	Others	Ketone compounds	C9H18O	-
ME0124673	T3_positive	(E)-Ligustilide	Others	Lactones	C12H14O2	-
ME0148473	T3_positive	Digitalin	Steroids	Steroid	C36H56O14	C08862
MEDN0074	T3_positive	gamma-Glutamylcysteine	Amino acids and derivatives	Amino acids and derivatives	C8H14N2O5S	C00669
MEDP0297	T3_positive	5-Aminopentanoic acid	Organic acids	Organic acids	C5H11NO2	C00431
ME0140561	T3_positive	Glucobrassicin-1-Sulfonate	Others	Glucosinolates	C16H20N2O12S3	-
ME0118531	T3_positive	2-Ethylthiophene	Heterocyclic compounds	Heterocyclic compounds	C6H8S	-
ME0118839	T3_positive	6,7-Dimethoxy-2-(piperazin-1-yl)quinazolin-4-amine	Heterocyclic compounds	Heterocyclic compounds	C14H19N5O2	-
MEDP1367	T3_positive	Ala-Tyr	Amino acids and derivatives	Amino acids and derivatives	C12H16N2O4	-
MEDP0215	T3_positive	Quinine	Alkaloids	Quinoline alkaloids	C20H24N2O2	C06526
ME0128402	T3_positive	(S,S)-(-)-Hydrobenzoin	Benzene and substituted derivatives	Benzene and substituted derivatives	C14H14O2	-
ME0000171	T3_positive	Catharanthine	Alkaloids	Plumerane	C21H24N2O2	-
ME0127743	T3_positive	4-[(3,3-Dimethyloxiran-2-yl)methoxy]furo[3,2-g]chromen-7-one	Lignans and Coumarins	Coumarins	C16H14O5	C09282
ME0139797	T3_positive	Tephrosin	Flavonoids	Other Flavonoids	C23H22O7	-
MEDL01930	T3_positive	Bis-ferulamidobutane	Alkaloids	Phenolamine	C24H28N2O6	-
ME0114086	T3_positive	cis-3-Hexenal	Others	Aldehyde compounds	C6H10O	C16310
ME0000044	T3_positive	(S)-2-Propylpiperidine	Alkaloids	Alkaloids	C8H17N	C06523
ME0126037	T3_positive	Papaverine	Alkaloids	Isoquinoline alkaloids	C20H21NO4	C06533
ME0054875	T3_positive	Methyl caprylate	Fatty acyl	Others	C9H18O2	-
ME0117278	T3_positive	1-Piperidinecarboxaldehyde	Heterocyclic compounds	Heterocyclic compounds	C6H11NO	-
ME0104489	T3_positive	2-amino-3-(1H-pyrazol-1-yl)propanoic acid	Organic acids	Organic acids	C6H9N3O2	-
ME0116594	T3_positive	2-Mercapto-3-phenyl-3H-quinazolin-4-one	Others	Ketone compounds	C14H10N2OS	-
ME0104891	T3_positive	3-(Methylsulfonyl)propyl methanesulfonate	Organic acids	Organic acids	C5H12O5S2	-
MADP0523	T3_positive	N(6),N(6)-Dimethyl-L-lysine	Amino acids and derivatives	Amino acids and derivatives	C8H18N2O2	-
ME0006355	T3_positive	Bifenazate	Benzene and substituted derivatives	Benzene and substituted derivatives	C17H20N2O3	C18589
ME0137942	T3_positive	Bis-coumaramidobutane	Heterocyclic compounds	Heterocyclic compounds	C22H24N2O4	-
MEDP0296	T3_positive	4-Guanidinobutyric acid	Organic acids	Organic acids	C5H11N3O2	C01035
ME0127740	T3_positive	2-Phenylpropionate	Organic acids	Organic acids	C9H10O2	-
ME0016351	T3_positive	Cannabidiol dimethyl ether	Benzene and substituted derivatives	Benzene and substituted derivatives	C23H34O2	-
MEDP1808	T3_positive	Trans-Zeatin	Alkaloids	Alkaloids	C10H13N5O	C00371
ME0004326	T3_positive	4-(4-Isobutylphenyl)-1,3-thiazol-2-amine	Benzene and substituted derivatives	Benzene and substituted derivatives	C13H16N2S	-
MEDP0180	T3_positive	Nicotinamide mononucleotide	Nucleotides and derivatives	Nucleotides and derivatives	C11H15N2O8P	C00455
ME0000243	T3_positive	Ecgonine methyl ester	Alkaloids	Tropan alkaloids	C10H17NO3	C12448
ME0157939	T3_positive	Tinyatoxin	Terpenoids	Ditepenoids	C36H38O8	-
MEDN0050	T3_positive	L-Theanine	Amino acids and derivatives	Amino acids and derivatives	C7H14N2O3	C01047
MEDTN03140	T3_positive	2-Phospho-D-Glyceric Acid	Organic acids	Organic acids	C3H7O7P	C00631
MEDP0129	T3_positive	Phenethylamine	Alkaloids	Alkaloids	C8H11N	C05332
MEDN0226	T3_positive	Erythrono-1,4-lactone	Others	Lactones	C4H6O4	-
ME0114894	T3_positive	Mycotoxin T 2	Others	Others	C16H23NO7	-
MEDN0806	T3_positive	Aceglutamide	Amino acids and derivatives	Amino acids and derivatives	C7H12N2O4	-
MEDP1679	T3_positive	Glu-Val-Phe	Amino acids and derivatives	Amino acids and derivatives	C19H27N3O6	-
ME0155643	T3_positive	Podorhizol beta-D-glucoside	Lignans and Coumarins	Lignans	C28H34O13	-
ME0063531	T3_positive	S-Isopropyl 3-methylbut-2-enethioate	Fatty acyl	Others	C8H14OS	-
MEDL02282	T3_positive	N,N-dimethylarginine	Amino acids and derivatives	Amino acids and derivatives	C8H18N4O2	C03626
ME0004791	T3_positive	4-Guanidinobenzoic acid	Benzene and substituted derivatives	Benzene and substituted derivatives	C8H9N3O2	-
ME0154462	T3_positive	N-Glucosylnicotinate	Benzene and substituted derivatives	Benzene and substituted derivatives	C12H16NO7+	C03003
ME0112116	T3_positive	2-Deoxy-D-ribose	Others	Saccharides	C5H10O4	-
MADP0570	T3_positive	7-Deazaadenosine	Nucleotides and derivatives	Nucleotides and derivatives	C11H14N4O4	-
ME0108074	T3_positive	Lys-Ser	Amino acids and derivatives	Amino acids and derivatives	C9H19N3O4	-
MEDP1600	T3_positive	4-Propylphenol	Benzene and substituted derivatives	Benzene and substituted derivatives	C9H12O	C14311
MEDP1354	T3_positive	Mycosporine-serinol	Amino acids and derivatives	Amino acids and derivatives	C11H19NO6	C10607
ME0127485	T3_positive	Ethyl(methylthio)methyl disulfide	Others	Lactones	C4H10S3	-
MEDP1683	T3_positive	Trileucine	Amino acids and derivatives	Amino acids and derivatives	C18H35N3O4	-
ME0122727	T3_positive	Acetazolamide	Alcohol and amines	Amines	C4H6N4O3S2	C06805
ME0000452	T3_positive	Strychnine	Alkaloids	Alkaloids	C21H22N2O2	C06522
ME0157167	T3_positive	Spinosyn B	Others	Lactones	C40H63NO10	-
ME0063351	T3_positive	Methyl ricinoleate	Fatty acyl	Others	C19H36O3	-
ME0154497	T3_positive	Nifuradene	Others	Ketone compounds	C8H8N4O4	C19272
ME0013945	T3_positive	3b,6a-Dihydroxy-alpha-ionol 9-[apiosyl-(1->6)-glucoside]	Organic acids	Organic acids	C24H40O12	-
ME0107035	T3_positive	Glutethimide	Alcohol and amines	Amines	C13H15NO2	C07489
ME0009295	T3_positive	Oxamflatin	Benzene and substituted derivatives	Benzene and substituted derivatives	C17H14N2O4S	-
ME0153957	T3_positive	Montanol	Terpenoids	Monoterpenoids	C21H36O4	C09137
ME0158046	T3_positive	Trichotomine	Benzene and substituted derivatives	Benzene and substituted derivatives	C30H20N4O6	C09247
ME0148113	T3_positive	Cys-Tyr	Amino acids and derivatives	Amino acids and derivatives	C12H16N2O4S	-
ME0115081	T3_positive	Paeonolide	Others	Others	C20H28O12	C10715
MEDN0057	T3_positive	N-Acetyl-L-tyrosine	Amino acids and derivatives	Amino acids and derivatives	C11H13NO4	C01657
ME0138536	T3_positive	Isorhoifolin	Heterocyclic compounds	Heterocyclic compounds	C27H30O14	-
ME0146336	T3_positive	Asp-Asp	Amino acids and derivatives	Amino acids and derivatives	C8H12N2O7	-
MEDL02624	T3_positive	Piperlonguminine	Alkaloids	Alkaloids	C16H19NO3	-
ME0009257	T3_positive	Olmesartan	Benzene and substituted derivatives	Benzene and substituted derivatives	C24H26N6O3	-
ME0147869	T3_positive	Cucurbitacin P	Others	Ketone compounds	C30H48O7	C08804
MEDN0052	T3_positive	N6-Acetyl-L-lysine	Amino acids and derivatives	Amino acids and derivatives	C8H16N2O3	C02727
MEDTP00538	T3_positive	3-Oxo-octanoic acid (2-oxo-tetrahydro-furan-3-YL)-amide	Amino acids and derivatives	Amino acids and derivatives	C12H19NO4	-
ME0014038	T3_positive	3-Hexaprenyl-4,5-dihydroxybenzoic acid	Benzene and substituted derivatives	Benzene and substituted derivatives	C37H54O4	C05200
ME0128017	T3_positive	Catechin tetramethylether	Benzene and substituted derivatives	Benzene and substituted derivatives	C19H22O6	-
ME0114621	T3_positive	Indican	Alkaloids	Plumerane	C14H17NO6	-
MEDN0561	T3_positive	Spaglumic acid	Amino acids and derivatives	Amino acids and derivatives	C11H16N2O8	C12270
MEDP1832	T3_positive	Ethyl maltol	Phenolic acids	Phenolic acids	C7H8O3	C20362
ME0103896	T3_positive	(3-Nitroamino)alanine	Organic acids	Organic acids	C3H7N3O4	-
ME0109398	T3_positive	Pro-Lys	Amino acids and derivatives	Amino acids and derivatives	C11H21N3O3	-
MEDP1613	T3_positive	Val-val	Amino acids and derivatives	Amino acids and derivatives	C10H20N2O3	-
ME0116861	T3_positive	1-Acetylpiperidine	Heterocyclic compounds	Heterocyclic compounds	C7H13NO	-
ME0054852	T3_positive	Acetylacrylic Acid Methyl Ester	Fatty acyl	Others	C6H8O3	-
ME0010784	T3_positive	(+)-Isomenthone	Others	Ketone compounds	C10H18O	-
ME0133699	T3_positive	4'-Methoxychalcone	Flavonoids	Chalcones	C16H14O2	-
ME0139705	T3_positive	Shoyuflavone B	Flavonoids	Flavones	C19H14O10	-
ME0137107	T3_positive	7-Methoxyflavanone	Others	Ketone compounds	C16H14O3	-
ME0016076	T3_positive	Bergaptol geranyl ether	Heterocyclic compounds	Heterocyclic compounds	C21H22O4	-
ME0108611	T3_positive	N-Acetylcysteine amide	Alcohol and amines	Amines	C5H10N2O2S	-
ME0142123	T3_positive	2',7-Dihydroxy-4',5'-methylenedioxyisoflavone	Flavonoids	Flavones	C16H10O6	-
MEDP0151	T3_positive	Isoguanine	Nucleotides and derivatives	Nucleotides and derivatives	C5H5N5O	-
ME0008738	T3_positive	1-(5-Ethylsulfanyl-1,3,4-thiadiazol-2-yl)-3-phenylurea	Benzene and substituted derivatives	Benzene and substituted derivatives	C11H12N4OS2	-
ME0002667	T3_positive	2-Amino-4-methylphenol	Phenolic acids	Phenolic acids	C7H9NO	-
ME0125375	T3_positive	N-(3-phenylpropyl)quinazolin-4-amine	Alcohol and amines	Amines	C17H17N3	-
MEDN1008	T3_positive	FFA(11:1)	Lipids	Free fatty acids	C11H20O2	C13910
MEDN0722	T3_positive	Orcinol	Phenolic acids	Phenolic acids	C7H8O2	C00727
ME0151663	T3_positive	Ile-Ala	Amino acids and derivatives	Amino acids and derivatives	C9H18N2O3	-
ME0122710	T3_positive	9-Methyluric acid	Organic acids	Organic acids	C6H6N4O3	-
MEDP2124	T3_positive	Ethyl (R)-(-)-mandelate	Benzene and substituted derivatives	Benzene and substituted derivatives	C10H12O3	-
MEDP1991	T3_positive	Riboprine	Nucleotides and derivatives	Nucleotides and derivatives	C15H21N5O4	-
ME0055475	T3_positive	(2-Hydroxy-2-oxo-1,2lambda5-oxaphospholan-5-yl)methyl (Z)-octadec-9-enoate	Lipids	Free fatty acids	C22H41O5P	-
ME0005990	T3_positive	Aloin	Quinones	Anthraquinone	C21H22O9	C17778
MEDL02426	T3_positive	Methyl benzoate	Phenolic acids	Phenolic acids	C8H8O2	-
MEDP1554	T3_positive	Ethyl salicylate	Phenolic acids	Phenolic acids	C9H10O3	-
ME0017134	T3_positive	cis-11-Methyl-2-dodecenoic acid	Lipids	Free fatty acids	C13H24O2	C18206
ME0126293	T3_positive	Pyrazinamide	Organic acids	Organic acids	C5H5N3O	C01956
MEDP0672	T3_positive	Cyclohexylamine	Alkaloids	Alkaloids	C6H13N	C00571
MEDL01875	T3_positive	[10]-Shogaol	Phenolic acids	Phenolic acids	C21H32O3	-
ME0063385	T3_positive	Rubusoside	Terpenoids	Terpene	C32H50O13	-
MEDP0367	T3_positive	γ-Aminobutyric Acid	Organic acids	Organic acids	C4H9NO2	C00334
ME0000043	T3_positive	10-Hydroxycamptothecin	Alkaloids	Quinoline alkaloids	C20H16N2O5	C17939
ME0137235	T3_positive	8-O-methylretusin	Flavonoids	Isoflavones	C17H14O5	-
MEDP0874	T3_positive	Lenticin	Organic acids	Organic acids	C14H18N2O2	C09213
ME0139527	T3_positive	Quercetin 3-sophorotrioside	Flavonoids	Flavonols	C33H40O22	C12668
ME0147281	T3_positive	Ceanothine B	Amino acids and derivatives	Amino acids and derivatives	C29H36N4O4	C10001
ME0154092	T3_positive	n-(alpha-Linolenoyl) tyrosine	Amino acids and derivatives	Amino acids and derivatives	C27H39NO4	-
ME0009415	T3_positive	Phenylacetic acid	Organic acids	Organic acids	C8H8O2	C07086
ME0006211	T3_positive	Benzenesulfonimidic acid	Benzene and substituted derivatives	Benzene and substituted derivatives	C6H7NO2S	-
MEDL00066	T3_positive	2-Hydroxy-2-methylbutyric acid	Organic acids	Organic acids	C5H10O3	-
ME0103666	T3_positive	Telbivudine	Nucleotides and derivatives	Nucleotides and derivatives	C10H14N2O5	-
MEDP1249	T3_positive	2-Oxo-4-phenylbutyric acid	Benzene and substituted derivatives	Phenolic acids	C10H10O3	C20327
ME0130320	T3_positive	2-(Methylthiomethyl)-3-phenylpropenal	Heterocyclic compounds	Heterocyclic compounds	C11H12OS	-
ME0129513	T3_positive	1-(2,6-Dihydroxy-4-methoxyphenyl)-3-phenyl-1-propanone	Others	Ketone compounds	C16H16O4	C09644
ME0108511	T3_positive	N-[(3s)-2-Oxotetrahydrofuran-3-Yl]butanamide	Others	Lactones	C8H13NO3	-
ME0012411	T3_positive	15(S)-Hpepe	Lipids	Free fatty acids	C20H30O4	-
ME0144418	T3_positive	[(1S,12S,14R,15E)-15-ethylidene-3-methyl-3,17-diazapentacyclo[12.3.1.02,10.04,9.012,17]octadeca-2(10),4,6,8-tetraen-13-yl]methanol	Alkaloids	Alkaloids	C20H24N2O	C09022
MEDP0560	T3_positive	Dihydrouracil	Nucleotides and derivatives	Nucleotides and derivatives	C4H6N2O2	C00429
ME0116084	T3_positive	(5S)-5-heptyloxolan-2-one	Others	Lactones	C11H20O2	C08571
ME0124677	T3_positive	Linalyl oxide	Heterocyclic compounds	Heterocyclic compounds	C10H18O2	-
ME0015797	T3_positive	Anisatin	Heterocyclic compounds	Heterocyclic compounds	C15H20O8	-
ME0015831	T3_positive	Antheraxanthin	Heterocyclic compounds	Heterocyclic compounds	C40H56O3	C08579
ME0007527	T3_positive	Lucidin	Quinones	Anthraquinone	C15H10O5	-
ME0147255	T3_positive	Cathenamine	Alkaloids	Alkaloids	C21H22N2O3	-
ME0134072	T3_positive	Isorhamnetin 3-galactoside	Flavonoids	Flavonols	C22H22O12	-
ME0119667	T3_positive	3-Ketocarbofuran	Heterocyclic compounds	Heterocyclic compounds	C12H13NO4	-
MEDL01832	T3_positive	(-)-Arctigenin	Lignans and Coumarins	Lignans	C21H24O6	C10545
ME0006902	T3_positive	Methyldiphenylphosphine oxide	Benzene and substituted derivatives	Benzene and substituted derivatives	C13H13OP	-
ME0139360	T3_positive	Pimpinellin	Lignans and Coumarins	Coumarins	C13H10O5	C09285
ME0127089	T3_positive	n-Pentanoic acid, trimethylsilyl ester	Organic acids	Organic acids	C18H38O2Si	-
ME0158681	T3_positive	Tyr-Ala	Amino acids and derivatives	Amino acids and derivatives	C12H16N2O4	-
MEDN1354	T3_positive	3-Methacrylic acid	Organic acids	Organic acids	C5H8O2	C00010280
ME0114676	T3_positive	Ketorolac	Heterocyclic compounds	Heterocyclic compounds	C15H13NO3	C07062
MEDL02502	T3_positive	3-Hydroxyflavone	Flavonoids	Flavonols	C15H10O3	C01495
ME0152801	T3_positive	Lucidine B	Heterocyclic compounds	Heterocyclic compounds	C30H49N3O	-
ME0109740	T3_positive	S-Nitroso-N-acetyl-DL-penicillamine	Alcohol and amines	Amines	C7H12N2O4S	-
ME0142083	T3_positive	Muconolactone	Others	Lactones	C6H6O4	C04105
ME0168990	T3_positive	CYCLOPIAZONIC ACID	Organic acids	Organic acids	C20H20N2O3	-
ME0143363	T3_positive	3,4-Dihydroxybenzyl alcohol	Phenolic acids	Phenolic acids	C7H8O3	-
MEDP1486	T3_positive	3-Hexenedioic acid	Organic acids	Organic acids	C6H8O4	-
ME0127415	T3_positive	Butyl 1-(methylthio)propyl disulfide	Others	Others	C8H18S3	-
ME0109645	T3_positive	Ser-Ala	Amino acids and derivatives	Amino acids and derivatives	C6H12N2O4	-
ME0143899	T3_positive	6-tuliposide B	Others	Lactones	C11H18O9	C21186
ME0139810	T3_positive	Texasin	Flavonoids	Isoflavones	C16H12O5	-
MEDN0420	T3_positive	Acetylglycine	Amino acids and derivatives	Amino acids and derivatives	C4H7NO3	-
ME0137619	T3_positive	Catechin pentaacetate	Others	Lactones	C25H24O11	-
MEDN0294	T3_positive	3-Methylcrotonylglycine	Amino acids and derivatives	Amino acids and derivatives	C7H11NO3	-
MEDN1375	T3_positive	3-Phenylbutyric acid	Organic acids	Organic acids	C10H12O2	-
ME0151257	T3_positive	Hydroxy-gamma-Sanshool	Alkaloids	Alkaloids	C18H27NO2	C17827
ME0008649	T3_positive	((2-Morpholin-4-ylethyl)amino)(phenylamino)methane-1-thione	Benzene and substituted derivatives	Benzene and substituted derivatives	C13H19N3OS	-
ME0007331	T3_positive	Honokiol	Lignans and Coumarins	Lignans	C18H18O2	C10630
ME0055284	T3_positive	all-trans-Neoxanthin	Terpenoids	Tetraterpenes	C40H56O4	C08606
ME0009321	T3_positive	4-Acetamidobenzaldehyde	Benzene and substituted derivatives	Benzene and substituted derivatives	C9H9NO2	-
ME0011064	T3_positive	(2R)-1-O-beta-D-Galactopyranosylglycerol	Glycerolipids	DG	C9H18O8	-
ME0106080	T3_positive	n-Butyl acetate	Others	Lactones	C6H12O2	C12304
MEDP1141	T3_positive	2,6-Di-tert-butyl-P-benzoquinone	Quinones	Quinones	C14H20O2	-
MEDP0203	T3_positive	Cinnamaldehyde	Phenolic acids	Phenolic acids	C9H8O	C00903
ME0010239	T3_positive	Colchicine	Alkaloids	Alkaloids	C22H25NO6	C07592
MEDN0040	T3_positive	Glyc-Pro	Amino acids and derivatives	Amino acids and derivatives	C7H12N2O3	-
ME0152592	T3_positive	Leucomycin a7	Others	Lactones	C38H63NO14	-
MEDP1757	T3_positive	Ethyl vanillin	Benzene and substituted derivatives	Benzene and substituted derivatives	C9H10O3	-
ME0136735	T3_positive	6-Methoxyflavanone	Others	Ketone compounds	C16H14O3	-
ME0160419	T3_positive	(Z)-Ethene-1,2-diol	Alcohol and amines	Alcohols	C2H4O2	-
ME0113884	T3_positive	Aloeresin A	Flavonoids	Other Flavonoids	C28H28O11	C17781
MEDP1337	T3_positive	LysoPC 18:0	Lipids	LPC	C26H54NO7P	C04230
MEDN0025	T3_positive	3-Hydroxymethylglutaric acid	Amino acids and derivatives	Amino acids and derivatives	C6H10O5	C03761
ME0117890	T3_positive	2,4-Diamino-6-hydroxypyrimidine	Heterocyclic compounds	Heterocyclic compounds	C4H6N4O	-
ME0052422	T3_positive	Dioscin	Steroids	Steroidal saponins	C45H72O16	C08897
ME0134097	T3_positive	Farrerol	Flavonoids	Flavanones	C17H16O5	-
ME0141775	T3_positive	1-methyl-3-[(E)-(4-oxo-3-prop-2-enyl-1,3-thiazolidin-2-ylidene)amino]thiourea	Heterocyclic compounds	Heterocyclic compounds	C8H12N4OS2	-
MEDL01931	T3_positive	Alternariol	Others	Others	C14H10O5	C16838
MEDTP01677	T3_positive	cis-5-Dodecenoic acid	Lipids	Free fatty acids	C12H22O2	-
ME0105011	T3_positive	3-Ethyl-2-thioxoimidazolidin-4-one	Others	Ketone compounds	C5H8N2OS	-
ME0000095	T3_positive	6-Acetylmorphine	Alkaloids	Isoquinoline alkaloids	C19H21NO4	-
ME0114930	T3_positive	(Z)-N-[(4-hydroxyphenyl)methyl]ethoxycarbothioamide 4'-(tri-acetylrhamnoside)	Alcohol and amines	Amines	C22H29NO9S	-
MEDP2105	T3_positive	3,6,9,12,15,18,21-Heptaoxatricosane-21,23-diol	Benzene and substituted derivatives	Benzene and substituted derivatives	C16H34O9	-
ME0114499	T3_positive	D-Galactosamine 1-phosphate	Others	Saccharides	C6H14NO8P	C03783
ME0114190	T3_positive	Deoxyribose 5-phosphate	Nucleotides and derivatives	Nucleotides and derivatives	C5H11O7P	C00673
ME0014329	T3_positive	4-(Methylsulfanyl)-2-oxobutanoic acid	Organic acids	Organic acids	C5H8O3S	C01180
ME0000811	T3_positive	2-Methoxy-1-(2-methoxynaphthalen-1-yl)naphthalene	Benzene and substituted derivatives	Benzene and substituted derivatives	C22H18O2	-
ME0147093	T3_positive	Carbobenzyloxy-L-phenylalanyl-L-norleucine methyl ester	Amino acids and derivatives	Amino acids and derivatives	C24H30N2O5	-
ME0133004	T3_positive	3-Carbethoxypsoralen	Heterocyclic compounds	Heterocyclic compounds	C14H10O5	C19357
ME0007219	T3_positive	Frangulin A	Benzene and substituted derivatives	Benzene and substituted derivatives	C21H20O9	-
MEDP1611	T3_positive	Glutamylglutamine	Amino acids and derivatives	Amino acids and derivatives	C10H17N3O6	-
ME0155056	T3_positive	p-Glucosyloxymandelonitrile	Benzene and substituted derivatives	Benzene and substituted derivatives	C14H17NO7	C08330
ME0160012	T3_positive	Fosinoprilat	Organic acids	Organic acids	C23H34NO5P	C21542
MADN0548	T3_positive	Fmoc-L-leucine	Amino acids and derivatives	Amino acids and derivatives	C21H23NO4	-
ME0151985	T3_positive	Kaempferol 3-O-beta-D-glucosylgalactoside	Flavonoids	Flavonols	C27H30O16	-
MEDL02748	T3_positive	Auraptene	Lignans and Coumarins	Coumarins	C19H22O3	-
MEDN1793	T3_positive	protoveratrine A	Alkaloids	Steroid alkaloids	C41H63NO14	-
ME0114303	T3_positive	D-Lyxose	Others	Saccharides	C5H10O5	C00476
ME0009998	T3_positive	Tropacocaine	Benzene and substituted derivatives	Benzene and substituted derivatives	C15H19NO2	-
ME0105376	T3_positive	7-Aminodesacetoxycephalosporanic acid	Organic acids	Organic acids	C8H10N2O3S	-
ME0002725	T3_positive	2-Aminonaphthalene	Benzene and substituted derivatives	Benzene and substituted derivatives	C10H9N	C02227
ME0147339	T3_positive	Cercosporin	Others	Others	C29H26O10	-
MEDP0820	T3_positive	Gamma-Caprolactone	Others	Lactones	C6H10O2	-
ME0145603	T3_positive	Arg-Lys	Amino acids and derivatives	Amino acids and derivatives	C12H26N6O3	-
pmp000392	T3_positive	Liguiritigenin-7-O-apioside-4’-O-glucoside	Flavonoids	Flavanones	C26H30O13	-
MEDP1646	T3_positive	Bis(3-aminopropyl)amine	Alcohol and amines	Amines	C6H17N3	C03375
ME0109777	T3_positive	Succinylacetoacetate	Others	Lactones	C8H10O6	-
ME0015225	T3_positive	7-oxo-11-Dodecenoic acid	Lipids	Free fatty acids	C12H20O3	-
ME0107770	T3_positive	Leu-Val-Leu	Amino acids and derivatives	Amino acids and derivatives	C17H33N3O4	-
ME0000744	T3_positive	(5a,6a,8a,11a)-8-Hydroxy-2-oxo-1(10),3-guaiadien-12,6-olide-15-al 8-(4-hydroxyphenylacetate)	Phenolic acids	Phenolic acids	C23H22O7	-
ME0009992	T3_positive	Triphenylphosphine oxide	Benzene and substituted derivatives	Benzene and substituted derivatives	C18H15OP	-
ME0152529	T3_positive	Leu-Trp-Met	Amino acids and derivatives	Amino acids and derivatives	C22H32N4O4S1	-
ME0006686	T3_positive	Cymiazole	Benzene and substituted derivatives	Benzene and substituted derivatives	C12H14N2S	-
MEDN0571	T3_positive	3-Methoxybenzenepropanoic acid	Organic acids	Organic acids	C10H12O3	-
ME0118665	T3_positive	2-Mercaptoimidazole	Heterocyclic compounds	Heterocyclic compounds	C3H4N2S	-
ME0015617	T3_positive	Alfacalcidol	Alcohol and amines	Alcohols	C27H44O2	-
ME0000179	T3_positive	Chelerythrine	Alkaloids	Isoquinoline alkaloids	C21H18NO4+	-
ME0116507	T3_positive	N,N-Dimethyl-1H-imidazole-1-sulfonamide	Heterocyclic compounds	Heterocyclic compounds	C5H9N3O2S	-
ME0106867	T3_positive	Glutaminylproline	Amino acids and derivatives	Amino acids and derivatives	C10H17N3O4	-
ME0156350	T3_positive	Rehmaionoside C	Terpenoids	Terpene	C19H32O8	C17452
ME0157885	T3_positive	Thr-Glu	Amino acids and derivatives	Amino acids and derivatives	C9H16N2O6	-
MEDL02647	T3_positive	moracin I	Phenolic acids	Phenolic acids	C20H20O4	-
MEDP1314	T3_positive	Monoisobutyl phthalate	Others	Lactones	C12H14O4	-
MEDN1399	T3_positive	Benzenebutanoic acid	Organic acids	Organic acids	C10H12O2	-
MEDL00904	T3_positive	2,3-Diaminopropionic acid	Organic acids	Organic acids	C3H8N2O2	C06393
ME0142563	T3_positive	Bila 2185BS	Benzene and substituted derivatives	Benzene and substituted derivatives	C35H46N4O4S	-
ME0000246	T3_positive	Ergocornine	Alkaloids	Alkaloids	C31H39N5O5	C09162
ME0110142	T3_positive	Trp-tyr	Amino acids and derivatives	Amino acids and derivatives	C20H21N3O4	-
MEDL02042	T3_positive	Cianidanol	Flavonoids	Flavanols	C15H14O6	C06562
MEDN0036	T3_positive	L-Alanyl-L-alanine	Amino acids and derivatives	Amino acids and derivatives	C6H12N2O3	-
ME0155665	T3_positive	(2S)-4-[(E)-2-(carboxymethylamino)vinyl]-2,3-dihydropyridine-2,6-dicarboxylic acid	Organic acids	Organic acids	C11H12N2O6	C08566
ME0153630	T3_positive	Met-Phe-Gly	Amino acids and derivatives	Amino acids and derivatives	C16H23N3O4S1	-
ME0108445	T3_positive	N-(4-Hydroxycinnamoyl)tyrosine	Amino acids and derivatives	Amino acids and derivatives	C18H17NO5	-
MEDN1556	T3_positive	L-Allothreonine	Amino acids and derivatives	Amino acids and derivatives	C4H9NO3	C05519
MEDL01957	T3_positive	Longistylin A	Others	Stilbene	C20H22O2	-
ME0105065	T3_positive	3-Hydroxydecanedioic acid	Organic acids	Organic acids	C10H18O5	-
MEDP1138	T3_positive	1-Methylhistamine	Alkaloids	Alkaloids	C6H11N3	C05127
MEDP1093	T3_positive	Allopurinol	Nucleotides and derivatives	Nucleotides and derivatives	C5H4N4O	-
MEDN0576	T3_positive	1,2,3-Trihydroxybenzene	Phenolic acids	Phenolic acids	C6H6O3	C01108
ME0118788	T3_positive	Purine, 6-(o-nitrobenzylthio)-	Benzene and substituted derivatives	Benzene and substituted derivatives	C12H9N5O2S	-
ME0124060	T3_positive	Ethyl 2-amino-4-methylthiazole-5-carboxylate	Others	Lactones	C7H10N2O2S	-
ME0119334	T3_positive	4-(2-Carboxy-ethyl)-3,5-dimethyl-1H-pyrrole-2-carboxylic acid ethyl ester	Organic acids	Organic acids	C12H17NO4	-
ME0150606	T3_positive	Daphnetoxin, 12-((1-oxo-2,4,6-decatrienyl)oxy)-, (12-beta(2E))-	Benzene and substituted derivatives	Benzene and substituted derivatives	C37H42O10	-
MEDP0689	T3_positive	Tranexamic Acid	Organic acids	Organic acids	C8H15NO2	-
ME0015858	T3_positive	Arachidonamide	Lipids	Free fatty acids	C20H33NO	-
MEDP0552	T3_positive	Alantolactone	Terpenoids	Sesquiterpenoids	C15H20O2	C09289
MADN0561	T3_positive	N,N',N''-triacetylchitotriose	Others	Saccharides	C24H41N3O16	-
ME0147057	T3_positive	Cannabisin A	Lignans and Coumarins	Lignans	C34H30N2O8	C17905
MEDP0285	T3_positive	2,6-Diaminooimelic Acid	Organic acids	Organic acids	C7H14N2O4	C00666
MEDP1157	T3_positive	3-Methylindole	Alkaloids	Plumerane	C9H9N	C08313
MEDP1475	T3_positive	N-Methylhydantoin	Heterocyclic compounds	Heterocyclic compounds	C4H6N2O2	C02565
ME0016133	T3_positive	Betamethasone 9,11-Epoxide	Benzene and substituted derivatives	Phenolic acids	C22H28O5	C77355
ME0117493	T3_positive	Thiophene-2-acetamide	Alcohol and amines	Amines	C6H7NOS	-
ME0150458	T3_positive	Gly-Phe-Tyr	Amino acids and derivatives	Amino acids and derivatives	C20H23N3O5	-
MEDN0699	T3_positive	2-Phenylphenol	Phenolic acids	Phenolic acids	C12H10O	C02499
MEDP0364	T3_positive	Hydroxycotinine	Heterocyclic compounds	Heterocyclic compounds	C10H12N2O2	-
ME0142737	T3_positive	3',6'-Dihydroxy-2',4,4'-trimethoxy-chalcone	Others	Ketone compounds	C18H18O6	-
MEDP0745	T3_positive	2-Methoxy-4-methylphenol	Phenolic acids	Phenolic acids	C8H10O2	-
MEDL00860	T3_positive	D-Ornithine	Amino acids and derivatives	Amino acids and derivatives	C5H12N2O2	C00515
ME0123442	T3_positive	Cybutryne	Heterocyclic compounds	Heterocyclic compounds	C11H19N5S	C10927
ME0169766	T3_positive	Resorcinol sulfoxide	Benzene and substituted derivatives	Benzene and substituted derivatives	C12H10O5S	-
ME0003104	T3_positive	3-Phenylpropanal alcohol	Benzene and substituted derivatives	Benzene and substituted derivatives	C9H10O2	-
MEDN0658	T3_positive	Hexadecanedioic acid	Lipids	Free fatty acids	C16H30O4	C19615
MEDN1386	T3_positive	Erythritol	Others	Saccharides	C4H10O4	C00503
MEDL02659	T3_positive	Morachalcone A	Flavonoids	Chalcones	C20H20O5	-
ME0150442	T3_positive	Gly-Phe-Ala	Amino acids and derivatives	Amino acids and derivatives	C14H19N3O4	-
ME0127754	T3_positive	(+)-Medicarpin	Flavonoids	Other Flavonoids	C16H14O4	C01729
ME0009934	T3_positive	Tolbutamide	Benzene and substituted derivatives	Benzene and substituted derivatives	C12H18N2O3S	C07148
ME0006499	T3_positive	Carboxytolbutamide	Benzene and substituted derivatives	Benzene and substituted derivatives	C12H16N2O5S	-
ME0117179	T3_positive	1-Methoxyspirobrassinin	Alkaloids	Plumerane	C12H12N2O2S2	-
MEDN1011	T3_positive	Mannitol	Others	Saccharides	C6H14O6	C00392
MEDP0461	T3_positive	2-Methylguanosine	Nucleotides and derivatives	Nucleotides and derivatives	C11H15N5O5	-
ME0002264	T3_positive	2,4-Dihydroxy-3,6-dimethylbenzoic acid	Benzene and substituted derivatives	Benzene and substituted derivatives	C9H10O4	-
ME0062117	T3_positive	trans-p-Menthane-1,8-diol	Terpenoids	Terpene	C10H20O2	-
ME0150571	T3_positive	Glycophymoline	Heterocyclic compounds	Heterocyclic compounds	C16H14N2O	C10687
ME0000905	T3_positive	[12]-Gingerol	Phenolic acids	Phenolic acids	C23H38O4	-
ME0106686	T3_positive	Etidronic acid	Organic acids	Organic acids	C2H8O7P2	C07736
ME0113238	T3_positive	5-Isopropylbicyclo[3.1.0]hexan-2-one	Others	Ketone compounds	C9H14O	-
ME0150471	T3_positive	Gly-Pro-Ser	Amino acids and derivatives	Amino acids and derivatives	C10H17N3O5	-
ME0108481	T3_positive	N-(tert-Butoxycarbonyl)-L-leucine	Amino acids and derivatives	Amino acids and derivatives	C11H21NO4	C04301
ME0147812	T3_positive	trans-Coumaryl acetate	Benzene and substituted derivatives	Benzene and substituted derivatives	C11H12O3	C20465
ME0125450	T3_positive	N-(6-methoxypyridin-3-yl)-2-(methylsulfanyl)pyridine-3-carboxamide	Alcohol and amines	Amines	C13H13N3O2S	-
ME0134066	T3_positive	Homoeriodictyol (+/-)-	Benzene and substituted derivatives	Benzene and substituted derivatives	C16H14O6	-
ME0108029	T3_positive	Lys-Ala	Amino acids and derivatives	Amino acids and derivatives	C9H19N3O3	-
ME0109834	T3_positive	Thiocysteine	Amino acids and derivatives	Amino acids and derivatives	C3H7NO2S2	C01962
ME0126216	T3_positive	Pranoprofen	Heterocyclic compounds	Heterocyclic compounds	C15H13NO3	-
ME0142738	T3_positive	3,6-Dimethoxy-19-norpregna-1,3,5,7,9-pentaen-20-one	Others	Ketone compounds	C22H26O3	-
ME0126431	T3_positive	Resorcinolnaphthalein	Heterocyclic compounds	Heterocyclic compounds	C24H14O5	-
ME0109811	T3_positive	tert-butyl N-cyclohexylcarbamate	Others	Lactones	C11H21NO2	-
ME0112022	T3_positive	2-(Methylthio)methyl-2-butenal	Others	Aldehyde compounds	C6H10OS	-
ME0053479	T3_positive	Geranic acid	Organic acids	Organic acids	C10H16O2	C16461
ME0114263	T3_positive	Digalacturonate	Others	Saccharides	C12H18O13	C02273
ME0005220	T3_positive	N'-Hydroxy-4-methylbenzenecarboximidamide	Benzene and substituted derivatives	Benzene and substituted derivatives	C8H10N2O	-
MEDP2111	T3_positive	2'-Hydroxy-4,4',6'-trimethoxychalcone	Flavonoids	Chalcones	C18H18O5	-
ME0106248	T3_positive	L-Cysteinyl-L-aspartic acid	Amino acids and derivatives	Amino acids and derivatives	C7H12N2O5S	-
ME0121749	T3_positive	6-(4-methoxyphenyl)-2-thioxo-2,3-dihydropyrimidin-4(1H)-one	Others	Ketone compounds	C11H10N2O2S	-
ME0108337	T3_positive	4-[(E)-2-[2-(4-hydroxyphenyl)ethylamino]vinyl]-2,3-dihydropyridine-2,6-dicarboxylic acid	Organic acids	Organic acids	C17H18N2O5	C08556
ME0127431	T3_positive	Di-1-propenyl sulfide	Others	Others	C6H10S	-
ME0168289	T3_positive	N-Acetyl-S-geranylgeranyl-L-cysteine	Terpenoids	Ditepenoids	C25H41NO3S	-
MEDL01762	T3_positive	Sakuranetin	Flavonoids	Flavanones	C16H14O5	C09833
MEDP1764	T3_positive	Harmaline	Alkaloids	Plumerane	C13H14N2O	C06536
ME0147061	T3_positive	Cannabisin E	Lignans and Coumarins	Lignans	C36H38N2O9	C17909
ME0063313	T3_positive	Reciniferatoxin	Terpenoids	Ditepenoids	C37H40O9	-
MEDN0810	T3_positive	4-Hydroxycyclohexylcarboxylic acid	Organic acids	Organic acids	C7H12O3	-
ME0136999	T3_positive	7-hydroxy-3-(2-methoxyphenyl)-4H-chromen-4-one	Flavonoids	Isoflavones	C16H12O4	-
ME0142271	T3_positive	Pyrimidine-2-carboxylic acid	Nucleotides and derivatives	Nucleotides and derivatives	C5H4N2O2	-
ME0007866	T3_positive	Mycophenolic acid	Organic acids	Organic acids	C17H20O6	C20380
ME0112024	T3_positive	Ethanamine, 2,2'-[oxybis(2,1-ethanediyloxy)]bis-	Alcohol and amines	Amines	C8H20N2O3	-
ME0103623	T3_positive	N6-Methyl-2'-deoxyadenosine	Nucleotides and derivatives	Nucleotides and derivatives	C11H15N5O3	C03795
ME0007935	T3_positive	N-(2,4-Dinitrophenyl)glycine	Benzene and substituted derivatives	Benzene and substituted derivatives	C8H7N3O6	-
ME0111368	T3_positive	Muscarine	Alkaloids	Alkaloids	C9H20NO2+	C07473
ME0001574	T3_positive	Nodinitib-1	Benzene and substituted derivatives	Benzene and substituted derivatives	C14H13N3O2S	C76555
ME0000678	T3_positive	m-Tolylhydrazine	Benzene and substituted derivatives	Benzene and substituted derivatives	C7H10N2	-
MEDL00344	T3_positive	Glycyl-L-tyrosine	Amino acids and derivatives	Amino acids and derivatives	C11H14N2O4	-
ME0011508	T3_positive	(E)-2,6-Dimethyl-2,5-heptadienoic acid	Lipids	Free fatty acids	C9H14O2	-
MEDN0477	T3_positive	2-Oxovaleric acid	Organic acids	Organic acids	C5H8O3	C06255
ME0161667	T3_positive	N-Caffeoyl serotonin	Alcohol and amines	Amines	C19H18N2O4	-
ME0110101	T3_positive	Trp-Asp	Amino acids and derivatives	Amino acids and derivatives	C15H17N3O5	-
ME0168664	T3_positive	7-Hydroxyflavone	Flavonoids	Flavones	C15H10O3	C11264
ME0154649	T3_positive	N-succinyl-LL-2,6-diaminopimelic acid	Organic acids	Organic acids	C11H18N2O7	C04421
MEDN0627	T3_positive	Ellagic acid	Tannins	Tannin	C14H6O8	C10788
ME0015922	T3_positive	Artemisin	Others	Lactones	C15H18O4	C09344
MEDN0311	T3_positive	Dodecanedioic Aicd	Lipids	Free fatty acids	C12H22O4	C02678
ME0005557	T3_positive	5-Aminoimidazole-4-carboxamide	Alcohol and amines	Amines	C4H6N4O	C04051
ME0001208	T3_positive	1-(4-Nitrophenyl)azepane	Benzene and substituted derivatives	Benzene and substituted derivatives	C12H16N2O2	-
ME0110913	T3_positive	Anandamide	Alcohol and amines	Amines	C22H37NO2	C11695
ME0156153	T3_positive	Protogracillin	Steroids	Steroidal saponins	C51H84O23	C08908
ME0129464	T3_positive	Angoletin	Others	Ketone compounds	C18H20O4	-
ME0125562	T3_positive	1-(3-Dimethylamino-propyl)-1H-benzoimidazol-2-ylamine	Alcohol and amines	Amines	C12H18N4	-
MEDN0632	T3_positive	N-oleoylglycine	Alcohol and amines	Amines	C20H37NO3	-
MEDN0060	T3_positive	N-Isovaleroylglycine	Amino acids and derivatives	Amino acids and derivatives	C7H13NO3	-
ME0147726	T3_positive	Colchicoside	Heterocyclic compounds	Heterocyclic compounds	C27H33NO11	C17963
MEDN0038	T3_positive	Oxiglutatione	Amino acids and derivatives	Amino acids and derivatives	C20H32N6O12S2	C00127
MEDN0400	T3_positive	gamma-Linolenic Acid	Lipids	Free fatty acids	C18H30O2	C06426
ME0120544	T3_positive	4-Hydroxydebrisoquine	Heterocyclic compounds	Heterocyclic compounds	C10H13N3O	-
MEDL01844	T3_positive	Capsidiol	Terpenoids	Sesquiterpenoids	C15H24O2	C09627
MEDL02230	T3_positive	Sarsasapogenin	Steroids	Steroid	C27H44O3	C03963
ME0006095	T3_positive	Methyl 2,4-dihydroxy-3,6-dimethylbenzoate	Benzene and substituted derivatives	Benzene and substituted derivatives	C10H12O4	-
ME0000036	T3_positive	Aloperine	Alkaloids	Quinorisidine alkaloids	C15H24N2	-
ME0106137	T3_positive	Chicoric acid	Phenolic acids	Phenolic acids	C22H18O12	C10437
MEDN0581	T3_positive	Imidazoleacetic acid	Alkaloids	Alkaloids	C5H6N2O2	C02835
ME0144829	T3_positive	Ala-leu-ala-leu	Amino acids and derivatives	Amino acids and derivatives	C18H34N4O5	C16459
ME0168659	T3_positive	7,8-DIHYDROXYFLAVONE	Flavonoids	Flavones	C15H10O4	-
ME0116260	T3_positive	Ketone, 3-indolyl piperidinomethyl	Others	Ketone compounds	C15H18N2O	-
ME0155603	T3_positive	Plantagoside	Flavonoids	Flavanones	C21H22O12	C17531
ME0014523	T3_positive	4-Methoxy-3-geranylgeranyl-1,2-dihydroxybenzene	Others	Hydrocarbon derivatives	C27H40O3	-
ME0112097	T3_positive	2-Butoxyethanol	Alcohol and amines	Alcohols	C6H14O2	C19355
MEDP2239	T3_positive	(S)-acenaphthene-coumarol	Benzene and substituted derivatives	Benzene and substituted derivatives	C19H15NO6	-
ME0154353	T3_positive	Nemertelline	Alcohol and amines	Amines	C20H14N4	C17016
ME0135103	T3_positive	6-(hydroxymethyl)-2H-chromen-2-one	Others	Ketone compounds	C10H8O3	-
ME0006401	T3_positive	Bissalicyl fumarate	Benzene and substituted derivatives	Benzene and substituted derivatives	C18H12O8	-
ME0151707	T3_positive	Iminoacetic acid	Organic acids	Organic acids	C2H3NO2	-
ME0146451	T3_positive	Avenacin B-2	Benzene and substituted derivatives	Benzene and substituted derivatives	C54H80O20	C08927
ME0122519	T3_positive	7-Methyladenine	Heterocyclic compounds	Heterocyclic compounds	C6H7N5	C02241
ME0115263	T3_positive	Sedoheptulose 1,7-bisphosphate	Others	Saccharides	C7H16O13P2	C00447
ME0000810	T3_positive	1,1'-Bi-2-naphthol	Benzene and substituted derivatives	Benzene and substituted derivatives	C20H14O2	-
ME0115661	T3_positive	4-Iodo-5-methyl-1H-pyrazol-3-amine	Alcohol and amines	Amines	C4H6IN3	-
ME0012936	T3_positive	1-Oleoyl-2-acetyl-sn-glycerol	Glycerolipids	DG	C23H42O5	-
ZINC14757232	T3_positive	Kaempferol 3,4',7-triacetate	Flavonoids	Flavonols	C21H16O9	-
ME0003394	T3_positive	N-(1,3-benzothiazol-2-yl)-N'-phenylthiourea	Benzene and substituted derivatives	Benzene and substituted derivatives	C14H11N3S2	-
MEDN0225	T3_positive	D-Xylose	Others	Saccharides	C5H10O5	C00181
ME0005020	T3_positive	Hydroxymethyltolbutamide	Benzene and substituted derivatives	Benzene and substituted derivatives	C12H18N2O4S	-
ME0142897	T3_positive	Deoxydihydrostreptomycin	Alcohol and amines	Alcohols	C21H41N7O11	C03755
ME0154710	T3_positive	(2R,3R,4S,5S,6R)-2-[4-[(1R,2S,4S,6R,7S,8R,9S,12S,13S,16S,18R)-16-[(2R,3R,4S,5S,6R)-4,5-dihydroxy-6-(hydroxymethyl)-3-[(2S,3R,4S,5S,6R)-3,4,5-trihydroxy-6-(hydroxymethyl)oxan-2-yl]oxyoxan-2-yl]oxy-6-hydroxy-7,9,13-trimethyl-5-oxapentacyclo[10.8.0.02,9.04,8.013,18]icosan-6-yl]-2-methylbutoxy]-6-(hydroxymethyl)oxane-3,4,5-triol	Steroids	Steroidal saponins	C45H76O19	-
ME0117025	T3_positive	1H-Indole, 3-methyl-1-(trimethylsilyl)-	Alkaloids	Plumerane	C12H17NSi	-
ME0103879	T3_positive	(2S,2'S)-Pyrosaccharopine	Organic acids	Organic acids	C11H18N2O5	-
MEDP1062	T3_positive	Thioacetic-acid-S-methyl-ester	Others	Lactones	C3H6OS	-
MEDL02601	T3_positive	Isopimpinellin	Lignans and Coumarins	Coumarins	C13H10O5	C02162
ME0111704	T3_positive	1,3-Dimethyl-1H-pyrazole-4-carbaldehyde	Heterocyclic compounds	Heterocyclic compounds	C6H8N2O	-
MEDN0280	T3_positive	Taurine	Organic acids	Organic acids	C2H7NO3S	C00245
ME0161110	T3_positive	Adenosine-diphosphate	Nucleotides and derivatives	Nucleotides and derivatives	C10H12N5O10P2-3	-
MEDL02599	T3_positive	Methuyl tanshinonate	Quinones	PhenAnthraquinones	C20H18O5	-
ME0126958	T3_positive	Vulpinic acid	Organic acids	Organic acids	C19H14O5	-
ME0116818	T3_positive	11-(Piperazin-1-yl)dibenzo[b,f][1,4]oxazepine	Benzene and substituted derivatives	Benzene and substituted derivatives	C17H17N3O	-
ME0138892	T3_positive	Dihydrokawain	Others	Lactones	C14H16O3	-
ME0143681	T3_positive	Mycaminosyltylonolide	Heterocyclic compounds	Heterocyclic compounds	C31H51NO10	-
ME0105314	T3_positive	5-Hydroxylysine	Amino acids and derivatives	Amino acids and derivatives	C6H14N2O3	C16741
ME0144277	T3_positive	Acetylpseudotropine	Alkaloids	Tropan alkaloids	C10H17NO2	C12453
ME0010727	T3_positive	(-)-trans-Carveol glucoside	Others	Hydrocarbon derivatives	C16H26O6	-
MEDL00722	T3_positive	Fumaric acid	Organic acids	Organic acids	C4H4O4	C00122
MEDP0773	T3_positive	Norambreinolide	Terpenoids	Ditepenoids	C16H26O2	-
ME0122938	T3_positive	Asparagusic acid	Organic acids	Organic acids	C4H6O2S2	C01892
ME0000300	T3_positive	Ibogaine	Alkaloids	Alkaloids	C20H26N2O	-
MEDN1363	T3_positive	l-Alanyl-l-glutamine	Amino acids and derivatives	Amino acids and derivatives	C8H15N3O4	-
ME0105643	T3_positive	N-arachidonoylglycine	Amino acids and derivatives	Amino acids and derivatives	C22H35NO3	-
ME0001184	T3_positive	Isoproturon-monodemethyl	Benzene and substituted derivatives	Benzene and substituted derivatives	C11H16N2O	-
ME0116274	T3_positive	1-(2,3-Dihydro-1H-pyrrolizin-5-yl)-1,4-pentanedione	Others	Ketone compounds	C12H15NO2	-
ME0154330	T3_positive	Z-Gly-Pro	Benzene and substituted derivatives	Benzene and substituted derivatives	C15H18N2O5	C01632
ME0010804	T3_positive	(+/-)-trans- and cis-4,8-Dimethyl-3,7-nonadien-2-ol	Alcohol and amines	Alcohols	C11H20O	-
ME0012826	T3_positive	1-Hexanol	Alcohol and amines	Alcohols	C6H14O	C00854
ME0146321	T3_positive	Asp-Val-Leu	Amino acids and derivatives	Amino acids and derivatives	C15H27N3O6	-
ME0157704	T3_positive	Thr-Leu-Ile-Arg	Amino acids and derivatives	Amino acids and derivatives	C22H43N7O6	-
ME0134030	T3_positive	5,7-dihydroxy-2-(2,3,4-trihydroxyphenyl)-4H-chromen-4-one	Others	Ketone compounds	C15H10O7	-
ME0158244	T3_positive	Trp-Ser-Phe-Tyr-Leu	Amino acids and derivatives	Amino acids and derivatives	C38H46N6O8	-
ME0138670	T3_positive	kaempferol 7-O-glucoside	Flavonoids	Flavonols	C21H20O11	-
ME0138534	T3_positive	Dactilin	Flavonoids	Flavones	C28H32O17	-
ME0138677	T3_positive	kaempferol 3-O-beta-D-glucopyranosyl-7-O-alpha-L-rhamnopyranoside	Flavonoids	Flavonols	C27H30O15	-
ME0150077	T3_positive	Glu-Lys-Leu-Glu-Ala	Amino acids and derivatives	Amino acids and derivatives	C25H44N6O10	-
ME0152229	T3_positive	Leu-Arg-Lys-Arg	Amino acids and derivatives	Amino acids and derivatives	C24H49N11O5	-
ME0106515	T3_positive	Leucylvaline	Amino acids and derivatives	Amino acids and derivatives	C11H22N2O3	-
ME0150892	T3_positive	His-Gln-Ala	Amino acids and derivatives	Amino acids and derivatives	C14H22N6O5	-
ME0102995	T3_positive	2-[(1R,2R)-3-oxo-2-[(Z)-5-[3,4,5-trihydroxy-6-(hydroxymethyl)oxan-2-yl]oxypent-2-enyl]cyclopentyl]acetic acid	Lipids	Free fatty acids	C18H28O9	-
ME0158206	T3_positive	Trp-Met-His	Amino acids and derivatives	Amino acids and derivatives	C22H28N6O4S1	-
ME0151465	T3_positive	Ile-Ile-Arg-Ser-Ser	Amino acids and derivatives	Amino acids and derivatives	C24H46N8O8	-
ME0131126	T3_positive	3-(3,4-Dihydroxyphenyl)prop-2-enoic acid	Organic acids	Organic acids	C9H8O4	-
ME0159084	T3_positive	Val-Lys-Arg-Arg	Amino acids and derivatives	Amino acids and derivatives	C23H47N11O5	-
ME0145904	T3_positive	Asn-Thr-His	Amino acids and derivatives	Amino acids and derivatives	C14H22N6O6	-
ME0152218	T3_positive	Leu-Arg-Asp-Leu-Tyr	Amino acids and derivatives	Amino acids and derivatives	C31H50N8O9	-
ME0108413	T3_positive	N-Phenethylacetamide	Benzene and substituted derivatives	Benzene and substituted derivatives	C10H13NO	C06746
ME0131753	T3_positive	Oroxylin A-7-o-beta-D-glucuronide	Organic acids	Organic acids	C22H20O11	-
ME0110256	T3_positive	Tyr-His	Amino acids and derivatives	Amino acids and derivatives	C15H18N4O4	-
ME0149708	T3_positive	Gln-His-Thr-Leu-Lys	Amino acids and derivatives	Amino acids and derivatives	C27H47N9O8	-
MEDL01789	T3_positive	4-O-Methylgallic acid	Phenolic acids	Phenolic acids	C8H8O5	-
MEDL00404	T3_positive	2-Palmitoyl-rac-glycerol	Glycerolipids	DG	C19H38O4	-
ME0159036	T3_positive	Val-Ile-Asp-Lys	Amino acids and derivatives	Amino acids and derivatives	C21H39N5O7	-
ME0152456	T3_positive	Leu-Phe-Ser	Amino acids and derivatives	Amino acids and derivatives	C18H27N3O5	-
ME0155222	T3_positive	Phe-Ile-Asp-Leu-Asn	Amino acids and derivatives	Amino acids and derivatives	C29H44N6O9	-
ME0158928	T3_positive	Val-Asn-Tyr-Val-Asn	Amino acids and derivatives	Amino acids and derivatives	C27H41N7O9	-
ME0149752	T3_positive	Gln-Leu-Val-Arg-Ala	Amino acids and derivatives	Amino acids and derivatives	C25H47N9O7	-
ME0130152	T3_positive	2-(3,4-dihydroxyphenyl)-5,7-dihydroxy-3-[(2S,3R,4S,5S,6R)-3,4,5-trihydroxy-6-(hydroxymethyl)oxan-2-yl]oxychromen-4-one	Others	Ketone compounds	C21H20O12	-
ME0109302	T3_positive	Pro-Ala-Arg	Amino acids and derivatives	Amino acids and derivatives	C14H26N6O4	-
ME0152282	T3_positive	Leu-Gln-Arg-Arg	Amino acids and derivatives	Amino acids and derivatives	C23H45N11O6	-
ME0147993	T3_positive	Cys-Asp-Val	Amino acids and derivatives	Amino acids and derivatives	C12H21N3O6S1	-
ME0126993	T3_positive	xi-Tetrahydro-6-propyl-2H-pyran-2-one	Others	Ketone compounds	C8H14O2	-
ME0151015	T3_positive	His-Lys-Leu-Val-Val	Amino acids and derivatives	Amino acids and derivatives	C28H50N8O6	-
ME0156904	T3_positive	Ser-Ser-Asn	Amino acids and derivatives	Amino acids and derivatives	C10H18N4O7	-
ME0158232	T3_positive	Trp-Pro-Ser	Amino acids and derivatives	Amino acids and derivatives	C19H24N4O5	-
ME0146296	T3_positive	Asp-Tyr-Asn-Leu-Leu	Amino acids and derivatives	Amino acids and derivatives	C29H44N6O10	-
ME0155258	T3_positive	Phe-Leu-Trp	Amino acids and derivatives	Amino acids and derivatives	C26H32N4O4	-
ME0149863	T3_positive	Gln-Val-Leu-Arg	Amino acids and derivatives	Amino acids and derivatives	C22H42N8O6	-
ME0150401	T3_positive	Gly-Leu-Asp-Val-Trp	Amino acids and derivatives	Amino acids and derivatives	C28H40N6O8	-
ME0150117	T3_positive	Glu-Phe-Tyr-Tyr-Arg	Amino acids and derivatives	Amino acids and derivatives	C38H48N8O10	-
ME0150368	T3_positive	Gly-Gly-Lys-Pro-Asn	Amino acids and derivatives	Amino acids and derivatives	C19H33N7O7	-
ME0146012	T3_positive	Asp-Ala-Thr-Glu	Amino acids and derivatives	Amino acids and derivatives	C16H26N4O10	-
ME0145485	T3_positive	Arg-Pro-Pro-Ser-Phe	Amino acids and derivatives	Amino acids and derivatives	C28H42N8O7	-
ME0151650	T3_positive	Ile-Val-Leu-Glu	Amino acids and derivatives	Amino acids and derivatives	C22H40N4O7	-
ME0152889	T3_positive	Lys-Asn-Lys-Glu-Ser	Amino acids and derivatives	Amino acids and derivatives	C24H44N8O10	-
ME0146110	T3_positive	Asp-Glu-Val-Phe-Asp	Amino acids and derivatives	Amino acids and derivatives	C27H37N5O12	-
ME0144687	T3_positive	Ala-Phe-Gln-Lys	Amino acids and derivatives	Amino acids and derivatives	C23H36N6O6	-
ME0151214	T3_positive	HoPhe-HoPhe-OH	Others	Lactones	C25H24N2O6	-
ME0158264	T3_positive	Trp-Trp-Glu	Amino acids and derivatives	Amino acids and derivatives	C27H29N5O6	-
ME0150216	T3_positive	Glu-Val-Phe-Asp-Glu	Amino acids and derivatives	Amino acids and derivatives	C28H39N5O12	-
ME0130459	T3_positive	Methyl 2,5-dihydroxycinnamate	Organic acids	Organic acids	C10H10O4	-
ME0155865	T3_positive	Pro-Gly-Glu-Cys-Leu	Amino acids and derivatives	Amino acids and derivatives	C21H35N5O8S	-
ME0155368	T3_positive	Phe-Trp-Gly	Amino acids and derivatives	Amino acids and derivatives	C22H24N4O4	-
ME0149782	T3_positive	Gln-Phe-Leu-Glu	Amino acids and derivatives	Amino acids and derivatives	C25H37N5O8	-
ME0152913	T3_positive	Lys-Asp-Trp	Amino acids and derivatives	Amino acids and derivatives	C21H29N5O6	-
ME0152490	T3_positive	Leu-Ser-His-Asp	Amino acids and derivatives	Amino acids and derivatives	C19H30N6O8	-
ME0054380	T3_positive	Ethyl alpha-linolenate	Lipids	Free fatty acids	C20H34O2	-
ME0106525	T3_positive	D-Phenylalanine	Organic acids	Organic acids	C9H11NO2	C02057
ME0152497	T3_positive	Leu-Ser-Phe-Gln-Asp	Amino acids and derivatives	Amino acids and derivatives	C27H40N6O10	-
ME0150398	T3_positive	Gly-Leu-Arg-Val-Phe	Amino acids and derivatives	Amino acids and derivatives	C28H46N8O6	-
ME0000473	T3_positive	tropinone	Alkaloids	Tropan alkaloids	C8H13NO	C00783
ME0156776	T3_positive	Ser-His-His-Val-Ala	Amino acids and derivatives	Amino acids and derivatives	C23H35N9O7	-
ME0144508	T3_positive	Ala-Asp-Arg-Arg	Amino acids and derivatives	Amino acids and derivatives	C19H36N10O7	-
ME0156907	T3_positive	Ser-Ser-Glu	Amino acids and derivatives	Amino acids and derivatives	C11H19N3O8	-
ME0155114	T3_positive	Phe-Asn-Thr-Lys	Amino acids and derivatives	Amino acids and derivatives	C23H36N6O7	-
ME0158611	T3_positive	Tyr-Ser-Thr	Amino acids and derivatives	Amino acids and derivatives	C16H23N3O7	-
ME0155391	T3_positive	Phe-Tyr-Phe-Lys-Ile	Amino acids and derivatives	Amino acids and derivatives	C39H52N6O7	-
ME0012817	T3_positive	1-Hexadecyl-sn-glycerol 3-phosphate	Glycerophospholipids	LPA	C19H41O6P	-
ME0108732	T3_positive	N-Pentadecylcyclohexanecarboxamide	Alcohol and amines	Amines	C22H43NO	-
ME0109230	T3_positive	Phe-Thr	Amino acids and derivatives	Amino acids and derivatives	C13H18N2O4	-
ME0011736	T3_positive	11-Ketorockogenin acetate	Others	Lactones	C31H46O7	-
ME0153149	T3_positive	Lys-Thr-Glu-Lys-Ala	Amino acids and derivatives	Amino acids and derivatives	C24H45N7O9	-
ME0158972	T3_positive	Val-Gln-Met-Met-Thr	Amino acids and derivatives	Amino acids and derivatives	C24H44N6O8S2	-
ME0151662	T3_positive	Ile-Abu-OH	Amino acids and derivatives	Amino acids and derivatives	C15H20N2O6	-
ME0148078	T3_positive	Cys-Trp-Thr	Amino acids and derivatives	Amino acids and derivatives	C18H24N4O5S1	-
ME0157683	T3_positive	Thr-Ile-Glu-Ile-Ile	Amino acids and derivatives	Amino acids and derivatives	C27H49N5O9	-
ME0152271	T3_positive	Leu-Asp-Tyr-Arg-Glu	Amino acids and derivatives	Amino acids and derivatives	C30H46N8O11	-
ME0146214	T3_positive	Asp-Phe-Ala	Amino acids and derivatives	Amino acids and derivatives	C16H21N3O6	-
ME0153048	T3_positive	Lys-Leu-Thr-Arg	Amino acids and derivatives	Amino acids and derivatives	C22H44N8O6	-
ME0159020	T3_positive	Val-His-Glu-Lys-Ala	Amino acids and derivatives	Amino acids and derivatives	C25H42N8O8	-
ME0144011	T3_positive	8(9)-EET methyl ester	Fatty acyl	Others	C21H34O3	-
ME0159146	T3_positive	Val-Pro-Trp	Amino acids and derivatives	Amino acids and derivatives	C21H28N4O4	-
ME0147962	T3_positive	Cymathere lactone	Amino acids and derivatives	Amino acids and derivatives	C18H26O3	-
ME0155873	T3_positive	Pro-Gly-Val	Amino acids and derivatives	Amino acids and derivatives	C12H21N3O4	-
ME0152974	T3_positive	Lys-Gly-Gln-Lys-Val	Amino acids and derivatives	Amino acids and derivatives	C24H46N8O7	-
ME0145477	T3_positive	Arg-Pro-Asp	Amino acids and derivatives	Amino acids and derivatives	C15H26N6O6	-
ME0144721	T3_positive	Ala-Pro-Trp	Amino acids and derivatives	Amino acids and derivatives	C19H24N4O4	-
ME0150819	T3_positive	His-Ala-Leu	Amino acids and derivatives	Amino acids and derivatives	C15H25N5O4	-
ME0145884	T3_positive	Asn-Ser-Glu-Asp-Thr	Amino acids and derivatives	Amino acids and derivatives	C20H32N6O13	-
ME0108182	T3_positive	Met-Val-Arg	Amino acids and derivatives	Amino acids and derivatives	C16H32N6O4S1	-
ME0150914	T3_positive	His-Glu-Gln	Amino acids and derivatives	Amino acids and derivatives	C16H24N6O7	-
ME0150986	T3_positive	His-Leu-Asp-Gln-Gln	Amino acids and derivatives	Amino acids and derivatives	C26H41N9O10	-
ME0145967	T3_positive	Asn-Arg-Cys-Ser-Gln-Gly-Ser-Cys-Trp-Asn(Disulfide Bridge 3-8)	Amino acids and derivatives	Amino acids and derivatives	C44H65N17O16S2	-
ME0154729	T3_positive	Oleoyl Ethanolamide-d4	Lipids	Free fatty acids	C20H35D4NO2	-
ME0155190	T3_positive	Phe-Glu-Trp	Amino acids and derivatives	Amino acids and derivatives	C25H28N4O6	-
ME0156981	T3_positive	Ser-Val-Lys-Arg	Amino acids and derivatives	Amino acids and derivatives	C20H40N8O6	-
ME0110180	T3_positive	Tumonoic acid I	Organic acids	Organic acids	C27H47NO7	-
ME0159263	T3_positive	Val-Glu	Amino acids and derivatives	Amino acids and derivatives	C10H18N2O5	-
ME0156956	T3_positive	Ser-Tyr-His	Amino acids and derivatives	Amino acids and derivatives	C18H23N5O6	-
ME0158991	T3_positive	Val-Glu-Leu-Asp	Amino acids and derivatives	Amino acids and derivatives	C20H34N4O9	-
ME0152487	T3_positive	Leu-Ser-Glu-Lys-Tyr	Amino acids and derivatives	Amino acids and derivatives	C29H46N6O10	-
ME0153513	T3_positive	Met-Asp-Gln	Amino acids and derivatives	Amino acids and derivatives	C14H24N4O7S1	-
ME0157545	T3_positive	Thr-Arg-Gln-Glu	Amino acids and derivatives	Amino acids and derivatives	C20H36N8O9	-
ME0158563	T3_positive	Tyr-Phe-Asp	Amino acids and derivatives	Amino acids and derivatives	C22H25N3O7	-
ME0156039	T3_positive	Pro-Tyr-Tyr	Amino acids and derivatives	Amino acids and derivatives	C23H27N3O6	-
ME0156718	T3_positive	Ser-Gln-Tyr-Lys	Amino acids and derivatives	Amino acids and derivatives	C23H36N6O8	-
ME0152337	T3_positive	Leu-Gly-Arg-Leu-Val	Amino acids and derivatives	Amino acids and derivatives	C25H48N8O6	-
ME0158942	T3_positive	Val-Asp-Pro-Val-Asn	Amino acids and derivatives	Amino acids and derivatives	C23H38N6O9	-
ME0158562	T3_positive	Tyr-Phe-Asn	Amino acids and derivatives	Amino acids and derivatives	C22H26N4O6	-
ME0006821	T3_positive	Diethyl phthalate	Benzene and substituted derivatives	Benzene and substituted derivatives	C12H14O4	C14175
ME0168290	T3_positive	Isoleucylleucine	Amino acids and derivatives	Amino acids and derivatives	C12H24N2O3	-
ME0107281	T3_positive	His-Val-Lys	Amino acids and derivatives	Amino acids and derivatives	C17H30N6O4	-
ME0145258	T3_positive	Arg-Arg-Asn	Amino acids and derivatives	Amino acids and derivatives	C16H32N10O5	-
ME0148062	T3_positive	Cys-Pro-His	Amino acids and derivatives	Amino acids and derivatives	C14H21N5O4S1	-
ME0131331	T3_positive	3-(4-Hydroxy-3-methoxyphenyl)-2-propenoic acid	Organic acids	Organic acids	C10H10O4	-
ME0009143	T3_positive	Norbuprenorphine	Benzene and substituted derivatives	Benzene and substituted derivatives	C25H35NO4	-
ME0151436	T3_positive	Ile-Gly-Lys-Ile-Phe	Amino acids and derivatives	Amino acids and derivatives	C29H48N6O6	-
MEDP1537	T3_positive	4-Hydroxy-L-glutamic acid	Amino acids and derivatives	Amino acids and derivatives	C5H9NO5	C03079
ME0110074	T3_positive	Trp-Lys-Lys	Amino acids and derivatives	Amino acids and derivatives	C23H36N6O4	-
ME0105652	T3_positive	Arg-Gln-Arg	Amino acids and derivatives	Amino acids and derivatives	C17H34N10O5	-
ME0139530	T3_positive	Quercetin 3-xylosyl-(1->6)-glucoside	Flavonoids	Flavones	C26H28O16	-
ME0153694	T3_positive	Met-Trp-Trp	Amino acids and derivatives	Amino acids and derivatives	C27H31N5O4S1	-
ME0159048	T3_positive	Val-Ile-Thr	Amino acids and derivatives	Amino acids and derivatives	C15H29N3O5	-
ME0151482	T3_positive	Ile-Leu-Ala-Asp	Amino acids and derivatives	Amino acids and derivatives	C19H34N4O7	-
ME0158702	T3_positive	TyrMe-His-OH	Amino acids and derivatives	Amino acids and derivatives	C22H22N4O7	-
ME0158670	T3_positive	Tyr-Val-Lys-Ala-Leu	Amino acids and derivatives	Amino acids and derivatives	C29H48N6O7	-
ME0158169	T3_positive	Trp-His-Tyr	Amino acids and derivatives	Amino acids and derivatives	C26H28N6O5	-
ME0149775	T3_positive	Gln-Phe-Glu-Lys	Amino acids and derivatives	Amino acids and derivatives	C25H38N6O8	-
ME0104237	T3_positive	1-Aminocyclohexanecarboxylic acid	Benzene and substituted derivatives	Benzene and substituted derivatives	C7H13NO2	-
ME0155177	T3_positive	Phe-Glu-His	Amino acids and derivatives	Amino acids and derivatives	C20H25N5O6	-
ME0147998	T3_positive	Cys-Gln-Gln	Amino acids and derivatives	Amino acids and derivatives	C13H23N5O6S1	-
ME0158372	T3_positive	Tyr-Arg-Gln-Arg	Amino acids and derivatives	Amino acids and derivatives	C26H43N11O7	-
ME0106918	T3_positive	Glu-Phe-Arg	Amino acids and derivatives	Amino acids and derivatives	C20H30N6O6	-
ME0150915	T3_positive	His-Glu-Gln-Lys	Amino acids and derivatives	Amino acids and derivatives	C22H36N8O8	-
ME0156748	T3_positive	Ser-Glu-Val-Lys-Met	Amino acids and derivatives	Amino acids and derivatives	C24H44N6O9S	-
ME0154307	T3_positive	Naringenin-7-O--D-Glucuronide	Flavonoids	Flavones	C21H20O11	-
ME0109387	T3_positive	Prolylhistidine	Amino acids and derivatives	Amino acids and derivatives	C11H16N4O3	-
ME0155310	T3_positive	Phe-Pro-Asn	Amino acids and derivatives	Amino acids and derivatives	C18H24N4O5	-
ME0058413	T3_positive	1-(9Z-nonadecenoyl)-glycero-3-phosphoethanolamine	Glycerophospholipids	PE	C24H48NO7P	-
ME0145900	T3_positive	Asn-Thr-Gln-Glu	Amino acids and derivatives	Amino acids and derivatives	C18H30N6O10	-
ME0149945	T3_positive	Glu-Asp-Gln-Asp	Amino acids and derivatives	Amino acids and derivatives	C18H27N5O12	-
ME0151103	T3_positive	His-Thr-Ser-Asp	Amino acids and derivatives	Amino acids and derivatives	C17H26N6O9	-
ME0152997	T3_positive	Lys-His-Tyr	Amino acids and derivatives	Amino acids and derivatives	C21H30N6O5	-
ME0109144	T3_positive	Phe-Val-Arg	Amino acids and derivatives	Amino acids and derivatives	C20H32N6O4	-
ME0152388	T3_positive	Leu-Ile-Val	Amino acids and derivatives	Amino acids and derivatives	C17H33N3O4	-
ME0106870	T3_positive	Glutaminyl-threonine	Amino acids and derivatives	Amino acids and derivatives	C9H17N3O5	-
ME0001379	T3_positive	1,5-Naphthalenediamine	Benzene and substituted derivatives	Benzene and substituted derivatives	C10H10N2	C19463
ME0152225	T3_positive	Leu-Arg-Gly-Pro-Ser	Amino acids and derivatives	Amino acids and derivatives	C22H40N8O7	-
ME0145850	T3_positive	Asn-Phe-Ala-Arg	Amino acids and derivatives	Amino acids and derivatives	C22H34N8O6	-
ME0152387	T3_positive	Leu-Ile-Tyr-Thr-Asn	Amino acids and derivatives	Amino acids and derivatives	C29H46N6O9	-
ME0146151	T3_positive	Asp-Ile-Lys-Asp	Amino acids and derivatives	Amino acids and derivatives	C20H35N5O9	-
ME0110992	T3_positive	Dicyclohexylamine	Alcohol and amines	Amines	C12H23N	C14686
ME0145501	T3_positive	Arg-Ser-Phe	Amino acids and derivatives	Amino acids and derivatives	C18H28N6O5	-
ME0126941	T3_positive	Vasicinone	Others	Ketone compounds	C11H10N2O2	-
ME0107369	T3_positive	Hoiamide C	Alcohol and amines	Amines	C37H62N4O7S3	-
ME0155792	T3_positive	Pro-Asn-Asp	Amino acids and derivatives	Amino acids and derivatives	C13H20N4O7	-
ME0152293	T3_positive	Leu-Gln-Ile-Arg	Amino acids and derivatives	Amino acids and derivatives	C23H44N8O6	-
ME0107713	T3_positive	Leu-Asp-Lys	Amino acids and derivatives	Amino acids and derivatives	C16H30N4O6	-
ME0152547	T3_positive	Leu-Tyr-Phe-Lys	Amino acids and derivatives	Amino acids and derivatives	C30H43N5O6	-
ME0009501	T3_positive	p-Phenetidine	Phenolic acids	Phenolic acids	C8H11NO	-
ME0153004	T3_positive	Lys-Ile-Asp	Amino acids and derivatives	Amino acids and derivatives	C16H30N4O6	-
ME0144803	T3_positive	Ala-Val-Lys-Arg	Amino acids and derivatives	Amino acids and derivatives	C20H40N8O5	-
ME0105075	T3_positive	3-Oxovalproic acid	Organic acids	Organic acids	C8H14O3	C16652
ME0139667	T3_positive	Schisandrin	Heterocyclic compounds	Heterocyclic compounds	C24H32O7	C17064
ME0109115	T3_positive	Phe-Ile-Lys	Amino acids and derivatives	Amino acids and derivatives	C21H34N4O4	-
ME0131241	T3_positive	3-(3-hydroxy-4-methoxyphenyl)propanoic acid	Organic acids	Organic acids	C10H12O4	-
ME0153199	T3_positive	Lys-Val-Gly	Amino acids and derivatives	Amino acids and derivatives	C13H26N4O4	-
ME0110983	T3_positive	D-erythro-Sphingosine C-20	Sphingolipids	SPH	C20H41NO2	-
ME0150905	T3_positive	His-Gln-Thr	Amino acids and derivatives	Amino acids and derivatives	C15H24N6O6	-
ME0107715	T3_positive	Leu-Cys-Arg	Amino acids and derivatives	Amino acids and derivatives	C15H30N6O4S1	-
ME0109129	T3_positive	Phe-Pro-Glu	Amino acids and derivatives	Amino acids and derivatives	C19H25N3O6	-
ME0011908	T3_positive	Dioleoyl phosphatidylserine	Glycerophospholipids	PS	C42H78NO10P	-
ME0155896	T3_positive	Pro-Ile-His-Asp-Arg	Amino acids and derivatives	Amino acids and derivatives	C27H44N10O8	-
ME0153867	T3_positive	Met-Met	Amino acids and derivatives	Amino acids and derivatives	C10H20N2O3S2	-
ME0005085	T3_positive	4-Hydroxyamphetamine	Benzene and substituted derivatives	Benzene and substituted derivatives	C9H13NO	-
ME0110372	T3_positive	Val-Trp-Gln	Amino acids and derivatives	Amino acids and derivatives	C21H29N5O5	-
ME0151127	T3_positive	His-Tyr-Glu	Amino acids and derivatives	Amino acids and derivatives	C20H25N5O7	-
ME0155370	T3_positive	Phe-Trp-Leu	Amino acids and derivatives	Amino acids and derivatives	C26H32N4O4	-
ME0150593	T3_positive	Gly-Pro-Ala	Amino acids and derivatives	Amino acids and derivatives	C10H17N3O4	-
ME0109304	T3_positive	Pro-Asn	Amino acids and derivatives	Amino acids and derivatives	C9H15N3O4	-
MEDN1720	T3_positive	Monobenzyl phthalate	Benzene and substituted derivatives	Benzene and substituted derivatives	C15H12O4	-
ME0108729	T3_positive	(S,Z)-N-(2-Oxotetrahydrofuran-3-yl)tetradec-9-enamide	Others	Lactones	C18H31NO3	-
ME0009362	T3_positive	Pentylone	Benzene and substituted derivatives	Benzene and substituted derivatives	C13H17NO3	-
ME0155188	T3_positive	Phe-Glu-Ser-Phe-Gly	Amino acids and derivatives	Amino acids and derivatives	C28H35N5O9	-
ME0110192	T3_positive	Tyr-Asp-Lys	Amino acids and derivatives	Amino acids and derivatives	C19H28N4O7	-
ME0146052	T3_positive	Asp-Asp-Glu	Amino acids and derivatives	Amino acids and derivatives	C13H19N3O10	-
ME0110098	T3_positive	Trp-Asn	Amino acids and derivatives	Amino acids and derivatives	C15H18N4O4	-
ME0146217	T3_positive	Asp-Phe-Gln-Arg	Amino acids and derivatives	Amino acids and derivatives	C24H36N8O8	-
ME0151338	T3_positive	Ile-Arg-Thr-Asp	Amino acids and derivatives	Amino acids and derivatives	C20H37N7O8	-
ME0153076	T3_positive	Lys-Met-His	Amino acids and derivatives	Amino acids and derivatives	C17H30N6O4S1	-
ME0002109	T3_positive	2,3,4-Trihydroxy-4'-ethoxybenzophenone	Benzene and substituted derivatives	Benzene and substituted derivatives	C15H14O5	-
ME0144505	T3_positive	Ala-Asn-Val	Amino acids and derivatives	Amino acids and derivatives	C12H22N4O5	-
ME0107916	T3_positive	L-N5-(1-Imino-3-pentenyl) ornithine	Amino acids and derivatives	Amino acids and derivatives	C10H19N3O2	-
ME0105773	T3_positive	Asn-Glu-Arg	Amino acids and derivatives	Amino acids and derivatives	C15H27N7O7	-
ME0150890	T3_positive	His-Cys-Tyr	Amino acids and derivatives	Amino acids and derivatives	C18H23N5O5S1	-
ME0106822	T3_positive	Gln-Phe-Lys	Amino acids and derivatives	Amino acids and derivatives	C20H31N5O5	-
ME0156675	T3_positive	Ser-Asp-Arg-Asp	Amino acids and derivatives	Amino acids and derivatives	C17H29N7O10	-
ME0011860	T3_positive	1,2-Dimyristoleoyl-sn-glycero-3-phosphocholine	Glycerophospholipids	PC	C36H68NO8P	-
ME0114753	T3_positive	Inflatine	Alkaloids	Alkaloids	C22H27NO2	-
ME0115094	T3_positive	p-Cresol glucuronide	Benzene and substituted derivatives	Benzene and substituted derivatives	C13H16O7	-
ME0109124	T3_positive	Phe-Phe-Arg	Amino acids and derivatives	Amino acids and derivatives	C24H32N6O4	-
ME0150223	T3_positive	Glu-Val-Tyr-Asp	Amino acids and derivatives	Amino acids and derivatives	C23H32N4O10	-
ME0105481	T3_positive	Ala-Pro-Glu	Amino acids and derivatives	Amino acids and derivatives	C13H21N3O6	-
ME0154289	T3_positive	Nap-Met-OH	Amino acids and derivatives	Amino acids and derivatives	C23H22N2O6S	-
ME0148348	T3_positive	D-galactaro-1,4-lactone	Others	Ketone compounds	C6H8O7	C20896
ME0158282	T3_positive	Trp-Val-Arg	Amino acids and derivatives	Amino acids and derivatives	C22H33N7O4	-
ME0009986	T3_positive	Trimidox	Phenolic acids	Phenolic acids	C7H8N2O4	-
ME0159228	T3_positive	Val-Tyr-Thr	Amino acids and derivatives	Amino acids and derivatives	C18H27N3O6	-
ME0150927	T3_positive	His-Glu-Thr	Amino acids and derivatives	Amino acids and derivatives	C15H23N5O7	-
ME0106261	T3_positive	Cys-Leu-Lys	Amino acids and derivatives	Amino acids and derivatives	C15H30N4O4S1	-
MADN0522	T3_positive	4-Acetamidobenzoic acid	Benzene and substituted derivatives	Benzene and substituted derivatives	C9H9NO3	-
ME0155789	T3_positive	Pro-Asn-Ala	Amino acids and derivatives	Amino acids and derivatives	C12H20N4O5	-
ME0158533	T3_positive	Tyr-Lys-Arg-Glu	Amino acids and derivatives	Amino acids and derivatives	C26H42N8O8	-
ME0155359	T3_positive	Phe-Thr-Ser-Lys	Amino acids and derivatives	Amino acids and derivatives	C22H35N5O7	-
ME0150952	T3_positive	His-His-Ala-Ala-Tyr	Amino acids and derivatives	Amino acids and derivatives	C27H35N9O7	-
ME0151036	T3_positive	His-Phe-Arg-Asp	Amino acids and derivatives	Amino acids and derivatives	C25H35N9O7	-
ME0149388	T3_positive	Gal1-4[Fuc1-3]GlcNAcSp	Others	Saccharides	C22H38N4O15	-
ME0156974	T3_positive	Ser-Val-Gln-Glu-Ser	Amino acids and derivatives	Amino acids and derivatives	C21H36N6O11	-
ME0155975	T3_positive	Pro-Pro-Glu	Amino acids and derivatives	Amino acids and derivatives	C15H23N3O6	-
ME0109308	T3_positive	Pro-Asp-Arg	Amino acids and derivatives	Amino acids and derivatives	C15H26N6O6	-
ME0108170	T3_positive	Met-Phe-Arg	Amino acids and derivatives	Amino acids and derivatives	C20H32N6O4S1	-
ME0150362	T3_positive	Gly-Glu-Tyr-Ser-Val	Amino acids and derivatives	Amino acids and derivatives	C24H35N5O10	-
ME0108177	T3_positive	Met-Trp-Arg	Amino acids and derivatives	Amino acids and derivatives	C22H33N7O4S1	-
ME0145354	T3_positive	Arg-Glu-Ser-Leu-Glu	Amino acids and derivatives	Amino acids and derivatives	C25H44N8O11	-
ME0151444	T3_positive	Ile-His-Ala-Glu	Amino acids and derivatives	Amino acids and derivatives	C20H32N6O7	-
ME0155973	T3_positive	Pro-Pro-Asp-Gln-Gln	Amino acids and derivatives	Amino acids and derivatives	C24H37N7O10	-
ME0155119	T3_positive	Phe-Asp-Ala-Glu	Amino acids and derivatives	Amino acids and derivatives	C21H28N4O9	-
ME0150281	T3_positive	Gly-Ala-Arg-Ala-Glu	Amino acids and derivatives	Amino acids and derivatives	C19H34N8O8	-
ME0156644	T3_positive	Ser-Arg-Ile-Lys	Amino acids and derivatives	Amino acids and derivatives	C21H42N8O6	-
ME0145462	T3_positive	Arg-Phe-Glu	Amino acids and derivatives	Amino acids and derivatives	C20H30N6O6	-
ME0108562	T3_positive	Phenylbutyrylglutamine	Alcohol and amines	Amines	C15H20N2O4	-
ME0150134	T3_positive	Glu-Ser-Arg-Asp	Amino acids and derivatives	Amino acids and derivatives	C18H31N7O10	-
ME0157788	T3_positive	Thr-Pro-Ser-Cys-Asn	Amino acids and derivatives	Amino acids and derivatives	C19H32N6O9S	-
ME0150989	T3_positive	His-Leu-Glu	Amino acids and derivatives	Amino acids and derivatives	C17H27N5O6	-
ME0000338	T3_positive	(4R,7S,7aR,12bS)-3-methyl-2,4,4a,7,7a,13-hexahydro-1H-4,12-methanobenzofuro[3,2-e]isoquinoline-7,9-diol	Alkaloids	Isoquinoline alkaloids	C17H19NO3	-
ME0158641	T3_positive	Tyr-Trp-Ser	Amino acids and derivatives	Amino acids and derivatives	C23H26N4O6	-
ME0150149	T3_positive	Glu-Ser-Thr-Lys	Amino acids and derivatives	Amino acids and derivatives	C18H33N5O9	-
ME0052784	T3_positive	(1R,4R,5R,7R,8R,11R,17S,18S)-4,5,7,8,17-pentahydroxy-14,18-dimethyl-6-methylidene-3,10-dioxapentacyclo[9.8.0.01,7.04,19.013,18]nonadec-14-ene-9,16-dione	Others	Ketone compounds	C20H24O9	-
ME0158995	T3_positive	Val-Glu-Phe-Asp	Amino acids and derivatives	Amino acids and derivatives	C23H32N4O9	-
ME0156042	T3_positive	Pro-Val-Ala-Glu-Val	Amino acids and derivatives	Amino acids and derivatives	C23H39N5O8	-
ME0158608	T3_positive	Tyr-Ser-Lys-Glu-Ala	Amino acids and derivatives	Amino acids and derivatives	C26H40N6O10	-
ME0155992	T3_positive	Pro-Ser-Ile	Amino acids and derivatives	Amino acids and derivatives	C14H25N3O5	-
ME0157799	T3_positive	Thr-Ser-Gly	Amino acids and derivatives	Amino acids and derivatives	C9H17N3O6	-
ME0155378	T3_positive	Phe-Tyr-Asn-Glu	Amino acids and derivatives	Amino acids and derivatives	C27H33N5O9	-
ME0145864	T3_positive	Asn-Phe-Ser-Arg	Amino acids and derivatives	Amino acids and derivatives	C22H34N8O7	-
ME0150871	T3_positive	His-Asp-Glu	Amino acids and derivatives	Amino acids and derivatives	C15H21N5O8	-
ME0158143	T3_positive	Trp-Glu-Glu	Amino acids and derivatives	Amino acids and derivatives	C21H26N4O8	-
ME0158579	T3_positive	Tyr-Phe-Trp	Amino acids and derivatives	Amino acids and derivatives	C29H30N4O5	-
ME0153138	T3_positive	Lys-Ser-Thr-Leu-Thr	Amino acids and derivatives	Amino acids and derivatives	C23H44N6O9	-
ME0145340	T3_positive	Arg-Glu-Arg-Val-Tyr	Amino acids and derivatives	Amino acids and derivatives	C31H51N11O9	-
ME0155867	T3_positive	Pro-Gly-Ile	Amino acids and derivatives	Amino acids and derivatives	C13H23N3O4	-
ME0116559	T3_positive	Tryptoline	Alkaloids	Plumerane	C11H12N2	-
ME0156909	T3_positive	Ser-Ser-Gly-Arg-Ser	Amino acids and derivatives	Amino acids and derivatives	C17H32N8O9	-
ME0107448	T3_positive	Ile-Leu-Asn	Amino acids and derivatives	Amino acids and derivatives	C16H30N4O5	-
ME0136936	T3_positive	7-Amino-4-methylcoumarin	Lignans and Coumarins	Coumarins	C10H9NO2	C01386
ME0152386	T3_positive	Leu-Ile-Tyr	Amino acids and derivatives	Amino acids and derivatives	C21H33N3O5	-
ME0151618	T3_positive	Ile-Trp-Tyr	Amino acids and derivatives	Amino acids and derivatives	C26H32N4O5	-
ME0150200	T3_positive	Glu-Tyr-Tyr	Amino acids and derivatives	Amino acids and derivatives	C23H27N3O8	-
ME0155178	T3_positive	Phe-Glu-His-Asp	Amino acids and derivatives	Amino acids and derivatives	C24H30N6O9	-
ME0151691	T3_positive	Ile-Tyr	Amino acids and derivatives	Amino acids and derivatives	C15H22N2O4	-
ME0147994	T3_positive	Cys-Cys-Met	Amino acids and derivatives	Amino acids and derivatives	C11H21N3O4S3	-
ME0110195	T3_positive	Tyr-Gln-Lys	Amino acids and derivatives	Amino acids and derivatives	C20H31N5O6	-
ME0152340	T3_positive	Leu-Gly-Asp-Val-Ile	Amino acids and derivatives	Amino acids and derivatives	C23H41N5O8	-
ME0153689	T3_positive	Met-Trp-His	Amino acids and derivatives	Amino acids and derivatives	C22H28N6O4S1	-
ME0150966	T3_positive	His-Ile-Arg-Glu	Amino acids and derivatives	Amino acids and derivatives	C23H39N9O7	-
ME0131127	T3_positive	Irigenin, dibenzyl ether	Flavonoids	Isoflavones	C32H28O8	-
ME0151136	T3_positive	His-Tyr-Thr	Amino acids and derivatives	Amino acids and derivatives	C19H25N5O6	-
ME0149607	T3_positive	Gln-Ala-Ala-Asp-Val	Amino acids and derivatives	Amino acids and derivatives	C20H34N6O9	-
ME0150138	T3_positive	Glu-Ser-Gln-Arg-Gln	Amino acids and derivatives	Amino acids and derivatives	C24H42N10O11	-
ME0153660	T3_positive	Met-Ser-His	Amino acids and derivatives	Amino acids and derivatives	C14H23N5O5S1	-
ME0158401	T3_positive	Tyr-Asn-Trp	Amino acids and derivatives	Amino acids and derivatives	C24H27N5O6	-
ME0108146	T3_positive	Met-Asp-Arg	Amino acids and derivatives	Amino acids and derivatives	C15H28N6O6S1	-
ME0152331	T3_positive	Leu-Glu-Tyr-Asp	Amino acids and derivatives	Amino acids and derivatives	C24H34N4O10	-
ME0001652	T3_positive	1-Naphthaldehyde	Benzene and substituted derivatives	Benzene and substituted derivatives	C11H8O	C14090
ME0155981	T3_positive	Pro-Pro-Phe	Amino acids and derivatives	Amino acids and derivatives	C19H25N3O4	-
ME0145835	T3_positive	Asn-Lys-Phe-Asp	Amino acids and derivatives	Amino acids and derivatives	C23H34N6O8	-
ME0151005	T3_positive	His-Lys-Ala	Amino acids and derivatives	Amino acids and derivatives	C15H26N6O4	-
ME0158092	T3_positive	Trp-Ala-Tyr	Amino acids and derivatives	Amino acids and derivatives	C23H26N4O5	-
ME0153203	T3_positive	Lys-Val-Ile-Arg	Amino acids and derivatives	Amino acids and derivatives	C23H46N8O5	-
ME0156029	T3_positive	Pro-Tyr-His	Amino acids and derivatives	Amino acids and derivatives	C20H25N5O5	-
ME0106526	T3_positive	3-phenyl-2-(pyrrolidine-2-carbonylamino)propanoic Acid	Amino acids and derivatives	Amino acids and derivatives	C14H18N2O3	-
ME0150007	T3_positive	Glu-Gly-Asn-Ile-Asp	Amino acids and derivatives	Amino acids and derivatives	C21H34N6O11	-
ME0146152	T3_positive	Asp-Ile-Lys-Glu-Met	Amino acids and derivatives	Amino acids and derivatives	C26H46N6O10S	-
ME0150466	T3_positive	Gly-Pro-His	Amino acids and derivatives	Amino acids and derivatives	C13H19N5O4	-
ME0105854	T3_positive	Asp-Glu-Arg	Amino acids and derivatives	Amino acids and derivatives	C15H26N6O8	-
ME0158225	T3_positive	Trp-Pro-Asp	Amino acids and derivatives	Amino acids and derivatives	C20H24N4O6	-
ME0151049	T3_positive	His-Phe-Met	Amino acids and derivatives	Amino acids and derivatives	C20H27N5O4S1	-
ME0155415	T3_positive	Phe-Val-Ser-Glu-Ala	Amino acids and derivatives	Amino acids and derivatives	C25H37N5O9	-
ME0153571	T3_positive	Met-His-Ser	Amino acids and derivatives	Amino acids and derivatives	C14H23N5O5S1	-
ME0150829	T3_positive	His-Ala-Tyr-Tyr-Leu	Amino acids and derivatives	Amino acids and derivatives	C33H43N7O8	-
ME0115209	T3_positive	Quinamide isopropylidene	Alcohol and amines	Amines	C10H17NO5	-
ME0144516	T3_positive	Ala-Asp-Leu-Glu-Lys	Amino acids and derivatives	Amino acids and derivatives	C24H42N6O10	-
ME0148087	T3_positive	Cys-Val-Ala	Amino acids and derivatives	Amino acids and derivatives	C11H21N3O4S1	-
ME0145720	T3_positive	Asn-Gln-Gln	Amino acids and derivatives	Amino acids and derivatives	C14H24N6O7	-
ME0151056	T3_positive	His-Pro-Ala	Amino acids and derivatives	Amino acids and derivatives	C14H21N5O4	-
ME0155986	T3_positive	Pro-Pro-Val	Amino acids and derivatives	Amino acids and derivatives	C15H25N3O4	-
ME0063221	T3_positive	1-beta-D-Galactosylsphingosine	Lipids	Sphingolipids	C24H47NO7	-
ME0107750	T3_positive	Leu-Pro-Leu	Amino acids and derivatives	Amino acids and derivatives	C17H31N3O4	-
ME0159128	T3_positive	Val-Phe-Pro-Phe-Gln	Amino acids and derivatives	Amino acids and derivatives	C33H44N6O7	-
ME0155875	T3_positive	Pro-His-Asn	Amino acids and derivatives	Amino acids and derivatives	C15H22N6O5	-
ME0157625	T3_positive	Thr-Glu-Asp-Pro-Ala	Amino acids and derivatives	Amino acids and derivatives	C21H33N5O11	-
ME0104056	T3_positive	N-Carbamoylsarcosine	Amino acids and derivatives	Amino acids and derivatives	C4H8N2O3	C01043
ME0156916	T3_positive	Ser-Ser-Val-Gln-Glu	Amino acids and derivatives	Amino acids and derivatives	C21H36N6O11	-
ME0110081	T3_positive	Trp-Ser-Lys	Amino acids and derivatives	Amino acids and derivatives	C20H29N5O5	-
ME0158634	T3_positive	Tyr-Trp-Asp	Amino acids and derivatives	Amino acids and derivatives	C24H26N4O7	-
ME0157697	T3_positive	Thr-Leu-Ala	Amino acids and derivatives	Amino acids and derivatives	C13H25N3O5	-
ME0153188	T3_positive	Lys-Tyr-Tyr-Arg-Val	Amino acids and derivatives	Amino acids and derivatives	C35H53N9O8	-
ME0152407	T3_positive	Leu-Leu-Trp	Amino acids and derivatives	Amino acids and derivatives	C23H34N4O4	-
ME0155102	T3_positive	Phe-Asn-Asn	Amino acids and derivatives	Amino acids and derivatives	C17H23N5O6	-
ME0106266	T3_positive	Cys-Pro-Lys	Amino acids and derivatives	Amino acids and derivatives	C14H26N4O4S1	-
ME0146333	T3_positive	Asp-Arg	Amino acids and derivatives	Amino acids and derivatives	C10H19N5O5	-
ME0145529	T3_positive	Arg-Trp-His	Amino acids and derivatives	Amino acids and derivatives	C23H31N9O4	-
ME0138446	T3_positive	Irigenin trimethyl ether	Flavonoids	Isoflavones	C21H22O8	-
ME0151141	T3_positive	His-Val-Asn	Amino acids and derivatives	Amino acids and derivatives	C15H24N6O5	-
ME0107091	T3_positive	Gly-Ser-Lys	Amino acids and derivatives	Amino acids and derivatives	C11H22N4O5	-
ME0146303	T3_positive	Asp-Tyr-His	Amino acids and derivatives	Amino acids and derivatives	C19H23N5O7	-
ME0149830	T3_positive	Gln-Trp-His	Amino acids and derivatives	Amino acids and derivatives	C22H27N7O5	-
ME0054718	T3_positive	4-(1,3-Butadienyl)-3,5,5-trimethylcyclohex-2-en-1-one	Others	Aldehyde compounds	C13H18O	-
ME0144770	T3_positive	Ala-Tyr-Asn-Glu	Amino acids and derivatives	Amino acids and derivatives	C21H29N5O9	-
ME0155156	T3_positive	Phe-Gln-Asn	Amino acids and derivatives	Amino acids and derivatives	C18H25N5O6	-
ME0158250	T3_positive	Trp-Thr-Gln	Amino acids and derivatives	Amino acids and derivatives	C20H27N5O6	-
ME0168255	T3_positive	n6-(cis-hydroxyisopentenyl)adenosine	Nucleotides and derivatives	Nucleotides and derivatives	C15H21N5O5	-
ME0156014	T3_positive	Pro-Trp-Gln	Amino acids and derivatives	Amino acids and derivatives	C21H27N5O5	-
ME0153707	T3_positive	Met-Tyr-Thr	Amino acids and derivatives	Amino acids and derivatives	C18H27N3O6S1	-
ME0155171	T3_positive	Phe-Glu-Ala	Amino acids and derivatives	Amino acids and derivatives	C17H23N3O6	-
ME0145383	T3_positive	Arg-Ile-Arg-Val-Met	Amino acids and derivatives	Amino acids and derivatives	C28H55N11O6S	-
ME0151128	T3_positive	His-Tyr-Glu-Asp	Amino acids and derivatives	Amino acids and derivatives	C24H30N6O10	-
ME0155392	T3_positive	Phe-Tyr-Ser	Amino acids and derivatives	Amino acids and derivatives	C21H25N3O6	-
ME0109891	T3_positive	Thr-Pro-Arg	Amino acids and derivatives	Amino acids and derivatives	C15H28N6O5	-
ME0145253	T3_positive	Arg-Ala-Ser	Amino acids and derivatives	Amino acids and derivatives	C12H24N6O5	-
ME0158572	T3_positive	Tyr-Phe-Leu	Amino acids and derivatives	Amino acids and derivatives	C24H31N3O5	-
ME0158648	T3_positive	Tyr-Tyr-Gln	Amino acids and derivatives	Amino acids and derivatives	C23H28N4O7	-
ME0153629	T3_positive	Met-Phe-Glu	Amino acids and derivatives	Amino acids and derivatives	C19H27N3O6S1	-
ME0158189	T3_positive	Trp-Leu-Met	Amino acids and derivatives	Amino acids and derivatives	C22H32N4O4S1	-
ME0159206	T3_positive	Val-Trp-Val	Amino acids and derivatives	Amino acids and derivatives	C21H30N4O4	-
ME0105883	T3_positive	Asp-Val-Arg	Amino acids and derivatives	Amino acids and derivatives	C15H28N6O6	-
ME0138976	T3_positive	Mollicellin I	Benzene and substituted derivatives	Benzene and substituted derivatives	C21H22O6	-
ME0009022	T3_positive	N-Desmethyl Imatinib	Benzene and substituted derivatives	Benzene and substituted derivatives	C28H29N7O	-
ME0014461	T3_positive	Alkynyl 4-hydroxy-2-nonenal	Organic acids	Organic acids	C9H12O2	-
ME0155807	T3_positive	Pro-Asp-Asp	Amino acids and derivatives	Amino acids and derivatives	C13H19N3O8	-
ME0146127	T3_positive	Asp-His-Leu-Thr-Gln	Amino acids and derivatives	Amino acids and derivatives	C25H40N8O10	-
ME0157032	T3_positive	Ser-TyrMe-OH	Amino acids and derivatives	Amino acids and derivatives	C19H20N2O8	-
ME0152327	T3_positive	Leu-Glu-Pro-His-Ile	Amino acids and derivatives	Amino acids and derivatives	C28H45N7O8	-
ME0155791	T3_positive	Pro-Asn-Asn	Amino acids and derivatives	Amino acids and derivatives	C13H21N5O6	-
ME0157877	T3_positive	Thr-Abu-OH	Amino acids and derivatives	Amino acids and derivatives	C14H18N2O7	-
ME0149980	T3_positive	Glu-Gln-Phe	Amino acids and derivatives	Amino acids and derivatives	C19H26N4O7	-
ME0155155	T3_positive	Phe-Gln-Arg-Lys	Amino acids and derivatives	Amino acids and derivatives	C26H43N9O6	-
ME0151034	T3_positive	His-Met-Val	Amino acids and derivatives	Amino acids and derivatives	C16H27N5O4S1	-
ME0126110	T3_positive	1-Phenylpiperazine	Heterocyclic compounds	Heterocyclic compounds	C10H14N2	-
ME0158314	T3_positive	Trp-TyrMe-OH	Amino acids and derivatives	Amino acids and derivatives	C27H25N3O7	-
ME0145491	T3_positive	Arg-Ser-Ala-Glu	Amino acids and derivatives	Amino acids and derivatives	C17H31N7O8	-
ME0159075	T3_positive	Val-Leu-Ser-Asp	Amino acids and derivatives	Amino acids and derivatives	C18H32N4O8	-
ME0150850	T3_positive	His-Asn-Glu	Amino acids and derivatives	Amino acids and derivatives	C15H22N6O7	-
ME0158615	T3_positive	Tyr-Thr-Ala-Glu	Amino acids and derivatives	Amino acids and derivatives	C21H30N4O9	-
ME0152252	T3_positive	Leu-Asn-Trp	Amino acids and derivatives	Amino acids and derivatives	C21H29N5O5	-
ME0156682	T3_positive	Ser-Asp-Ile-Glu-Val	Amino acids and derivatives	Amino acids and derivatives	C23H39N5O11	-
ME0144590	T3_positive	Ala-His-Gly-Val-Asp	Amino acids and derivatives	Amino acids and derivatives	C20H31N7O8	-
ME0110231	T3_positive	Tyr-Val-Gln	Amino acids and derivatives	Amino acids and derivatives	C19H28N4O6	-
ME0157786	T3_positive	Thr-Pro-Pro-Val-Gln	Amino acids and derivatives	Amino acids and derivatives	C24H40N6O8	-
ME0144214	T3_positive	Abu-Trp-OH	Amino acids and derivatives	Amino acids and derivatives	C20H19N3O6	-
ME0150502	T3_positive	Gly-Thr-Val-Met-Arg	Amino acids and derivatives	Amino acids and derivatives	C22H42N8O7S	-
ME0015862	T3_positive	1-O-Hexadecyl-2-arachidonoyl-sn-glycero-3-phosphocholine	Benzene and substituted derivatives	Benzene and substituted derivatives	C44H82NO7P	-
ME0158406	T3_positive	Tyr-Asp-Ala-Asp	Amino acids and derivatives	Amino acids and derivatives	C20H26N4O10	-
ME0002200	T3_positive	2,4,6-trihydroxybenzaldehyde	Phenolic acids	Phenolic acids	C7H6O4	-
ME0156741	T3_positive	Ser-Glu-Phe-Arg	Amino acids and derivatives	Amino acids and derivatives	C23H35N7O8	-
ME0144662	T3_positive	Ala-Lys-Gly-Lys-Ser	Amino acids and derivatives	Amino acids and derivatives	C20H39N7O7	-
ME0153708	T3_positive	Met-Tyr-Tyr	Amino acids and derivatives	Amino acids and derivatives	C23H29N3O6S1	-
ME0150336	T3_positive	Gly-Cys-His	Amino acids and derivatives	Amino acids and derivatives	C11H17N5O4S1	-
ME0105792	T3_positive	Asn-Ser-Lys	Amino acids and derivatives	Amino acids and derivatives	C13H25N5O6	-
ME0109098	T3_positive	Phe-Asp-Cys	Amino acids and derivatives	Amino acids and derivatives	C16H21N3O6S1	-
ME0151524	T3_positive	Ile-Met-Gly	Amino acids and derivatives	Amino acids and derivatives	C13H25N3O4S1	-
ME0144774	T3_positive	Ala-Tyr-Glu-Asp	Amino acids and derivatives	Amino acids and derivatives	C21H28N4O10	-
ME0159042	T3_positive	Val-Ile-Leu-Asp	Amino acids and derivatives	Amino acids and derivatives	C21H38N4O7	-
ME0153040	T3_positive	Lys-Leu-His-Val-Asp	Amino acids and derivatives	Amino acids and derivatives	C27H46N8O8	-
ME0156989	T3_positive	Ser-Val-Val	Amino acids and derivatives	Amino acids and derivatives	C13H25N3O5	-
ME0158300	T3_positive	Trp-HoPhe-OH	Amino acids and derivatives	Amino acids and derivatives	C27H25N3O6	-
ME0156814	T3_positive	Ser-Leu-Asp-Cys-Asn	Amino acids and derivatives	Amino acids and derivatives	C20H34N6O10S	-
ME0155984	T3_positive	Pro-Pro-Thr	Amino acids and derivatives	Amino acids and derivatives	C14H23N3O5	-
ME0153645	T3_positive	Met-Pro-Glu	Amino acids and derivatives	Amino acids and derivatives	C15H25N3O6S1	-
ME0150428	T3_positive	Gly-Lys-Thr-Ser-Glu	Amino acids and derivatives	Amino acids and derivatives	C20H36N6O10	-
ME0149797	T3_positive	Gln-Ser-Ala	Amino acids and derivatives	Amino acids and derivatives	C11H20N4O6	-
ME0156678	T3_positive	Ser-Asp-Glu	Amino acids and derivatives	Amino acids and derivatives	C12H19N3O9	-
ME0157610	T3_positive	Thr-Gln-His	Amino acids and derivatives	Amino acids and derivatives	C15H24N6O6	-
ME0157733	T3_positive	Thr-Lys-Phe-Ser-Val	Amino acids and derivatives	Amino acids and derivatives	C27H44N6O8	-
ME0155806	T3_positive	Pro-Asp-Asn	Amino acids and derivatives	Amino acids and derivatives	C13H20N4O7	-
ME0110336	T3_positive	Val-Asp-Arg	Amino acids and derivatives	Amino acids and derivatives	C15H28N6O6	-
ME0146216	T3_positive	Asp-Phe-Gln	Amino acids and derivatives	Amino acids and derivatives	C18H24N4O7	-
ME0144772	T3_positive	Ala-Tyr-Gln	Amino acids and derivatives	Amino acids and derivatives	C17H24N4O6	-
ME0109233	T3_positive	Phe-Trp	Amino acids and derivatives	Amino acids and derivatives	C20H21N3O3	-
ME0155303	T3_positive	Phe-Phe-Leu	Amino acids and derivatives	Amino acids and derivatives	C24H31N3O4	-
ME0145421	T3_positive	Arg-Leu-Lys-Trp	Amino acids and derivatives	Amino acids and derivatives	C29H47N9O5	-
ME0157661	T3_positive	Thr-His-Gly	Amino acids and derivatives	Amino acids and derivatives	C12H19N5O5	-
ME0155979	T3_positive	Pro-Pro-Leu	Amino acids and derivatives	Amino acids and derivatives	C16H27N3O4	-
ME0150001	T3_positive	Glu-Glu-Thr-Val-Tyr	Amino acids and derivatives	Amino acids and derivatives	C28H41N5O12	-
ME0155209	T3_positive	Phe-His-His	Amino acids and derivatives	Amino acids and derivatives	C21H25N7O4	-
ME0150176	T3_positive	Glu-Trp-Leu	Amino acids and derivatives	Amino acids and derivatives	C22H30N4O6	-
ME0149678	T3_positive	Gln-Glu-Gln	Amino acids and derivatives	Amino acids and derivatives	C15H25N5O8	-
ME0155851	T3_positive	Pro-Glu-Glu-Leu-Lys	Amino acids and derivatives	Amino acids and derivatives	C27H46N6O10	-
ME0110351	T3_positive	Val-Ile-Lys	Amino acids and derivatives	Amino acids and derivatives	C17H34N4O4	-
ME0155379	T3_positive	Phe-Tyr-Gln	Amino acids and derivatives	Amino acids and derivatives	C23H28N4O6	-
ME0000264	T3_positive	CID 10044441	Alkaloids	Alkaloids	C23H30N2O2	C20438
ME0006315	T3_positive	Benzyl nicotinate	Benzene and substituted derivatives	Benzene and substituted derivatives	C13H11NO2	C12865
ME0150191	T3_positive	Glu-Tyr-His	Amino acids and derivatives	Amino acids and derivatives	C20H25N5O7	-
ME0152274	T3_positive	Leu-Cys-Asn	Amino acids and derivatives	Amino acids and derivatives	C13H24N4O5S1	-
ME0146177	T3_positive	Asp-Leu-Ser	Amino acids and derivatives	Amino acids and derivatives	C13H23N3O7	-
ME0153637	T3_positive	Met-Phe-Thr-Glu-Asp	Amino acids and derivatives	Amino acids and derivatives	C27H39N5O11S	-
ME0106921	T3_positive	Glu-Pro-Arg	Amino acids and derivatives	Amino acids and derivatives	C16H28N6O6	-
ME0146194	T3_positive	Asp-Lys-Ser-Cys-Ala	Amino acids and derivatives	Amino acids and derivatives	C19H34N6O9S	-
ME0158347	T3_positive	Tyr-Ala-Arg-Asp-Glu	Amino acids and derivatives	Amino acids and derivatives	C27H40N8O11	-
ME0159249	T3_positive	Val-Abu-OH	Amino acids and derivatives	Amino acids and derivatives	C14H18N2O6	-
ME0156750	T3_positive	Ser-Gly-Ala-Asn-Phe	Amino acids and derivatives	Amino acids and derivatives	C21H30N6O8	-
ME0151636	T3_positive	Ile-Tyr-Val	Amino acids and derivatives	Amino acids and derivatives	C20H31N3O5	-
ME0137930	T3_positive	Deoxysappanone B 7,3'-dimethyl ether acetate	Others	Ketone compounds	C20H20O6	-
ME0158730	T3_positive	Tyr-TyrMe-OH	Amino acids and derivatives	Amino acids and derivatives	C25H24N2O8	-
ME0155956	T3_positive	Pro-Phe-Gln	Amino acids and derivatives	Amino acids and derivatives	C19H26N4O5	-
ME0147988	T3_positive	Cys-Asn-Ser-Ala-Arg	Amino acids and derivatives	Amino acids and derivatives	C19H35N9O8S	-
ME0144577	T3_positive	Ala-Gly-Asp-Glu-Ser	Amino acids and derivatives	Amino acids and derivatives	C17H27N5O11	-
ME0145303	T3_positive	Arg-Asp-Thr-Asp	Amino acids and derivatives	Amino acids and derivatives	C18H31N7O10	-
ME0158578	T3_positive	Tyr-Phe-Thr-Lys	Amino acids and derivatives	Amino acids and derivatives	C28H39N5O7	-
ME0153037	T3_positive	Lys-Leu-Gly-Gln-Ser	Amino acids and derivatives	Amino acids and derivatives	C22H41N7O8	-
ME0110179	T3_positive	Tumonoic acid H	Organic acids	Organic acids	C26H45NO7	-
ME0151137	T3_positive	His-Tyr-Tyr	Amino acids and derivatives	Amino acids and derivatives	C24H27N5O6	-
ME0158484	T3_positive	Tyr-His-Leu	Amino acids and derivatives	Amino acids and derivatives	C21H29N5O5	-
ME0157017	T3_positive	Ser-Nap-OH	Amino acids and derivatives	Amino acids and derivatives	C22H20N2O7	-
ME0156800	T3_positive	Ser-Ile-Lys-Gly-Lys	Amino acids and derivatives	Amino acids and derivatives	C23H45N7O7	-
ME0154270	T3_positive	Nap-Asn-OH	Amino acids and derivatives	Amino acids and derivatives	C22H19N3O7	-
ME0154297	T3_positive	Nap-Tyr-OH	Amino acids and derivatives	Amino acids and derivatives	C27H22N2O7	-
ME0123681	T3_positive	Dihydrorhodamine 123	Heterocyclic compounds	Heterocyclic compounds	C21H18N2O3	-
ME0151505	T3_positive	Ile-Lys-Arg-Asp-Phe	Amino acids and derivatives	Amino acids and derivatives	C31H51N9O8	-
ME0158098	T3_positive	Trp-Arg-Met	Amino acids and derivatives	Amino acids and derivatives	C22H33N7O4S1	-
ME0149865	T3_positive	Gln-Val-Lys-Glu-Leu	Amino acids and derivatives	Amino acids and derivatives	C27H49N7O9	-
ME0156851	T3_positive	Ser-Lys-Thr-Glu	Amino acids and derivatives	Amino acids and derivatives	C18H33N5O9	-
ME0168295	T3_positive	Prolyltryptophan	Amino acids and derivatives	Amino acids and derivatives	C16H19N3O3	-
ME0156013	T3_positive	Pro-Trp-Asp	Amino acids and derivatives	Amino acids and derivatives	C20H24N4O6	-
ME0152235	T3_positive	Leu-Arg-Thr-Gln-Val	Amino acids and derivatives	Amino acids and derivatives	C26H49N9O8	-
ME0049181	T3_positive	4-(2,6,6-Trimethylcyclohexa-1,3-dienyl)but-3-en-2-one	Others	Ketone compounds	C13H18O	-
ME0156742	T3_positive	Ser-Glu-Ser	Amino acids and derivatives	Amino acids and derivatives	C11H19N3O8	-
ME0150440	T3_positive	Gly-Met-Tyr	Amino acids and derivatives	Amino acids and derivatives	C16H23N3O5S1	-
ME0144682	T3_positive	Ala-Met-Val	Amino acids and derivatives	Amino acids and derivatives	C13H25N3O4S1	-
ME0158447	T3_positive	Tyr-Gln-Val-Arg	Amino acids and derivatives	Amino acids and derivatives	C25H40N8O7	-
ME0152469	T3_positive	Leu-Pro-His	Amino acids and derivatives	Amino acids and derivatives	C17H27N5O4	-
ME0159185	T3_positive	Val-Thr-Phe-Glu-Ser	Amino acids and derivatives	Amino acids and derivatives	C26H39N5O10	-
ME0158129	T3_positive	Trp-Gln-Gln-Asp-Glu	Amino acids and derivatives	Amino acids and derivatives	C30H40N8O12	-
ME0147991	T3_positive	Cys-Asp-His	Amino acids and derivatives	Amino acids and derivatives	C13H19N5O6S1	-
ME0105873	T3_positive	Asp-Pro-Arg	Amino acids and derivatives	Amino acids and derivatives	C15H26N6O6	-
ME0145339	T3_positive	Arg-Glu-Ala-Phe-Arg	Amino acids and derivatives	Amino acids and derivatives	C29H47N11O8	-
ME0155133	T3_positive	Phe-Asp-Phe	Amino acids and derivatives	Amino acids and derivatives	C22H25N3O6	-
ME0107100	T3_positive	Gly-Val-Gln	Amino acids and derivatives	Amino acids and derivatives	C12H22N4O5	-
ME0107359	T3_positive	His-Trp	Amino acids and derivatives	Amino acids and derivatives	C17H19N5O3	-
ME0144486	T3_positive	Ala-Asn-Arg-Val-Thr	Amino acids and derivatives	Amino acids and derivatives	C22H41N9O8	-
ME0123204	T3_positive	Cannabinol	Phenolic acids	Phenolic acids	C21H26O2	C07580
ME0016968	T3_positive	Cedrol	Alcohol and amines	Alcohols	C15H26O	C09631
ME0156778	T3_positive	Ser-His-Met	Amino acids and derivatives	Amino acids and derivatives	C14H23N5O5S1	-
ME0109104	T3_positive	Phe-Gln-Lys	Amino acids and derivatives	Amino acids and derivatives	C20H31N5O5	-
ME0158358	T3_positive	Tyr-Ala-Leu-Asp	Amino acids and derivatives	Amino acids and derivatives	C22H32N4O8	-
ME0150147	T3_positive	Glu-Ser-Ser	Amino acids and derivatives	Amino acids and derivatives	C11H19N3O8	-
ME0148019	T3_positive	Cys-Ile-Asp	Amino acids and derivatives	Amino acids and derivatives	C13H23N3O6S1	-
ME0155096	T3_positive	Phe-Arg-Met	Amino acids and derivatives	Amino acids and derivatives	C20H32N6O4S1	-
ME0151503	T3_positive	Ile-Lys-Ala-Arg	Amino acids and derivatives	Amino acids and derivatives	C21H42N8O5	-
ME0144506	T3_positive	Ala-Asn-Val-Asp	Amino acids and derivatives	Amino acids and derivatives	C16H27N5O8	-
ME0155386	T3_positive	Phe-Tyr-Leu-Glu	Amino acids and derivatives	Amino acids and derivatives	C29H38N4O8	-
ME0150911	T3_positive	His-Glu-Ala	Amino acids and derivatives	Amino acids and derivatives	C14H21N5O6	-
ME0157596	T3_positive	Thr-Asp-Val	Amino acids and derivatives	Amino acids and derivatives	C13H23N3O7	-
ME0109125	T3_positive	Phe-Phe-Asp	Amino acids and derivatives	Amino acids and derivatives	C22H25N3O6	-
ME0146182	T3_positive	Asp-Lys-Arg-Glu-Lys	Amino acids and derivatives	Amino acids and derivatives	C27H50N10O10	-
ME0007428	T3_positive	Isopropyl 4-hydroxybenzoate	Benzene and substituted derivatives	Benzene and substituted derivatives	C10H12O3	C20343
ME0153153	T3_positive	Lys-Thr-Ile-Thr-Leu	Amino acids and derivatives	Amino acids and derivatives	C26H50N6O8	-
ME0150423	T3_positive	Gly-Lys-Lys-Gln-Leu	Amino acids and derivatives	Amino acids and derivatives	C25H48N8O7	-
ME0148067	T3_positive	Cys-Ser-Phe	Amino acids and derivatives	Amino acids and derivatives	C15H21N3O5S1	-
ME0150516	T3_positive	Gly-Tyr-His	Amino acids and derivatives	Amino acids and derivatives	C17H21N5O5	-
ME0157547	T3_positive	Thr-Arg-Glu-Glu-Lys	Amino acids and derivatives	Amino acids and derivatives	C26H47N9O11	-
ME0153677	T3_positive	Met-Thr-His	Amino acids and derivatives	Amino acids and derivatives	C15H25N5O5S1	-
ME0153126	T3_positive	Lys-Ser-Asp-Glu-Thr	Amino acids and derivatives	Amino acids and derivatives	C22H38N6O12	-
ME0015479	T3_positive	12(13)Ep-9-KODE	Lipids	Free fatty acids	C18H30O4	-
ME0168284	T3_positive	6,9,12,15-Octadecatetraenoic acid methyl ester	Fatty acyl	Others	C19H30O2	-
ME0158564	T3_positive	Tyr-Phe-Asp-Arg	Amino acids and derivatives	Amino acids and derivatives	C28H37N7O8	-
ME0110374	T3_positive	Val-Tyr-Arg	Amino acids and derivatives	Amino acids and derivatives	C20H32N6O5	-
ME0159134	T3_positive	Val-Pro-Asn	Amino acids and derivatives	Amino acids and derivatives	C14H24N4O5	-
ME0156803	T3_positive	Ser-Ile-Phe-Glu	Amino acids and derivatives	Amino acids and derivatives	C23H34N4O8	-
ME0156965	T3_positive	Ser-Tyr-Tyr-Gln-Ser	Amino acids and derivatives	Amino acids and derivatives	C29H38N6O11	-
ME0109884	T3_positive	Thr-Lys-Pro-Arg	Amino acids and derivatives	Amino acids and derivatives	C21H40N8O6	-
ME0110116	T3_positive	Trp-His	Amino acids and derivatives	Amino acids and derivatives	C17H19N5O3	-
ME0149850	T3_positive	Gln-Val-Ala	Amino acids and derivatives	Amino acids and derivatives	C13H24N4O5	-
ME0144470	T3_positive	Ala-Arg-Gln-Ala-Leu	Amino acids and derivatives	Amino acids and derivatives	C23H43N9O7	-
ME0148065	T3_positive	Cys-Ser-His	Amino acids and derivatives	Amino acids and derivatives	C12H19N5O5S1	-
ME0156636	T3_positive	Ser-Ala-Val-Thr-Ala	Amino acids and derivatives	Amino acids and derivatives	C18H33N5O8	-
ME0156774	T3_positive	Ser-His-Glu-Ala-Glu	Amino acids and derivatives	Amino acids and derivatives	C22H33N7O11	-
ME0153085	T3_positive	Lys-Met-Val-Ser-Arg	Amino acids and derivatives	Amino acids and derivatives	C25H49N9O7S	-
ME0151560	T3_positive	Ile-Pro-Met	Amino acids and derivatives	Amino acids and derivatives	C16H29N3O4S1	-
ME0151142	T3_positive	His-Val-Asp	Amino acids and derivatives	Amino acids and derivatives	C15H23N5O6	-
ME0169519	T3_positive	N-Acetyl-S-farnesyl-L-cysteine	Amino acids and derivatives	Amino acids and derivatives	C20H33NO3S	-
ME0145533	T3_positive	Arg-Trp-Tyr	Amino acids and derivatives	Amino acids and derivatives	C26H33N7O5	-
ME0158417	T3_positive	Tyr-Asp-Ser	Amino acids and derivatives	Amino acids and derivatives	C16H21N3O8	-
ME0158708	T3_positive	TyrMe-Nap-OH	Amino acids and derivatives	Amino acids and derivatives	C29H26N2O7	-
ME0155762	T3_positive	Pro-Ala-Gln	Amino acids and derivatives	Amino acids and derivatives	C13H22N4O5	-
ME0150883	T3_positive	His-Cys-Asp	Amino acids and derivatives	Amino acids and derivatives	C13H19N5O6S1	-
ME0155997	T3_positive	Pro-Ser-Val	Amino acids and derivatives	Amino acids and derivatives	C13H23N3O5	-
ME0156028	T3_positive	Pro-Tyr-Gly	Amino acids and derivatives	Amino acids and derivatives	C16H21N3O5	-
ME0151093	T3_positive	His-Thr-Gln-Glu	Amino acids and derivatives	Amino acids and derivatives	C20H31N7O9	-
ME0156736	T3_positive	Ser-Glu-Leu-Ser-Met	Amino acids and derivatives	Amino acids and derivatives	C22H39N5O10S	-
ME0158389	T3_positive	Tyr-Asn-Asp	Amino acids and derivatives	Amino acids and derivatives	C17H22N4O8	-
ME0156860	T3_positive	Ser-Met-Leu	Amino acids and derivatives	Amino acids and derivatives	C14H27N3O5S1	-
ME0157869	T3_positive	Thr-Val-Phe	Amino acids and derivatives	Amino acids and derivatives	C18H27N3O5	-
ME0106558	T3_positive	(2R)-piperidin-1-ium-2-carboxylate	Organic acids	Organic acids	C6H11NO2	-
ME0054888	T3_positive	Methyl geranate	Terpenoids	Terpene	C11H18O2	-
ME0145432	T3_positive	Arg-Lys-Asn	Amino acids and derivatives	Amino acids and derivatives	C16H32N8O5	-
ME0158424	T3_positive	Tyr-Cys-Leu	Amino acids and derivatives	Amino acids and derivatives	C18H27N3O5S1	-
ME0150219	T3_positive	Glu-Val-Thr	Amino acids and derivatives	Amino acids and derivatives	C14H25N3O7	-
ME0150005	T3_positive	Glu-Glu-Val-Leu-Ile	Amino acids and derivatives	Amino acids and derivatives	C27H47N5O10	-
ME0153691	T3_positive	Met-Trp-Met	Amino acids and derivatives	Amino acids and derivatives	C21H30N4O4S2	-
ME0052570	T3_positive	(3alpha,5beta,17alpha)-17-Methylandrost-1-ene-3,17-diol	Alcohol and amines	Alcohols	C20H32O2	-
ME0153882	T3_positive	Met-Tyr	Amino acids and derivatives	Amino acids and derivatives	C14H20N2O4S	-
ME0158518	T3_positive	Tyr-Leu-Gly	Amino acids and derivatives	Amino acids and derivatives	C17H25N3O5	-
ME0149847	T3_positive	Gln-Tyr-Trp	Amino acids and derivatives	Amino acids and derivatives	C25H29N5O6	-
ME0150291	T3_positive	Gly-Ala-His	Amino acids and derivatives	Amino acids and derivatives	C11H17N5O4	-
ME0131715	T3_positive	3,4,5-Trihydroxy-6-[[3,4,5-trihydroxy-6-[[2-(2-hydroxypropan-2-yl)-7-oxo-2,3-dihydrouro[3,2-g]chromen-9-yl]oxy]oxan-2-yl]methoxy]oxane-2-carboxylic acid	Organic acids	Organic acids	C26H32O16	-
ME0012813	T3_positive	[(2R)-3-hexadecanoyloxy-2-[(6E,9E)-octadeca-6,9-dienoyl]oxypropyl] 2-(trimethylazaniumyl)ethyl phosphate	Glycerophospholipids	PC	C42H80NO8P	-
ME0010996	T3_positive	Geranyl 6-O-alpha-L-arabinofuranosyl-beta-D-glucopyranoside	Terpenoids	Terpene	C21H36O10	-
ME0049494	T3_positive	1-Myristoyl-3-a-linolenoyl-sn-glycerol	Glycerolipids	DG	C35H62O5	-
ME0015955	T3_positive	Asparagoside D	Amino acids and derivatives	Amino acids and derivatives	C45H74O18	-
ME0146062	T3_positive	Asp-Asp-Trp	Amino acids and derivatives	Amino acids and derivatives	C19H22N4O8	-
ME0061360	T3_positive	Pgp(16:0/18:3(6Z,9Z,12Z))	Glycerophospholipids	PG-P	C40H74O13P2	-
ME0136081	T3_positive	6-{[7-({6-[(acetyloxy)methyl]-3-{[3,4-dihydroxy-4-(hydroxymethyl)oxolan-2-yl]oxy}-4,5-dihydroxyoxan-2-yl}oxy)-2-(4-hydroxyphenyl)-4-oxo-4H-chromen-5-yl]oxy}-3,4,5-trihydroxyoxane-2-carboxylic acid	Organic acids	Organic acids	C34H38O21	-
ME0165745	T3_positive	2-(3,4-dihydroxyphenyl)-3-[(2S,3R,4S,5S,6R)-4,5-dihydroxy-6-[[(2R,3R,4S,5S,6R)-3,4,5-trihydroxy-6-(hydroxymethyl)oxan-2-yl]oxymethyl]-3-[(2S,3R,4S,5R)-3,4,5-trihydroxyoxan-2-yl]oxyoxan-2-yl]oxy-5-hydroxychromen-7-one	Others	Ketone compounds	C32H38O20	-
ME0162490	T3_positive	Bis(2,3-dihydroxypropyl) phosphate	Organic acids	Organic acids	C6H14O8P-	-
ME0165475	T3_positive	quercetin 3-O-gentiobioside-7-O-rhamnoside	Others	Ketone compounds	C33H40O21	-
ME0165172	T3_positive	validoxylamine A 7'-phosphate(1-)	Others	Lactones	C14H25NO11P-	-
ME0103988	T3_positive	(R)-4'-phosphonatopantothenate(3-)	Organic acids	Organic acids	C9H15NO8P-3	-
ME0139851	T3_positive	trans-Caffeic acid [apiosyl-(1->6)-glucosyl] ester	Organic acids	Organic acids	C20H26O13	-
ME0104857	T3_positive	NCGC00347837-02_C42H58N8O7_1,4,7,10,13,16,19-Heptaazacyclotricosane-2,5,8,11,14,17,20-heptone, 3-(1H-indol-3-ylmethyl)-6,18-dimethyl-15-(1-methylethyl)-9-(2-methylpropyl)-12-(1-phenylethyl)-	Others	Lactones	C42H58N8O7	-
ME0056323	T3_positive	PA(22:5(4Z,7Z,10Z,13Z,16Z)/22:6(4Z,7Z,10Z,13Z,16Z,19Z))	Glycerophospholipids	PA	C47H71O8P	-
MEDP1857	T3_positive	N-(2-hydroxyethyl)icosanamide	Organic acids	Organic acids	C22H45NO2	-
MEDP1241	T3_positive	5-Hydroxy-2-oxo-4-ureido-2,5-dihydro-1H-imidazole-5-carboxylic acid ester	Organic acids	Organic acids	C5H6N4O5	-
ME0012960	T3_positive	1-Palmitoyl-2-docosahexaenoyl-sn-glycero-3-phosphocholine	Glycerophospholipids	PC	C46H80NO8P	-
ZINC85921663	T3_positive	Thelephantin J	Benzene and substituted derivatives	Benzene and substituted derivatives	C32H22O8	-
ZINC95919335	T3_positive	3',5-Dihydroxy-4',5',6-trimethoxy-7-[6-O-(3-methoxy-4-hydroxybenzoyl)-beta-D-glucopyranosyloxy]isoflavone	Benzene and substituted derivatives	Benzene and substituted derivatives	C32H32O16	-
MEDP1662	T3_positive	NE,NE,NE-TRIMETHYLLYSINE	Amino acids and derivatives	Amino acids and derivatives	C9H20N2O2	C03793
MEDP1024	T3_positive	Leu-Val	Amino acids and derivatives	Amino acids and derivatives	C11H22N2O3	-
ME0114307	T3_positive	D-Mannosamine	Others	Saccharides	C6H13NO5	C03570
ME0013736	T3_positive	3-(β-D-Galactopyranosyloxy)-2-hydroxypropyl (9Z,12Z)-octadeca-9,12-dienoate	Glycerolipids	TG	C27H48O9	-
MEDP1212	T3_positive	1,3-Dicyclohexylurea	Alcohol and amines	Polyamines	C13H24N2O	-
ME0134841	T3_positive	6-(2-{2,6-dihydroxy-4-[6-hydroxy-7-(3-methylbut-2-en-1-yl)-1-benzofuran-2-yl]phenyl}-6-(2,4-dihydroxyphenyl)-4-methylcyclohex-3-ene-1-carbonyloxy)-3,4,5-trihydroxyoxane-2-carboxylic acid	Organic acids	Organic acids	C39H40O14	-
ME0061550	T3_positive	PGP(a-13:0/i-18:0)	Glycerophospholipids	PG-P	C37H74O13P2	-
MEDL01878	T3_positive	Methyl dioxindole-3-acetate	Alkaloids	Plumerane	C11H11NO4	-
MEDP1063	T3_positive	Indole-5-carboxylic acid	Alkaloids	Plumerane	C9H7NO2	-
ME0129290	T3_positive	{4-[2,3-Dioxo-3-(2,4,6-trihydroxy-3-methoxyphenyl)propyl]-2-hydroxy-6-methoxyphenyl}oxidanesulfonic acid	Organic acids	Organic acids	C17H16O12S	-
MEDP1166	T3_positive	1-Palmitoyl-2-acetyl-sn-glycero-3-phosphocholine	Glycerophospholipids	PC	C26H52NO8P	-
ME0010733	T3_positive	VERBENONE	Terpenoids	Monoterpenoids	C10H14O	C09913
MEDP1022	T3_positive	2-[(2-Amino-3-hydroxybutanoyl)amino]-3-phenylpropanoic acid	Amino acids and derivatives	Amino acids and derivatives	C13H18N2O4	-
MEDP1990	T3_positive	Polydextrose	Others	Saccharides	C12H22O11	-
ME0011028	T3_positive	(2E,4E)-5-[8-hydroxy-1,5-dimethyl-3-[3,4,5-trihydroxy-6-(hydroxymethyl)oxan-2-yl]oxy-6-oxabicyclo[3.2.1]octan-8-yl]-3-methylpenta-2,4-dienoic acid	Organic acids	Organic acids	C21H32O10	-
ME0145271	T3_positive	Arg-Asn-Gln-Glu	Amino acids and derivatives	Amino acids and derivatives	C20H35N9O9	-
ME0145756	T3_positive	Asn-Gly-Phe	Amino acids and derivatives	Amino acids and derivatives	C15H20N4O5	-
MEDP1343	T3_positive	LPC(0:0/18:3)	Lipids	LPC	C26H49NO7P	-
MEDP1073	T3_positive	2-Amino-6-methoxypurine	Nucleotides and derivatives	Nucleotides and derivatives	C6H7N5O	-
ME0127867	T3_positive	(2-{9-hydroxy-2-oxo-2H,8H,9H-furo[2,3-h]chromen-8-yl}-2-[(3-methylbut-2-enoyl)oxy]propoxy)sulfonic acid	Organic acids	Organic acids	C19H20O10S	-
ME0165571	T3_positive	betanidin 5-O-sophorobiuronic acid	Alkaloids	Alkaloids	C30H32N2O19-2	-
MEDTP01862	T3_positive	MG(18:4/0:0/0:0)	Glycerolipids	MG	C21H34O4	-
ME0059282	T3_positive	PE-NMe(14:1(9Z)/20:5(5Z,8Z,11Z,14Z,17Z))	Glycerophospholipids	PE	C40H68NO8P	-
ZINC70454501	T3_positive	8-Hydroxy-5-[6-hydroxy-4-oxo-2-(2-phenylethyl)chromen-5-yl]-2-(2-phenylethyl)chromen-4-one	Others	Ketone compounds	C34H26O6	-
ME0062361	T3_positive	PS(15:0/18:4(6Z,9Z,12Z,15Z))	Glycerophospholipids	PS	C39H68NO10P	-
ME0061548	T3_positive	PGP(a-13:0/i-16:0)	Glycerophospholipids	PG-P	C35H70O13P2	-
ME0154256	T3_positive	Nafenopin glucuronide	Benzene and substituted derivatives	Benzene and substituted derivatives	C26H30O9	-
MEDP0798	T3_positive	1-Naphthylamine	Alkaloids	Alkaloids	C10H9N	C14790
ME0106202	T3_positive	Cyclo(D-alanyl-D-tryptophyl-4-aminobutanoyl-D-alanyl-D-valyl-L-phenylalanyl-D-valyl)	Amino acids and derivatives	Amino acids and derivatives	C40H54N8O7	-
MEDP0655	T3_positive	p-Anisidine	Alcohol and amines	Amines	C7H9NO	C19326
ME0106024	T3_positive	(2S)-2-[[(2R,3R)-3-azaniumyl-2-hydroxy-4-phenylbutanoyl]amino]-4-methylpentanoate	Amino acids and derivatives	Amino acids and derivatives	C16H24N2O4	-
ZINC33831290	T3_positive	2,4-dihydroxy-5-[(E)-2-(3,5,8-trihydroxynaphthalen-2-yl)ethenoxy]carbonylbenzoic acid	Benzene and substituted derivatives	Benzene and substituted derivatives	C20H14O9	-
MEDP1318	T3_positive	LPC(0:0/22:4)	Lipids	LPC	C30H55NO7P	-
ME0052399	T3_positive	NCGC00385411-01_C24H28O10_Spiro[furan-3(2H),1'(4'H)-naphthalene]-4'a,5'(5'H)-dicarboxylic acid, 6'-(acetyloxy)-5-(3-furanyl)-4,5,6',7',8',8'a-hexahydro-5'-hydroxy-2'-methyl-2-oxo-, dimethyl ester	Organic acids	Organic acids	C24H28O10	-
ME0128910	T3_positive	{[(2Z)-2-{2-[2-(2,4-dihydroxyphenyl)-7-hydroxy-4-oxo-4H-chromen-3-yl]ethylidene}-6-methylhept-5-en-1-yl]oxy}sulfonic acid	Organic acids	Organic acids	C25H26O9S	-
ME0143067	T3_positive	3-Nitroacrylic acid	Others	Lactones	C3H3NO4	C02231
MEDP0535	T3_positive	TRIETHYL PHOSPHATE	Organic acids	Organic acids	C6H15O4P	-
ME0061112	T3_positive	PG(16:1(9Z)/18:3(6Z,9Z,12Z))	Glycerophospholipids	PG	C40H71O10P	-
MEDP1444	T3_positive	FFA(18:5)	Lipids	Free fatty acids	C18H26O2	-
MEDL01842	T3_positive	2-hydroxy-3,4-dihydro-2H-1,4-benzoxazin-3-one	Alkaloids	Alkaloids	C8H7NO3	C15769
ME0154958	T3_positive	(2R,3R,4S,5S,6R)-2-[[(1R,2S,6S,9S,10S,11S,14S,15S,17S,18S,20S,23R,24S)-10,17-dihydroxy-6,10,23-trimethyl-4-azahexacyclo[12.11.0.02,11.04,9.015,24.018,23]pentacosan-20-yl]oxy]-6-(hydroxymethyl)oxane-3,4,5-triol	Alkaloids	Alkaloids	C33H55NO8	C17882
MEDL02274	T3_positive	Luteolin 7-glucuronide	Flavonoids	Flavones	C21H18O12	C03515
MEDN1384	T3_positive	D-Quinovose	Others	Saccharides	C6H12O5	C02522
ME0137198	T3_positive	8-hydroxy-2-phenyl-1lambdachromen-1-ylium	Flavonoids	Flavones	C15H11O2	-
MEDP1649	T3_positive	3-O-Methyl-a-methyldopa	Amino acids and derivatives	Amino acids and derivatives	C10H13NO4	-
MEDP0825	T3_positive	N-Cyclohexylformamide	Alkaloids	Alkaloids	C7H13NO	C11519
MEDP1678	T3_positive	Thr-Val-Leu	Amino acids and derivatives	Amino acids and derivatives	C15H29N3O5	-
ME0155095	T3_positive	Phe-Arg-Leu-Phe-Leu	Amino acids and derivatives	Amino acids and derivatives	C36H54N8O6	-
ME0115350	T3_positive	Tetraethylene glycol	Alcohol and amines	Alcohols	C8H18O5	-
ME0049501	T3_positive	1-Myristoyl-3-homo-g-linolenoyl-sn-glycerol	Glycerolipids	DG	C37H66O5	-
ME0063391	T3_positive	S-(2-Methylpropionyl)-dihydrolipoamide-E	Fatty acyl	Others	C12H23NO2S2	C04424
ME0144349	T3_positive	Ac-Val-Asp-Val-Ala-Asp-CHO	Amino acids and derivatives	Amino acids and derivatives	C23H37N5O10	-
ME0129515	T3_positive	1-(2H-1,3-benzodioxol-5-yl)-3-(6-hydroxy-4-methoxy-1-benzofuran-5-yl)propane-1,3-dione	Benzene and substituted derivatives	Benzene and substituted derivatives	C19H14O7	-
ME0158776	T3_positive	UDP-N-acetyl-alpha-D-glucosamine 3-phosphate	Nucleotides and derivatives	Nucleotides and derivatives	C17H28N3O20P3	C20245
ZINC103559750	T3_positive	Junceellolide I	Others	Lactones	C24H36O9	-
ME0158353	T3_positive	Tyr-Ala-Glu-Leu-Arg	Amino acids and derivatives	Amino acids and derivatives	C29H46N8O9	-
ME0164299	T3_positive	Bis[1-[(1E,3E,5Z)-1,3,5-heptatrienyl]-8-(2,3-dihydroxyphenyl)octyl] peroxide	Phenolic acids	Phenolic acids	C42H58O6	-
ME0011668	T3_positive	(Z)-2-Methyl-2-butene-1,4-diol 4-O-beta-D-Glucopyranoside	Others	Saccharides	C11H20O7	-
ME0011363	T3_positive	(E)-2,7-dimethyl-8-[(2R,3R,4S,5S,6R)-3,4,5-trihydroxy-6-(hydroxymethyl)oxan-2-yl]oxydec-4-enedioic acid	Organic acids	Organic acids	C18H30O10	-
ME0143098	T3_positive	3''-Oxogentamicin A2	Heterocyclic compounds	Heterocyclic compounds	C17H31N3O11	C21265
ME0061676	T3_positive	1-hexadecanoyl-2-(9Z-hexadecenoyl)-glycero-3-phospho-(1'-myo-inositol)	Glycerophospholipids	PI	C41H77O13P	-
ME0140356	T3_positive	2-Amino-3-hydroxy-4-methylbenzoyl-AMP	Nucleotides and derivatives	Nucleotides and derivatives	C18H21N6O9P	C21460
ME0112428	T3_positive	3,4,5-Trihydroxy-6-[(3-methylbutanoyl)oxy]oxane-2-carboxylic acid	Organic acids	Organic acids	C11H18O8	-
ME0112099	T3_positive	2-Butyne-1,4-diol	Alcohol and amines	Alcohols	C4H6O2	C02497
MEDP1247	T3_positive	1-Deoxyvaleric-acid	Organic acids	Organic acids	C15H22O2	C20404
ME0112382	T3_positive	3,4,5-trihydroxy-6-(2-oxoethoxy)oxane-2-carboxylic acid	Organic acids	Organic acids	C8H12O8	-
ME0008616	T3_positive	Tenovin-6	Benzene and substituted derivatives	Benzene and substituted derivatives	C25H34N4O2S	-
ME0157934	T3_positive	Tiliacorine	Lignans and Coumarins	Lignans	C36H36N2O5	C09667
ME0105515	T3_positive	Alanylglycylarginine	Amino acids and derivatives	Amino acids and derivatives	C11H22N6O4	-
ME0109436	T3_positive	Prolylthreonine	Amino acids and derivatives	Amino acids and derivatives	C9H16N2O4	-
ME0162274	T3_positive	3,6,7-Trihydroxy-9-oxoxanthen-1-olate	Benzene and substituted derivatives	Benzene and substituted derivatives	C13H7O6-	-
ZINC95910852	T3_positive	Ebracteatoside C	Fatty acyl	Others	C20H36O12	-
ME0010963	T3_positive	(E)-2-methyl-6-(4,4,8,10,14-pentamethyl-3-oxo-5,6,7,9,11,15,16,17-octahydrocyclopenta[a]phenanthren-17-yl)hept-2-enoic acid	Organic acids	Organic acids	C30H44O3	-
ME0059311	T3_positive	PE-NMe(15:0/20:5(5Z,8Z,11Z,14Z,17Z))	Glycerophospholipids	PE	C41H72NO8P	-
ME0061544	T3_positive	PGP(a-13:0/i-12:0)	Glycerophospholipids	PG-P	C31H62O13P2	-
ME0145452	T3_positive	Arg-Met-Met	Amino acids and derivatives	Amino acids and derivatives	C16H32N6O4S2	-
ME0115961	T3_positive	(5-hydroxy-7-methoxy-2,2-dimethyl-3,4-dihydro-2H-1-benzopyran-4-yl)oxidanesulfonic acid	Organic acids	Organic acids	C12H16O7S	-
ME0169093	T3_positive	DL-Pantothenic acid	Organic acids	Organic acids	C9H17NO5	-
ME0139027	T3_positive	Myricanene A 5-[arabinosyl-(1->6)-glucoside]	Benzene and substituted derivatives	Benzene and substituted derivatives	C32H42O13	-
ME0140251	T3_positive	nuatigenin 3-beta-D-glucopyranoside	Terpenoids	Terpene	C33H52O9	C04859
ME0162146	T3_positive	beta-D-apiofuranosyl-(1->6)-D-glucose	Alcohol and amines	Alcohols	C11H20O10	-
ME0129927	T3_positive	[3,4,5-Trihydroxy-6-(hydroxymethyl)oxan-2-yl] 3-hydroxy-4,5-dimethoxybenzoate	Benzene and substituted derivatives	Benzene and substituted derivatives	C15H20O10	-
ME0133706	T3_positive	1-[2-(beta-D-Glucopyranosyloxy)-4,6-dihydroxyphenyl]-3-(4-methoxyphenyl)-1-propanone	Heterocyclic compounds	Heterocyclic compounds	C22H26O10	-
ME0001000	T3_positive	{[(3E)-4-phenylbut-3-en-2-yl]oxy}sulfonic acid	Benzene and substituted derivatives	Benzene and substituted derivatives	C10H12O4S	-
ME0143833	T3_positive	2,3-Dimethyl-6-geranylgeranyl-1,4-benzoquinol	Benzene and substituted derivatives	Benzene and substituted derivatives	C28H42O2	C20738
ME0157497	T3_positive	Thiamin acetic acid	Organic acids	Organic acids	C12H15N4O2S+	C02892
ME0130126	T3_positive	Quercetin 7-O-glucoside	Others	Ketone compounds	C21H20O12	-
ME0112403	T3_positive	3,4,5-Trihydroxy-6-[(1-oxoisochromen-3-yl)methoxy]oxane-2-carboxylic acid	Organic acids	Organic acids	C16H16O9	-
ME0004537	T3_positive	4-[2-(Pyrimidin-2-ylamino)-1,3-thiazol-4-yl]benzene-1,2-diol	Phenolic acids	Phenolic acids	C13H10N4O2S	-
ME0149304	T3_positive	Fucofuroeckol B	Heterocyclic compounds	Heterocyclic compounds	C24H14O11	C10226
ME0130033	T3_positive	Artonin Y	Others	Ketone compounds	C20H18O6	-
pmn001517	T3_positive	3,4,5-Trimethoxyphenyl-1-O-Glucoside	Phenolic acids	Phenolic acids	C15H22O8	-
ME0128681	T3_positive	[3-(5,7-dihydroxy-4-oxo-3,4-dihydro-2H-1-benzopyran-3-yl)-2-hydroxy-6-methoxyphenyl]oxidanesulfonic acid	Organic acids	Organic acids	C16H14O10S	-
ME0111912	T3_positive	2-(Hydroxymethyl)-6-(2,4,6-trihydroxyphenyl)oxane-3,4,5-triol	Alcohol and amines	Alcohols	C12H16O8	-
ME0163352	T3_positive	deacetylcephalosporin C(1-)	Organic acids	Organic acids	C14H18N3O7S-	-
MEDP0154	T3_positive	5,6-dihydrothymine	Nucleotides and derivatives	Nucleotides and derivatives	C5H8N2O2	C00906
ME0141699	T3_positive	1-Caffeoyl-beta-D-glucose	Phenolic acids	Phenolic acids	C15H18O9	C10433
MEDP1676	T3_positive	Phe-Val-Asp	Amino acids and derivatives	Amino acids and derivatives	C18H25N3O6	-
ME0107147	T3_positive	Gly-Pro-Hyp	Amino acids and derivatives	Amino acids and derivatives	C12H19N3O5	-
ME0049042	T3_positive	(2-hydroxy-2-oxo-1,3,2$l^{5}-dioxaphospholan-4-yl)methyl (11Z)-octadec-11-enoate	Glycerophospholipids	PA	C21H39O6P	-
MEDL00444	T3_positive	Pro-Ile	Amino acids and derivatives	Amino acids and derivatives	C11H20N2O3	-
ME0153447	T3_positive	Melithiazol A	Heterocyclic compounds	Heterocyclic compounds	C20H26N2O4S2	-
ME0139879	T3_positive	Tricin 7-[sinapoyl-(->2)-glucuronyl-(1->2)-glucuronide]	Flavonoids	Flavones	C40H40O23	-
MEDP2121	T3_positive	Pentadecylamine	Alcohol and amines	Amines	C15H33N	-
MEDN1221	T3_positive	Mannose 6-phosphate	Others	Saccharides	C6H13O9P	C00275
MEDP0811	T3_positive	2-(Methylthio)benzothiazole	Alkaloids	Alkaloids	C8H7NS2	C10910
MEDL02594	T3_positive	Citromitin	Flavonoids	Flavanones	C21H24O8	-
ME0162712	T3_positive	(2E,6E,10E,14E)-geranylfarnesyl diphosphate	Organic acids	Organic acids	C25H41O7P2-3	-
ME0144177	T3_positive	9-Riburonosylhypoxanthine	Nucleotides and derivatives	Nucleotides and derivatives	C10H10N4O6	-
ME0165379	T3_positive	Neopentalenoketolactone	Organic acids	Organic acids	C15H17O5-	-
ME0112577	T3_positive	3,4,5-trihydroxy-6-{[2-(2-hydroxy-4-methoxyphenyl)propanoyl]oxy}oxane-2-carboxylic acid	Organic acids	Organic acids	C16H20O10	-
ME0146708	T3_positive	Bialaphos	Amino acids and derivatives	Amino acids and derivatives	C11H22N3O6P	C06457
ME0012840	T3_positive	1-hydroxy-5-(4-methoxyphenyl)pentan-3-one	Benzene and substituted derivatives	Benzene and substituted derivatives	C12H16O3	-
ME0132086	T3_positive	3,4,5-trihydroxy-6-{[3-hydroxy-4-({4-methoxy-7-oxo-7H-furo[3,2-g]chromen-9-yl}oxy)-2-methylbutan-2-yl]oxy}oxane-2-carboxylic acid	Organic acids	Organic acids	C23H26O13	-
ME0165924	T3_positive	(2S)-2-azaniumyl-6-(methylsulfanyl)hexanoate	Others	Others	C7H15NO2S	-
ME0131707	T3_positive	3,4,5-Trihydroxy-6-[2-[9-(3-methylbut-2-enoyloxy)-2-oxo-8,9-dihydrouro[2,3-h]chromen-8-yl]propan-2-yloxy]oxane-2-carboxylic acid	Organic acids	Organic acids	C25H28O12	-
ME0003283	T3_positive	2-Naphthoic acid	Benzene and substituted derivatives	Benzene and substituted derivatives	C11H8O2	C14101
ME0129493	T3_positive	1-(2,4-dihydroxyphenyl)-3-{3-[(3,3-dimethyloxiran-2-yl)methyl]-4-hydroxyphenyl}propan-1-one	Others	Ketone compounds	C20H22O5	-
MEDP1522	T3_positive	Carnitine C13:0	Fatty acyl	CAR	C20H39NO4	-
ZINC1841344	T3_positive	Isopropyl isothiocyanate	Others	Lactones	C4H7NS	-
MEDL01986	T3_positive	Pleoside	Phenolic acids	Phenolic acids	C15H20O9	-
ME0131039	T3_positive	3-(2-{4-[2-(dimethylamino)ethoxy]phenyl}-3-ethyl-3-phenyloxiran-2-yl)phenol	Benzene and substituted derivatives	Benzene and substituted derivatives	C26H29NO3	-
ZINC85844973	T3_positive	1,3-Bis[(14R)-13,14-dihydro-13-methyl[1,3]benzodioxolo[5,6-c]-1,3-dioxolo[4,5-i]phenanthridin-14-yl]-2-propanone	Alkaloids	Alkaloids	C43H32N2O9	-
ME0127315	T3_positive	3-Vinyl-4H-1,2-dithiin	Heterocyclic compounds	Heterocyclic compounds	C6H8S2	-
ME0159362	T3_positive	Violaceinic acid	Organic acids	Organic acids	C21H15N3O4	C21135
ME0104195	T3_positive	1,5-Dibutyl methyl hydroxycitrate	Organic acids	Organic acids	C15H26O8	-
ME0163406	T3_positive	1-Ammonio-1-deoxy-scyllo-inositol	Others	Others	C6H14NO5+	-
ME0158210	T3_positive	Trp-Met-Trp	Amino acids and derivatives	Amino acids and derivatives	C27H31N5O4S1	-
ME0105866	T3_positive	Asp-Lys-Arg	Amino acids and derivatives	Amino acids and derivatives	C16H31N7O6	-
MEDP1520	T3_positive	Carnitine C16:2-OH	Fatty acyl	CAR	C23H41NO5	-
ME0155883	T3_positive	Pro-His-Phe	Amino acids and derivatives	Amino acids and derivatives	C20H25N5O4	-
ME0151225	T3_positive	HoPhe-TyrMe-OH	Others	Lactones	C25H24N2O7	-
ME0148032	T3_positive	Cys-Leu-Tyr	Amino acids and derivatives	Amino acids and derivatives	C18H27N3O5S1	-
ME0112413	T3_positive	3,4,5-trihydroxy-6-[(2-hydroxyacetyl)oxy]oxane-2-carboxylic acid	Organic acids	Organic acids	C8H12O9	-
ME0155954	T3_positive	Pro-Phe-Asn	Amino acids and derivatives	Amino acids and derivatives	C18H24N4O5	-
ME0131322	T3_positive	CID 131835430	Alcohol and amines	Alcohols	C43H32O10	-
ME0149793	T3_positive	Gln-Pro-Phe	Amino acids and derivatives	Amino acids and derivatives	C19H26N4O5	-
ME0166841	T3_positive	2-[[(5S)-5-hydroxy-5-(hydroxymethyl)-2-methoxy-3-oxocyclohexen-1-yl]amino]acetate	Others	Lactones	C10H14NO6-	-
ME0166808	T3_positive	2-Acetyl-3-decanoyl-3',4-di(isovaleryl)sucrose	Others	Lactones	C34H58O15	-
ME0150193	T3_positive	Glu-Tyr-Ile-Glu	Amino acids and derivatives	Amino acids and derivatives	C25H36N4O10	-
ME0135478	T3_positive	6-[3,4-dihydroxy-6-(hydroxymethyl)-5-methoxyoxan-2-yl]-2-(3,4-dihydroxyphenyl)-5,7-dihydroxy-4H-chromen-4-one	Others	Ketone compounds	C22H22O11	-
ME0110198	T3_positive	Tyr-Glu-Leu	Amino acids and derivatives	Amino acids and derivatives	C20H29N3O7	-
MEDP0494	T3_positive	1-Pentadecanoyl-sn-glycero-3-phosphocholine	Glycerophospholipids	PC	C23H48NO7P	C04230
ME0104464	T3_positive	2-[(6-Hydroxy-1,3-benzodioxole-5-carbonyl)amino]acetic acid	Organic acids	Organic acids	C10H9NO6	-
ME0148044	T3_positive	Cys-Met-Asp	Amino acids and derivatives	Amino acids and derivatives	C12H21N3O6S2	-
ME0155159	T3_positive	Phe-Gln-Gln	Amino acids and derivatives	Amino acids and derivatives	C19H27N5O6	-
ME0154553	T3_positive	N-Methylpyridinium	Heterocyclic compounds	Heterocyclic compounds	C6H8N+	C02724
ME0105857	T3_positive	Asp-Gly-Lys	Amino acids and derivatives	Amino acids and derivatives	C12H22N4O6	-
ME0150932	T3_positive	His-Glu-Val	Amino acids and derivatives	Amino acids and derivatives	C16H25N5O6	-
ME0150520	T3_positive	Gly-Tyr-Phe	Amino acids and derivatives	Amino acids and derivatives	C20H23N3O5	-
ME0158350	T3_positive	Tyr-Ala-Asp-Lys	Amino acids and derivatives	Amino acids and derivatives	C22H33N5O8	-
ME0162202	T3_positive	3,4,5-trihydroxy-6-[3-[(2S)-1-methyl-5-oxo-pyrrolidin-2-yl]pyridin-1-ium-1-yl]tetrahydropyran-2-carboxylate	Organic acids	Organic acids	C16H20N2O7	-
ME0144585	T3_positive	Ala-His-Ala	Amino acids and derivatives	Amino acids and derivatives	C12H19N5O4	-
ME0128523	T3_positive	[10-butanoyl-5-hydroxy-6-(3-hydroxypropyl)-2,2-dimethyl-8-oxo-2H,3H,4H,8H-pyrano[3,2-g]chromen-3-yl]oxidanesulfonic acid	Organic acids	Organic acids	C21H26O10S	-
ME0158440	T3_positive	Tyr-Gln-Met	Amino acids and derivatives	Amino acids and derivatives	C19H28N4O6S1	-
ME0159009	T3_positive	Val-Gly-His	Amino acids and derivatives	Amino acids and derivatives	C13H21N5O4	-
ME0158580	T3_positive	Tyr-Phe-Val	Amino acids and derivatives	Amino acids and derivatives	C23H29N3O5	-
ME0145724	T3_positive	Asn-Gln-His-Arg	Amino acids and derivatives	Amino acids and derivatives	C21H35N11O7	-
ME0004456	T3_positive	4,4'-Sulfonyldiphenol	Benzene and substituted derivatives	Benzene and substituted derivatives	C12H10O4S	C14216
ME0146014	T3_positive	Asp-Ala-Val	Amino acids and derivatives	Amino acids and derivatives	C12H21N3O6	-
ME0155982	T3_positive	Pro-Pro-Ser	Amino acids and derivatives	Amino acids and derivatives	C13H21N3O5	-
ME0153649	T3_positive	Met-Pro-Met	Amino acids and derivatives	Amino acids and derivatives	C15H27N3O4S2	-
ME0146162	T3_positive	Asp-Ile-Val	Amino acids and derivatives	Amino acids and derivatives	C15H27N3O6	-
ME0125662	T3_positive	N-benzyl-2,3-dihydro-1H-cyclopenta[b]quinolin-9-amine	Alcohol and amines	Amines	C19H18N2	-
ME0166729	T3_positive	(2Z,4E)-2-hydroxy-6-oxo-6-phenoxyhexa-2,4-dienoate	Others	Others	C12H9O5-	-
ME0155811	T3_positive	Pro-Asp-His	Amino acids and derivatives	Amino acids and derivatives	C15H21N5O6	-
ME0110176	T3_positive	Tumonoic acid E	Organic acids	Organic acids	C18H31NO4	-
ME0161654	T3_positive	N-Acetyl-D-glucosaminate	Organic acids	Organic acids	C8H14NO7-	-
ME0115205	T3_positive	Pyridine N-oxide glucuronide	Alkaloids	Pyridine alkaloids	C11H14NO7+	-
ME0146080	T3_positive	Asp-Gln-Gln-Ala-Glu	Amino acids and derivatives	Amino acids and derivatives	C22H35N7O12	-
ME0107431	T3_positive	Ile-Asp-Lys	Amino acids and derivatives	Amino acids and derivatives	C16H30N4O6	-
ME0160559	T3_positive	2-Nitrobenzoate	Benzene and substituted derivatives	Benzene and substituted derivatives	C7H4NO4-	-
ME0158124	T3_positive	Trp-Cys-Phe	Amino acids and derivatives	Amino acids and derivatives	C23H26N4O4S1	-
ME0005123	T3_positive	4-Hydroxypropranolol	Benzene and substituted derivatives	Benzene and substituted derivatives	C16H21NO3	-
ME0155801	T3_positive	Pro-Asn-Ser	Amino acids and derivatives	Amino acids and derivatives	C12H20N4O6	-
ME0152546	T3_positive	Leu-Tyr-Phe	Amino acids and derivatives	Amino acids and derivatives	C24H31N3O5	-
ME0145280	T3_positive	Arg-Asn-Leu-Phe-Gly	Amino acids and derivatives	Amino acids and derivatives	C27H43N9O7	-
ME0107181	T3_positive	Glycyllysyllysine	Amino acids and derivatives	Amino acids and derivatives	C14H29N5O4	-
ME0156765	T3_positive	Ser-Gly-Val-Ser-Glu	Amino acids and derivatives	Amino acids and derivatives	C18H31N5O10	-
ME0123051	T3_positive	2-Methoxy-N-(3-Methyl-2-Oxo-1,2,3,4-Tetrahydroquinazolin-6-Yl)benzenesulfonamide	Alcohol and amines	Amines	C16H17N3O4S	-
ME0166665	T3_positive	(1R)-1,4,5,10-tetrahydrophenazine-1-carboxylate	Organic acids	Organic acids	C13H11N2O2-	-
ME0155251	T3_positive	Phe-Leu-His	Amino acids and derivatives	Amino acids and derivatives	C21H29N5O4	-
ME0156022	T3_positive	Pro-Tyr-Ala	Amino acids and derivatives	Amino acids and derivatives	C17H23N3O5	-
ME0140287	T3_positive	(2R)-O-phospho-3-sulfolactic acid	Others	Lactones	C3H7O9PS	-
ME0157792	T3_positive	Thr-Pro-Val	Amino acids and derivatives	Amino acids and derivatives	C14H25N3O5	-
ME0127639	T3_positive	({1-[6-(5,7-dihydroxy-4-oxo-3,4-dihydro-2H-1-benzopyran-2-yl)-7-hydroxy-2-methyl-2H-chromen-2-yl]-4-methylpent-3-en-1-yl}oxy)sulfonic acid	Organic acids	Organic acids	C25H26O10S	-
MEDL00433	T3_positive	Glutathione Reducedform	Amino acids and derivatives	Amino acids and derivatives	C10H17N3O6S	C00051
ME0151019	T3_positive	His-Lys-Ser	Amino acids and derivatives	Amino acids and derivatives	C15H26N6O5	-
ME0049178	T3_positive	Dehydroabietamide	Alcohol and amines	Amines	C20H29NO	-
ME0150400	T3_positive	Gly-Leu-Asp	Amino acids and derivatives	Amino acids and derivatives	C12H21N3O6	-
ME0145939	T3_positive	Asn-Tyr-Tyr	Amino acids and derivatives	Amino acids and derivatives	C22H26N4O7	-
MEDP1668	T3_positive	Leu-Ala-Val	Amino acids and derivatives	Amino acids and derivatives	C14H27N3O4	-
ME0151222	T3_positive	HoPhe-Ser-OH	Others	Lactones	C18H18N2O7	-
ME0146207	T3_positive	Asp-Met-His	Amino acids and derivatives	Amino acids and derivatives	C15H23N5O6S	-
ME0112590	T3_positive	3,4,5-trihydroxy-6-{[3-(3,4,5-trihydroxyphenyl)propanoyl]oxy}oxane-2-carboxylic acid	Organic acids	Organic acids	C15H18O11	-
ME0155968	T3_positive	Pro-Phe-Tyr-Leu-Arg	Amino acids and derivatives	Amino acids and derivatives	C35H50N8O7	-
ME0150865	T3_positive	His-Asn-Val	Amino acids and derivatives	Amino acids and derivatives	C15H24N6O5	-
ME0144732	T3_positive	Ala-Ser-Leu-Cys-Cys	Amino acids and derivatives	Amino acids and derivatives	C18H33N5O7S2	-
ME0148570	T3_positive	dinor-12-oxo Phytodienoic Acid-d5	Organic acids	Organic acids	C16H19D5O3	-
ME0155328	T3_positive	Phe-Ser-Gly-Thr-Trp	Amino acids and derivatives	Amino acids and derivatives	C29H36N6O8	-
ME0149611	T3_positive	Gln-Ala-Glu-Asp	Amino acids and derivatives	Amino acids and derivatives	C17H27N5O10	-
ME0148011	T3_positive	Cys-Gly-Ile	Amino acids and derivatives	Amino acids and derivatives	C11H21N3O4S1	-
ME0158455	T3_positive	Tyr-Glu-Gln	Amino acids and derivatives	Amino acids and derivatives	C19H26N4O8	-
MEDP1666	T3_positive	Leu-Val-Ser	Amino acids and derivatives	Amino acids and derivatives	C14H27N3O5	-
ME0156722	T3_positive	Ser-Glu-Ala	Amino acids and derivatives	Amino acids and derivatives	C11H19N3O7	-
ME0169577	T3_positive	N-PHENYL-1-NAPHTHYLAMINE	Benzene and substituted derivatives	Benzene and substituted derivatives	C16H13N	C14405
ME0158951	T3_positive	Val-Cys-Ala-Asp-Met	Amino acids and derivatives	Amino acids and derivatives	C20H35N5O8S2	-
ME0114004	T3_positive	NCGC00179726-03_C40H44O22_1,4-Ethanonaphthalene-5,10-dicarboxylic acid, 1,4,4a,5,6,8a-hexahydro-5,10-dihydroxy-6,9-dioxo-, bis[[2-(beta-D-glucopyranosyloxy)-3-hydroxyphenyl]methyl] ester	Benzene and substituted derivatives	Benzene and substituted derivatives	C40H44O22	-
ME0158927	T3_positive	Val-Asn-Tyr-Asp	Amino acids and derivatives	Amino acids and derivatives	C22H31N5O9	-
ME0149769	T3_positive	Gln-Met-Phe	Amino acids and derivatives	Amino acids and derivatives	C19H28N4O5S1	-
ME0110365	T3_positive	Val-Pro-Lys	Amino acids and derivatives	Amino acids and derivatives	C16H30N4O4	-
ME0152405	T3_positive	Leu-Leu-Ser-Pro-Tyr	Amino acids and derivatives	Amino acids and derivatives	C29H45N5O8	-
ME0155776	T3_positive	Pro-Arg-Asp	Amino acids and derivatives	Amino acids and derivatives	C15H26N6O6	-
ME0150106	T3_positive	Glu-Phe-Met	Amino acids and derivatives	Amino acids and derivatives	C19H27N3O6S1	-
ME0152308	T3_positive	Leu-Glu-Arg-Met-Phe	Amino acids and derivatives	Amino acids and derivatives	C31H50N8O8S	-
ME0054110	T3_positive	Isonuatigenin 3-[rhamnosyl-(1->2)-glucoside]	Steroids	Steroid	C39H62O13	-
ME0105461	T3_positive	Ala-Cys-Gly	Amino acids and derivatives	Amino acids and derivatives	C8H15N3O4S1	-
ME0008784	T3_positive	N(4)-Acetylsulfamethazine	Benzene and substituted derivatives	Benzene and substituted derivatives	C14H16N4O3S	-
MEDP1902	T3_positive	LPC(16:2/0:0)	Lipids	LPC	C24H46NO7P	-
ME0109034	T3_positive	palmyramide A	Lipids	Free fatty acids	C36H53N3O9	-
ME0137517	T3_positive	(1E,4Z,6E)-5-hydroxy-1,7-bis(4-hydroxyphenyl)hepta-1,4,6-trien-3-one	Phenolic acids	Phenolic acids	C19H16O4	C17743
ME0107056	T3_positive	Gly-Asp-Lys	Amino acids and derivatives	Amino acids and derivatives	C12H22N4O6	-
ME0105833	T3_positive	Asparagylprolyllysine	Amino acids and derivatives	Amino acids and derivatives	C15H27N5O5	-
ME0166578	T3_positive	[(1R,2R,3S,4R,10R)-10-acetyloxy-3,4-dihydroxy-1,5-dimethylspiro[8-oxatricyclo[7.2.1.02,7]dodec-5-ene-12,2'-oxirane]-2-yl]methyl acetate	Others	Lactones	C19H26O8	-
ME0158524	T3_positive	Tyr-Leu-Phe	Amino acids and derivatives	Amino acids and derivatives	C24H31N3O5	-
ME0162422	T3_positive	alpha-D-xylosyl-(1->6)-beta-D-glucosyl-(1->4)-beta-D-glucose	Alcohol and amines	Alcohols	C17H30O15	-
ME0008674	T3_positive	N-[2-hydroxy-2-(4-methoxyphenyl)ethyl]-3-phenylpropanimidic acid	Phenolic acids	Phenolic acids	C18H21NO3	-
ME0144923	T3_positive	alpha-1,5-L-Arabinotetraose	Others	Saccharides	C20H34O17	C20572
ME0137172	T3_positive	8-[5-(5,7-Dihydroxy-4-oxochromen-2-yl)-2-hydroxyphenyl]-5,6,7-trihydroxy-2-(4-hydroxyphenyl)chromen-4-one	Others	Ketone compounds	C30H18O11	-
MEDL00403	T3_positive	2-Hexadecenal	Fatty acyl	Others	C16H30O	C06123
[truncated: 1,585 more rows]
