# Supplementary material for: Transcriptome-metabolome integration reveals MYB/WRKY-RGA network and phenylalanine metabolism in potato late blight resistance
Source: Research Square preprint supplement (doi:10.21203/rs.3.rs-8142072/v1), 2025-12-04
Supplement: Supplementary file 3 [file 6ea5ce277720dd81b273279f.xlsx]

## Sheet: Sheet1
Supplementary Table S7 Detailed correspondence between TF-HUBG-Metabolite regulatory networks in the MEbalck module
HUBG/TF	TF/Metabolite	Pearson correlation coefficient	P-value	Q-value
Soltu.DM.09G005750	trans-2-Hydroxycinnamate	-0.873072	2.60909e-08	6.10672e-08
Soltu.DM.09G005750	2-Phenylacetamide	-0.875264	2.17714e-08	5.30941e-08
Soltu.DM.09G005750	Phenylacetylglycine	0.876794	1.91487e-08	4.76199e-08
Soltu.DM.09G005750	Fumarate	0.633435	0.000891136	0.000998072
Soltu.DM.09G005750	D-phenylalanine	-0.867298	4.13864e-08	8.85574e-08
Soltu.DM.09G005750	N-Acetyl-L-phenylalanine	-0.617507	0.00130477	0.00144001
Soltu.DM.03G000310	trans-2-Hydroxycinnamate	-0.874809	2.26106e-08	5.47873e-08
Soltu.DM.03G000310	2-Phenylacetamide	-0.874357	2.3474e-08	5.65169e-08
Soltu.DM.03G000310	Phenylacetylglycine	0.868895	3.65061e-08	8.04625e-08
Soltu.DM.03G000310	Fumarate	0.647445	0.000626068	0.000708544
Soltu.DM.03G000310	D-phenylalanine	-0.878524	1.65274e-08	4.17883e-08
Soltu.DM.06G027820	trans-2-Hydroxycinnamate	-0.895004	3.59909e-09	1.21469e-08
Soltu.DM.06G027820	2-Phenylacetamide	-0.890317	5.68894e-09	1.72724e-08
Soltu.DM.06G027820	Phenylacetylglycine	0.855808	9.75522e-08	1.80317e-07
Soltu.DM.06G027820	D-phenylalanine	-0.871606	2.93948e-08	6.75455e-08
Soltu.DM.06G027820	N-Acetyl-L-phenylalanine	-0.615771	0.00135848	0.0014971
Soltu.DM.03G019500	trans-2-Hydroxycinnamate	-0.875464	2.14106e-08	5.25534e-08
Soltu.DM.03G019500	2-Phenylacetamide	-0.893575	4.14769e-09	1.35157e-08
Soltu.DM.03G019500	Phenylacetylglycine	0.871682	2.92154e-08	6.73379e-08
Soltu.DM.03G019500	D-phenylalanine	-0.861128	6.62105e-08	1.29633e-07
Soltu.DM.03G019500	N-Acetyl-L-phenylalanine	-0.627098	0.00103968	0.00115758
Soltu.DM.09G006110	trans-2-Hydroxycinnamate	-0.860869	6.74931e-08	1.31507e-07
Soltu.DM.09G006110	2-Phenylacetamide	-0.858089	8.27734e-08	1.57147e-07
Soltu.DM.09G006110	Phenylacetylglycine	0.832595	4.49637e-07	7.24788e-07
Soltu.DM.09G006110	Fumarate	0.615656	0.00136208	0.00149888
Soltu.DM.09G006110	D-phenylalanine	-0.835071	3.86349e-07	6.32208e-07
Soltu.DM.01G017240	trans-2-Hydroxycinnamate	-0.869773	3.40496e-08	7.65602e-08
Soltu.DM.01G017240	2-Phenylacetamide	-0.890032	5.84597e-09	1.76078e-08
Soltu.DM.01G017240	Phenylacetylglycine	0.841155	2.63283e-07	4.4581e-07
Soltu.DM.01G017240	D-phenylalanine	-0.84382	2.21451e-07	3.82231e-07
Soltu.DM.01G017240	N-Acetyl-L-phenylalanine	-0.664045	0.000402574	0.000459044
Soltu.DM.01G001660	trans-2-Hydroxycinnamate	-0.897994	2.65706e-09	9.43068e-09
Soltu.DM.01G001660	2-Phenylacetamide	-0.921968	1.56376e-10	9.30869e-10
Soltu.DM.01G001660	Phenylacetylglycine	0.835584	3.74266e-07	6.15099e-07
Soltu.DM.01G001660	D-phenylalanine	-0.923839	1.20793e-10	7.54705e-10
Soltu.DM.01G001660	N-Acetyl-L-phenylalanine	-0.627538	0.0010287	0.00114705
Soltu.DM.04G034750	trans-2-Hydroxycinnamate	-0.868456	3.77946e-08	8.21054e-08
Soltu.DM.04G034750	2-Phenylacetamide	-0.856013	9.61318e-08	1.78127e-07
Soltu.DM.04G034750	Phenylacetylglycine	0.838766	3.06632e-07	5.12862e-07
Soltu.DM.04G034750	Fumarate	0.636369	0.000828798	0.000931012
Soltu.DM.04G034750	D-phenylalanine	-0.839234	2.97665e-07	4.98968e-07
Soltu.DM.03G025210	trans-2-Hydroxycinnamate	-0.87344	2.53158e-08	5.98085e-08
Soltu.DM.03G025210	2-Phenylacetamide	-0.867273	4.14674e-08	8.85574e-08
Soltu.DM.03G025210	Phenylacetylglycine	0.863373	5.59524e-08	1.13102e-07
Soltu.DM.03G025210	Fumarate	0.676053	0.000287552	0.000330379
Soltu.DM.03G025210	D-phenylalanine	-0.831336	4.85227e-07	7.72278e-07
Soltu.DM.10G004860	trans-2-Hydroxycinnamate	-0.854229	1.09122e-07	1.99267e-07
Soltu.DM.10G004860	2-Phenylacetamide	-0.873516	2.51575e-08	5.96878e-08
Soltu.DM.10G004860	Phenylacetylglycine	0.869802	3.39715e-08	7.65602e-08
Soltu.DM.10G004860	D-phenylalanine	-0.852215	1.25663e-07	2.26733e-07
Soltu.DM.10G004860	N-Acetyl-L-phenylalanine	-0.672129	0.000321506	0.00036827
Soltu.DM.08G012120	trans-2-Hydroxycinnamate	-0.898275	2.58099e-09	9.29155e-09
Soltu.DM.08G012120	2-Phenylacetamide	-0.915372	3.69981e-10	1.80455e-09
Soltu.DM.08G012120	Phenylacetylglycine	0.805102	2.08927e-06	2.9858e-06
Soltu.DM.08G012120	D-phenylalanine	-0.909747	7.31085e-10	3.14034e-09
Soltu.DM.08G012120	N-Acetyl-L-phenylalanine	-0.61156	0.00149664	0.00163506
Soltu.DM.01G022190	trans-2-Hydroxycinnamate	-0.914666	4.04024e-10	1.93318e-09
Soltu.DM.01G022190	2-Phenylacetamide	-0.935515	2.04631e-11	1.84168e-10
Soltu.DM.01G022190	Phenylacetylglycine	0.810395	1.58459e-06	2.31712e-06
Soltu.DM.01G022190	D-phenylalanine	-0.926954	7.74369e-11	5.37085e-10
Soltu.DM.07G012060	trans-2-Hydroxycinnamate	-0.90905	7.93068e-10	3.34949e-09
Soltu.DM.07G012060	2-Phenylacetamide	-0.898129	2.6202e-09	9.38801e-09
Soltu.DM.07G012060	Phenylacetylglycine	0.865428	4.78362e-08	9.88091e-08
Soltu.DM.07G012060	Fumarate	0.620982	0.0012027	0.00133125
Soltu.DM.07G012060	D-phenylalanine	-0.887442	7.45837e-09	2.15211e-08
Soltu.DM.06G033010	trans-2-Hydroxycinnamate	-0.911427	5.99388e-10	2.69724e-09
Soltu.DM.06G033010	2-Phenylacetamide	-0.924176	1.15228e-10	7.32036e-10
Soltu.DM.06G033010	Phenylacetylglycine	0.834621	3.97221e-07	6.47196e-07
Soltu.DM.06G033010	D-phenylalanine	-0.915251	3.75646e-10	1.82044e-09
Soltu.DM.02G032600	trans-2-Hydroxycinnamate	-0.889036	6.4243e-09	1.90462e-08
Soltu.DM.02G032600	2-Phenylacetamide	-0.900308	2.0873e-09	7.69757e-09
Soltu.DM.02G032600	Phenylacetylglycine	0.821233	8.75255e-07	1.3287e-06
Soltu.DM.02G032600	D-phenylalanine	-0.876439	1.97297e-08	4.89038e-08
Soltu.DM.02G032600	N-Acetyl-L-phenylalanine	-0.628416	0.00100714	0.00112466
Soltu.DM.01G033730	trans-2-Hydroxycinnamate	-0.889755	6.0019e-09	1.79345e-08
Soltu.DM.01G033730	2-Phenylacetamide	-0.882332	1.18589e-08	3.17919e-08
Soltu.DM.01G033730	Phenylacetylglycine	0.878994	1.58744e-08	4.07548e-08
Soltu.DM.01G033730	D-phenylalanine	-0.915626	3.58412e-10	1.77098e-09
Soltu.DM.01G033730	N-Acetyl-L-phenylalanine	-0.613204	0.00144134	0.00157921
Soltu.DM.03G032490	trans-2-Hydroxycinnamate	-0.901012	1.93732e-09	7.28663e-09
Soltu.DM.03G032490	2-Phenylacetamide	-0.923749	1.22319e-10	7.57977e-10
Soltu.DM.03G032490	Phenylacetylglycine	0.806703	1.92335e-06	2.76963e-06
Soltu.DM.03G032490	D-phenylalanine	-0.917158	2.95125e-10	1.56024e-09
Soltu.DM.08G022210	trans-2-Hydroxycinnamate	-0.871978	2.85228e-08	6.61449e-08
Soltu.DM.08G022210	2-Phenylacetamide	-0.856843	9.05758e-08	1.69914e-07
Soltu.DM.08G022210	Phenylacetylglycine	0.84585	1.93683e-07	3.35836e-07
Soltu.DM.08G022210	Fumarate	0.617821	0.00129525	0.00143159
Soltu.DM.08G022210	D-phenylalanine	-0.854246	1.08989e-07	1.99267e-07
Soltu.DM.02G007480	trans-2-Hydroxycinnamate	-0.878778	1.61716e-08	4.1164e-08
Soltu.DM.02G007480	2-Phenylacetamide	-0.849646	1.49988e-07	2.66802e-07
Soltu.DM.02G007480	Phenylacetylglycine	0.8644	5.1751e-08	1.05455e-07
Soltu.DM.02G007480	Fumarate	0.64559	0.000656679	0.000742077
Soltu.DM.02G007480	D-phenylalanine	-0.834325	4.04522e-07	6.57675e-07
Soltu.DM.04G032210	trans-2-Hydroxycinnamate	-0.910072	7.0378e-10	3.04033e-09
Soltu.DM.04G032210	2-Phenylacetamide	-0.903396	1.49865e-09	5.84009e-09
Soltu.DM.04G032210	Phenylacetylglycine	0.870956	3.09753e-08	7.07471e-08
Soltu.DM.04G032210	Fumarate	0.612729	0.00145714	0.00159421
Soltu.DM.04G032210	D-phenylalanine	-0.920833	1.82313e-10	1.02857e-09
Soltu.DM.09G018670	trans-2-Hydroxycinnamate	-0.870743	3.15101e-08	7.17519e-08
Soltu.DM.09G018670	2-Phenylacetamide	-0.89302	4.38004e-09	1.40907e-08
Soltu.DM.09G018670	Phenylacetylglycine	0.847304	1.75755e-07	3.07572e-07
Soltu.DM.09G018670	Fumarate	0.607	0.00165968	0.00180795
Soltu.DM.09G018670	D-phenylalanine	-0.832193	4.60736e-07	7.39442e-07
Soltu.DM.09G018670	N-Acetyl-L-phenylalanine	-0.623187	0.00114156	0.0012682
Soltu.DM.10G021030	trans-2-Hydroxycinnamate	-0.882212	1.19857e-08	3.20182e-08
Soltu.DM.10G021030	2-Phenylacetamide	-0.874311	2.3563e-08	5.65513e-08
Soltu.DM.10G021030	Phenylacetylglycine	0.833833	4.16903e-07	6.74901e-07
Soltu.DM.10G021030	D-phenylalanine	-0.888408	6.81518e-09	1.9893e-08
Soltu.DM.10G021030	N-Acetyl-L-phenylalanine	-0.61483	0.00138837	0.00152559
Soltu.DM.08G029500	trans-2-Hydroxycinnamate	-0.914439	4.15581e-10	1.96362e-09
Soltu.DM.08G029500	2-Phenylacetamide	-0.931497	3.90406e-11	3.04275e-10
Soltu.DM.08G029500	Phenylacetylglycine	0.838605	3.09781e-07	5.16985e-07
Soltu.DM.08G029500	D-phenylalanine	-0.916544	3.19153e-10	1.6526e-09
Soltu.DM.08G029500	N-Acetyl-L-phenylalanine	-0.602449	0.00183728	0.00198995
Soltu.DM.02G032850	trans-2-Hydroxycinnamate	-0.82835	5.79917e-07	9.09579e-07
Soltu.DM.02G032850	2-Phenylacetamide	-0.856941	8.99417e-08	1.69144e-07
Soltu.DM.02G032850	Phenylacetylglycine	0.841174	2.62961e-07	4.4581e-07
Soltu.DM.02G032850	D-phenylalanine	-0.826486	6.47085e-07	1.00451e-06
Soltu.DM.02G032850	N-Acetyl-L-phenylalanine	-0.680557	0.000252467	0.000291397
Soltu.DM.09G018680	trans-2-Hydroxycinnamate	-0.910295	6.85509e-10	2.99564e-09
Soltu.DM.09G018680	2-Phenylacetamide	-0.925212	9.95413e-11	6.65957e-10
Soltu.DM.09G018680	Phenylacetylglycine	0.843562	2.25226e-07	3.87861e-07
Soltu.DM.09G018680	D-phenylalanine	-0.906329	1.08264e-09	4.4151e-09
Soltu.DM.10G013380	trans-2-Hydroxycinnamate	-0.881217	1.3085e-08	3.43481e-08
Soltu.DM.10G013380	2-Phenylacetamide	-0.869474	3.48697e-08	7.75339e-08
Soltu.DM.10G013380	Phenylacetylglycine	0.841854	2.51669e-07	4.29485e-07
Soltu.DM.10G013380	D-phenylalanine	-0.891275	5.18947e-09	1.61089e-08
Soltu.DM.10G013380	N-Acetyl-L-phenylalanine	-0.613791	0.00142201	0.00156029
Soltu.DM.10G020720	trans-2-Hydroxycinnamate	0.881505	1.27578e-08	3.37234e-08
Soltu.DM.10G020720	2-Phenylacetamide	0.915889	3.46714e-10	1.74744e-09
Soltu.DM.10G020720	Phenylacetylglycine	-0.826265	6.55479e-07	1.01545e-06
Soltu.DM.10G020720	D-phenylalanine	0.869367	3.5166e-08	7.79634e-08
Soltu.DM.10G020720	N-Acetyl-L-phenylalanine	0.698338	0.000147679	0.000170972
Soltu.DM.03G010900	trans-2-Hydroxycinnamate	-0.878581	1.64466e-08	4.17237e-08
Soltu.DM.03G010900	2-Phenylacetamide	-0.892726	4.50812e-09	1.42691e-08
Soltu.DM.03G010900	Phenylacetylglycine	0.793235	3.77169e-06	5.04673e-06
Soltu.DM.03G010900	D-phenylalanine	-0.902594	1.63503e-09	6.30653e-09
Soltu.DM.12G022950	trans-2-Hydroxycinnamate	-0.909592	7.44494e-10	3.17987e-09
Soltu.DM.12G022950	2-Phenylacetamide	-0.944358	4.21129e-12	5.30623e-11
Soltu.DM.12G022950	Phenylacetylglycine	0.830016	5.25249e-07	8.30729e-07
Soltu.DM.12G022950	D-phenylalanine	-0.920377	1.93766e-10	1.07711e-09
Soltu.DM.12G022950	N-Acetyl-L-phenylalanine	-0.603831	0.00178173	0.00193255
Soltu.DM.09G027020	trans-2-Hydroxycinnamate	-0.869999	3.34422e-08	7.5777e-08
Soltu.DM.09G027020	2-Phenylacetamide	-0.897602	2.76647e-09	9.72767e-09
Soltu.DM.09G027020	Phenylacetylglycine	0.774295	8.98915e-06	1.14407e-05
Soltu.DM.09G027020	D-phenylalanine	-0.868496	3.76747e-08	8.20808e-08
Soltu.DM.09G027020	N-Acetyl-L-phenylalanine	-0.640503	0.000747342	0.000842013
Soltu.DM.10G005780	trans-2-Hydroxycinnamate	-0.884133	1.00957e-08	2.76533e-08
Soltu.DM.10G005780	2-Phenylacetamide	-0.869501	3.47949e-08	7.75339e-08
Soltu.DM.10G005780	Phenylacetylglycine	0.874973	2.2305e-08	5.42205e-08
Soltu.DM.10G005780	Fumarate	0.651632	0.000561449	0.000636365
Soltu.DM.10G005780	D-phenylalanine	-0.878407	1.66945e-08	4.19304e-08
Soltu.DM.03G021590	trans-2-Hydroxycinnamate	-0.852099	1.26677e-07	2.28018e-07
Soltu.DM.03G021590	2-Phenylacetamide	-0.867034	4.22446e-08	8.89608e-08
Soltu.DM.03G021590	Phenylacetylglycine	0.846393	1.86804e-07	3.26152e-07
Soltu.DM.03G021590	D-phenylalanine	-0.888228	6.93102e-09	2.01533e-08
Soltu.DM.03G021590	N-Acetyl-L-phenylalanine	-0.635747	0.000841695	0.000944097
Soltu.DM.10G015630	trans-2-Hydroxycinnamate	-0.89807	2.63629e-09	9.4011e-09
Soltu.DM.10G015630	2-Phenylacetamide	-0.930044	4.88484e-11	3.58538e-10
Soltu.DM.10G015630	Phenylacetylglycine	0.802918	2.33599e-06	3.28866e-06
Soltu.DM.10G015630	D-phenylalanine	-0.923401	1.28396e-10	7.76541e-10
Soltu.DM.10G015630	N-Acetyl-L-phenylalanine	-0.639575	0.000764997	0.000860622
Soltu.DM.02G031390	trans-2-Hydroxycinnamate	-0.86285	5.82047e-08	1.17029e-07
Soltu.DM.02G031390	2-Phenylacetamide	-0.906063	1.11556e-09	4.46224e-09
Soltu.DM.02G031390	Phenylacetylglycine	0.806734	1.92028e-06	2.76963e-06
Soltu.DM.02G031390	D-phenylalanine	-0.851863	1.28773e-07	2.31241e-07
Soltu.DM.02G031390	N-Acetyl-L-phenylalanine	-0.60898	0.00158711	0.00173139
Soltu.DM.10G003480	trans-2-Hydroxycinnamate	-0.842822	2.3636e-07	4.05189e-07
Soltu.DM.10G003480	2-Phenylacetamide	-0.843353	2.28315e-07	3.92288e-07
Soltu.DM.10G003480	Phenylacetylglycine	0.857014	8.94673e-08	1.68672e-07
Soltu.DM.10G003480	Fumarate	0.628506	0.00100494	0.00112387
Soltu.DM.10G003480	D-phenylalanine	-0.809358	1.67395e-06	2.43786e-06
Soltu.DM.10G003480	N-Acetyl-L-phenylalanine	-0.623157	0.00114238	0.0012682
Soltu.DM.12G002080	trans-2-Hydroxycinnamate	-0.869744	3.4128e-08	7.65602e-08
Soltu.DM.12G002080	2-Phenylacetamide	-0.891256	5.19917e-09	1.61089e-08
Soltu.DM.12G002080	Phenylacetylglycine	0.80935	1.67467e-06	2.43786e-06
Soltu.DM.12G002080	D-phenylalanine	-0.859135	7.66982e-08	1.47167e-07
Soltu.DM.12G002080	N-Acetyl-L-phenylalanine	-0.684864	0.000222458	0.000257153
Soltu.DM.02G008740	trans-2-Hydroxycinnamate	-0.890674	5.49814e-09	1.68283e-08
Soltu.DM.02G008740	2-Phenylacetamide	-0.935854	1.93426e-11	1.79534e-10
Soltu.DM.02G008740	Phenylacetylglycine	0.823728	7.59206e-07	1.15952e-06
Soltu.DM.02G008740	D-phenylalanine	-0.885473	8.94107e-09	2.49426e-08
Soltu.DM.02G008740	N-Acetyl-L-phenylalanine	-0.621289	0.00119404	0.0013236
Soltu.DM.08G029600	trans-2-Hydroxycinnamate	-0.857362	8.72527e-08	1.64908e-07
Soltu.DM.08G029600	2-Phenylacetamide	-0.867042	4.22192e-08	8.89608e-08
Soltu.DM.08G029600	Phenylacetylglycine	0.837956	3.22728e-07	5.33878e-07
Soltu.DM.08G029600	D-phenylalanine	-0.804286	2.17859e-06	3.09008e-06
Soltu.DM.08G029600	N-Acetyl-L-phenylalanine	-0.65489	0.000515245	0.000585752
Soltu.DM.01G031430	trans-2-Hydroxycinnamate	-0.749001	2.5419e-05	3.06487e-05
Soltu.DM.01G031430	2-Phenylacetamide	-0.757	1.85444e-05	2.26488e-05
Soltu.DM.01G031430	Phenylacetylglycine	0.831051	4.93624e-07	7.83991e-07
Soltu.DM.01G031430	Fumarate	0.604688	0.00174798	0.00189866
Soltu.DM.01G031430	D-phenylalanine	-0.743898	3.08983e-05	3.6844e-05
Soltu.DM.01G031430	N-Acetyl-L-phenylalanine	-0.653256	0.000537997	0.000610699
Soltu.DM.10G001920	trans-2-Hydroxycinnamate	-0.780072	6.95927e-06	8.93244e-06
Soltu.DM.10G001920	2-Phenylacetamide	-0.763741	1.40848e-05	1.73421e-05
Soltu.DM.10G001920	Phenylacetylglycine	0.776173	8.27838e-06	1.05717e-05
Soltu.DM.10G001920	Fumarate	0.740402	3.52292e-05	4.18104e-05
Soltu.DM.10G001920	D-phenylalanine	-0.708575	0.000106581	0.000123962
Soltu.DM.12G003910	trans-2-Hydroxycinnamate	-0.793719	3.68459e-06	4.9565e-06
Soltu.DM.12G003910	2-Phenylacetamide	-0.774019	9.09832e-06	1.15602e-05
Soltu.DM.12G003910	Phenylacetylglycine	0.848222	1.65218e-07	2.91834e-07
Soltu.DM.12G003910	Fumarate	0.733468	4.54245e-05	5.32417e-05
Soltu.DM.12G003910	D-phenylalanine	-0.765428	1.31299e-05	1.62992e-05
Soltu.DM.07G028050	trans-2-Hydroxycinnamate	0.892719	4.51101e-09	1.42691e-08
Soltu.DM.07G028050	2-Phenylacetamide	0.885257	9.11862e-09	2.52927e-08
Soltu.DM.07G028050	Phenylacetylglycine	-0.796236	3.26005e-06	4.45678e-06
Soltu.DM.07G028050	D-phenylalanine	0.960649	1.00622e-13	2.17343e-12
Soltu.DM.11G022960	trans-2-Hydroxycinnamate	-0.913799	4.49683e-10	2.07293e-09
Soltu.DM.11G022960	2-Phenylacetamide	-0.931642	3.81699e-11	3.02473e-10
Soltu.DM.11G022960	Phenylacetylglycine	0.832125	4.6264e-07	7.39442e-07
Soltu.DM.11G022960	D-phenylalanine	-0.938997	1.12966e-11	1.12371e-10
Soltu.DM.11G022960	N-Acetyl-L-phenylalanine	-0.605988	0.00169787	0.00184689
Soltu.DM.04G019240	trans-2-Hydroxycinnamate	0.828862	5.6261e-07	8.8796e-07
Soltu.DM.04G019240	2-Phenylacetamide	0.748699	2.57182e-05	3.09296e-05
Soltu.DM.04G019240	Phenylacetylglycine	-0.780285	6.89294e-06	8.86236e-06
Soltu.DM.04G019240	Fumarate	-0.659079	0.0004607	0.000524532
Soltu.DM.04G019240	D-phenylalanine	0.667856	0.000362382	0.000414464
Soltu.DM.02G023720	trans-2-Hydroxycinnamate	0.768732	1.1423e-05	1.4274e-05
Soltu.DM.02G023720	2-Phenylacetamide	0.79041	4.31703e-06	5.67824e-06
Soltu.DM.02G023720	Phenylacetylglycine	-0.797846	3.01193e-06	4.14757e-06
Soltu.DM.02G023720	D-phenylalanine	0.776895	8.01845e-06	1.02571e-05
Soltu.DM.02G023720	N-Acetyl-L-phenylalanine	0.676888	0.000280747	0.000323544
Soltu.DM.03G024640	trans-2-Hydroxycinnamate	-0.771947	9.95403e-06	1.25421e-05
Soltu.DM.03G024640	2-Phenylacetamide	-0.806207	1.9734e-06	2.83091e-06
Soltu.DM.03G024640	Phenylacetylglycine	0.699859	0.000140814	0.000163275
Soltu.DM.03G024640	D-phenylalanine	-0.808233	1.77587e-06	2.56703e-06
Soltu.DM.07G018240	Phenylacetylglycine	0.672345	0.00031955	0.000366585
Soltu.DM.04G030580	trans-2-Hydroxycinnamate	-0.71367	9.01516e-05	0.000105015
Soltu.DM.04G030580	2-Phenylacetamide	-0.641022	0.000737633	0.000832314
Soltu.DM.04G030580	Phenylacetylglycine	0.759584	1.67065e-05	2.05298e-05
Soltu.DM.04G030580	Fumarate	0.667491	0.000366073	0.000418053
Soltu.DM.04G030580	D-phenylalanine	-0.704549	0.000121361	0.000140935
Soltu.DM.01G035890	trans-2-Hydroxycinnamate	0.911679	5.81602e-10	2.63288e-09
Soltu.DM.01G035890	2-Phenylacetamide	0.865579	4.72813e-08	9.79305e-08
Soltu.DM.01G035890	Phenylacetylglycine	-0.812138	1.44404e-06	2.13639e-06
Soltu.DM.01G035890	Fumarate	-0.676397	0.000284735	0.000327641
Soltu.DM.01G035890	D-phenylalanine	0.923424	1.27992e-10	7.76541e-10
Soltu.DM.07G025330	trans-2-Hydroxycinnamate	-0.918206	2.57832e-10	1.40357e-09
Soltu.DM.07G025330	2-Phenylacetamide	-0.934392	2.46157e-11	2.15936e-10
Soltu.DM.07G025330	Phenylacetylglycine	0.804396	2.16634e-06	3.07848e-06
Soltu.DM.07G025330	D-phenylalanine	-0.96349	4.47048e-14	1.25174e-12
Soltu.DM.09G005750	Soltu.DM.01G031430	0.916192	3.33728e-10	1.71518e-09
Soltu.DM.09G005750	Soltu.DM.10G001920	0.851529	1.31786e-07	2.3609e-07
Soltu.DM.09G005750	Soltu.DM.12G003910	0.911736	5.77612e-10	2.63057e-09
Soltu.DM.09G005750	Soltu.DM.07G028050	-0.894925	3.62741e-09	1.21881e-08
Soltu.DM.09G005750	Soltu.DM.11G022960	0.970868	3.86196e-15	1.53665e-13
Soltu.DM.09G005750	Soltu.DM.04G019240	-0.821834	8.45955e-07	1.2894e-06
Soltu.DM.09G005750	Soltu.DM.02G023720	-0.885239	9.13346e-09	2.52927e-08
Soltu.DM.09G005750	Soltu.DM.03G024640	0.918199	2.58063e-10	1.40357e-09
Soltu.DM.09G005750	Soltu.DM.07G018240	0.783704	5.90174e-06	7.65303e-06
Soltu.DM.09G005750	Soltu.DM.04G030580	0.848123	1.66326e-07	2.93105e-07
Soltu.DM.09G005750	Soltu.DM.01G035890	-0.923563	1.25538e-10	7.71598e-10
Soltu.DM.09G005750	Soltu.DM.07G025330	0.946348	2.84786e-12	3.77716e-11
Soltu.DM.03G000310	Soltu.DM.01G031430	0.92493	1.03601e-10	6.75192e-10
Soltu.DM.03G000310	Soltu.DM.10G001920	0.841523	2.57119e-07	4.37798e-07
Soltu.DM.03G000310	Soltu.DM.12G003910	0.924677	1.07375e-10	6.8793e-10
Soltu.DM.03G000310	Soltu.DM.07G028050	-0.896423	3.11988e-09	1.06725e-08
Soltu.DM.03G000310	Soltu.DM.11G022960	0.972319	2.21672e-15	1.22052e-13
Soltu.DM.03G000310	Soltu.DM.04G019240	-0.834649	3.96531e-07	6.47196e-07
Soltu.DM.03G000310	Soltu.DM.02G023720	-0.874157	2.38647e-08	5.69138e-08
Soltu.DM.03G000310	Soltu.DM.03G024640	0.928794	5.89992e-11	4.20787e-10
Soltu.DM.03G000310	Soltu.DM.07G018240	0.784566	5.67273e-06	7.38138e-06
Soltu.DM.03G000310	Soltu.DM.04G030580	0.837868	3.24513e-07	5.35659e-07
Soltu.DM.03G000310	Soltu.DM.01G035890	-0.934334	2.48498e-11	2.15936e-10
Soltu.DM.03G000310	Soltu.DM.07G025330	0.949177	1.59024e-12	2.22634e-11
Soltu.DM.06G027820	Soltu.DM.01G031430	0.860523	6.92486e-08	1.34236e-07
Soltu.DM.06G027820	Soltu.DM.10G001920	0.808949	1.71036e-06	2.48183e-06
Soltu.DM.06G027820	Soltu.DM.12G003910	0.860355	7.01138e-08	1.35219e-07
Soltu.DM.06G027820	Soltu.DM.07G028050	-0.896908	2.96982e-09	1.0299e-08
Soltu.DM.06G027820	Soltu.DM.11G022960	0.960222	1.13063e-13	2.37431e-12
Soltu.DM.06G027820	Soltu.DM.04G019240	-0.839801	2.8713e-07	4.82379e-07
Soltu.DM.06G027820	Soltu.DM.02G023720	-0.901959	1.75077e-09	6.68475e-09
Soltu.DM.06G027820	Soltu.DM.03G024640	0.907326	9.67031e-10	3.99495e-09
Soltu.DM.06G027820	Soltu.DM.07G018240	0.730316	5.08611e-05	5.94296e-05
Soltu.DM.06G027820	Soltu.DM.04G030580	0.812315	1.43043e-06	2.1204e-06
Soltu.DM.06G027820	Soltu.DM.01G035890	-0.917382	2.86761e-10	1.5267e-09
Soltu.DM.06G027820	Soltu.DM.07G025330	0.932435	3.36977e-11	2.75416e-10
Soltu.DM.03G019500	Soltu.DM.01G031430	0.893342	4.24358e-09	1.37689e-08
Soltu.DM.03G019500	Soltu.DM.10G001920	0.847879	1.69093e-07	2.9729e-07
Soltu.DM.03G019500	Soltu.DM.12G003910	0.893822	4.04755e-09	1.33041e-08
Soltu.DM.03G019500	Soltu.DM.07G028050	-0.892318	4.69109e-09	1.47156e-08
Soltu.DM.03G019500	Soltu.DM.11G022960	0.962728	5.59125e-14	1.50964e-12
Soltu.DM.03G019500	Soltu.DM.04G019240	-0.828677	5.68816e-07	8.95885e-07
Soltu.DM.03G019500	Soltu.DM.02G023720	-0.884653	9.63222e-09	2.65765e-08
Soltu.DM.03G019500	Soltu.DM.03G024640	0.892743	4.50042e-09	1.42691e-08
Soltu.DM.03G019500	Soltu.DM.07G018240	0.78963	4.47956e-06	5.87943e-06
Soltu.DM.03G019500	Soltu.DM.04G030580	0.828206	5.84874e-07	9.15455e-07
Soltu.DM.03G019500	Soltu.DM.01G035890	-0.917771	2.72752e-10	1.46242e-09
Soltu.DM.03G019500	Soltu.DM.07G025330	0.935758	1.96559e-11	1.79534e-10
Soltu.DM.09G006110	Soltu.DM.01G031430	0.873503	2.51857e-08	5.96878e-08
Soltu.DM.09G006110	Soltu.DM.10G001920	0.798326	2.94124e-06	4.06504e-06
Soltu.DM.09G006110	Soltu.DM.12G003910	0.86525	4.8492e-08	9.9891e-08
Soltu.DM.09G006110	Soltu.DM.07G028050	-0.867155	4.18506e-08	8.86248e-08
Soltu.DM.09G006110	Soltu.DM.11G022960	0.943298	5.15772e-12	6.09255e-11
Soltu.DM.09G006110	Soltu.DM.04G019240	-0.836057	3.63436e-07	5.986e-07
Soltu.DM.09G006110	Soltu.DM.02G023720	-0.858062	8.29387e-08	1.57147e-07
Soltu.DM.09G006110	Soltu.DM.03G024640	0.928092	6.55073e-11	4.62837e-10
Soltu.DM.09G006110	Soltu.DM.07G018240	0.79966	2.75246e-06	3.83216e-06
Soltu.DM.09G006110	Soltu.DM.04G030580	0.812737	1.39835e-06	2.07692e-06
Soltu.DM.09G006110	Soltu.DM.01G035890	-0.906299	1.08626e-09	4.4151e-09
Soltu.DM.09G006110	Soltu.DM.07G025330	0.914147	4.30823e-10	2.01051e-09
Soltu.DM.01G017240	Soltu.DM.01G031430	0.887029	7.7498e-09	2.21926e-08
Soltu.DM.01G017240	Soltu.DM.10G001920	0.782412	6.26024e-06	8.09015e-06
Soltu.DM.01G017240	Soltu.DM.12G003910	0.851105	1.35698e-07	2.42524e-07
Soltu.DM.01G017240	Soltu.DM.07G028050	-0.868753	3.69198e-08	8.11376e-08
Soltu.DM.01G017240	Soltu.DM.11G022960	0.953035	6.79462e-13	1.02735e-11
Soltu.DM.01G017240	Soltu.DM.04G019240	-0.824985	7.06134e-07	1.08724e-06
Soltu.DM.01G017240	Soltu.DM.02G023720	-0.878437	1.66516e-08	4.19304e-08
Soltu.DM.01G017240	Soltu.DM.03G024640	0.904489	1.3292e-09	5.20662e-09
Soltu.DM.01G017240	Soltu.DM.07G018240	0.770145	1.07552e-05	1.35066e-05
Soltu.DM.01G017240	Soltu.DM.04G030580	0.773112	9.46458e-06	1.19453e-05
Soltu.DM.01G017240	Soltu.DM.01G035890	-0.888845	6.54112e-09	1.93167e-08
Soltu.DM.01G017240	Soltu.DM.07G025330	0.932401	3.38805e-11	2.75416e-10
Soltu.DM.01G001660	Soltu.DM.01G031430	0.884262	9.97861e-09	2.74321e-08
Soltu.DM.01G001660	Soltu.DM.10G001920	0.810713	1.55809e-06	2.28279e-06
Soltu.DM.01G001660	Soltu.DM.12G003910	0.894667	3.72223e-09	1.24514e-08
Soltu.DM.01G001660	Soltu.DM.07G028050	-0.939088	1.11166e-11	1.12055e-10
Soltu.DM.01G001660	Soltu.DM.11G022960	0.990443	2.00291e-20	1.5142e-17
Soltu.DM.01G001660	Soltu.DM.04G019240	-0.793042	3.80685e-06	5.08476e-06
Soltu.DM.01G001660	Soltu.DM.02G023720	-0.881712	1.25274e-08	3.32306e-08
Soltu.DM.01G001660	Soltu.DM.03G024640	0.921671	1.62807e-10	9.54125e-10
Soltu.DM.01G001660	Soltu.DM.07G018240	0.743412	3.14711e-05	3.74679e-05
Soltu.DM.01G001660	Soltu.DM.04G030580	0.811116	1.52508e-06	2.23876e-06
Soltu.DM.01G001660	Soltu.DM.01G035890	-0.935741	1.97108e-11	1.79534e-10
Soltu.DM.01G001660	Soltu.DM.07G025330	0.9719	2.61015e-15	1.22052e-13
Soltu.DM.04G034750	Soltu.DM.01G031430	0.907436	9.54959e-10	3.96675e-09
Soltu.DM.04G034750	Soltu.DM.10G001920	0.819314	9.75017e-07	1.47423e-06
Soltu.DM.04G034750	Soltu.DM.12G003910	0.893761	4.07194e-09	1.33264e-08
Soltu.DM.04G034750	Soltu.DM.07G028050	-0.861172	6.59915e-08	1.29633e-07
Soltu.DM.04G034750	Soltu.DM.11G022960	0.952555	7.58314e-13	1.10247e-11
Soltu.DM.04G034750	Soltu.DM.04G019240	-0.838528	3.11284e-07	5.1721e-07
Soltu.DM.04G034750	Soltu.DM.02G023720	-0.875856	2.07198e-08	5.10234e-08
Soltu.DM.04G034750	Soltu.DM.03G024640	0.945066	3.67055e-12	4.78438e-11
Soltu.DM.04G034750	Soltu.DM.07G018240	0.764024	1.39203e-05	1.71677e-05
Soltu.DM.04G034750	Soltu.DM.04G030580	0.805619	2.03434e-06	2.9128e-06
Soltu.DM.04G034750	Soltu.DM.01G035890	-0.906236	1.09399e-09	4.42278e-09
Soltu.DM.04G034750	Soltu.DM.07G025330	0.928815	5.88138e-11	4.20787e-10
Soltu.DM.03G025210	Soltu.DM.01G031430	0.8911	5.27754e-09	1.62188e-08
Soltu.DM.03G025210	Soltu.DM.10G001920	0.861947	6.22862e-08	1.24572e-07
Soltu.DM.03G025210	Soltu.DM.12G003910	0.910075	7.03495e-10	3.04033e-09
Soltu.DM.03G025210	Soltu.DM.07G028050	-0.866951	4.25191e-08	8.90428e-08
Soltu.DM.03G025210	Soltu.DM.11G022960	0.949406	1.51503e-12	2.16106e-11
Soltu.DM.03G025210	Soltu.DM.04G019240	-0.854803	1.0478e-07	1.92266e-07
Soltu.DM.03G025210	Soltu.DM.02G023720	-0.864933	4.9688e-08	1.01835e-07
Soltu.DM.03G025210	Soltu.DM.03G024640	0.911023	6.28967e-10	2.7807e-09
Soltu.DM.03G025210	Soltu.DM.07G018240	0.791541	4.09081e-06	5.4257e-06
Soltu.DM.03G025210	Soltu.DM.04G030580	0.831427	4.82558e-07	7.6965e-07
Soltu.DM.03G025210	Soltu.DM.01G035890	-0.92067	1.86321e-10	1.0434e-09
Soltu.DM.03G025210	Soltu.DM.07G025330	0.915694	3.55363e-10	1.76746e-09
Soltu.DM.10G004860	Soltu.DM.01G031430	0.921407	1.68743e-10	9.66436e-10
Soltu.DM.10G004860	Soltu.DM.10G001920	0.811593	1.48676e-06	2.19101e-06
Soltu.DM.10G004860	Soltu.DM.12G003910	0.888457	6.78438e-09	1.98798e-08
Soltu.DM.10G004860	Soltu.DM.07G028050	-0.882816	1.13596e-08	3.05617e-08
Soltu.DM.10G004860	Soltu.DM.11G022960	0.961824	7.24828e-14	1.71241e-12
Soltu.DM.10G004860	Soltu.DM.04G019240	-0.801658	2.48992e-06	3.49236e-06
Soltu.DM.10G004860	Soltu.DM.02G023720	-0.881423	1.28506e-08	3.38503e-08
Soltu.DM.10G004860	Soltu.DM.03G024640	0.90323	1.5259e-09	5.9158e-09
Soltu.DM.10G004860	Soltu.DM.07G018240	0.796962	3.14605e-06	4.31654e-06
Soltu.DM.10G004860	Soltu.DM.04G030580	0.816199	1.15865e-06	1.7449e-06
Soltu.DM.10G004860	Soltu.DM.01G035890	-0.899916	2.17531e-09	7.9446e-09
Soltu.DM.10G004860	Soltu.DM.07G025330	0.939501	1.03358e-11	1.0709e-10
Soltu.DM.08G012120	Soltu.DM.01G031430	0.862581	5.93926e-08	1.191e-07
Soltu.DM.08G012120	Soltu.DM.10G001920	0.759552	1.6728e-05	2.05298e-05
Soltu.DM.08G012120	Soltu.DM.12G003910	0.832126	4.62594e-07	7.39442e-07
Soltu.DM.08G012120	Soltu.DM.07G028050	-0.916611	3.16439e-10	1.64985e-09
Soltu.DM.08G012120	Soltu.DM.11G022960	0.969575	6.19106e-15	2.22878e-13
Soltu.DM.08G012120	Soltu.DM.04G019240	-0.800547	2.63303e-06	3.67942e-06
Soltu.DM.08G012120	Soltu.DM.02G023720	-0.86956	3.46318e-08	7.74605e-08
Soltu.DM.08G012120	Soltu.DM.03G024640	0.920109	2.0081e-10	1.10812e-09
Soltu.DM.08G012120	Soltu.DM.07G018240	0.731857	4.81365e-05	5.63332e-05
Soltu.DM.08G012120	Soltu.DM.04G030580	0.766566	1.25179e-05	1.5565e-05
Soltu.DM.08G012120	Soltu.DM.01G035890	-0.915767	3.52112e-10	1.76289e-09
Soltu.DM.08G012120	Soltu.DM.07G025330	0.964428	3.37244e-14	9.80601e-13
Soltu.DM.01G022190	Soltu.DM.01G031430	0.854949	1.03702e-07	1.91217e-07
Soltu.DM.01G022190	Soltu.DM.10G001920	0.796667	3.19198e-06	4.37162e-06
Soltu.DM.01G022190	Soltu.DM.12G003910	0.861457	6.46089e-08	1.27865e-07
Soltu.DM.01G022190	Soltu.DM.07G028050	-0.939582	1.01892e-11	1.0709e-10
Soltu.DM.01G022190	Soltu.DM.11G022960	0.981656	2.50536e-17	4.8112e-15
Soltu.DM.01G022190	Soltu.DM.04G019240	-0.806308	1.96312e-06	2.82152e-06
Soltu.DM.01G022190	Soltu.DM.02G023720	-0.866615	4.36442e-08	9.08953e-08
Soltu.DM.01G022190	Soltu.DM.03G024640	0.916839	3.07383e-10	1.61376e-09
Soltu.DM.01G022190	Soltu.DM.07G018240	0.736755	4.0307e-05	4.74643e-05
Soltu.DM.01G022190	Soltu.DM.04G030580	0.790402	4.31877e-06	5.67824e-06
Soltu.DM.01G022190	Soltu.DM.01G035890	-0.938338	1.26745e-11	1.24441e-10
Soltu.DM.01G022190	Soltu.DM.07G025330	0.968129	1.02478e-14	3.36841e-13
Soltu.DM.07G012060	Soltu.DM.01G031430	0.864625	5.08721e-08	1.03944e-07
Soltu.DM.07G012060	Soltu.DM.10G001920	0.846234	1.88795e-07	3.28868e-07
Soltu.DM.07G012060	Soltu.DM.12G003910	0.886872	7.86292e-09	2.24316e-08
Soltu.DM.07G012060	Soltu.DM.07G028050	-0.914818	3.96474e-10	1.90913e-09
Soltu.DM.07G012060	Soltu.DM.11G022960	0.961948	6.99646e-14	1.70623e-12
Soltu.DM.07G012060	Soltu.DM.04G019240	-0.838537	3.11119e-07	5.1721e-07
Soltu.DM.07G012060	Soltu.DM.02G023720	-0.86115	6.61029e-08	1.29633e-07
Soltu.DM.07G012060	Soltu.DM.03G024640	0.891867	4.90097e-09	1.53105e-08
Soltu.DM.07G012060	Soltu.DM.07G018240	0.745681	2.88759e-05	3.46511e-05
Soltu.DM.07G012060	Soltu.DM.04G030580	0.801372	2.52608e-06	3.53651e-06
Soltu.DM.07G012060	Soltu.DM.01G035890	-0.933645	2.77815e-11	2.35986e-10
Soltu.DM.07G012060	Soltu.DM.07G025330	0.942217	6.3162e-12	7.34623e-11
Soltu.DM.06G033010	Soltu.DM.01G031430	0.846096	1.90538e-07	3.31141e-07
Soltu.DM.06G033010	Soltu.DM.10G001920	0.794297	3.58299e-06	4.83704e-06
Soltu.DM.06G033010	Soltu.DM.12G003910	0.849422	1.52298e-07	2.70275e-07
Soltu.DM.06G033010	Soltu.DM.07G028050	-0.930823	4.33444e-11	3.30993e-10
Soltu.DM.06G033010	Soltu.DM.11G022960	0.976081	4.52314e-16	3.10863e-14
Soltu.DM.06G033010	Soltu.DM.04G019240	-0.796046	3.29052e-06	4.49031e-06
Soltu.DM.06G033010	Soltu.DM.02G023720	-0.868045	3.90339e-08	8.43131e-08
Soltu.DM.06G033010	Soltu.DM.03G024640	0.900537	2.03747e-09	7.55062e-09
Soltu.DM.06G033010	Soltu.DM.07G018240	0.744104	3.06582e-05	3.66154e-05
Soltu.DM.06G033010	Soltu.DM.04G030580	0.792365	3.93264e-06	5.22509e-06
Soltu.DM.06G033010	Soltu.DM.01G035890	-0.940547	8.57398e-12	9.3941e-11
Soltu.DM.06G033010	Soltu.DM.07G025330	0.962023	6.84942e-14	1.70623e-12
Soltu.DM.02G032600	Soltu.DM.01G031430	0.848348	1.63816e-07	2.90034e-07
Soltu.DM.02G032600	Soltu.DM.10G001920	0.749621	2.48161e-05	3.00657e-05
Soltu.DM.02G032600	Soltu.DM.12G003910	0.824422	7.29478e-07	1.11637e-06
Soltu.DM.02G032600	Soltu.DM.07G028050	-0.896616	3.05933e-09	1.0513e-08
Soltu.DM.02G032600	Soltu.DM.11G022960	0.95522	4.06466e-13	6.85671e-12
Soltu.DM.02G032600	Soltu.DM.04G019240	-0.814626	1.26259e-06	1.89013e-06
Soltu.DM.02G032600	Soltu.DM.02G023720	-0.864363	5.18979e-08	1.0547e-07
Soltu.DM.02G032600	Soltu.DM.03G024640	0.907714	9.25113e-10	3.86401e-09
Soltu.DM.02G032600	Soltu.DM.07G018240	0.745632	2.893e-05	3.4661e-05
Soltu.DM.02G032600	Soltu.DM.04G030580	0.751979	2.26349e-05	2.75439e-05
Soltu.DM.02G032600	Soltu.DM.01G035890	-0.898909	2.41694e-09	8.78466e-09
Soltu.DM.02G032600	Soltu.DM.07G025330	0.939498	1.03407e-11	1.0709e-10
Soltu.DM.01G033730	Soltu.DM.01G031430	0.894183	3.90559e-09	1.30072e-08
Soltu.DM.01G033730	Soltu.DM.10G001920	0.803725	2.242e-06	3.16222e-06
Soltu.DM.01G033730	Soltu.DM.12G003910	0.874557	2.30884e-08	5.57661e-08
Soltu.DM.01G033730	Soltu.DM.07G028050	-0.937051	1.58105e-11	1.49409e-10
Soltu.DM.01G033730	Soltu.DM.11G022960	0.976113	4.45816e-16	3.10863e-14
Soltu.DM.01G033730	Soltu.DM.04G019240	-0.798757	2.87895e-06	3.98624e-06
Soltu.DM.01G033730	Soltu.DM.02G023720	-0.883227	1.09506e-08	2.95667e-08
Soltu.DM.01G033730	Soltu.DM.03G024640	0.896619	3.05847e-09	1.0513e-08
Soltu.DM.01G033730	Soltu.DM.07G018240	0.75033	2.41411e-05	2.92948e-05
Soltu.DM.01G033730	Soltu.DM.04G030580	0.840234	2.79306e-07	4.70278e-07
Soltu.DM.01G033730	Soltu.DM.01G035890	-0.938025	1.33812e-11	1.29695e-10
Soltu.DM.01G033730	Soltu.DM.07G025330	0.967774	1.15565e-14	3.6403e-13
Soltu.DM.03G032490	Soltu.DM.01G031430	0.863777	5.42636e-08	1.09982e-07
Soltu.DM.03G032490	Soltu.DM.10G001920	0.785348	5.47163e-06	7.13199e-06
Soltu.DM.03G032490	Soltu.DM.12G003910	0.858415	8.0835e-08	1.54712e-07
Soltu.DM.03G032490	Soltu.DM.07G028050	-0.921603	1.64318e-10	9.55573e-10
Soltu.DM.03G032490	Soltu.DM.11G022960	0.981227	3.22492e-17	4.8112e-15
Soltu.DM.03G032490	Soltu.DM.04G019240	-0.79549	3.38115e-06	4.60568e-06
Soltu.DM.03G032490	Soltu.DM.02G023720	-0.858367	8.11172e-08	1.5486e-07
Soltu.DM.03G032490	Soltu.DM.03G024640	0.927763	6.8777e-11	4.81439e-10
Soltu.DM.03G032490	Soltu.DM.07G018240	0.748683	2.57338e-05	3.09296e-05
Soltu.DM.03G032490	Soltu.DM.04G030580	0.792508	3.90577e-06	5.19853e-06
Soltu.DM.03G032490	Soltu.DM.01G035890	-0.94088	8.07208e-12	9.10337e-11
Soltu.DM.03G032490	Soltu.DM.07G025330	0.969892	5.52447e-15	2.08825e-13
Soltu.DM.08G022210	Soltu.DM.01G031430	0.880887	1.34682e-08	3.52317e-08
Soltu.DM.08G022210	Soltu.DM.10G001920	0.793608	3.70441e-06	4.97431e-06
Soltu.DM.08G022210	Soltu.DM.12G003910	0.868605	3.73521e-08	8.16132e-08
Soltu.DM.08G022210	Soltu.DM.07G028050	-0.880474	1.39639e-08	3.64024e-08
Soltu.DM.08G022210	Soltu.DM.11G022960	0.944131	4.39976e-12	5.44263e-11
Soltu.DM.08G022210	Soltu.DM.04G019240	-0.841136	2.63594e-07	4.4581e-07
Soltu.DM.08G022210	Soltu.DM.02G023720	-0.860369	7.00398e-08	1.35219e-07
Soltu.DM.08G022210	Soltu.DM.03G024640	0.914066	4.35164e-10	2.01831e-09
Soltu.DM.08G022210	Soltu.DM.07G018240	0.786616	5.15932e-06	6.75987e-06
Soltu.DM.08G022210	Soltu.DM.04G030580	0.804037	2.20649e-06	3.11795e-06
Soltu.DM.08G022210	Soltu.DM.01G035890	-0.916025	3.40833e-10	1.72933e-09
Soltu.DM.08G022210	Soltu.DM.07G025330	0.926175	8.67076e-11	5.89731e-10
Soltu.DM.02G007480	Soltu.DM.01G031430	0.860692	6.83858e-08	1.32904e-07
Soltu.DM.02G007480	Soltu.DM.10G001920	0.826127	6.60811e-07	1.02162e-06
Soltu.DM.02G007480	Soltu.DM.12G003910	0.877469	1.80848e-08	4.52718e-08
Soltu.DM.02G007480	Soltu.DM.07G028050	-0.871272	3.01983e-08	6.91817e-08
Soltu.DM.02G007480	Soltu.DM.11G022960	0.935302	2.11987e-11	1.88543e-10
Soltu.DM.02G007480	Soltu.DM.04G019240	-0.853631	1.13819e-07	2.06844e-07
Soltu.DM.02G007480	Soltu.DM.02G023720	-0.868341	3.81381e-08	8.26143e-08
Soltu.DM.02G007480	Soltu.DM.03G024640	0.901965	1.7498e-09	6.68475e-09
Soltu.DM.02G007480	Soltu.DM.07G018240	0.773508	9.30311e-06	1.18006e-05
Soltu.DM.02G007480	Soltu.DM.04G030580	0.804579	2.14606e-06	3.05541e-06
Soltu.DM.02G007480	Soltu.DM.01G035890	-0.909175	7.81605e-10	3.31963e-09
Soltu.DM.02G007480	Soltu.DM.07G025330	0.906164	1.10294e-09	4.43523e-09
Soltu.DM.04G032210	Soltu.DM.01G031430	0.897506	2.79379e-09	9.77828e-09
Soltu.DM.04G032210	Soltu.DM.10G001920	0.858099	8.27162e-08	1.57147e-07
Soltu.DM.04G032210	Soltu.DM.12G003910	0.921245	1.72461e-10	9.80307e-10
Soltu.DM.04G032210	Soltu.DM.07G028050	-0.933121	3.02178e-11	2.53829e-10
Soltu.DM.04G032210	Soltu.DM.11G022960	0.984363	4.38013e-18	1.65569e-15
Soltu.DM.04G032210	Soltu.DM.04G019240	-0.809325	1.67683e-06	2.43786e-06
Soltu.DM.04G032210	Soltu.DM.02G023720	-0.867177	4.17774e-08	8.86248e-08
Soltu.DM.04G032210	Soltu.DM.03G024640	0.900858	1.96918e-09	7.36982e-09
Soltu.DM.04G032210	Soltu.DM.07G018240	0.739368	3.66078e-05	4.33106e-05
Soltu.DM.04G032210	Soltu.DM.04G030580	0.835478	3.76734e-07	6.17811e-07
Soltu.DM.04G032210	Soltu.DM.01G035890	-0.953138	6.63638e-13	1.0239e-11
Soltu.DM.04G032210	Soltu.DM.07G025330	0.967344	1.3341e-14	4.03431e-13
Soltu.DM.09G018670	Soltu.DM.01G031430	0.918086	2.61881e-10	1.41416e-09
Soltu.DM.09G018670	Soltu.DM.10G001920	0.856619	9.20489e-08	1.7225e-07
Soltu.DM.09G018670	Soltu.DM.12G003910	0.901599	1.81976e-09	6.91326e-09
Soltu.DM.09G018670	Soltu.DM.07G028050	-0.86319	5.67282e-08	1.14364e-07
Soltu.DM.09G018670	Soltu.DM.11G022960	0.954449	4.88641e-13	7.85984e-12
Soltu.DM.09G018670	Soltu.DM.04G019240	-0.840235	2.79279e-07	4.70278e-07
Soltu.DM.09G018670	Soltu.DM.02G023720	-0.868905	3.64766e-08	8.04625e-08
Soltu.DM.09G018670	Soltu.DM.03G024640	0.900698	2.00296e-09	7.4593e-09
Soltu.DM.09G018670	Soltu.DM.07G018240	0.782993	6.09666e-06	7.89226e-06
Soltu.DM.09G018670	Soltu.DM.04G030580	0.815818	1.18312e-06	1.77822e-06
Soltu.DM.09G018670	Soltu.DM.01G035890	-0.896178	3.19837e-09	1.08429e-08
Soltu.DM.09G018670	Soltu.DM.07G025330	0.930902	4.28151e-11	3.30288e-10
Soltu.DM.10G021030	Soltu.DM.01G031430	0.886755	7.94842e-09	2.25056e-08
Soltu.DM.10G021030	Soltu.DM.10G001920	0.79261	3.88671e-06	5.18227e-06
Soltu.DM.10G021030	Soltu.DM.12G003910	0.897857	2.69484e-09	9.5201e-09
Soltu.DM.10G021030	Soltu.DM.07G028050	-0.90819	8.75992e-10	3.67916e-09
Soltu.DM.10G021030	Soltu.DM.11G022960	0.977342	2.50761e-16	2.10639e-14
Soltu.DM.10G021030	Soltu.DM.04G019240	-0.798191	2.96089e-06	4.08474e-06
Soltu.DM.10G021030	Soltu.DM.02G023720	-0.875406	2.15144e-08	5.26371e-08
Soltu.DM.10G021030	Soltu.DM.03G024640	0.955203	4.08138e-13	6.85671e-12
Soltu.DM.10G021030	Soltu.DM.07G018240	0.751948	2.26618e-05	2.75439e-05
Soltu.DM.10G021030	Soltu.DM.04G030580	0.799033	2.83981e-06	3.93926e-06
Soltu.DM.10G021030	Soltu.DM.01G035890	-0.923924	1.19378e-10	7.52083e-10
Soltu.DM.10G021030	Soltu.DM.07G025330	0.952754	7.24625e-13	1.07415e-11
Soltu.DM.08G029500	Soltu.DM.01G031430	0.856543	9.25501e-08	1.7276e-07
Soltu.DM.08G029500	Soltu.DM.10G001920	0.797077	3.12828e-06	4.29997e-06
Soltu.DM.08G029500	Soltu.DM.12G003910	0.853231	1.17056e-07	2.12217e-07
Soltu.DM.08G029500	Soltu.DM.07G028050	-0.930252	4.73159e-11	3.57708e-10
Soltu.DM.08G029500	Soltu.DM.11G022960	0.977863	1.94632e-16	1.83927e-14
Soltu.DM.08G029500	Soltu.DM.04G019240	-0.811188	1.51918e-06	2.23444e-06
Soltu.DM.08G029500	Soltu.DM.02G023720	-0.869986	3.34782e-08	7.5777e-08
Soltu.DM.08G029500	Soltu.DM.03G024640	0.891195	5.22979e-09	1.61377e-08
Soltu.DM.08G029500	Soltu.DM.07G018240	0.735164	4.27169e-05	5.01459e-05
Soltu.DM.08G029500	Soltu.DM.04G030580	0.804705	2.13223e-06	3.04145e-06
Soltu.DM.08G029500	Soltu.DM.01G035890	-0.931925	3.65155e-11	2.93678e-10
Soltu.DM.08G029500	Soltu.DM.07G025330	0.962312	6.30475e-14	1.64358e-12
Soltu.DM.02G032850	Soltu.DM.01G031430	0.926575	8.18321e-11	5.6241e-10
Soltu.DM.02G032850	Soltu.DM.10G001920	0.82129	8.7243e-07	1.32708e-06
Soltu.DM.02G032850	Soltu.DM.12G003910	0.92513	1.00707e-10	6.67847e-10
Soltu.DM.02G032850	Soltu.DM.07G028050	-0.856286	9.42753e-08	1.75547e-07
Soltu.DM.02G032850	Soltu.DM.11G022960	0.959573	1.34689e-13	2.54563e-12
Soltu.DM.02G032850	Soltu.DM.04G019240	-0.790744	4.2492e-06	5.61608e-06
Soltu.DM.02G032850	Soltu.DM.02G023720	-0.873339	2.55267e-08	6.0119e-08
Soltu.DM.02G032850	Soltu.DM.03G024640	0.939321	1.06706e-11	1.09013e-10
Soltu.DM.02G032850	Soltu.DM.07G018240	0.817364	1.08668e-06	1.63978e-06
Soltu.DM.02G032850	Soltu.DM.04G030580	0.802425	2.39521e-06	3.36575e-06
Soltu.DM.02G032850	Soltu.DM.01G035890	-0.87629	1.99791e-08	4.93601e-08
Soltu.DM.02G032850	Soltu.DM.07G025330	0.921865	1.58586e-10	9.36648e-10
Soltu.DM.09G018680	Soltu.DM.01G031430	0.872691	2.69155e-08	6.28029e-08
Soltu.DM.09G018680	Soltu.DM.10G001920	0.827301	6.16923e-07	9.61637e-07
Soltu.DM.09G018680	Soltu.DM.12G003910	0.861477	6.45093e-08	1.27865e-07
Soltu.DM.09G018680	Soltu.DM.07G028050	-0.921439	1.68019e-10	9.66436e-10
Soltu.DM.09G018680	Soltu.DM.11G022960	0.971898	2.61141e-15	1.22052e-13
Soltu.DM.09G018680	Soltu.DM.04G019240	-0.825452	6.8725e-07	1.06033e-06
Soltu.DM.09G018680	Soltu.DM.02G023720	-0.874173	2.3833e-08	5.69138e-08
Soltu.DM.09G018680	Soltu.DM.03G024640	0.886767	7.93977e-09	2.25056e-08
Soltu.DM.09G018680	Soltu.DM.07G018240	0.740974	3.44861e-05	4.09929e-05
Soltu.DM.09G018680	Soltu.DM.04G030580	0.82459	7.22436e-07	1.10783e-06
Soltu.DM.09G018680	Soltu.DM.01G035890	-0.941947	6.63963e-12	7.60539e-11
Soltu.DM.09G018680	Soltu.DM.07G025330	0.959942	1.21978e-13	2.4923e-12
Soltu.DM.10G013380	Soltu.DM.01G031430	0.898802	2.44402e-09	8.84057e-09
Soltu.DM.10G013380	Soltu.DM.10G001920	0.795398	3.39626e-06	4.61794e-06
Soltu.DM.10G013380	Soltu.DM.12G003910	0.883493	1.06932e-08	2.89751e-08
Soltu.DM.10G013380	Soltu.DM.07G028050	-0.914336	4.20895e-10	1.97638e-09
Soltu.DM.10G013380	Soltu.DM.11G022960	0.97146	3.0896e-15	1.29763e-13
Soltu.DM.10G013380	Soltu.DM.04G019240	-0.800305	2.66515e-06	3.71744e-06
Soltu.DM.10G013380	Soltu.DM.02G023720	-0.886002	8.51822e-09	2.3851e-08
Soltu.DM.10G013380	Soltu.DM.03G024640	0.940801	8.18822e-12	9.10337e-11
Soltu.DM.10G013380	Soltu.DM.07G018240	0.739684	3.6181e-05	4.28728e-05
Soltu.DM.10G013380	Soltu.DM.04G030580	0.808412	1.75925e-06	2.54788e-06
Soltu.DM.10G013380	Soltu.DM.01G035890	-0.924811	1.05366e-10	6.80824e-10
Soltu.DM.10G013380	Soltu.DM.07G025330	0.961641	7.63256e-14	1.74855e-12
Soltu.DM.10G020720	Soltu.DM.01G031430	-0.894089	3.94228e-09	1.30718e-08
Soltu.DM.10G020720	Soltu.DM.10G001920	-0.782271	6.3006e-06	8.12842e-06
Soltu.DM.10G020720	Soltu.DM.12G003910	-0.871813	2.89062e-08	6.68289e-08
Soltu.DM.10G020720	Soltu.DM.07G028050	0.889329	6.24891e-09	1.85991e-08
Soltu.DM.10G020720	Soltu.DM.11G022960	-0.974496	9.09387e-16	5.72914e-14
Soltu.DM.10G020720	Soltu.DM.04G019240	0.804201	2.18803e-06	3.09767e-06
Soltu.DM.10G020720	Soltu.DM.02G023720	0.877129	1.86141e-08	4.64431e-08
Soltu.DM.10G020720	Soltu.DM.03G024640	-0.911212	6.14946e-10	2.7347e-09
Soltu.DM.10G020720	Soltu.DM.07G018240	-0.74934	2.50881e-05	3.03465e-05
Soltu.DM.10G020720	Soltu.DM.04G030580	-0.779134	7.25812e-06	9.30024e-06
Soltu.DM.10G020720	Soltu.DM.01G035890	0.887373	7.50626e-09	2.15769e-08
Soltu.DM.10G020720	Soltu.DM.07G025330	-0.953261	6.45098e-13	1.01603e-11
Soltu.DM.03G010900	Soltu.DM.01G031430	0.853028	1.18733e-07	2.14742e-07
Soltu.DM.03G010900	Soltu.DM.10G001920	0.749079	2.53423e-05	3.0605e-05
Soltu.DM.03G010900	Soltu.DM.12G003910	0.828465	5.75977e-07	9.05278e-07
Soltu.DM.03G010900	Soltu.DM.07G028050	-0.915493	3.64418e-10	1.78896e-09
Soltu.DM.03G010900	Soltu.DM.11G022960	0.96141	8.14399e-14	1.81084e-12
Soltu.DM.03G010900	Soltu.DM.04G019240	-0.785516	5.4294e-06	7.10143e-06
Soltu.DM.03G010900	Soltu.DM.02G023720	-0.853814	1.12359e-07	2.04683e-07
Soltu.DM.03G010900	Soltu.DM.03G024640	0.930077	4.85964e-11	3.58538e-10
Soltu.DM.03G010900	Soltu.DM.07G018240	0.76409	1.38822e-05	1.71486e-05
Soltu.DM.03G010900	Soltu.DM.04G030580	0.783844	5.86401e-06	7.61717e-06
Soltu.DM.03G010900	Soltu.DM.01G035890	-0.925027	1.02187e-10	6.71768e-10
Soltu.DM.03G010900	Soltu.DM.07G025330	0.95447	4.86224e-13	7.85984e-12
Soltu.DM.12G022950	Soltu.DM.01G031430	0.867489	4.0773e-08	8.75692e-08
Soltu.DM.12G022950	Soltu.DM.10G001920	0.813275	1.35839e-06	2.02155e-06
Soltu.DM.12G022950	Soltu.DM.12G003910	0.859896	7.25267e-08	1.39517e-07
Soltu.DM.12G022950	Soltu.DM.07G028050	-0.930174	4.78877e-11	3.58446e-10
Soltu.DM.12G022950	Soltu.DM.11G022960	0.981105	3.46142e-17	4.8112e-15
Soltu.DM.12G022950	Soltu.DM.04G019240	-0.793983	3.63778e-06	4.90225e-06
Soltu.DM.12G022950	Soltu.DM.02G023720	-0.865613	4.71604e-08	9.79305e-08
Soltu.DM.12G022950	Soltu.DM.03G024640	0.886668	8.01221e-09	2.26016e-08
Soltu.DM.12G022950	Soltu.DM.07G018240	0.736769	4.02867e-05	4.74643e-05
Soltu.DM.12G022950	Soltu.DM.04G030580	0.794445	3.55732e-06	4.81097e-06
Soltu.DM.12G022950	Soltu.DM.01G035890	-0.93405	2.60193e-11	2.2353e-10
Soltu.DM.12G022950	Soltu.DM.07G025330	0.971946	2.56369e-15	1.22052e-13
Soltu.DM.09G027020	Soltu.DM.01G031430	0.868689	3.71064e-08	8.13114e-08
Soltu.DM.09G027020	Soltu.DM.10G001920	0.764235	1.37992e-05	1.7074e-05
Soltu.DM.09G027020	Soltu.DM.12G003910	0.830774	5.01928e-07	7.95509e-07
Soltu.DM.09G027020	Soltu.DM.07G028050	-0.886413	8.2032e-09	2.30543e-08
Soltu.DM.09G027020	Soltu.DM.11G022960	0.959577	1.34543e-13	2.54563e-12
Soltu.DM.09G027020	Soltu.DM.04G019240	-0.793271	3.76501e-06	5.04671e-06
Soltu.DM.09G027020	Soltu.DM.02G023720	-0.883745	1.04538e-08	2.84284e-08
Soltu.DM.09G027020	Soltu.DM.03G024640	0.948905	1.68442e-12	2.31532e-11
Soltu.DM.09G027020	Soltu.DM.07G018240	0.737079	3.98316e-05	4.70511e-05
Soltu.DM.09G027020	Soltu.DM.04G030580	0.769531	1.10412e-05	1.38426e-05
Soltu.DM.09G027020	Soltu.DM.01G035890	-0.881965	1.22507e-08	3.2611e-08
Soltu.DM.09G027020	Soltu.DM.07G025330	0.943924	4.57839e-12	5.49407e-11
Soltu.DM.10G005780	Soltu.DM.01G031430	0.892763	4.49146e-09	1.42691e-08
Soltu.DM.10G005780	Soltu.DM.10G001920	0.83395	4.13938e-07	6.71539e-07
Soltu.DM.10G005780	Soltu.DM.12G003910	0.887834	7.19116e-09	2.08296e-08
Soltu.DM.10G005780	Soltu.DM.07G028050	-0.900176	2.1165e-09	7.76735e-09
Soltu.DM.10G005780	Soltu.DM.11G022960	0.959682	1.30818e-13	2.54563e-12
Soltu.DM.10G005780	Soltu.DM.04G019240	-0.832292	4.57965e-07	7.36642e-07
Soltu.DM.10G005780	Soltu.DM.02G023720	-0.866977	4.24319e-08	8.90428e-08
Soltu.DM.10G005780	Soltu.DM.03G024640	0.897205	2.88124e-09	1.00379e-08
Soltu.DM.10G005780	Soltu.DM.07G018240	0.773337	9.37221e-06	1.18485e-05
Soltu.DM.10G005780	Soltu.DM.04G030580	0.854879	1.04216e-07	1.91696e-07
Soltu.DM.10G005780	Soltu.DM.01G035890	-0.944373	4.19931e-12	5.30623e-11
Soltu.DM.10G005780	Soltu.DM.07G025330	0.944056	4.46353e-12	5.44263e-11
Soltu.DM.03G021590	Soltu.DM.01G031430	0.9135	4.6651e-10	2.13747e-09
Soltu.DM.03G021590	Soltu.DM.10G001920	0.81196	1.4579e-06	2.15267e-06
Soltu.DM.03G021590	Soltu.DM.12G003910	0.87979	1.48186e-08	3.8366e-08
Soltu.DM.03G021590	Soltu.DM.07G028050	-0.90531	1.21362e-09	4.80363e-09
Soltu.DM.03G021590	Soltu.DM.11G022960	0.969121	7.2712e-15	2.49865e-13
Soltu.DM.03G021590	Soltu.DM.04G019240	-0.770882	1.0421e-05	1.31086e-05
Soltu.DM.03G021590	Soltu.DM.02G023720	-0.892555	4.58375e-09	1.44388e-08
Soltu.DM.03G021590	Soltu.DM.03G024640	0.932584	3.29099e-11	2.73406e-10
Soltu.DM.03G021590	Soltu.DM.07G018240	0.759144	1.70077e-05	2.08393e-05
Soltu.DM.03G021590	Soltu.DM.04G030580	0.814357	1.2812e-06	1.91421e-06
Soltu.DM.03G021590	Soltu.DM.01G035890	-0.91088	6.39689e-10	2.81166e-09
Soltu.DM.03G021590	Soltu.DM.07G025330	0.957734	2.17851e-13	3.92132e-12
Soltu.DM.10G015630	Soltu.DM.01G031430	0.878969	1.59086e-08	4.07548e-08
Soltu.DM.10G015630	Soltu.DM.10G001920	0.767586	1.19914e-05	1.4935e-05
Soltu.DM.10G015630	Soltu.DM.12G003910	0.843961	2.1941e-07	3.79574e-07
Soltu.DM.10G015630	Soltu.DM.07G028050	-0.931602	3.84092e-11	3.02473e-10
Soltu.DM.10G015630	Soltu.DM.11G022960	0.980934	3.81841e-17	4.8112e-15
Soltu.DM.10G015630	Soltu.DM.04G019240	-0.780631	6.78629e-06	8.74009e-06
Soltu.DM.10G015630	Soltu.DM.02G023720	-0.866806	4.30006e-08	8.98024e-08
Soltu.DM.10G015630	Soltu.DM.03G024640	0.914552	4.09777e-10	1.94837e-09
Soltu.DM.10G015630	Soltu.DM.07G018240	0.722074	6.78642e-05	7.91749e-05
Soltu.DM.10G015630	Soltu.DM.04G030580	0.768246	1.16613e-05	1.45477e-05
Soltu.DM.10G015630	Soltu.DM.01G035890	-0.907053	9.97543e-10	4.0986e-09
Soltu.DM.10G015630	Soltu.DM.07G025330	0.978813	1.2064e-16	1.30291e-14
Soltu.DM.02G031390	Soltu.DM.01G031430	0.861097	6.63596e-08	1.29633e-07
Soltu.DM.02G031390	Soltu.DM.10G001920	0.791332	4.13177e-06	5.47043e-06
Soltu.DM.02G031390	Soltu.DM.12G003910	0.833473	4.26193e-07	6.88466e-07
Soltu.DM.02G031390	Soltu.DM.07G028050	-0.861336	6.51916e-08	1.28681e-07
Soltu.DM.02G031390	Soltu.DM.11G022960	0.946495	2.76522e-12	3.73304e-11
Soltu.DM.02G031390	Soltu.DM.04G019240	-0.814884	1.24502e-06	1.86753e-06
Soltu.DM.02G031390	Soltu.DM.02G023720	-0.867193	4.17241e-08	8.86248e-08
Soltu.DM.02G031390	Soltu.DM.03G024640	0.905322	1.21188e-09	4.80363e-09
Soltu.DM.02G031390	Soltu.DM.07G018240	0.774823	8.78394e-06	1.11984e-05
Soltu.DM.02G031390	Soltu.DM.04G030580	0.757107	1.84655e-05	2.25888e-05
Soltu.DM.02G031390	Soltu.DM.01G035890	-0.893264	4.27625e-09	1.38156e-08
Soltu.DM.02G031390	Soltu.DM.07G025330	0.926122	8.73675e-11	5.89731e-10
Soltu.DM.10G003480	Soltu.DM.01G031430	0.873076	2.60831e-08	6.10672e-08
Soltu.DM.10G003480	Soltu.DM.10G001920	0.82687	6.32725e-07	9.84238e-07
Soltu.DM.10G003480	Soltu.DM.12G003910	0.905231	1.22433e-09	4.82081e-09
Soltu.DM.10G003480	Soltu.DM.07G028050	-0.847533	1.73075e-07	3.03584e-07
Soltu.DM.10G003480	Soltu.DM.11G022960	0.940141	9.22293e-12	9.96077e-11
Soltu.DM.10G003480	Soltu.DM.04G019240	-0.820217	9.26881e-07	1.40425e-06
Soltu.DM.10G003480	Soltu.DM.02G023720	-0.861558	6.41243e-08	1.27574e-07
Soltu.DM.10G003480	Soltu.DM.03G024640	0.916143	3.35776e-10	1.71518e-09
Soltu.DM.10G003480	Soltu.DM.07G018240	0.795094	3.44695e-06	4.67844e-06
Soltu.DM.10G003480	Soltu.DM.04G030580	0.799064	2.83541e-06	3.93926e-06
Soltu.DM.10G003480	Soltu.DM.01G035890	-0.893827	4.04555e-09	1.33041e-08
Soltu.DM.10G003480	Soltu.DM.07G025330	0.88871	6.62492e-09	1.94881e-08
Soltu.DM.12G002080	Soltu.DM.01G031430	0.864928	4.97051e-08	1.01835e-07
Soltu.DM.12G002080	Soltu.DM.10G001920	0.736528	4.06439e-05	4.77866e-05
Soltu.DM.12G002080	Soltu.DM.12G003910	0.827843	5.97552e-07	9.33366e-07
Soltu.DM.12G002080	Soltu.DM.07G028050	-0.884048	1.01734e-08	2.77657e-08
Soltu.DM.12G002080	Soltu.DM.11G022960	0.956516	2.96065e-13	5.20524e-12
Soltu.DM.12G002080	Soltu.DM.04G019240	-0.785365	5.46741e-06	7.13199e-06
Soltu.DM.12G002080	Soltu.DM.02G023720	-0.878933	1.59569e-08	4.07548e-08
Soltu.DM.12G002080	Soltu.DM.03G024640	0.923062	1.34562e-10	8.07372e-10
Soltu.DM.12G002080	Soltu.DM.07G018240	0.756378	1.90134e-05	2.31841e-05
Soltu.DM.12G002080	Soltu.DM.04G030580	0.744827	2.98292e-05	3.56817e-05
Soltu.DM.12G002080	Soltu.DM.01G035890	-0.879364	1.53749e-08	3.96705e-08
Soltu.DM.12G002080	Soltu.DM.07G025330	0.937942	1.35727e-11	1.29886e-10
Soltu.DM.02G008740	Soltu.DM.01G031430	0.890204	5.75072e-09	1.73902e-08
Soltu.DM.02G008740	Soltu.DM.10G001920	0.824792	7.14068e-07	1.09723e-06
Soltu.DM.02G008740	Soltu.DM.12G003910	0.872512	2.73109e-08	6.35293e-08
Soltu.DM.02G008740	Soltu.DM.07G028050	-0.901402	1.85854e-09	7.02529e-09
Soltu.DM.02G008740	Soltu.DM.11G022960	0.97177	2.74454e-15	1.22052e-13
Soltu.DM.02G008740	Soltu.DM.04G019240	-0.813804	1.32014e-06	1.96849e-06
Soltu.DM.02G008740	Soltu.DM.02G023720	-0.856123	9.53833e-08	1.77174e-07
Soltu.DM.02G008740	Soltu.DM.03G024640	0.889822	5.96354e-09	1.78906e-08
Soltu.DM.02G008740	Soltu.DM.07G018240	0.765087	1.33179e-05	1.65054e-05
Soltu.DM.02G008740	Soltu.DM.04G030580	0.794684	3.51636e-06	4.7641e-06
Soltu.DM.02G008740	Soltu.DM.01G035890	-0.911317	6.07299e-10	2.71668e-09
Soltu.DM.02G008740	Soltu.DM.07G025330	0.958963	1.58342e-13	2.91967e-12
Soltu.DM.08G029600	Soltu.DM.01G031430	0.861889	6.25569e-08	1.24784e-07
Soltu.DM.08G029600	Soltu.DM.10G001920	0.790646	4.26904e-06	5.63246e-06
Soltu.DM.08G029600	Soltu.DM.12G003910	0.849802	1.48399e-07	2.64598e-07
Soltu.DM.08G029600	Soltu.DM.07G028050	-0.838207	3.17665e-07	5.26655e-07
Soltu.DM.08G029600	Soltu.DM.11G022960	0.929265	5.49718e-11	3.99603e-10
Soltu.DM.08G029600	Soltu.DM.04G019240	-0.842279	2.4484e-07	4.18776e-07
Soltu.DM.08G029600	Soltu.DM.02G023720	-0.879936	1.46321e-08	3.80134e-08
Soltu.DM.08G029600	Soltu.DM.03G024640	0.896271	3.16847e-09	1.07899e-08
Soltu.DM.08G029600	Soltu.DM.07G018240	0.768766	1.14067e-05	1.4274e-05
Soltu.DM.08G029600	Soltu.DM.04G030580	0.773378	9.35569e-06	1.18474e-05
Soltu.DM.08G029600	Soltu.DM.01G035890	-0.867586	4.04628e-08	8.71506e-08
Soltu.DM.08G029600	Soltu.DM.07G025330	0.890514	5.58315e-09	1.70196e-08
