# Supplementary material for: Transcriptome-metabolome integration reveals MYB/WRKY-RGA network and phenylalanine metabolism in potato late blight resistance
Source: Research Square preprint supplement (doi:10.21203/rs.3.rs-8142072/v1), 2025-12-04
Supplement: Supplementary file 4 [file 83dca3295e6737c95a23b2c3.xlsx]

## Sheet: Sheet1
Supplementary Table S2 RGA and its types in the genome of S. tuberosum
Gene ID	RGA type
Soltu.DM.06G001240	NBS
Soltu.DM.05G024260	NBS
Soltu.DM.06G000810	NBS
Soltu.DM.10G028590	NBS
Soltu.DM.10G017120	NBS
Soltu.DM.10G028720	NBS
Soltu.DM.05G024320	NBS
Soltu.DM.05G024270	NBS
Soltu.DM.06G001350	NBS
Soltu.DM.06G016200	NBS
Soltu.DM.07G005840	NBS
Soltu.DM.11G007180	NBS
Soltu.DM.12G023500	NBS
Soltu.DM.06G005460	NBS
Soltu.DM.05G024310	NBS
Soltu.DM.05G024240	NBS
Soltu.DM.04G012360	NBS
Soltu.DM.04G032450	NBS
Soltu.DM.04G001630	NBS
Soltu.DM.10G022260	NBS
Soltu.DM.06G000930	NBS
Soltu.DM.10G028790	NBS
Soltu.DM.06G001320	NBS
Soltu.DM.S000300	NBS
Soltu.DM.01G010530	NBS
Soltu.DM.05G024200	NBS
Soltu.DM.06G000870	NBS
Soltu.DM.04G005320	NBS
Soltu.DM.04G003630	NBS
Soltu.DM.04G008130	NBS
Soltu.DM.04G001520	NBS
Soltu.DM.06G004990	NBS
Soltu.DM.10G030080	NBS
Soltu.DM.06G001340	NBS
Soltu.DM.04G018390	NBS
Soltu.DM.09G029540	NBS
Soltu.DM.05G014610	NBS
Soltu.DM.06G000900	NBS
Soltu.DM.05G024370	NBS
Soltu.DM.S000310	NBS
Soltu.DM.05G004890	NBS
Soltu.DM.06G001290	NBS
Soltu.DM.05G024330	NBS
Soltu.DM.09G029550	NBS
Soltu.DM.10G028930	NBS
Soltu.DM.09G029500	NBS
Soltu.DM.10G028600	NBS
Soltu.DM.10G021850	NBS
Soltu.DM.04G003650	NBS
Soltu.DM.09G029720	NBS
Soltu.DM.09G029510	NBS
Soltu.DM.08G020560	NBS
Soltu.DM.08G015940	NBS
Soltu.DM.08G000710	NBS
Soltu.DM.S000330	NBS
Soltu.DM.11G007350	NBS
Soltu.DM.11G024990	NBS
Soltu.DM.04G001490	NBS
Soltu.DM.12G026550	NBS
Soltu.DM.10G022280	NBS
Soltu.DM.10G022240	NBS
Soltu.DM.10G022320	NBS
Soltu.DM.05G009140	NBS
Soltu.DM.10G028620	NBS
Soltu.DM.05G002770	NBS
Soltu.DM.08G018710	NBS
Soltu.DM.10G028520	NBS
Soltu.DM.05G004860	NBS
Soltu.DM.10G028850	NBS
Soltu.DM.10G016590	NBS
Soltu.DM.08G000720	NBS
Soltu.DM.06G000960	NBS
Soltu.DM.10G028800	NBS
Soltu.DM.03G006470	NBS
Soltu.DM.05G009430	NBS
Soltu.DM.10G029400	NBS
Soltu.DM.10G022270	NBS
Soltu.DM.04G000760	NBS
Soltu.DM.10G020260	NBS
Soltu.DM.08G020860	NBS
Soltu.DM.08G000930	NBS
Soltu.DM.02G003290	NBS
Soltu.DM.02G013420	NBS
Soltu.DM.12G022840	NBS
Soltu.DM.11G025660	NBS
Soltu.DM.04G001530	NBS
Soltu.DM.06G022870	NBS
Soltu.DM.10G021550	NBS
Soltu.DM.01G000440	NBS
Soltu.DM.05G004870	NBS
Soltu.DM.10G006190	NBS
Soltu.DM.04G008240	NBS
Soltu.DM.09G029570	NBS
Soltu.DM.05G006210	NBS
Soltu.DM.06G011640	NBS
Soltu.DM.10G021580	NBS
Soltu.DM.10G021540	NBS
Soltu.DM.08G020590	NBS
Soltu.DM.10G021680	NBS
Soltu.DM.10G028530	NBS
Soltu.DM.09G029530	NBS
Soltu.DM.01G001020	NBS
Soltu.DM.09G010360	NBS
Soltu.DM.10G022330	NBS
Soltu.DM.02G013750	NBS
Soltu.DM.08G000730	NBS
Soltu.DM.12G023380	NBS
Soltu.DM.04G001460	NBS
Soltu.DM.04G020580	NBS
Soltu.DM.11G007330	NBS
Soltu.DM.08G003460	NBS
Soltu.DM.04G003570	NBS
Soltu.DM.08G000870	NBS
Soltu.DM.12G004780	NBS
Soltu.DM.12G004740	NBS
Soltu.DM.01G031100	NBS
Soltu.DM.04G001470	NBS
Soltu.DM.09G029560	NBS
Soltu.DM.05G005810	NBS
Soltu.DM.11G007190	NBS
Soltu.DM.10G016640	NBS
Soltu.DM.11G007100	NBS
Soltu.DM.04G010710	NBS
Soltu.DM.09G031090	NBS
Soltu.DM.12G002410	NBS
Soltu.DM.01G001120	NBS
Soltu.DM.04G001440	NBS
Soltu.DM.04G001480	NBS
Soltu.DM.01G000420	NBS
Soltu.DM.05G002790	NBS
Soltu.DM.07G014890	NBS
Soltu.DM.08G000910	NBS
Soltu.DM.07G000820	NBS
Soltu.DM.11G007340	NBS
Soltu.DM.04G032470	NBS
Soltu.DM.03G002510	NBS
Soltu.DM.12G026540	NBS
Soltu.DM.10G022090	NBS
Soltu.DM.07G018470	NBS
Soltu.DM.10G012850	NBS
Soltu.DM.11G007410	NBS
Soltu.DM.04G000750	NBS
Soltu.DM.10G021570	NBS
Soltu.DM.08G020790	NBS
Soltu.DM.08G003440	NBS
Soltu.DM.11G007200	NBS
Soltu.DM.10G029460	NBS
Soltu.DM.01G027440	NBS
Soltu.DM.12G004760	NBS
Soltu.DM.01G031090	NBS
Soltu.DM.10G029420	NBS
Soltu.DM.06G021050	NBS
Soltu.DM.09G031300	NBS
Soltu.DM.01G000430	NBS
Soltu.DM.04G005400	NBS
Soltu.DM.04G005340	NBS
Soltu.DM.10G029360	NBS
Soltu.DM.02G003990	NBS
Soltu.DM.12G028200	NBS
Soltu.DM.04G005760	NBS
Soltu.DM.06G020900	NBS
Soltu.DM.06G020990	NBS
Soltu.DM.04G001680	NBS
Soltu.DM.06G000940	NBS
Soltu.DM.11G007040	NBS
Soltu.DM.06G001310	NBS
Soltu.DM.06G021010	NBS
Soltu.DM.10G028610	NBS
Soltu.DM.04G005540	NBS
Soltu.DM.04G013270	NBS
Soltu.DM.09G031280	NBS
Soltu.DM.11G007390	NBS
Soltu.DM.07G014880	NBS
Soltu.DM.04G001830	NBS
Soltu.DM.04G006460	NBS
Soltu.DM.04G008150	NBS
Soltu.DM.04G010210	NBS
Soltu.DM.05G018400	NBS
Soltu.DM.04G005730	NBS
Soltu.DM.05G002630	NBS
Soltu.DM.10G028480	NBS
Soltu.DM.09G018610	NBS
Soltu.DM.04G005410	NBS
Soltu.DM.06G000800	NBS
Soltu.DM.06G010720	NBS
Soltu.DM.04G003590	NBS
Soltu.DM.07G014560	NBS
Soltu.DM.06G020840	NBS
Soltu.DM.05G007450	NBS
Soltu.DM.09G031160	NBS
Soltu.DM.09G015040	NBS
Soltu.DM.04G008210	NBS
Soltu.DM.04G006310	NBS
Soltu.DM.05G002640	NBS
Soltu.DM.04G005780	NBS
Soltu.DM.04G005740	NBS
Soltu.DM.04G005570	NBS
Soltu.DM.02G004430	NBS
Soltu.DM.05G024280	NBS
Soltu.DM.04G005420	NBS
Soltu.DM.04G003700	NBS
Soltu.DM.02G013840	NBS
Soltu.DM.11G023460	NBS
Soltu.DM.06G020870	NBS
Soltu.DM.05G006820	NBS
Soltu.DM.10G028750	NBS
Soltu.DM.06G001270	NBS
Soltu.DM.04G003710	NBS
Soltu.DM.04G003520	NBS
Soltu.DM.05G024350	NBS
Soltu.DM.09G022210	NBS
Soltu.DM.09G002510	NBS
Soltu.DM.10G018200	NBS
Soltu.DM.12G021580	NBS
Soltu.DM.01G023030	NBS
Soltu.DM.09G031260	NBS
Soltu.DM.12G018590	NBS
Soltu.DM.04G004920	NBS
Soltu.DM.04G005560	NBS
Soltu.DM.04G008050	NBS
Soltu.DM.09G019090	NBS
Soltu.DM.04G005330	NBS
Soltu.DM.04G001780	NBS
Soltu.DM.05G024390	NBS
Soltu.DM.04G013130	NBS
Soltu.DM.S001830	NBS
Soltu.DM.06G005470	NBS
Soltu.DM.04G006380	NBS
Soltu.DM.04G005430	NBS
Soltu.DM.04G005520	NBS
Soltu.DM.04G005710	NBS
Soltu.DM.10G028900	NBS
Soltu.DM.12G024060	NBS
Soltu.DM.06G001360	NBS
Soltu.DM.10G021640	NBS
Soltu.DM.04G005470	NBS
Soltu.DM.04G003660	NBS
Soltu.DM.04G008040	NBS
Soltu.DM.09G022350	NBS
Soltu.DM.02G004420	NBS
Soltu.DM.09G021230	NBS
Soltu.DM.09G031370	NBS
Soltu.DM.06G000860	NBS
Soltu.DM.04G004930	NBS
Soltu.DM.10G016000	NBS
Soltu.DM.04G005460	NBS
Soltu.DM.S000580	NBS
Soltu.DM.04G008170	NBS
Soltu.DM.S000320	NBS
Soltu.DM.04G003530	NBS
Soltu.DM.01G000410	NBS
Soltu.DM.11G007370	NBS
Soltu.DM.10G030070	NBS
Soltu.DM.04G001850	NBS
Soltu.DM.06G000920	NBS
Soltu.DM.06G001370	NBS
Soltu.DM.05G018430	NBS
Soltu.DM.04G013200	NBS
Soltu.DM.06G000830	NBS
Soltu.DM.04G003680	NBS
Soltu.DM.04G003640	NBS
Soltu.DM.04G003540	NBS
Soltu.DM.04G005550	NBS
Soltu.DM.09G031250	NBS
Soltu.DM.11G003310	NBS
Soltu.DM.08G000880	NBS
Soltu.DM.09G014770	NBS
Soltu.DM.09G031120	NBS
Soltu.DM.10G020210	NBS
Soltu.DM.10G012070	NBS
Soltu.DM.11G013270	NBS
Soltu.DM.10G004040	NBS
Soltu.DM.04G008180	NBS
Soltu.DM.10G015970	NBS
Soltu.DM.12G028130	NBS
Soltu.DM.06G000880	NBS
Soltu.DM.10G028870	NBS
Soltu.DM.04G005280	NBS
Soltu.DM.09G031050	NBS
Soltu.DM.09G011370	NBS
Soltu.DM.04G005590	NBS
Soltu.DM.11G007010	NBS
Soltu.DM.06G000910	NBS
Soltu.DM.04G001510	NBS
Soltu.DM.09G031200	NBS
Soltu.DM.04G001600	NBS
Soltu.DM.06G001250	NBS
Soltu.DM.04G008030	NBS
Soltu.DM.04G005350	NBS
Soltu.DM.07G004280	NBS
Soltu.DM.11G011990	NBS
Soltu.DM.09G010000	NBS
Soltu.DM.08G018730	NBS
Soltu.DM.04G001550	NBS
Soltu.DM.09G031380	NBS
Soltu.DM.06G000950	NBS
Soltu.DM.10G015350	NBS
Soltu.DM.11G018820	NBS
Soltu.DM.12G002390	NBS
Soltu.DM.04G001860	NBS
Soltu.DM.05G006060	NBS
Soltu.DM.04G010250	NBS
Soltu.DM.11G007240	NBS
Soltu.DM.09G031390	NBS
Soltu.DM.04G006260	NBS
Soltu.DM.05G009280	NBS
Soltu.DM.04G001730	NBS
Soltu.DM.12G002440	NBS
Soltu.DM.05G008780	NBS
Soltu.DM.11G003490	NBS
Soltu.DM.06G020360	NBS
Soltu.DM.06G020950	NBS
Soltu.DM.11G023350	NBS
Soltu.DM.09G010500	NBS
Soltu.DM.11G007160	NBS
Soltu.DM.05G005400	NBS
Soltu.DM.07G017010	NBS
Soltu.DM.04G002370	NBS
Soltu.DM.01G028150	NBS
Soltu.DM.01G000470	NBS
Soltu.DM.05G002660	NBS
Soltu.DM.12G028250	NBS
Soltu.DM.01G027920	NBS
Soltu.DM.12G020290	NBS
Soltu.DM.05G009080	NBS
Soltu.DM.12G026510	NBS
Soltu.DM.10G022300	NBS
Soltu.DM.08G021730	NBS
Soltu.DM.10G016700	NBS
Soltu.DM.02G013450	NBS
Soltu.DM.01G003400	NBS
Soltu.DM.08G020910	NBS
Soltu.DM.02G013760	NBS
Soltu.DM.01G000460	NBS
Soltu.DM.10G013970	NBS
Soltu.DM.10G004050	NBS
Soltu.DM.09G011800	NBS
Soltu.DM.04G001760	NBS
Soltu.DM.04G001450	NBS
Soltu.DM.S000270	NBS
Soltu.DM.05G005410	NBS
Soltu.DM.04G008020	NBS
Soltu.DM.12G023460	NBS
Soltu.DM.01G001040	NBS
Soltu.DM.05G013030	NBS
Soltu.DM.05G009720	NBS
Soltu.DM.06G020880	NBS
Soltu.DM.08G000800	NBS
Soltu.DM.05G005680	NBS
Soltu.DM.05G005640	NBS
Soltu.DM.06G021020	NBS
Soltu.DM.05G020510	NBS
Soltu.DM.05G000210	NBS
Soltu.DM.10G013980	NBS
Soltu.DM.12G028190	NBS
Soltu.DM.05G005630	NBS
Soltu.DM.06G020830	NBS
Soltu.DM.11G004930	NBS
Soltu.DM.09G030280	NBS
Soltu.DM.11G024050	NBS
Soltu.DM.09G002500	NBS
Soltu.DM.02G003760	NBS
Soltu.DM.04G006280	NBS
Soltu.DM.05G019300	NBS
Soltu.DM.05G005740	NBS
Soltu.DM.10G029380	NBS
Soltu.DM.12G023480	NBS
Soltu.DM.12G010500	NBS
Soltu.DM.01G001060	NBS
Soltu.DM.04G005370	NBS
Soltu.DM.09G027360	NBS
Soltu.DM.05G005840	NBS
Soltu.DM.12G023510	NBS
Soltu.DM.01G000480	NBS
Soltu.DM.04G001740	NBS
Soltu.DM.04G010740	NBS
Soltu.DM.08G003520	NBS
Soltu.DM.09G019040	NBS
Soltu.DM.11G007110	NBS
Soltu.DM.04G010700	NBS
Soltu.DM.04G010270	NBS
Soltu.DM.05G002130	NBS
Soltu.DM.04G006490	NBS
Soltu.DM.12G020790	NBS
Soltu.DM.09G029420	NBS
Soltu.DM.12G023490	NBS
Soltu.DM.09G031100	NBS
Soltu.DM.01G000450	NBS
Soltu.DM.06G020820	NBS
Soltu.DM.04G006450	NBS
Soltu.DM.11G022390	NBS
Soltu.DM.11G024960	NBS
Soltu.DM.12G003390	NBS
Soltu.DM.11G007150	NBS
Soltu.DM.05G002650	NBS
Soltu.DM.05G005700	NBS
Soltu.DM.05G005790	NBS
Soltu.DM.10G004070	NBS
Soltu.DM.11G024080	NBS
Soltu.DM.08G000830	NBS
Soltu.DM.04G032480	NBS
Soltu.DM.10G004030	NBS
Soltu.DM.05G006200	NBS
Soltu.DM.06G020960	NBS
Soltu.DM.07G005060	NBS
Soltu.DM.08G000840	NBS
Soltu.DM.01G001000	NBS
Soltu.DM.11G007210	NBS
Soltu.DM.04G005310	NBS
Soltu.DM.11G007400	NBS
Soltu.DM.11G024230	NBS
Soltu.DM.04G012280	NBS
Soltu.DM.02G003140	NBS
Soltu.DM.12G028170	NBS
Soltu.DM.04G006370	NBS
Soltu.DM.04G001500	NBS
Soltu.DM.06G021040	NBS
Soltu.DM.03G000720	NBS
Soltu.DM.09G021240	NBS
Soltu.DM.05G009090	NBS
Soltu.DM.02G004770	NBS
Soltu.DM.04G010240	NBS
Soltu.DM.12G028160	NBS
Soltu.DM.06G020940	NBS
Soltu.DM.04G005300	NBS
Soltu.DM.11G010580	NBS
Soltu.DM.02G021890	NBS
Soltu.DM.04G012390	NBS
Soltu.DM.11G001680	NBS
Soltu.DM.06G022890	NBS
Soltu.DM.11G024850	NBS
Soltu.DM.09G029690	NBS
Soltu.DM.12G003400	NBS
Soltu.DM.02G004030	NBS
Soltu.DM.01G026580	NBS
Soltu.DM.01G041720	NBS
Soltu.DM.12G003430	NBS
Soltu.DM.02G029370	NBS
Soltu.DM.10G021700	NBS
Soltu.DM.04G034340	NBS
Soltu.DM.02G029390	NBS
Soltu.DM.07G018490	NBS
Soltu.DM.10G021590	NBS
Soltu.DM.10G022100	NBS
Soltu.DM.02G029410	NBS
Soltu.DM.10G021840	NBS
Soltu.DM.02G024720	NBS
Soltu.DM.10G021660	NBS
Soltu.DM.10G021560	NBS
Soltu.DM.10G021670	NBS
Soltu.DM.02G029330	NBS
Soltu.DM.10G022210	NBS
Soltu.DM.11G002030	NBS
Soltu.DM.08G028010	NBS
Soltu.DM.11G001810	NBS
Soltu.DM.11G002210	NBS
Soltu.DM.12G003230	NBS
Soltu.DM.11G001920	NBS
Soltu.DM.04G020840	NBS
Soltu.DM.11G002150	NBS
Soltu.DM.07G028010	NBS
Soltu.DM.11G002180	NBS
Soltu.DM.01G041920	NBS
Soltu.DM.06G004980	NBS
Soltu.DM.11G019760	NBS
Soltu.DM.01G041790	NBS
Soltu.DM.09G029660	NBS
Soltu.DM.11G001840	NBS
Soltu.DM.01G011420	NBS
Soltu.DM.04G002180	NBS
Soltu.DM.09G029410	NBS
Soltu.DM.01G041930	NBS
Soltu.DM.09G029650	NBS
Soltu.DM.06G018970	NBS
Soltu.DM.11G001930	NBS
Soltu.DM.01G041640	NBS
Soltu.DM.06G020330	NBS
Soltu.DM.11G002070	NBS
Soltu.DM.12G003420	NBS
Soltu.DM.11G001960	NBS
Soltu.DM.06G020370	NBS
Soltu.DM.12G003290	NBS
Soltu.DM.12G003410	NBS
Soltu.DM.06G020380	NBS
Soltu.DM.11G001980	NBS
Soltu.DM.12G003210	NBS
Soltu.DM.05G006830	NBS
Soltu.DM.02G003720	NBS
Soltu.DM.11G001910	NBS
Soltu.DM.02G018090	NBS
Soltu.DM.11G001880	NBS
Soltu.DM.07G024560	NBS
Soltu.DM.06G020350	NBS
Soltu.DM.01G029900	NBS
Soltu.DM.11G001830	NBS
Soltu.DM.06G020430	NBS
Soltu.DM.09G005920	NBS
Soltu.DM.05G006840	NBS
Soltu.DM.01G000100	RLK
Soltu.DM.01G002090	RLK
Soltu.DM.01G002110	RLK
Soltu.DM.01G002130	RLK
Soltu.DM.01G002930	RLK
Soltu.DM.01G003430	RLK
Soltu.DM.01G003440	RLK
Soltu.DM.01G003450	RLK
Soltu.DM.01G003460	RLK
Soltu.DM.01G003470	RLK
Soltu.DM.01G003480	RLK
Soltu.DM.01G003490	RLK
Soltu.DM.01G003500	RLK
Soltu.DM.01G003510	RLK
Soltu.DM.01G003670	RLK
Soltu.DM.01G004690	RLK
Soltu.DM.01G004730	RLK
Soltu.DM.01G004740	RLK
Soltu.DM.01G004780	RLK
Soltu.DM.01G004790	RLK
Soltu.DM.01G004820	RLK
Soltu.DM.01G004830	RLK
Soltu.DM.01G004860	RLK
Soltu.DM.01G004920	RLK
Soltu.DM.01G004930	RLK
Soltu.DM.01G004940	RLK
Soltu.DM.01G004970	RLK
Soltu.DM.01G005070	RLK
Soltu.DM.01G005080	RLK
Soltu.DM.01G005550	RLK
Soltu.DM.01G005660	RLK
Soltu.DM.01G007770	RLK
Soltu.DM.01G011140	RLK
Soltu.DM.01G013710	RLK
Soltu.DM.01G019090	RLK
Soltu.DM.01G019750	RLK
Soltu.DM.01G022000	RLK
Soltu.DM.01G022310	RLK
Soltu.DM.01G022390	RLK
Soltu.DM.01G023180	RLK
Soltu.DM.01G025010	RLK
Soltu.DM.01G026030	RLK
Soltu.DM.01G031880	RLK
Soltu.DM.01G032810	RLK
Soltu.DM.01G033890	RLK
Soltu.DM.01G034010	RLK
Soltu.DM.01G034920	RLK
Soltu.DM.01G034930	RLK
Soltu.DM.01G034940	RLK
Soltu.DM.01G034950	RLK
Soltu.DM.01G034960	RLK
Soltu.DM.01G035290	RLK
Soltu.DM.01G035990	RLK
Soltu.DM.01G036120	RLK
Soltu.DM.01G038310	RLK
Soltu.DM.01G040860	RLK
Soltu.DM.01G041460	RLK
Soltu.DM.01G041480	RLK
Soltu.DM.01G041510	RLK
Soltu.DM.01G041520	RLK
Soltu.DM.01G042460	RLK
Soltu.DM.01G042970	RLK
Soltu.DM.01G044200	RLK
Soltu.DM.01G044310	RLK
Soltu.DM.01G045490	RLK
Soltu.DM.01G045800	RLK
Soltu.DM.01G047000	RLK
Soltu.DM.01G047420	RLK
Soltu.DM.01G048540	RLK
Soltu.DM.01G049310	RLK
Soltu.DM.01G049370	RLK
Soltu.DM.01G049430	RLK
Soltu.DM.01G049810	RLK
Soltu.DM.02G000280	RLK
Soltu.DM.02G001170	RLK
Soltu.DM.02G001220	RLK
Soltu.DM.02G001680	RLK
Soltu.DM.02G001690	RLK
Soltu.DM.02G002430	RLK
Soltu.DM.02G002890	RLK
Soltu.DM.02G005280	RLK
Soltu.DM.02G006620	RLK
Soltu.DM.02G007100	RLK
Soltu.DM.02G008870	RLK
Soltu.DM.02G010060	RLK
Soltu.DM.02G010450	RLK
Soltu.DM.02G010760	RLK
Soltu.DM.02G011090	RLK
Soltu.DM.02G011150	RLK
Soltu.DM.02G011520	RLK
Soltu.DM.02G011720	RLK
Soltu.DM.02G011770	RLK
Soltu.DM.02G011780	RLK
Soltu.DM.02G011800	RLK
Soltu.DM.02G012970	RLK
Soltu.DM.02G012990	RLK
Soltu.DM.02G013960	RLK
Soltu.DM.02G013980	RLK
Soltu.DM.02G014720	RLK
Soltu.DM.02G014860	RLK
Soltu.DM.02G014900	RLK
Soltu.DM.02G014910	RLK
Soltu.DM.02G014940	RLK
Soltu.DM.02G014950	RLK
Soltu.DM.02G014980	RLK
Soltu.DM.02G015010	RLK
Soltu.DM.02G015020	RLK
Soltu.DM.02G015030	RLK
Soltu.DM.02G015220	RLK
Soltu.DM.02G015490	RLK
Soltu.DM.02G015550	RLK
Soltu.DM.02G015580	RLK
Soltu.DM.02G015640	RLK
Soltu.DM.02G015670	RLK
Soltu.DM.02G015680	RLK
Soltu.DM.02G015700	RLK
Soltu.DM.02G015740	RLK
Soltu.DM.02G015750	RLK
Soltu.DM.02G015770	RLK
Soltu.DM.02G015840	RLK
Soltu.DM.02G015950	RLK
Soltu.DM.02G017020	RLK
Soltu.DM.02G017590	RLK
Soltu.DM.02G018140	RLK
Soltu.DM.02G018160	RLK
Soltu.DM.02G019090	RLK
Soltu.DM.02G019100	RLK
Soltu.DM.02G019120	RLK
Soltu.DM.02G019130	RLK
Soltu.DM.02G019150	RLK
Soltu.DM.02G019170	RLK
Soltu.DM.02G019190	RLK
Soltu.DM.02G019230	RLK
Soltu.DM.02G019240	RLK
Soltu.DM.02G019250	RLK
Soltu.DM.02G019570	RLK
Soltu.DM.02G019610	RLK
Soltu.DM.02G019620	RLK
Soltu.DM.02G019650	RLK
Soltu.DM.02G019660	RLK
Soltu.DM.02G019670	RLK
Soltu.DM.02G019690	RLK
Soltu.DM.02G020560	RLK
Soltu.DM.02G020600	RLK
Soltu.DM.02G020990	RLK
Soltu.DM.02G021000	RLK
Soltu.DM.02G021050	RLK
Soltu.DM.02G021070	RLK
Soltu.DM.02G021080	RLK
Soltu.DM.02G021330	RLK
Soltu.DM.02G022440	RLK
Soltu.DM.02G024210	RLK
Soltu.DM.02G025250	RLK
Soltu.DM.02G026090	RLK
Soltu.DM.02G026160	RLK
Soltu.DM.02G026170	RLK
Soltu.DM.02G026890	RLK
Soltu.DM.02G027100	RLK
Soltu.DM.02G027120	RLK
Soltu.DM.02G028200	RLK
Soltu.DM.02G028370	RLK
Soltu.DM.02G029720	RLK
Soltu.DM.02G029900	RLK
Soltu.DM.02G029910	RLK
Soltu.DM.02G030050	RLK
Soltu.DM.02G030250	RLK
Soltu.DM.02G030500	RLK
Soltu.DM.02G030700	RLK
Soltu.DM.02G030720	RLK
Soltu.DM.02G030800	RLK
Soltu.DM.02G032270	RLK
Soltu.DM.02G032780	RLK
Soltu.DM.02G033170	RLK
Soltu.DM.02G034050	RLK
Soltu.DM.02G034090	RLK
Soltu.DM.03G000170	RLK
Soltu.DM.03G001070	RLK
Soltu.DM.03G001190	RLK
Soltu.DM.03G001270	RLK
Soltu.DM.03G001360	RLK
Soltu.DM.03G001370	RLK
Soltu.DM.03G001390	RLK
Soltu.DM.03G001400	RLK
Soltu.DM.03G001460	RLK
Soltu.DM.03G001590	RLK
Soltu.DM.03G001610	RLK
Soltu.DM.03G001640	RLK
Soltu.DM.03G001690	RLK
Soltu.DM.03G001710	RLK
Soltu.DM.03G001720	RLK
Soltu.DM.03G001910	RLK
Soltu.DM.03G002530	RLK
Soltu.DM.03G002540	RLK
Soltu.DM.03G002620	RLK
Soltu.DM.03G003170	RLK
Soltu.DM.03G003760	RLK
Soltu.DM.03G004240	RLK
Soltu.DM.03G005000	RLK
Soltu.DM.03G005050	RLK
Soltu.DM.03G005610	RLK
Soltu.DM.03G007830	RLK
Soltu.DM.03G008430	RLK
Soltu.DM.03G008650	RLK
Soltu.DM.03G009170	RLK
Soltu.DM.03G009280	RLK
Soltu.DM.03G009770	RLK
Soltu.DM.03G011680	RLK
Soltu.DM.03G011690	RLK
Soltu.DM.03G012000	RLK
Soltu.DM.03G013610	RLK
Soltu.DM.03G014650	RLK
Soltu.DM.03G014740	RLK
Soltu.DM.03G014810	RLK
Soltu.DM.03G015760	RLK
Soltu.DM.03G016170	RLK
Soltu.DM.03G016310	RLK
Soltu.DM.03G017120	RLK
Soltu.DM.03G018980	RLK
Soltu.DM.03G021330	RLK
Soltu.DM.03G021730	RLK
Soltu.DM.03G021750	RLK
Soltu.DM.03G022640	RLK
Soltu.DM.03G022650	RLK
Soltu.DM.03G022660	RLK
Soltu.DM.03G022670	RLK
Soltu.DM.03G022680	RLK
Soltu.DM.03G022970	RLK
Soltu.DM.03G023130	RLK
Soltu.DM.03G023460	RLK
Soltu.DM.03G023960	RLK
Soltu.DM.03G024900	RLK
Soltu.DM.03G024920	RLK
Soltu.DM.03G024930	RLK
Soltu.DM.03G025070	RLK
Soltu.DM.03G025180	RLK
Soltu.DM.03G025950	RLK
Soltu.DM.03G026240	RLK
Soltu.DM.03G026420	RLK
Soltu.DM.03G027360	RLK
Soltu.DM.03G028020	RLK
Soltu.DM.03G029730	RLK
Soltu.DM.03G029840	RLK
Soltu.DM.03G031350	RLK
Soltu.DM.03G031770	RLK
Soltu.DM.03G032730	RLK
Soltu.DM.03G033650	RLK
Soltu.DM.03G033660	RLK
Soltu.DM.03G033670	RLK
Soltu.DM.03G033980	RLK
Soltu.DM.03G034660	RLK
Soltu.DM.03G035460	RLK
Soltu.DM.03G035800	RLK
Soltu.DM.03G036390	RLK
Soltu.DM.03G036990	RLK
Soltu.DM.03G037530	RLK
Soltu.DM.03G037560	RLK
Soltu.DM.03G037630	RLK
Soltu.DM.03G037850	RLK
Soltu.DM.04G000500	RLK
Soltu.DM.04G001270	RLK
Soltu.DM.04G001300	RLK
Soltu.DM.04G002250	RLK
Soltu.DM.04G002270	RLK
Soltu.DM.04G004040	RLK
Soltu.DM.04G004050	RLK
Soltu.DM.04G004090	RLK
Soltu.DM.04G004540	RLK
Soltu.DM.04G006180	RLK
Soltu.DM.04G008310	RLK
Soltu.DM.04G008350	RLK
Soltu.DM.04G008380	RLK
Soltu.DM.04G008390	RLK
Soltu.DM.04G008450	RLK
Soltu.DM.04G009030	RLK
Soltu.DM.04G009040	RLK
Soltu.DM.04G009370	RLK
Soltu.DM.04G009390	RLK
Soltu.DM.04G009410	RLK
Soltu.DM.04G009440	RLK
Soltu.DM.04G009490	RLK
Soltu.DM.04G009560	RLK
Soltu.DM.04G009570	RLK
Soltu.DM.04G009630	RLK
Soltu.DM.04G009640	RLK
Soltu.DM.04G009730	RLK
Soltu.DM.04G009760	RLK
Soltu.DM.04G009770	RLK
Soltu.DM.04G009880	RLK
Soltu.DM.04G009940	RLK
Soltu.DM.04G009950	RLK
Soltu.DM.04G010480	RLK
Soltu.DM.04G010650	RLK
Soltu.DM.04G013740	RLK
Soltu.DM.04G014290	RLK
Soltu.DM.04G016660	RLK
Soltu.DM.04G019530	RLK
Soltu.DM.04G020160	RLK
Soltu.DM.04G020180	RLK
Soltu.DM.04G022840	RLK
Soltu.DM.04G023990	RLK
Soltu.DM.04G024250	RLK
Soltu.DM.04G026080	RLK
Soltu.DM.04G026300	RLK
Soltu.DM.04G027350	RLK
Soltu.DM.04G027620	RLK
Soltu.DM.04G027950	RLK
Soltu.DM.04G028700	RLK
Soltu.DM.04G029330	RLK
Soltu.DM.04G029340	RLK
Soltu.DM.04G029400	RLK
Soltu.DM.04G029410	RLK
Soltu.DM.04G029450	RLK
Soltu.DM.04G029480	RLK
Soltu.DM.04G029490	RLK
Soltu.DM.04G029510	RLK
Soltu.DM.04G029530	RLK
Soltu.DM.04G029540	RLK
Soltu.DM.04G029570	RLK
Soltu.DM.04G029590	RLK
Soltu.DM.04G029600	RLK
Soltu.DM.04G031690	RLK
Soltu.DM.04G031720	RLK
Soltu.DM.04G031990	RLK
Soltu.DM.04G032000	RLK
Soltu.DM.04G032030	RLK
Soltu.DM.04G032040	RLK
Soltu.DM.04G032050	RLK
Soltu.DM.04G032060	RLK
Soltu.DM.04G032080	RLK
Soltu.DM.04G032100	RLK
Soltu.DM.04G032910	RLK
Soltu.DM.04G033170	RLK
Soltu.DM.04G033340	RLK
Soltu.DM.04G033450	RLK
Soltu.DM.04G034670	RLK
Soltu.DM.04G036200	RLK
Soltu.DM.04G036750	RLK
Soltu.DM.04G037030	RLK
Soltu.DM.04G037840	RLK
Soltu.DM.05G001850	RLK
Soltu.DM.05G002190	RLK
Soltu.DM.05G003400	RLK
Soltu.DM.05G003410	RLK
Soltu.DM.05G003430	RLK
Soltu.DM.05G003450	RLK
Soltu.DM.05G003460	RLK
Soltu.DM.05G003470	RLK
Soltu.DM.05G003480	RLK
Soltu.DM.05G003490	RLK
Soltu.DM.05G003510	RLK
Soltu.DM.05G003530	RLK
Soltu.DM.05G003550	RLK
Soltu.DM.05G003560	RLK
Soltu.DM.05G003580	RLK
Soltu.DM.05G003590	RLK
Soltu.DM.05G003640	RLK
Soltu.DM.05G003650	RLK
Soltu.DM.05G003660	RLK
Soltu.DM.05G003680	RLK
Soltu.DM.05G003690	RLK
Soltu.DM.05G003720	RLK
Soltu.DM.05G003730	RLK
Soltu.DM.05G003740	RLK
Soltu.DM.05G003750	RLK
Soltu.DM.05G003760	RLK
Soltu.DM.05G003770	RLK
Soltu.DM.05G003780	RLK
Soltu.DM.05G003790	RLK
Soltu.DM.05G003800	RLK
Soltu.DM.05G003880	RLK
Soltu.DM.05G004640	RLK
Soltu.DM.05G006140	RLK
Soltu.DM.05G006290	RLK
Soltu.DM.05G006660	RLK
Soltu.DM.05G006890	RLK
Soltu.DM.05G008160	RLK
Soltu.DM.05G008340	RLK
Soltu.DM.05G009130	RLK
Soltu.DM.05G009330	RLK
Soltu.DM.05G009340	RLK
Soltu.DM.05G010490	RLK
Soltu.DM.05G011520	RLK
Soltu.DM.05G012760	RLK
Soltu.DM.05G013970	RLK
Soltu.DM.05G014720	RLK
Soltu.DM.05G019220	RLK
Soltu.DM.05G021590	RLK
Soltu.DM.05G022320	RLK
Soltu.DM.05G022410	RLK
Soltu.DM.05G022610	RLK
Soltu.DM.05G023040	RLK
Soltu.DM.05G023870	RLK
Soltu.DM.05G025250	RLK
Soltu.DM.05G025420	RLK
Soltu.DM.05G027080	RLK
Soltu.DM.06G000200	RLK
Soltu.DM.06G000210	RLK
Soltu.DM.06G000710	RLK
Soltu.DM.06G002810	RLK
Soltu.DM.06G003250	RLK
Soltu.DM.06G003450	RLK
Soltu.DM.06G003480	RLK
Soltu.DM.06G003570	RLK
Soltu.DM.06G004610	RLK
Soltu.DM.06G005040	RLK
Soltu.DM.06G009380	RLK
Soltu.DM.06G010140	RLK
Soltu.DM.06G010350	RLK
Soltu.DM.06G010870	RLK
Soltu.DM.06G010880	RLK
Soltu.DM.06G011560	RLK
Soltu.DM.06G011830	RLK
Soltu.DM.06G011900	RLK
Soltu.DM.06G012020	RLK
Soltu.DM.06G013570	RLK
Soltu.DM.06G020220	RLK
Soltu.DM.06G021720	RLK
Soltu.DM.06G022100	RLK
Soltu.DM.06G024260	RLK
Soltu.DM.06G024840	RLK
Soltu.DM.06G025690	RLK
Soltu.DM.06G025730	RLK
Soltu.DM.06G026940	RLK
Soltu.DM.06G029460	RLK
Soltu.DM.06G032750	RLK
Soltu.DM.06G032910	RLK
Soltu.DM.06G033190	RLK
Soltu.DM.07G000020	RLK
Soltu.DM.07G000160	RLK
Soltu.DM.07G000180	RLK
Soltu.DM.07G000250	RLK
Soltu.DM.07G000510	RLK
Soltu.DM.07G000580	RLK
Soltu.DM.07G001040	RLK
Soltu.DM.07G001220	RLK
Soltu.DM.07G001670	RLK
Soltu.DM.07G001680	RLK
Soltu.DM.07G001700	RLK
Soltu.DM.07G002090	RLK
Soltu.DM.07G002280	RLK
Soltu.DM.07G002340	RLK
Soltu.DM.07G002380	RLK
Soltu.DM.07G003140	RLK
Soltu.DM.07G005240	RLK
Soltu.DM.07G005310	RLK
Soltu.DM.07G005320	RLK
Soltu.DM.07G005420	RLK
Soltu.DM.07G006230	RLK
Soltu.DM.07G011680	RLK
Soltu.DM.07G015620	RLK
Soltu.DM.07G018560	RLK
Soltu.DM.07G018570	RLK
Soltu.DM.07G018580	RLK
Soltu.DM.07G018590	RLK
Soltu.DM.07G018600	RLK
Soltu.DM.07G018610	RLK
Soltu.DM.07G018750	RLK
Soltu.DM.07G019300	RLK
Soltu.DM.07G020020	RLK
Soltu.DM.07G020260	RLK
Soltu.DM.07G020980	RLK
Soltu.DM.07G021200	RLK
Soltu.DM.07G021210	RLK
Soltu.DM.07G021250	RLK
Soltu.DM.07G021270	RLK
Soltu.DM.07G021290	RLK
Soltu.DM.07G021300	RLK
Soltu.DM.07G021320	RLK
Soltu.DM.07G021530	RLK
Soltu.DM.07G021540	RLK
Soltu.DM.07G021600	RLK
Soltu.DM.07G021620	RLK
Soltu.DM.07G021630	RLK
Soltu.DM.07G021640	RLK
Soltu.DM.07G021660	RLK
Soltu.DM.07G021820	RLK
Soltu.DM.07G022430	RLK
Soltu.DM.07G023160	RLK
Soltu.DM.07G023310	RLK
Soltu.DM.07G024150	RLK
Soltu.DM.07G024780	RLK
Soltu.DM.07G025000	RLK
Soltu.DM.07G025020	RLK
Soltu.DM.07G025030	RLK
Soltu.DM.07G025050	RLK
Soltu.DM.07G025060	RLK
Soltu.DM.07G025070	RLK
Soltu.DM.07G025120	RLK
Soltu.DM.07G025140	RLK
Soltu.DM.07G025310	RLK
Soltu.DM.07G026500	RLK
Soltu.DM.07G026940	RLK
Soltu.DM.07G027340	RLK
Soltu.DM.07G027700	RLK
Soltu.DM.07G028160	RLK
Soltu.DM.07G028510	RLK
Soltu.DM.07G028520	RLK
Soltu.DM.08G011310	RLK
Soltu.DM.08G011530	RLK
Soltu.DM.08G011810	RLK
Soltu.DM.08G012010	RLK
Soltu.DM.08G014360	RLK
Soltu.DM.08G014530	RLK
Soltu.DM.08G014550	RLK
Soltu.DM.08G014570	RLK
Soltu.DM.08G014590	RLK
Soltu.DM.08G014810	RLK
Soltu.DM.08G015880	RLK
Soltu.DM.08G017380	RLK
Soltu.DM.08G018610	RLK
Soltu.DM.08G019420	RLK
Soltu.DM.08G020160	RLK
Soltu.DM.08G020470	RLK
Soltu.DM.08G020480	RLK
Soltu.DM.08G020490	RLK
Soltu.DM.08G020630	RLK
Soltu.DM.08G020710	RLK
Soltu.DM.08G020730	RLK
Soltu.DM.08G020740	RLK
Soltu.DM.08G020940	RLK
Soltu.DM.08G020950	RLK
Soltu.DM.08G020960	RLK
Soltu.DM.08G021430	RLK
Soltu.DM.08G021780	RLK
Soltu.DM.08G021790	RLK
Soltu.DM.08G021800	RLK
Soltu.DM.08G025900	RLK
Soltu.DM.08G026270	RLK
Soltu.DM.08G027560	RLK
Soltu.DM.08G028670	RLK
Soltu.DM.08G029040	RLK
Soltu.DM.09G000260	RLK
Soltu.DM.09G000280	RLK
Soltu.DM.09G000290	RLK
Soltu.DM.09G000300	RLK
Soltu.DM.09G000810	RLK
Soltu.DM.09G000820	RLK
Soltu.DM.09G000840	RLK
Soltu.DM.09G001580	RLK
Soltu.DM.09G001590	RLK
Soltu.DM.09G001600	RLK
Soltu.DM.09G001730	RLK
Soltu.DM.09G001860	RLK
Soltu.DM.09G001870	RLK
Soltu.DM.09G001890	RLK
Soltu.DM.09G004460	RLK
Soltu.DM.09G004690	RLK
Soltu.DM.09G005890	RLK
Soltu.DM.09G006180	RLK
Soltu.DM.09G006540	RLK
Soltu.DM.09G006820	RLK
Soltu.DM.09G007720	RLK
Soltu.DM.09G008330	RLK
Soltu.DM.09G008340	RLK
Soltu.DM.09G008360	RLK
Soltu.DM.09G008370	RLK
Soltu.DM.09G008970	RLK
Soltu.DM.09G008980	RLK
Soltu.DM.09G009180	RLK
Soltu.DM.09G009220	RLK
Soltu.DM.09G009230	RLK
Soltu.DM.09G009260	RLK
Soltu.DM.09G009290	RLK
Soltu.DM.09G010080	RLK
Soltu.DM.09G010610	RLK
Soltu.DM.09G010650	RLK
Soltu.DM.09G010980	RLK
Soltu.DM.09G011220	RLK
Soltu.DM.09G012800	RLK
Soltu.DM.09G012910	RLK
Soltu.DM.09G014180	RLK
Soltu.DM.09G017030	RLK
Soltu.DM.09G017920	RLK
Soltu.DM.09G018390	RLK
Soltu.DM.09G018760	RLK
Soltu.DM.09G018950	RLK
Soltu.DM.09G022100	RLK
Soltu.DM.09G022580	RLK
Soltu.DM.09G024220	RLK
Soltu.DM.09G024240	RLK
Soltu.DM.09G024250	RLK
Soltu.DM.09G025630	RLK
Soltu.DM.09G025640	RLK
Soltu.DM.09G026810	RLK
Soltu.DM.09G028140	RLK
Soltu.DM.09G028420	RLK
Soltu.DM.09G029750	RLK
Soltu.DM.09G031500	RLK
Soltu.DM.09G031640	RLK
Soltu.DM.10G000320	RLK
Soltu.DM.10G000520	RLK
Soltu.DM.10G002070	RLK
Soltu.DM.10G002080	RLK
Soltu.DM.10G002220	RLK
Soltu.DM.10G004850	RLK
Soltu.DM.10G006290	RLK
Soltu.DM.10G006920	RLK
Soltu.DM.10G009600	RLK
Soltu.DM.10G012540	RLK
Soltu.DM.10G013070	RLK
Soltu.DM.10G013090	RLK
Soltu.DM.10G013100	RLK
Soltu.DM.10G013140	RLK
Soltu.DM.10G013190	RLK
Soltu.DM.10G013650	RLK
Soltu.DM.10G014580	RLK
Soltu.DM.10G015740	RLK
Soltu.DM.10G016300	RLK
Soltu.DM.10G016480	RLK
Soltu.DM.10G016540	RLK
Soltu.DM.10G017360	RLK
Soltu.DM.10G018490	RLK
Soltu.DM.10G018500	RLK
Soltu.DM.10G019460	RLK
Soltu.DM.10G019470	RLK
Soltu.DM.10G019510	RLK
Soltu.DM.10G019520	RLK
Soltu.DM.10G019540	RLK
Soltu.DM.10G019550	RLK
Soltu.DM.10G019560	RLK
Soltu.DM.10G021930	RLK
Soltu.DM.10G022760	RLK
Soltu.DM.10G022770	RLK
Soltu.DM.10G023210	RLK
Soltu.DM.10G023930	RLK
Soltu.DM.10G025430	RLK
Soltu.DM.10G025620	RLK
Soltu.DM.10G025930	RLK
Soltu.DM.10G026880	RLK
Soltu.DM.10G028270	RLK
Soltu.DM.11G001100	RLK
Soltu.DM.11G001180	RLK
Soltu.DM.11G002580	RLK
Soltu.DM.11G003680	RLK
Soltu.DM.11G005620	RLK
Soltu.DM.11G005650	RLK
Soltu.DM.11G005850	RLK
Soltu.DM.11G007950	RLK
Soltu.DM.11G008380	RLK
Soltu.DM.11G008450	RLK
Soltu.DM.11G008490	RLK
Soltu.DM.11G008510	RLK
Soltu.DM.11G009590	RLK
Soltu.DM.11G009960	RLK
Soltu.DM.11G009970	RLK
Soltu.DM.11G009980	RLK
Soltu.DM.11G010320	RLK
Soltu.DM.11G010980	RLK
Soltu.DM.11G012150	RLK
Soltu.DM.11G012170	RLK
Soltu.DM.11G015600	RLK
Soltu.DM.11G016310	RLK
Soltu.DM.11G016760	RLK
Soltu.DM.11G016810	RLK
Soltu.DM.11G017110	RLK
Soltu.DM.11G017870	RLK
Soltu.DM.11G018660	RLK
Soltu.DM.11G022850	RLK
Soltu.DM.11G022880	RLK
Soltu.DM.11G023520	RLK
Soltu.DM.11G024740	RLK
Soltu.DM.11G024940	RLK
Soltu.DM.11G025150	RLK
Soltu.DM.11G025170	RLK
Soltu.DM.11G026060	RLK
Soltu.DM.11G026340	RLK
Soltu.DM.12G001160	RLK
Soltu.DM.12G001970	RLK
Soltu.DM.12G002550	RLK
Soltu.DM.12G003010	RLK
Soltu.DM.12G003680	RLK
Soltu.DM.12G003690	RLK
Soltu.DM.12G005370	RLK
Soltu.DM.12G005500	RLK
Soltu.DM.12G005780	RLK
Soltu.DM.12G006540	RLK
Soltu.DM.12G006670	RLK
Soltu.DM.12G007420	RLK
Soltu.DM.12G007970	RLK
Soltu.DM.12G008730	RLK
Soltu.DM.12G010770	RLK
Soltu.DM.12G011910	RLK
Soltu.DM.12G011930	RLK
Soltu.DM.12G011940	RLK
Soltu.DM.12G011950	RLK
Soltu.DM.12G015420	RLK
Soltu.DM.12G022160	RLK
Soltu.DM.12G022690	RLK
Soltu.DM.12G022720	RLK
Soltu.DM.12G024700	RLK
Soltu.DM.12G024990	RLK
Soltu.DM.12G025460	RLK
Soltu.DM.12G026240	RLK
Soltu.DM.12G028330	RLK
Soltu.DM.12G030180	RLK
Soltu.DM.S001780	RLK
Soltu.DM.01G001240	RLP
Soltu.DM.01G001250	RLP
Soltu.DM.01G001280	RLP
Soltu.DM.01G001300	RLP
Soltu.DM.01G001320	RLP
Soltu.DM.01G004020	RLP
Soltu.DM.01G004110	RLP
Soltu.DM.01G004120	RLP
Soltu.DM.01G004140	RLP
Soltu.DM.01G004150	RLP
Soltu.DM.01G004170	RLP
Soltu.DM.01G004300	RLP
Soltu.DM.01G004330	RLP
Soltu.DM.01G004340	RLP
Soltu.DM.01G004460	RLP
Soltu.DM.01G004470	RLP
Soltu.DM.01G004490	RLP
Soltu.DM.01G006570	RLP
Soltu.DM.01G006600	RLP
Soltu.DM.01G006620	RLP
Soltu.DM.01G006640	RLP
Soltu.DM.01G006670	RLP
Soltu.DM.01G006700	RLP
Soltu.DM.01G006740	RLP
Soltu.DM.01G006760	RLP
Soltu.DM.01G007020	RLP
Soltu.DM.01G007600	RLP
Soltu.DM.01G010600	RLP
Soltu.DM.01G018320	RLP
Soltu.DM.01G020550	RLP
Soltu.DM.01G027170	RLP
Soltu.DM.01G032220	RLP
Soltu.DM.01G037800	RLP
Soltu.DM.01G037810	RLP
Soltu.DM.01G038230	RLP
Soltu.DM.01G038250	RLP
Soltu.DM.01G038640	RLP
Soltu.DM.01G041700	RLP
Soltu.DM.02G003500	RLP
Soltu.DM.02G011360	RLP
Soltu.DM.02G011730	RLP
Soltu.DM.02G015420	RLP
Soltu.DM.02G015660	RLP
Soltu.DM.02G017310	RLP
Soltu.DM.02G027320	RLP
Soltu.DM.03G001330	RLP
Soltu.DM.03G001450	RLP
Soltu.DM.03G001520	RLP
Soltu.DM.03G001620	RLP
Soltu.DM.03G001940	RLP
Soltu.DM.03G003680	RLP
Soltu.DM.03G003690	RLP
Soltu.DM.03G023800	RLP
Soltu.DM.03G026370	RLP
Soltu.DM.03G036030	RLP
Soltu.DM.04G001190	RLP
Soltu.DM.04G008460	RLP
Soltu.DM.04G008490	RLP
Soltu.DM.04G008510	RLP
Soltu.DM.04G009010	RLP
Soltu.DM.04G009050	RLP
Soltu.DM.04G009070	RLP
Soltu.DM.04G009450	RLP
Soltu.DM.04G009510	RLP
Soltu.DM.04G009520	RLP
Soltu.DM.04G009530	RLP
Soltu.DM.04G009710	RLP
Soltu.DM.04G009780	RLP
Soltu.DM.04G009900	RLP
Soltu.DM.04G009920	RLP
Soltu.DM.04G009930	RLP
Soltu.DM.04G016310	RLP
Soltu.DM.04G016380	RLP
Soltu.DM.04G020740	RLP
Soltu.DM.04G029380	RLP
Soltu.DM.04G029390	RLP
Soltu.DM.04G029550	RLP
Soltu.DM.04G037440	RLP
Soltu.DM.05G000650	RLP
Soltu.DM.05G002420	RLP
Soltu.DM.05G002590	RLP
Soltu.DM.05G004450	RLP
Soltu.DM.05G007610	RLP
Soltu.DM.05G008630	RLP
Soltu.DM.05G009270	RLP
Soltu.DM.05G013120	RLP
Soltu.DM.05G020980	RLP
Soltu.DM.05G025750	RLP
Soltu.DM.05G025760	RLP
Soltu.DM.06G001460	RLP
Soltu.DM.06G001570	RLP
Soltu.DM.06G001590	RLP
Soltu.DM.06G001620	RLP
Soltu.DM.06G001650	RLP
Soltu.DM.06G001670	RLP
Soltu.DM.06G001790	RLP
Soltu.DM.06G001820	RLP
Soltu.DM.06G001890	RLP
Soltu.DM.06G001920	RLP
Soltu.DM.06G003410	RLP
Soltu.DM.06G003590	RLP
Soltu.DM.06G019330	RLP
Soltu.DM.06G029530	RLP
Soltu.DM.07G001090	RLP
Soltu.DM.07G001660	RLP
Soltu.DM.07G004270	RLP
Soltu.DM.07G004310	RLP
Soltu.DM.07G004320	RLP
Soltu.DM.07G004460	RLP
Soltu.DM.07G005490	RLP
Soltu.DM.07G005910	RLP
Soltu.DM.07G019750	RLP
Soltu.DM.07G019770	RLP
Soltu.DM.07G021830	RLP
Soltu.DM.08G006670	RLP
Soltu.DM.08G006710	RLP
Soltu.DM.08G014560	RLP
Soltu.DM.08G016760	RLP
Soltu.DM.08G016770	RLP
Soltu.DM.08G019470	RLP
Soltu.DM.08G020770	RLP
Soltu.DM.08G020850	RLP
Soltu.DM.08G021250	RLP
Soltu.DM.08G021600	RLP
Soltu.DM.08G023560	RLP
Soltu.DM.08G024130	RLP
Soltu.DM.09G000880	RLP
Soltu.DM.09G007420	RLP
Soltu.DM.09G008770	RLP
Soltu.DM.09G008780	RLP
Soltu.DM.09G008790	RLP
Soltu.DM.09G018420	RLP
Soltu.DM.09G021600	RLP
Soltu.DM.09G022850	RLP
Soltu.DM.09G029670	RLP
Soltu.DM.10G003470	RLP
Soltu.DM.10G019410	RLP
Soltu.DM.10G019420	RLP
Soltu.DM.10G019430	RLP
Soltu.DM.10G022780	RLP
Soltu.DM.11G002410	RLP
Soltu.DM.11G008360	RLP
Soltu.DM.11G008370	RLP
Soltu.DM.11G011250	RLP
Soltu.DM.11G017860	RLP
Soltu.DM.11G024140	RLP
Soltu.DM.11G024180	RLP
Soltu.DM.11G024920	RLP
Soltu.DM.11G026360	RLP
Soltu.DM.12G000120	RLP
Soltu.DM.12G000680	RLP
Soltu.DM.12G000690	RLP
Soltu.DM.12G000720	RLP
Soltu.DM.12G000770	RLP
Soltu.DM.12G000790	RLP
Soltu.DM.12G000820	RLP
Soltu.DM.12G000840	RLP
Soltu.DM.12G000860	RLP
Soltu.DM.12G000880	RLP
Soltu.DM.12G000890	RLP
Soltu.DM.12G000900	RLP
Soltu.DM.12G000930	RLP
Soltu.DM.12G000960	RLP
Soltu.DM.12G000970	RLP
Soltu.DM.12G000980	RLP
Soltu.DM.12G001060	RLP
Soltu.DM.12G002400	RLP
Soltu.DM.12G002430	RLP
Soltu.DM.12G009250	RLP
Soltu.DM.12G009260	RLP
Soltu.DM.12G009270	RLP
Soltu.DM.12G009820	RLP
Soltu.DM.12G009900	RLP
Soltu.DM.12G010160	RLP
Soltu.DM.12G010960	RLP
Soltu.DM.12G011050	RLP
Soltu.DM.12G011850	RLP
Soltu.DM.12G013430	RLP
Soltu.DM.12G022940	RLP
Soltu.DM.12G023450	RLP
Soltu.DM.12G025300	RLP
Soltu.DM.12G026610	RLP
Soltu.DM.12G026640	RLP
Soltu.DM.12G026770	RLP
Soltu.DM.12G026780	RLP
Soltu.DM.12G026810	RLP
Soltu.DM.12G026880	RLP
Soltu.DM.12G026930	RLP
Soltu.DM.12G027080	RLP
Soltu.DM.12G028030	RLP
Soltu.DM.12G029450	RLP
Soltu.DM.12G029480	RLP
Soltu.DM.12G029550	RLP
Soltu.DM.S002600	RLP
Soltu.DM.01G001330	TMCC
Soltu.DM.01G003310	TMCC
Soltu.DM.01G003410	TMCC
Soltu.DM.01G008170	TMCC
Soltu.DM.01G014130	TMCC
Soltu.DM.01G022630	TMCC
Soltu.DM.01G024500	TMCC
Soltu.DM.01G027430	TMCC
Soltu.DM.01G027890	TMCC
Soltu.DM.01G031560	TMCC
Soltu.DM.01G031630	TMCC
Soltu.DM.01G032820	TMCC
Soltu.DM.01G036140	TMCC
Soltu.DM.01G037650	TMCC
Soltu.DM.01G038050	TMCC
Soltu.DM.01G042120	TMCC
Soltu.DM.01G049180	TMCC
Soltu.DM.02G003380	TMCC
Soltu.DM.02G004120	TMCC
Soltu.DM.02G005870	TMCC
Soltu.DM.02G010230	TMCC
Soltu.DM.02G010240	TMCC
Soltu.DM.02G010310	TMCC
Soltu.DM.02G011970	TMCC
Soltu.DM.02G018010	TMCC
Soltu.DM.02G018220	TMCC
Soltu.DM.02G024480	TMCC
Soltu.DM.02G024500	TMCC
Soltu.DM.02G027760	TMCC
Soltu.DM.02G028280	TMCC
Soltu.DM.02G032170	TMCC
Soltu.DM.02G032190	TMCC
Soltu.DM.02G034630	TMCC
Soltu.DM.03G000960	TMCC
Soltu.DM.03G003950	TMCC
Soltu.DM.03G004040	TMCC
Soltu.DM.03G004070	TMCC
Soltu.DM.03G005470	TMCC
Soltu.DM.03G009680	TMCC
Soltu.DM.03G009690	TMCC
Soltu.DM.03G011160	TMCC
Soltu.DM.03G014890	TMCC
Soltu.DM.03G016080	TMCC
Soltu.DM.03G019120	TMCC
Soltu.DM.03G020060	TMCC
Soltu.DM.03G021370	TMCC
Soltu.DM.03G022200	TMCC
Soltu.DM.03G022230	TMCC
Soltu.DM.03G022810	TMCC
Soltu.DM.03G024370	TMCC
Soltu.DM.03G024890	TMCC
Soltu.DM.03G025330	TMCC
Soltu.DM.03G025340	TMCC
Soltu.DM.03G025350	TMCC
Soltu.DM.03G025430	TMCC
Soltu.DM.03G025440	TMCC
Soltu.DM.03G025450	TMCC
Soltu.DM.03G025470	TMCC
Soltu.DM.03G027630	TMCC
Soltu.DM.03G029860	TMCC
Soltu.DM.03G032210	TMCC
Soltu.DM.03G034580	TMCC
Soltu.DM.03G036370	TMCC
Soltu.DM.03G037820	TMCC
Soltu.DM.04G000770	TMCC
Soltu.DM.04G000900	TMCC
Soltu.DM.04G005020	TMCC
Soltu.DM.04G007260	TMCC
Soltu.DM.04G019800	TMCC
Soltu.DM.04G020540	TMCC
Soltu.DM.04G021320	TMCC
Soltu.DM.04G022510	TMCC
Soltu.DM.04G022590	TMCC
Soltu.DM.04G022680	TMCC
Soltu.DM.04G022860	TMCC
Soltu.DM.04G024140	TMCC
Soltu.DM.04G025070	TMCC
Soltu.DM.04G025260	TMCC
Soltu.DM.04G025620	TMCC
Soltu.DM.04G029610	TMCC
Soltu.DM.04G033030	TMCC
Soltu.DM.04G035380	TMCC
Soltu.DM.04G035960	TMCC
Soltu.DM.05G005580	TMCC
Soltu.DM.05G007060	TMCC
Soltu.DM.05G010750	TMCC
Soltu.DM.05G013210	TMCC
Soltu.DM.05G019310	TMCC
Soltu.DM.05G024650	TMCC
Soltu.DM.05G027320	TMCC
Soltu.DM.06G012500	TMCC
Soltu.DM.06G012530	TMCC
Soltu.DM.06G013550	TMCC
Soltu.DM.06G014430	TMCC
Soltu.DM.06G019580	TMCC
Soltu.DM.06G020520	TMCC
Soltu.DM.06G020680	TMCC
Soltu.DM.06G025990	TMCC
Soltu.DM.06G026070	TMCC
Soltu.DM.06G026080	TMCC
Soltu.DM.06G026420	TMCC
Soltu.DM.06G028240	TMCC
Soltu.DM.06G028290	TMCC
Soltu.DM.06G028890	TMCC
Soltu.DM.06G032800	TMCC
Soltu.DM.07G000930	TMCC
Soltu.DM.07G002370	TMCC
Soltu.DM.07G003020	TMCC
Soltu.DM.07G007810	TMCC
Soltu.DM.07G013610	TMCC
Soltu.DM.07G013640	TMCC
Soltu.DM.07G014090	TMCC
Soltu.DM.07G019310	TMCC
Soltu.DM.07G022350	TMCC
Soltu.DM.08G000410	TMCC
Soltu.DM.08G001030	TMCC
Soltu.DM.08G007310	TMCC
Soltu.DM.08G010650	TMCC
Soltu.DM.08G011720	TMCC
Soltu.DM.08G013330	TMCC
Soltu.DM.08G014180	TMCC
Soltu.DM.08G018780	TMCC
Soltu.DM.08G023940	TMCC
Soltu.DM.08G024760	TMCC
Soltu.DM.08G024970	TMCC
Soltu.DM.08G026300	TMCC
Soltu.DM.08G027040	TMCC
Soltu.DM.08G028270	TMCC
Soltu.DM.09G002710	TMCC
Soltu.DM.09G004610	TMCC
Soltu.DM.09G008280	TMCC
Soltu.DM.09G011290	TMCC
Soltu.DM.09G015150	TMCC
Soltu.DM.09G018860	TMCC
Soltu.DM.09G019870	TMCC
Soltu.DM.09G022110	TMCC
Soltu.DM.09G022920	TMCC
Soltu.DM.09G025150	TMCC
Soltu.DM.09G030060	TMCC
Soltu.DM.09G030070	TMCC
Soltu.DM.09G030180	TMCC
Soltu.DM.09G030220	TMCC
Soltu.DM.09G030260	TMCC
Soltu.DM.09G030300	TMCC
Soltu.DM.09G030930	TMCC
Soltu.DM.10G004430	TMCC
Soltu.DM.10G005180	TMCC
Soltu.DM.10G014270	TMCC
Soltu.DM.10G025490	TMCC
Soltu.DM.10G029870	TMCC
Soltu.DM.11G000480	TMCC
Soltu.DM.11G003860	TMCC
Soltu.DM.11G007260	TMCC
Soltu.DM.11G007270	TMCC
Soltu.DM.11G007280	TMCC
Soltu.DM.11G011860	TMCC
Soltu.DM.12G001890	TMCC
Soltu.DM.12G006010	TMCC
Soltu.DM.12G007630	TMCC
Soltu.DM.12G007920	TMCC
Soltu.DM.12G009590	TMCC
Soltu.DM.12G010310	TMCC
Soltu.DM.12G015050	TMCC
Soltu.DM.12G019570	TMCC
Soltu.DM.12G020240	TMCC
Soltu.DM.12G023520	TMCC
Soltu.DM.12G027420	TMCC
Soltu.DM.12G028340	TMCC
