# Supplementary material for: Transcriptome-metabolome integration reveals MYB/WRKY-RGA network and phenylalanine metabolism in potato late blight resistance
Source: Research Square preprint supplement (doi:10.21203/rs.3.rs-8142072/v1), 2025-12-04
Supplement: Supplementary file 5 [file 88cb06ba496c9e8450dec6cb.xlsx]

## Sheet: Sheet1
Supplementary Table S4 Genes in each cluster in the Mfuzz results
Cluster	Gene
Cluster1	Soltu.DM.01G000070
Cluster1	Soltu.DM.01G000160
Cluster1	Soltu.DM.01G000220
Cluster1	Soltu.DM.01G000240
Cluster1	Soltu.DM.01G000310
Cluster1	Soltu.DM.01G000500
Cluster1	Soltu.DM.01G000630
Cluster1	Soltu.DM.01G000710
Cluster1	Soltu.DM.01G000750
Cluster1	Soltu.DM.01G000860
Cluster1	Soltu.DM.01G001210
Cluster1	Soltu.DM.01G001280
Cluster1	Soltu.DM.01G001440
Cluster1	Soltu.DM.01G001790
Cluster1	Soltu.DM.01G001990
Cluster1	Soltu.DM.01G002020
Cluster1	Soltu.DM.01G002120
Cluster1	Soltu.DM.01G002130
Cluster1	Soltu.DM.01G002190
Cluster1	Soltu.DM.01G002320
Cluster1	Soltu.DM.01G002330
Cluster1	Soltu.DM.01G002670
Cluster1	Soltu.DM.01G002820
Cluster1	Soltu.DM.01G002830
Cluster1	Soltu.DM.01G002910
Cluster1	Soltu.DM.01G003010
Cluster1	Soltu.DM.01G003240
Cluster1	Soltu.DM.01G003420
Cluster1	Soltu.DM.01G003430
Cluster1	Soltu.DM.01G003440
Cluster1	Soltu.DM.01G003510
Cluster1	Soltu.DM.01G003530
Cluster1	Soltu.DM.01G003660
Cluster1	Soltu.DM.01G003670
Cluster1	Soltu.DM.01G004290
Cluster1	Soltu.DM.01G004340
Cluster1	Soltu.DM.01G004780
Cluster1	Soltu.DM.01G004820
Cluster1	Soltu.DM.01G005070
Cluster1	Soltu.DM.01G005180
Cluster1	Soltu.DM.01G005400
Cluster1	Soltu.DM.01G005430
Cluster1	Soltu.DM.01G005660
Cluster1	Soltu.DM.01G006200
Cluster1	Soltu.DM.01G006410
Cluster1	Soltu.DM.01G006500
Cluster1	Soltu.DM.01G006850
Cluster1	Soltu.DM.01G006920
Cluster1	Soltu.DM.01G006940
Cluster1	Soltu.DM.01G006960
Cluster1	Soltu.DM.01G006980
Cluster1	Soltu.DM.01G007170
Cluster1	Soltu.DM.01G007280
Cluster1	Soltu.DM.01G007380
Cluster1	Soltu.DM.01G007520
Cluster1	Soltu.DM.01G007760
Cluster1	Soltu.DM.01G007780
Cluster1	Soltu.DM.01G007790
Cluster1	Soltu.DM.01G007800
Cluster1	Soltu.DM.01G008160
Cluster1	Soltu.DM.01G008270
Cluster1	Soltu.DM.01G008340
Cluster1	Soltu.DM.01G008360
Cluster1	Soltu.DM.01G008490
Cluster1	Soltu.DM.01G008560
Cluster1	Soltu.DM.01G008580
Cluster1	Soltu.DM.01G009210
Cluster1	Soltu.DM.01G009330
Cluster1	Soltu.DM.01G010010
Cluster1	Soltu.DM.01G010230
Cluster1	Soltu.DM.01G010580
Cluster1	Soltu.DM.01G011140
Cluster1	Soltu.DM.01G011440
Cluster1	Soltu.DM.01G012270
Cluster1	Soltu.DM.01G012280
Cluster1	Soltu.DM.01G013450
Cluster1	Soltu.DM.01G013580
Cluster1	Soltu.DM.01G014210
Cluster1	Soltu.DM.01G015000
Cluster1	Soltu.DM.01G015500
Cluster1	Soltu.DM.01G015840
Cluster1	Soltu.DM.01G015970
Cluster1	Soltu.DM.01G018470
Cluster1	Soltu.DM.01G018600
Cluster1	Soltu.DM.01G018680
Cluster1	Soltu.DM.01G018690
Cluster1	Soltu.DM.01G018850
Cluster1	Soltu.DM.01G019100
Cluster1	Soltu.DM.01G019360
Cluster1	Soltu.DM.01G019410
Cluster1	Soltu.DM.01G019520
Cluster1	Soltu.DM.01G019800
Cluster1	Soltu.DM.01G019820
Cluster1	Soltu.DM.01G019850
Cluster1	Soltu.DM.01G020010
Cluster1	Soltu.DM.01G020030
Cluster1	Soltu.DM.01G020040
Cluster1	Soltu.DM.01G020050
Cluster1	Soltu.DM.01G020180
Cluster1	Soltu.DM.01G020190
Cluster1	Soltu.DM.01G020300
Cluster1	Soltu.DM.01G020330
Cluster1	Soltu.DM.01G020480
Cluster1	Soltu.DM.01G020880
Cluster1	Soltu.DM.01G021090
Cluster1	Soltu.DM.01G021100
Cluster1	Soltu.DM.01G021140
Cluster1	Soltu.DM.01G021220
Cluster1	Soltu.DM.01G021410
Cluster1	Soltu.DM.01G021450
Cluster1	Soltu.DM.01G021470
Cluster1	Soltu.DM.01G021480
Cluster1	Soltu.DM.01G021550
Cluster1	Soltu.DM.01G021600
Cluster1	Soltu.DM.01G021700
Cluster1	Soltu.DM.01G021720
Cluster1	Soltu.DM.01G021730
Cluster1	Soltu.DM.01G021860
Cluster1	Soltu.DM.01G021880
Cluster1	Soltu.DM.01G021920
Cluster1	Soltu.DM.01G021970
Cluster1	Soltu.DM.01G021980
Cluster1	Soltu.DM.01G021990
Cluster1	Soltu.DM.01G022060
Cluster1	Soltu.DM.01G022180
Cluster1	Soltu.DM.01G022220
Cluster1	Soltu.DM.01G022280
Cluster1	Soltu.DM.01G022330
Cluster1	Soltu.DM.01G022530
Cluster1	Soltu.DM.01G022590
Cluster1	Soltu.DM.01G022660
Cluster1	Soltu.DM.01G022860
Cluster1	Soltu.DM.01G023050
Cluster1	Soltu.DM.01G023430
Cluster1	Soltu.DM.01G023510
Cluster1	Soltu.DM.01G023800
Cluster1	Soltu.DM.01G024100
Cluster1	Soltu.DM.01G024170
Cluster1	Soltu.DM.01G024190
Cluster1	Soltu.DM.01G024450
Cluster1	Soltu.DM.01G024460
Cluster1	Soltu.DM.01G024570
Cluster1	Soltu.DM.01G024750
Cluster1	Soltu.DM.01G024770
Cluster1	Soltu.DM.01G024870
Cluster1	Soltu.DM.01G025040
Cluster1	Soltu.DM.01G025130
Cluster1	Soltu.DM.01G025170
Cluster1	Soltu.DM.01G025400
Cluster1	Soltu.DM.01G025500
Cluster1	Soltu.DM.01G026350
Cluster1	Soltu.DM.01G026480
Cluster1	Soltu.DM.01G026510
Cluster1	Soltu.DM.01G026560
Cluster1	Soltu.DM.01G026640
Cluster1	Soltu.DM.01G026650
Cluster1	Soltu.DM.01G026660
Cluster1	Soltu.DM.01G026770
Cluster1	Soltu.DM.01G027100
Cluster1	Soltu.DM.01G027170
Cluster1	Soltu.DM.01G027350
Cluster1	Soltu.DM.01G027500
Cluster1	Soltu.DM.01G027590
Cluster1	Soltu.DM.01G027660
Cluster1	Soltu.DM.01G027980
Cluster1	Soltu.DM.01G028020
Cluster1	Soltu.DM.01G028030
Cluster1	Soltu.DM.01G028050
Cluster1	Soltu.DM.01G028280
Cluster1	Soltu.DM.01G028390
Cluster1	Soltu.DM.01G028500
Cluster1	Soltu.DM.01G028560
Cluster1	Soltu.DM.01G028580
Cluster1	Soltu.DM.01G028590
Cluster1	Soltu.DM.01G028640
Cluster1	Soltu.DM.01G028650
Cluster1	Soltu.DM.01G028700
Cluster1	Soltu.DM.01G028720
Cluster1	Soltu.DM.01G028870
Cluster1	Soltu.DM.01G028880
Cluster1	Soltu.DM.01G028930
Cluster1	Soltu.DM.01G029030
Cluster1	Soltu.DM.01G029240
Cluster1	Soltu.DM.01G029260
Cluster1	Soltu.DM.01G029360
Cluster1	Soltu.DM.01G029370
Cluster1	Soltu.DM.01G029500
Cluster1	Soltu.DM.01G029520
Cluster1	Soltu.DM.01G029560
Cluster1	Soltu.DM.01G029660
Cluster1	Soltu.DM.01G029680
Cluster1	Soltu.DM.01G029870
Cluster1	Soltu.DM.01G029970
Cluster1	Soltu.DM.01G030020
Cluster1	Soltu.DM.01G030040
Cluster1	Soltu.DM.01G030260
Cluster1	Soltu.DM.01G030860
Cluster1	Soltu.DM.01G030870
Cluster1	Soltu.DM.01G031540
Cluster1	Soltu.DM.01G031620
Cluster1	Soltu.DM.01G031690
Cluster1	Soltu.DM.01G032250
Cluster1	Soltu.DM.01G032410
Cluster1	Soltu.DM.01G032420
Cluster1	Soltu.DM.01G032830
Cluster1	Soltu.DM.01G032850
Cluster1	Soltu.DM.01G033030
Cluster1	Soltu.DM.01G033080
Cluster1	Soltu.DM.01G033160
Cluster1	Soltu.DM.01G033250
Cluster1	Soltu.DM.01G033610
Cluster1	Soltu.DM.01G033780
Cluster1	Soltu.DM.01G033910
Cluster1	Soltu.DM.01G033920
Cluster1	Soltu.DM.01G033980
Cluster1	Soltu.DM.01G034030
Cluster1	Soltu.DM.01G034060
Cluster1	Soltu.DM.01G034070
Cluster1	Soltu.DM.01G034180
Cluster1	Soltu.DM.01G034200
Cluster1	Soltu.DM.01G034240
Cluster1	Soltu.DM.01G034250
Cluster1	Soltu.DM.01G034310
Cluster1	Soltu.DM.01G034400
Cluster1	Soltu.DM.01G034820
Cluster1	Soltu.DM.01G034920
Cluster1	Soltu.DM.01G034960
Cluster1	Soltu.DM.01G035000
Cluster1	Soltu.DM.01G035090
Cluster1	Soltu.DM.01G035150
Cluster1	Soltu.DM.01G035370
Cluster1	Soltu.DM.01G035420
Cluster1	Soltu.DM.01G035690
Cluster1	Soltu.DM.01G035900
Cluster1	Soltu.DM.01G035910
Cluster1	Soltu.DM.01G035950
Cluster1	Soltu.DM.01G036110
Cluster1	Soltu.DM.01G036450
Cluster1	Soltu.DM.01G036460
Cluster1	Soltu.DM.01G036530
Cluster1	Soltu.DM.01G036550
Cluster1	Soltu.DM.01G036560
Cluster1	Soltu.DM.01G036580
Cluster1	Soltu.DM.01G036590
Cluster1	Soltu.DM.01G036640
Cluster1	Soltu.DM.01G036730
Cluster1	Soltu.DM.01G036860
Cluster1	Soltu.DM.01G036880
Cluster1	Soltu.DM.01G037070
Cluster1	Soltu.DM.01G037080
Cluster1	Soltu.DM.01G037120
Cluster1	Soltu.DM.01G037160
Cluster1	Soltu.DM.01G037170
Cluster1	Soltu.DM.01G037580
Cluster1	Soltu.DM.01G037590
Cluster1	Soltu.DM.01G037640
Cluster1	Soltu.DM.01G037660
Cluster1	Soltu.DM.01G037880
Cluster1	Soltu.DM.01G037950
Cluster1	Soltu.DM.01G038080
Cluster1	Soltu.DM.01G038110
Cluster1	Soltu.DM.01G038160
Cluster1	Soltu.DM.01G038210
Cluster1	Soltu.DM.01G038300
Cluster1	Soltu.DM.01G038320
Cluster1	Soltu.DM.01G038470
Cluster1	Soltu.DM.01G038800
Cluster1	Soltu.DM.01G038830
Cluster1	Soltu.DM.01G038990
Cluster1	Soltu.DM.01G039100
Cluster1	Soltu.DM.01G039170
Cluster1	Soltu.DM.01G039180
Cluster1	Soltu.DM.01G039230
Cluster1	Soltu.DM.01G039370
Cluster1	Soltu.DM.01G039540
Cluster1	Soltu.DM.01G039580
Cluster1	Soltu.DM.01G039680
Cluster1	Soltu.DM.01G039710
Cluster1	Soltu.DM.01G039720
Cluster1	Soltu.DM.01G039730
Cluster1	Soltu.DM.01G039800
Cluster1	Soltu.DM.01G039830
Cluster1	Soltu.DM.01G039930
Cluster1	Soltu.DM.01G039990
Cluster1	Soltu.DM.01G040150
Cluster1	Soltu.DM.01G040240
Cluster1	Soltu.DM.01G040550
Cluster1	Soltu.DM.01G040570
Cluster1	Soltu.DM.01G040630
Cluster1	Soltu.DM.01G040670
Cluster1	Soltu.DM.01G040720
Cluster1	Soltu.DM.01G040840
Cluster1	Soltu.DM.01G040850
Cluster1	Soltu.DM.01G040930
Cluster1	Soltu.DM.01G040940
Cluster1	Soltu.DM.01G040950
Cluster1	Soltu.DM.01G040990
Cluster1	Soltu.DM.01G041000
Cluster1	Soltu.DM.01G041030
Cluster1	Soltu.DM.01G041120
Cluster1	Soltu.DM.01G041260
Cluster1	Soltu.DM.01G041270
Cluster1	Soltu.DM.01G041340
Cluster1	Soltu.DM.01G041480
Cluster1	Soltu.DM.01G041640
Cluster1	Soltu.DM.01G041670
Cluster1	Soltu.DM.01G042030
Cluster1	Soltu.DM.01G042200
Cluster1	Soltu.DM.01G042280
Cluster1	Soltu.DM.01G042390
Cluster1	Soltu.DM.01G042410
Cluster1	Soltu.DM.01G042510
Cluster1	Soltu.DM.01G042610
Cluster1	Soltu.DM.01G042710
Cluster1	Soltu.DM.01G042770
Cluster1	Soltu.DM.01G042900
Cluster1	Soltu.DM.01G042910
Cluster1	Soltu.DM.01G043110
Cluster1	Soltu.DM.01G043150
Cluster1	Soltu.DM.01G043620
Cluster1	Soltu.DM.01G043640
Cluster1	Soltu.DM.01G043660
Cluster1	Soltu.DM.01G043840
Cluster1	Soltu.DM.01G043880
Cluster1	Soltu.DM.01G043930
Cluster1	Soltu.DM.01G044000
Cluster1	Soltu.DM.01G044030
Cluster1	Soltu.DM.01G044110
Cluster1	Soltu.DM.01G044190
Cluster1	Soltu.DM.01G044300
Cluster1	Soltu.DM.01G044310
Cluster1	Soltu.DM.01G044520
Cluster1	Soltu.DM.01G044570
Cluster1	Soltu.DM.01G044590
Cluster1	Soltu.DM.01G044760
Cluster1	Soltu.DM.01G044770
Cluster1	Soltu.DM.01G044830
Cluster1	Soltu.DM.01G044870
Cluster1	Soltu.DM.01G045090
Cluster1	Soltu.DM.01G045180
Cluster1	Soltu.DM.01G045440
Cluster1	Soltu.DM.01G045460
Cluster1	Soltu.DM.01G045470
Cluster1	Soltu.DM.01G045600
Cluster1	Soltu.DM.01G045700
Cluster1	Soltu.DM.01G045720
Cluster1	Soltu.DM.01G045730
Cluster1	Soltu.DM.01G045800
Cluster1	Soltu.DM.01G045810
Cluster1	Soltu.DM.01G045820
Cluster1	Soltu.DM.01G045910
Cluster1	Soltu.DM.01G045930
Cluster1	Soltu.DM.01G045950
Cluster1	Soltu.DM.01G046010
Cluster1	Soltu.DM.01G046090
Cluster1	Soltu.DM.01G046100
Cluster1	Soltu.DM.01G046190
Cluster1	Soltu.DM.01G046230
Cluster1	Soltu.DM.01G046480
Cluster1	Soltu.DM.01G046490
Cluster1	Soltu.DM.01G046560
Cluster1	Soltu.DM.01G046670
Cluster1	Soltu.DM.01G046690
Cluster1	Soltu.DM.01G046770
Cluster1	Soltu.DM.01G046780
Cluster1	Soltu.DM.01G047070
Cluster1	Soltu.DM.01G047100
Cluster1	Soltu.DM.01G047120
Cluster1	Soltu.DM.01G047180
Cluster1	Soltu.DM.01G047200
Cluster1	Soltu.DM.01G047230
Cluster1	Soltu.DM.01G047240
Cluster1	Soltu.DM.01G047250
Cluster1	Soltu.DM.01G047260
Cluster1	Soltu.DM.01G047310
Cluster1	Soltu.DM.01G047450
Cluster1	Soltu.DM.01G047690
Cluster1	Soltu.DM.01G047710
Cluster1	Soltu.DM.01G047770
Cluster1	Soltu.DM.01G047840
Cluster1	Soltu.DM.01G047870
Cluster1	Soltu.DM.01G047900
Cluster1	Soltu.DM.01G048200
Cluster1	Soltu.DM.01G048390
Cluster1	Soltu.DM.01G048570
Cluster1	Soltu.DM.01G048590
Cluster1	Soltu.DM.01G048640
Cluster1	Soltu.DM.01G048780
Cluster1	Soltu.DM.01G048810
Cluster1	Soltu.DM.01G048960
Cluster1	Soltu.DM.01G048990
Cluster1	Soltu.DM.01G049030
Cluster1	Soltu.DM.01G049100
Cluster1	Soltu.DM.01G049180
Cluster1	Soltu.DM.01G049360
Cluster1	Soltu.DM.01G049460
Cluster1	Soltu.DM.01G049500
Cluster1	Soltu.DM.01G049510
Cluster1	Soltu.DM.01G049730
Cluster1	Soltu.DM.01G049840
Cluster1	Soltu.DM.01G049900
Cluster1	Soltu.DM.01G049980
Cluster1	Soltu.DM.01G050330
Cluster1	Soltu.DM.01G050460
Cluster1	Soltu.DM.01G050580
Cluster1	Soltu.DM.01G050590
Cluster1	Soltu.DM.01G051010
Cluster1	Soltu.DM.01G051120
Cluster1	Soltu.DM.01G051250
Cluster1	Soltu.DM.01G051530
Cluster1	Soltu.DM.01G051540
Cluster1	Soltu.DM.01G051550
Cluster1	Soltu.DM.01G051600
Cluster1	Soltu.DM.01G051620
Cluster1	Soltu.DM.01G051650
Cluster1	Soltu.DM.01G051870
Cluster1	Soltu.DM.01G051960
Cluster1	Soltu.DM.02G001170
Cluster1	Soltu.DM.02G001620
Cluster1	Soltu.DM.02G001870
Cluster1	Soltu.DM.02G002140
Cluster1	Soltu.DM.02G002340
Cluster1	Soltu.DM.02G002560
Cluster1	Soltu.DM.02G002710
Cluster1	Soltu.DM.02G002820
Cluster1	Soltu.DM.02G003500
Cluster1	Soltu.DM.02G003520
Cluster1	Soltu.DM.02G003620
Cluster1	Soltu.DM.02G003720
Cluster1	Soltu.DM.02G003850
Cluster1	Soltu.DM.02G004080
Cluster1	Soltu.DM.02G004120
Cluster1	Soltu.DM.02G004200
Cluster1	Soltu.DM.02G004410
Cluster1	Soltu.DM.02G004510
Cluster1	Soltu.DM.02G004650
Cluster1	Soltu.DM.02G004770
Cluster1	Soltu.DM.02G004830
Cluster1	Soltu.DM.02G004910
Cluster1	Soltu.DM.02G005260
Cluster1	Soltu.DM.02G005400
Cluster1	Soltu.DM.02G005550
Cluster1	Soltu.DM.02G005810
Cluster1	Soltu.DM.02G006080
Cluster1	Soltu.DM.02G006110
Cluster1	Soltu.DM.02G006190
Cluster1	Soltu.DM.02G006200
Cluster1	Soltu.DM.02G006280
Cluster1	Soltu.DM.02G006310
Cluster1	Soltu.DM.02G006420
Cluster1	Soltu.DM.02G006470
Cluster1	Soltu.DM.02G006490
Cluster1	Soltu.DM.02G007050
Cluster1	Soltu.DM.02G007060
Cluster1	Soltu.DM.02G007090
Cluster1	Soltu.DM.02G007250
Cluster1	Soltu.DM.02G007730
Cluster1	Soltu.DM.02G007770
Cluster1	Soltu.DM.02G008110
Cluster1	Soltu.DM.02G008200
Cluster1	Soltu.DM.02G008230
Cluster1	Soltu.DM.02G008270
Cluster1	Soltu.DM.02G008410
Cluster1	Soltu.DM.02G008430
Cluster1	Soltu.DM.02G008440
Cluster1	Soltu.DM.02G008450
Cluster1	Soltu.DM.02G008600
Cluster1	Soltu.DM.02G008800
Cluster1	Soltu.DM.02G008920
Cluster1	Soltu.DM.02G008970
Cluster1	Soltu.DM.02G009420
Cluster1	Soltu.DM.02G009620
Cluster1	Soltu.DM.02G009990
Cluster1	Soltu.DM.02G010170
Cluster1	Soltu.DM.02G010360
Cluster1	Soltu.DM.02G010370
Cluster1	Soltu.DM.02G010410
Cluster1	Soltu.DM.02G010630
Cluster1	Soltu.DM.02G010640
Cluster1	Soltu.DM.02G010660
Cluster1	Soltu.DM.02G010670
Cluster1	Soltu.DM.02G011050
Cluster1	Soltu.DM.02G011070
Cluster1	Soltu.DM.02G011170
Cluster1	Soltu.DM.02G011180
Cluster1	Soltu.DM.02G011240
Cluster1	Soltu.DM.02G011540
Cluster1	Soltu.DM.02G011810
Cluster1	Soltu.DM.02G011960
Cluster1	Soltu.DM.02G011970
Cluster1	Soltu.DM.02G011980
Cluster1	Soltu.DM.02G011990
Cluster1	Soltu.DM.02G012020
Cluster1	Soltu.DM.02G012030
Cluster1	Soltu.DM.02G012130
Cluster1	Soltu.DM.02G012300
Cluster1	Soltu.DM.02G012320
Cluster1	Soltu.DM.02G012360
Cluster1	Soltu.DM.02G012380
Cluster1	Soltu.DM.02G012450
Cluster1	Soltu.DM.02G012470
Cluster1	Soltu.DM.02G012720
Cluster1	Soltu.DM.02G012730
Cluster1	Soltu.DM.02G012910
Cluster1	Soltu.DM.02G013010
Cluster1	Soltu.DM.02G013170
Cluster1	Soltu.DM.02G013200
Cluster1	Soltu.DM.02G013220
Cluster1	Soltu.DM.02G013240
Cluster1	Soltu.DM.02G013260
Cluster1	Soltu.DM.02G013290
Cluster1	Soltu.DM.02G013300
Cluster1	Soltu.DM.02G013370
Cluster1	Soltu.DM.02G013630
Cluster1	Soltu.DM.02G013650
Cluster1	Soltu.DM.02G013720
Cluster1	Soltu.DM.02G013870
Cluster1	Soltu.DM.02G014150
Cluster1	Soltu.DM.02G014250
Cluster1	Soltu.DM.02G014420
Cluster1	Soltu.DM.02G014460
Cluster1	Soltu.DM.02G014490
Cluster1	Soltu.DM.02G014520
Cluster1	Soltu.DM.02G014570
Cluster1	Soltu.DM.02G014590
Cluster1	Soltu.DM.02G014640
Cluster1	Soltu.DM.02G014810
Cluster1	Soltu.DM.02G014830
Cluster1	Soltu.DM.02G014840
Cluster1	Soltu.DM.02G014850
Cluster1	Soltu.DM.02G014980
Cluster1	Soltu.DM.02G015100
Cluster1	Soltu.DM.02G015110
Cluster1	Soltu.DM.02G015120
Cluster1	Soltu.DM.02G015140
Cluster1	Soltu.DM.02G015220
Cluster1	Soltu.DM.02G015230
Cluster1	Soltu.DM.02G015290
Cluster1	Soltu.DM.02G015300
Cluster1	Soltu.DM.02G015340
Cluster1	Soltu.DM.02G015380
Cluster1	Soltu.DM.02G015390
Cluster1	Soltu.DM.02G015850
Cluster1	Soltu.DM.02G015990
Cluster1	Soltu.DM.02G016000
Cluster1	Soltu.DM.02G016140
Cluster1	Soltu.DM.02G016340
Cluster1	Soltu.DM.02G016370
Cluster1	Soltu.DM.02G016380
Cluster1	Soltu.DM.02G016560
Cluster1	Soltu.DM.02G016570
Cluster1	Soltu.DM.02G016590
Cluster1	Soltu.DM.02G016710
Cluster1	Soltu.DM.02G016830
Cluster1	Soltu.DM.02G016870
Cluster1	Soltu.DM.02G016920
Cluster1	Soltu.DM.02G016980
Cluster1	Soltu.DM.02G017000
Cluster1	Soltu.DM.02G017580
Cluster1	Soltu.DM.02G017590
Cluster1	Soltu.DM.02G017630
Cluster1	Soltu.DM.02G017640
Cluster1	Soltu.DM.02G017750
Cluster1	Soltu.DM.02G017900
Cluster1	Soltu.DM.02G017920
Cluster1	Soltu.DM.02G018040
Cluster1	Soltu.DM.02G018060
Cluster1	Soltu.DM.02G018070
Cluster1	Soltu.DM.02G018110
Cluster1	Soltu.DM.02G018260
Cluster1	Soltu.DM.02G018270
Cluster1	Soltu.DM.02G018290
Cluster1	Soltu.DM.02G018520
Cluster1	Soltu.DM.02G018650
Cluster1	Soltu.DM.02G018700
Cluster1	Soltu.DM.02G018760
Cluster1	Soltu.DM.02G018790
Cluster1	Soltu.DM.02G018910
Cluster1	Soltu.DM.02G018960
Cluster1	Soltu.DM.02G018990
Cluster1	Soltu.DM.02G019040
Cluster1	Soltu.DM.02G019090
Cluster1	Soltu.DM.02G019100
Cluster1	Soltu.DM.02G019120
Cluster1	Soltu.DM.02G019130
Cluster1	Soltu.DM.02G019170
Cluster1	Soltu.DM.02G019250
Cluster1	Soltu.DM.02G019290
Cluster1	Soltu.DM.02G019420
Cluster1	Soltu.DM.02G019450
Cluster1	Soltu.DM.02G019470
Cluster1	Soltu.DM.02G019570
Cluster1	Soltu.DM.02G019580
Cluster1	Soltu.DM.02G019600
Cluster1	Soltu.DM.02G019730
Cluster1	Soltu.DM.02G019810
Cluster1	Soltu.DM.02G020370
Cluster1	Soltu.DM.02G020380
Cluster1	Soltu.DM.02G020390
Cluster1	Soltu.DM.02G020430
Cluster1	Soltu.DM.02G020640
Cluster1	Soltu.DM.02G020800
Cluster1	Soltu.DM.02G020890
Cluster1	Soltu.DM.02G020940
Cluster1	Soltu.DM.02G020950
Cluster1	Soltu.DM.02G021220
Cluster1	Soltu.DM.02G021230
Cluster1	Soltu.DM.02G021250
Cluster1	Soltu.DM.02G021310
Cluster1	Soltu.DM.02G021380
Cluster1	Soltu.DM.02G021500
Cluster1	Soltu.DM.02G021510
Cluster1	Soltu.DM.02G021700
Cluster1	Soltu.DM.02G021850
Cluster1	Soltu.DM.02G021970
Cluster1	Soltu.DM.02G022300
Cluster1	Soltu.DM.02G022360
Cluster1	Soltu.DM.02G022370
Cluster1	Soltu.DM.02G022410
Cluster1	Soltu.DM.02G022520
Cluster1	Soltu.DM.02G022540
Cluster1	Soltu.DM.02G022900
Cluster1	Soltu.DM.02G022930
Cluster1	Soltu.DM.02G022950
Cluster1	Soltu.DM.02G022980
Cluster1	Soltu.DM.02G023010
Cluster1	Soltu.DM.02G023020
Cluster1	Soltu.DM.02G023030
Cluster1	Soltu.DM.02G023040
Cluster1	Soltu.DM.02G023180
Cluster1	Soltu.DM.02G023200
Cluster1	Soltu.DM.02G023250
Cluster1	Soltu.DM.02G023310
Cluster1	Soltu.DM.02G023320
Cluster1	Soltu.DM.02G023340
Cluster1	Soltu.DM.02G023500
Cluster1	Soltu.DM.02G023510
Cluster1	Soltu.DM.02G023690
Cluster1	Soltu.DM.02G023810
Cluster1	Soltu.DM.02G023870
Cluster1	Soltu.DM.02G023910
Cluster1	Soltu.DM.02G024120
Cluster1	Soltu.DM.02G024210
Cluster1	Soltu.DM.02G024320
Cluster1	Soltu.DM.02G024330
Cluster1	Soltu.DM.02G024460
Cluster1	Soltu.DM.02G024550
Cluster1	Soltu.DM.02G024720
Cluster1	Soltu.DM.02G024730
Cluster1	Soltu.DM.02G024780
Cluster1	Soltu.DM.02G024840
Cluster1	Soltu.DM.02G024860
Cluster1	Soltu.DM.02G024870
Cluster1	Soltu.DM.02G024960
Cluster1	Soltu.DM.02G024990
Cluster1	Soltu.DM.02G025180
Cluster1	Soltu.DM.02G025190
Cluster1	Soltu.DM.02G025240
Cluster1	Soltu.DM.02G025250
Cluster1	Soltu.DM.02G025370
Cluster1	Soltu.DM.02G025490
Cluster1	Soltu.DM.02G025610
Cluster1	Soltu.DM.02G025660
Cluster1	Soltu.DM.02G025700
Cluster1	Soltu.DM.02G025930
Cluster1	Soltu.DM.02G026010
Cluster1	Soltu.DM.02G026160
Cluster1	Soltu.DM.02G026170
Cluster1	Soltu.DM.02G026190
Cluster1	Soltu.DM.02G026200
Cluster1	Soltu.DM.02G026240
Cluster1	Soltu.DM.02G026360
Cluster1	Soltu.DM.02G026410
Cluster1	Soltu.DM.02G026480
Cluster1	Soltu.DM.02G026520
Cluster1	Soltu.DM.02G026550
Cluster1	Soltu.DM.02G026570
Cluster1	Soltu.DM.02G026680
Cluster1	Soltu.DM.02G026690
Cluster1	Soltu.DM.02G026710
Cluster1	Soltu.DM.02G026850
Cluster1	Soltu.DM.02G026890
Cluster1	Soltu.DM.02G026920
Cluster1	Soltu.DM.02G026950
Cluster1	Soltu.DM.02G027010
Cluster1	Soltu.DM.02G027020
Cluster1	Soltu.DM.02G027030
Cluster1	Soltu.DM.02G027270
Cluster1	Soltu.DM.02G027280
Cluster1	Soltu.DM.02G027440
Cluster1	Soltu.DM.02G027470
Cluster1	Soltu.DM.02G027550
Cluster1	Soltu.DM.02G027570
Cluster1	Soltu.DM.02G027710
Cluster1	Soltu.DM.02G027740
Cluster1	Soltu.DM.02G027750
Cluster1	Soltu.DM.02G027950
Cluster1	Soltu.DM.02G028040
Cluster1	Soltu.DM.02G028070
Cluster1	Soltu.DM.02G028120
Cluster1	Soltu.DM.02G028130
Cluster1	Soltu.DM.02G028150
Cluster1	Soltu.DM.02G028190
Cluster1	Soltu.DM.02G028230
Cluster1	Soltu.DM.02G028250
Cluster1	Soltu.DM.02G028300
Cluster1	Soltu.DM.02G028450
Cluster1	Soltu.DM.02G028500
Cluster1	Soltu.DM.02G028520
Cluster1	Soltu.DM.02G028530
Cluster1	Soltu.DM.02G028550
Cluster1	Soltu.DM.02G028590
Cluster1	Soltu.DM.02G028710
Cluster1	Soltu.DM.02G028730
Cluster1	Soltu.DM.02G028740
Cluster1	Soltu.DM.02G028790
Cluster1	Soltu.DM.02G028830
Cluster1	Soltu.DM.02G028930
Cluster1	Soltu.DM.02G029060
Cluster1	Soltu.DM.02G029070
Cluster1	Soltu.DM.02G029140
Cluster1	Soltu.DM.02G029230
Cluster1	Soltu.DM.02G029300
Cluster1	Soltu.DM.02G029430
Cluster1	Soltu.DM.02G029460
Cluster1	Soltu.DM.02G029680
Cluster1	Soltu.DM.02G029720
Cluster1	Soltu.DM.02G029760
Cluster1	Soltu.DM.02G029900
Cluster1	Soltu.DM.02G029910
Cluster1	Soltu.DM.02G029920
Cluster1	Soltu.DM.02G029940
Cluster1	Soltu.DM.02G030060
Cluster1	Soltu.DM.02G030070
Cluster1	Soltu.DM.02G030110
Cluster1	Soltu.DM.02G030150
Cluster1	Soltu.DM.02G030160
Cluster1	Soltu.DM.02G030340
Cluster1	Soltu.DM.02G030410
Cluster1	Soltu.DM.02G030560
Cluster1	Soltu.DM.02G030630
Cluster1	Soltu.DM.02G030650
Cluster1	Soltu.DM.02G030680
Cluster1	Soltu.DM.02G030830
Cluster1	Soltu.DM.02G030840
Cluster1	Soltu.DM.02G030860
Cluster1	Soltu.DM.02G031010
Cluster1	Soltu.DM.02G031050
Cluster1	Soltu.DM.02G031060
Cluster1	Soltu.DM.02G031090
Cluster1	Soltu.DM.02G031380
Cluster1	Soltu.DM.02G031470
Cluster1	Soltu.DM.02G031630
Cluster1	Soltu.DM.02G031670
Cluster1	Soltu.DM.02G031700
Cluster1	Soltu.DM.02G031740
Cluster1	Soltu.DM.02G031890
Cluster1	Soltu.DM.02G031960
Cluster1	Soltu.DM.02G032020
Cluster1	Soltu.DM.02G032030
Cluster1	Soltu.DM.02G032130
Cluster1	Soltu.DM.02G032250
Cluster1	Soltu.DM.02G032280
Cluster1	Soltu.DM.02G032330
Cluster1	Soltu.DM.02G032360
Cluster1	Soltu.DM.02G032380
Cluster1	Soltu.DM.02G032400
Cluster1	Soltu.DM.02G032500
Cluster1	Soltu.DM.02G032550
Cluster1	Soltu.DM.02G032570
Cluster1	Soltu.DM.02G032650
Cluster1	Soltu.DM.02G032680
Cluster1	Soltu.DM.02G032720
Cluster1	Soltu.DM.02G032790
Cluster1	Soltu.DM.02G032900
Cluster1	Soltu.DM.02G033170
Cluster1	Soltu.DM.02G033310
Cluster1	Soltu.DM.02G033400
Cluster1	Soltu.DM.02G033570
Cluster1	Soltu.DM.02G033720
Cluster1	Soltu.DM.02G033730
Cluster1	Soltu.DM.02G033770
Cluster1	Soltu.DM.02G033820
Cluster1	Soltu.DM.02G033930
Cluster1	Soltu.DM.02G033940
Cluster1	Soltu.DM.02G033950
Cluster1	Soltu.DM.02G034080
Cluster1	Soltu.DM.02G034110
Cluster1	Soltu.DM.02G034160
Cluster1	Soltu.DM.02G034250
Cluster1	Soltu.DM.02G034260
Cluster1	Soltu.DM.02G034280
Cluster1	Soltu.DM.02G034320
Cluster1	Soltu.DM.03G000090
Cluster1	Soltu.DM.03G000110
Cluster1	Soltu.DM.03G000180
Cluster1	Soltu.DM.03G000420
Cluster1	Soltu.DM.03G000450
Cluster1	Soltu.DM.03G000530
Cluster1	Soltu.DM.03G000560
Cluster1	Soltu.DM.03G000640
Cluster1	Soltu.DM.03G000930
Cluster1	Soltu.DM.03G000980
Cluster1	Soltu.DM.03G000990
Cluster1	Soltu.DM.03G001000
Cluster1	Soltu.DM.03G001100
Cluster1	Soltu.DM.03G001140
Cluster1	Soltu.DM.03G001150
Cluster1	Soltu.DM.03G001180
Cluster1	Soltu.DM.03G001440
Cluster1	Soltu.DM.03G001460
Cluster1	Soltu.DM.03G001840
Cluster1	Soltu.DM.03G002140
Cluster1	Soltu.DM.03G002170
Cluster1	Soltu.DM.03G002260
Cluster1	Soltu.DM.03G002330
Cluster1	Soltu.DM.03G002350
Cluster1	Soltu.DM.03G002490
Cluster1	Soltu.DM.03G002690
Cluster1	Soltu.DM.03G002800
Cluster1	Soltu.DM.03G002820
Cluster1	Soltu.DM.03G002840
Cluster1	Soltu.DM.03G002940
Cluster1	Soltu.DM.03G003010
Cluster1	Soltu.DM.03G003070
Cluster1	Soltu.DM.03G003100
Cluster1	Soltu.DM.03G003170
Cluster1	Soltu.DM.03G003300
Cluster1	Soltu.DM.03G003630
Cluster1	Soltu.DM.03G004180
Cluster1	Soltu.DM.03G004500
Cluster1	Soltu.DM.03G004510
Cluster1	Soltu.DM.03G004570
Cluster1	Soltu.DM.03G004580
Cluster1	Soltu.DM.03G004700
Cluster1	Soltu.DM.03G004710
Cluster1	Soltu.DM.03G004740
Cluster1	Soltu.DM.03G005260
Cluster1	Soltu.DM.03G005390
Cluster1	Soltu.DM.03G005420
Cluster1	Soltu.DM.03G005510
Cluster1	Soltu.DM.03G005770
Cluster1	Soltu.DM.03G006110
Cluster1	Soltu.DM.03G006190
Cluster1	Soltu.DM.03G006240
Cluster1	Soltu.DM.03G007830
Cluster1	Soltu.DM.03G007930
Cluster1	Soltu.DM.03G008210
Cluster1	Soltu.DM.03G008860
Cluster1	Soltu.DM.03G009360
Cluster1	Soltu.DM.03G010470
Cluster1	Soltu.DM.03G011690
Cluster1	Soltu.DM.03G011790
Cluster1	Soltu.DM.03G011900
Cluster1	Soltu.DM.03G011910
Cluster1	Soltu.DM.03G011920
Cluster1	Soltu.DM.03G011980
Cluster1	Soltu.DM.03G011990
Cluster1	Soltu.DM.03G012380
Cluster1	Soltu.DM.03G012630
Cluster1	Soltu.DM.03G012640
Cluster1	Soltu.DM.03G012690
Cluster1	Soltu.DM.03G012950
Cluster1	Soltu.DM.03G013040
Cluster1	Soltu.DM.03G013060
Cluster1	Soltu.DM.03G013240
Cluster1	Soltu.DM.03G013520
Cluster1	Soltu.DM.03G013590
Cluster1	Soltu.DM.03G013600
Cluster1	Soltu.DM.03G013630
Cluster1	Soltu.DM.03G013870
Cluster1	Soltu.DM.03G013880
Cluster1	Soltu.DM.03G013940
Cluster1	Soltu.DM.03G014180
Cluster1	Soltu.DM.03G014200
Cluster1	Soltu.DM.03G014210
Cluster1	Soltu.DM.03G014780
Cluster1	Soltu.DM.03G015040
Cluster1	Soltu.DM.03G015050
Cluster1	Soltu.DM.03G015060
Cluster1	Soltu.DM.03G015070
Cluster1	Soltu.DM.03G015260
Cluster1	Soltu.DM.03G015270
Cluster1	Soltu.DM.03G015450
Cluster1	Soltu.DM.03G015460
Cluster1	Soltu.DM.03G015490
Cluster1	Soltu.DM.03G015500
Cluster1	Soltu.DM.03G015510
Cluster1	Soltu.DM.03G015520
Cluster1	Soltu.DM.03G015540
Cluster1	Soltu.DM.03G015630
Cluster1	Soltu.DM.03G015670
Cluster1	Soltu.DM.03G016030
Cluster1	Soltu.DM.03G016180
Cluster1	Soltu.DM.03G016430
Cluster1	Soltu.DM.03G016480
Cluster1	Soltu.DM.03G016520
Cluster1	Soltu.DM.03G016590
Cluster1	Soltu.DM.03G016600
Cluster1	Soltu.DM.03G016610
Cluster1	Soltu.DM.03G016690
Cluster1	Soltu.DM.03G016700
Cluster1	Soltu.DM.03G016740
Cluster1	Soltu.DM.03G016750
Cluster1	Soltu.DM.03G016810
Cluster1	Soltu.DM.03G017480
Cluster1	Soltu.DM.03G017510
Cluster1	Soltu.DM.03G017520
Cluster1	Soltu.DM.03G017550
Cluster1	Soltu.DM.03G017580
Cluster1	Soltu.DM.03G017650
Cluster1	Soltu.DM.03G017760
Cluster1	Soltu.DM.03G017800
Cluster1	Soltu.DM.03G018090
Cluster1	Soltu.DM.03G018160
Cluster1	Soltu.DM.03G018190
Cluster1	Soltu.DM.03G018200
Cluster1	Soltu.DM.03G018210
Cluster1	Soltu.DM.03G018360
Cluster1	Soltu.DM.03G018400
Cluster1	Soltu.DM.03G018430
Cluster1	Soltu.DM.03G018440
Cluster1	Soltu.DM.03G018530
Cluster1	Soltu.DM.03G018680
Cluster1	Soltu.DM.03G018690
Cluster1	Soltu.DM.03G018700
Cluster1	Soltu.DM.03G019120
Cluster1	Soltu.DM.03G019340
Cluster1	Soltu.DM.03G019370
Cluster1	Soltu.DM.03G019430
Cluster1	Soltu.DM.03G019470
Cluster1	Soltu.DM.03G019510
Cluster1	Soltu.DM.03G019620
Cluster1	Soltu.DM.03G019640
Cluster1	Soltu.DM.03G019660
Cluster1	Soltu.DM.03G019900
Cluster1	Soltu.DM.03G020060
Cluster1	Soltu.DM.03G020070
Cluster1	Soltu.DM.03G020100
Cluster1	Soltu.DM.03G020170
Cluster1	Soltu.DM.03G020270
Cluster1	Soltu.DM.03G020300
Cluster1	Soltu.DM.03G020570
Cluster1	Soltu.DM.03G020780
Cluster1	Soltu.DM.03G021000
Cluster1	Soltu.DM.03G021260
Cluster1	Soltu.DM.03G021360
Cluster1	Soltu.DM.03G021420
Cluster1	Soltu.DM.03G021620
Cluster1	Soltu.DM.03G021640
Cluster1	Soltu.DM.03G021650
Cluster1	Soltu.DM.03G021730
Cluster1	Soltu.DM.03G021780
Cluster1	Soltu.DM.03G021810
Cluster1	Soltu.DM.03G021820
Cluster1	Soltu.DM.03G021940
Cluster1	Soltu.DM.03G021950
Cluster1	Soltu.DM.03G022000
Cluster1	Soltu.DM.03G022020
Cluster1	Soltu.DM.03G022030
Cluster1	Soltu.DM.03G022180
Cluster1	Soltu.DM.03G022280
Cluster1	Soltu.DM.03G022640
Cluster1	Soltu.DM.03G022650
Cluster1	Soltu.DM.03G022660
Cluster1	Soltu.DM.03G022970
Cluster1	Soltu.DM.03G023120
Cluster1	Soltu.DM.03G023130
Cluster1	Soltu.DM.03G023160
Cluster1	Soltu.DM.03G023190
Cluster1	Soltu.DM.03G023600
Cluster1	Soltu.DM.03G023640
Cluster1	Soltu.DM.03G023650
Cluster1	Soltu.DM.03G023660
Cluster1	Soltu.DM.03G023690
Cluster1	Soltu.DM.03G023740
Cluster1	Soltu.DM.03G024110
Cluster1	Soltu.DM.03G024120
Cluster1	Soltu.DM.03G024160
Cluster1	Soltu.DM.03G024420
Cluster1	Soltu.DM.03G024570
Cluster1	Soltu.DM.03G024660
Cluster1	Soltu.DM.03G024680
Cluster1	Soltu.DM.03G024690
Cluster1	Soltu.DM.03G024800
Cluster1	Soltu.DM.03G024820
Cluster1	Soltu.DM.03G024870
Cluster1	Soltu.DM.03G024890
Cluster1	Soltu.DM.03G024950
Cluster1	Soltu.DM.03G025010
Cluster1	Soltu.DM.03G025310
Cluster1	Soltu.DM.03G025340
Cluster1	Soltu.DM.03G025380
Cluster1	Soltu.DM.03G025570
Cluster1	Soltu.DM.03G025590
Cluster1	Soltu.DM.03G025700
Cluster1	Soltu.DM.03G025710
Cluster1	Soltu.DM.03G025770
Cluster1	Soltu.DM.03G025920
Cluster1	Soltu.DM.03G025940
Cluster1	Soltu.DM.03G025950
Cluster1	Soltu.DM.03G025980
Cluster1	Soltu.DM.03G026010
Cluster1	Soltu.DM.03G026020
Cluster1	Soltu.DM.03G026030
Cluster1	Soltu.DM.03G026370
Cluster1	Soltu.DM.03G026480
Cluster1	Soltu.DM.03G026860
Cluster1	Soltu.DM.03G026940
Cluster1	Soltu.DM.03G026970
Cluster1	Soltu.DM.03G027000
Cluster1	Soltu.DM.03G027010
Cluster1	Soltu.DM.03G027210
Cluster1	Soltu.DM.03G027250
Cluster1	Soltu.DM.03G027290
Cluster1	Soltu.DM.03G027300
Cluster1	Soltu.DM.03G027330
Cluster1	Soltu.DM.03G027340
Cluster1	Soltu.DM.03G027390
Cluster1	Soltu.DM.03G027450
Cluster1	Soltu.DM.03G027470
Cluster1	Soltu.DM.03G027500
Cluster1	Soltu.DM.03G027620
Cluster1	Soltu.DM.03G027630
Cluster1	Soltu.DM.03G027720
Cluster1	Soltu.DM.03G028160
Cluster1	Soltu.DM.03G028300
Cluster1	Soltu.DM.03G028350
Cluster1	Soltu.DM.03G028360
Cluster1	Soltu.DM.03G028630
Cluster1	Soltu.DM.03G028670
Cluster1	Soltu.DM.03G028960
Cluster1	Soltu.DM.03G029040
Cluster1	Soltu.DM.03G029050
Cluster1	Soltu.DM.03G029130
Cluster1	Soltu.DM.03G029220
Cluster1	Soltu.DM.03G029550
Cluster1	Soltu.DM.03G029570
Cluster1	Soltu.DM.03G029690
Cluster1	Soltu.DM.03G029710
Cluster1	Soltu.DM.03G029730
Cluster1	Soltu.DM.03G029840
Cluster1	Soltu.DM.03G029980
Cluster1	Soltu.DM.03G030050
Cluster1	Soltu.DM.03G030220
Cluster1	Soltu.DM.03G030480
Cluster1	Soltu.DM.03G030580
Cluster1	Soltu.DM.03G030590
Cluster1	Soltu.DM.03G030680
Cluster1	Soltu.DM.03G030700
Cluster1	Soltu.DM.03G030740
Cluster1	Soltu.DM.03G030750
Cluster1	Soltu.DM.03G030760
Cluster1	Soltu.DM.03G030990
Cluster1	Soltu.DM.03G031000
Cluster1	Soltu.DM.03G031320
Cluster1	Soltu.DM.03G031480
Cluster1	Soltu.DM.03G031540
Cluster1	Soltu.DM.03G031820
Cluster1	Soltu.DM.03G031870
Cluster1	Soltu.DM.03G032080
Cluster1	Soltu.DM.03G032090
Cluster1	Soltu.DM.03G032100
Cluster1	Soltu.DM.03G032120
Cluster1	Soltu.DM.03G032230
Cluster1	Soltu.DM.03G032350
Cluster1	Soltu.DM.03G032450
Cluster1	Soltu.DM.03G032510
Cluster1	Soltu.DM.03G032570
Cluster1	Soltu.DM.03G032590
Cluster1	Soltu.DM.03G032610
Cluster1	Soltu.DM.03G032620
Cluster1	Soltu.DM.03G032700
Cluster1	Soltu.DM.03G032960
Cluster1	Soltu.DM.03G032980
Cluster1	Soltu.DM.03G033270
Cluster1	Soltu.DM.03G033400
Cluster1	Soltu.DM.03G033670
Cluster1	Soltu.DM.03G033690
Cluster1	Soltu.DM.03G033730
Cluster1	Soltu.DM.03G033770
Cluster1	Soltu.DM.03G033800
Cluster1	Soltu.DM.03G033820
Cluster1	Soltu.DM.03G034110
Cluster1	Soltu.DM.03G034120
Cluster1	Soltu.DM.03G034150
Cluster1	Soltu.DM.03G034200
Cluster1	Soltu.DM.03G034230
Cluster1	Soltu.DM.03G034300
Cluster1	Soltu.DM.03G034380
Cluster1	Soltu.DM.03G034530
Cluster1	Soltu.DM.03G034540
Cluster1	Soltu.DM.03G034590
Cluster1	Soltu.DM.03G034600
Cluster1	Soltu.DM.03G034670
Cluster1	Soltu.DM.03G034770
Cluster1	Soltu.DM.03G034810
Cluster1	Soltu.DM.03G035030
Cluster1	Soltu.DM.03G035060
Cluster1	Soltu.DM.03G035070
Cluster1	Soltu.DM.03G035080
Cluster1	Soltu.DM.03G035150
Cluster1	Soltu.DM.03G035250
Cluster1	Soltu.DM.03G035260
Cluster1	Soltu.DM.03G035300
Cluster1	Soltu.DM.03G035440
Cluster1	Soltu.DM.03G035520
Cluster1	Soltu.DM.03G035530
Cluster1	Soltu.DM.03G035620
Cluster1	Soltu.DM.03G035710
Cluster1	Soltu.DM.03G035810
Cluster1	Soltu.DM.03G035830
Cluster1	Soltu.DM.03G035840
Cluster1	Soltu.DM.03G035890
Cluster1	Soltu.DM.03G035920
Cluster1	Soltu.DM.03G036090
Cluster1	Soltu.DM.03G036150
Cluster1	Soltu.DM.03G036160
Cluster1	Soltu.DM.03G036170
Cluster1	Soltu.DM.03G036190
Cluster1	Soltu.DM.03G036230
Cluster1	Soltu.DM.03G036320
Cluster1	Soltu.DM.03G036400
Cluster1	Soltu.DM.03G036560
Cluster1	Soltu.DM.03G036600
Cluster1	Soltu.DM.03G036620
Cluster1	Soltu.DM.03G036690
Cluster1	Soltu.DM.03G036730
Cluster1	Soltu.DM.03G036750
Cluster1	Soltu.DM.03G037040
Cluster1	Soltu.DM.03G037120
Cluster1	Soltu.DM.03G037180
Cluster1	Soltu.DM.03G037360
Cluster1	Soltu.DM.03G037380
Cluster1	Soltu.DM.03G037390
Cluster1	Soltu.DM.03G037470
Cluster1	Soltu.DM.03G037480
Cluster1	Soltu.DM.03G037540
Cluster1	Soltu.DM.03G037560
Cluster1	Soltu.DM.03G037600
Cluster1	Soltu.DM.04G000010
Cluster1	Soltu.DM.04G000050
Cluster1	Soltu.DM.04G000160
Cluster1	Soltu.DM.04G000290
Cluster1	Soltu.DM.04G000540
Cluster1	Soltu.DM.04G000560
Cluster1	Soltu.DM.04G000570
Cluster1	Soltu.DM.04G000670
Cluster1	Soltu.DM.04G000680
Cluster1	Soltu.DM.04G000940
Cluster1	Soltu.DM.04G001150
Cluster1	Soltu.DM.04G001160
Cluster1	Soltu.DM.04G001770
Cluster1	Soltu.DM.04G002070
Cluster1	Soltu.DM.04G002090
Cluster1	Soltu.DM.04G002100
Cluster1	Soltu.DM.04G002180
Cluster1	Soltu.DM.04G002250
Cluster1	Soltu.DM.04G002270
Cluster1	Soltu.DM.04G002330
Cluster1	Soltu.DM.04G002350
Cluster1	Soltu.DM.04G002550
Cluster1	Soltu.DM.04G002650
Cluster1	Soltu.DM.04G002720
Cluster1	Soltu.DM.04G002800
Cluster1	Soltu.DM.04G003120
Cluster1	Soltu.DM.04G003230
Cluster1	Soltu.DM.04G003270
Cluster1	Soltu.DM.04G003480
Cluster1	Soltu.DM.04G003720
Cluster1	Soltu.DM.04G003740
Cluster1	Soltu.DM.04G003760
Cluster1	Soltu.DM.04G004010
Cluster1	Soltu.DM.04G004450
Cluster1	Soltu.DM.04G004920
Cluster1	Soltu.DM.04G004930
Cluster1	Soltu.DM.04G005280
Cluster1	Soltu.DM.04G005300
Cluster1	Soltu.DM.04G005320
Cluster1	Soltu.DM.04G005330
Cluster1	Soltu.DM.04G005340
Cluster1	Soltu.DM.04G005400
Cluster1	Soltu.DM.04G005650
Cluster1	Soltu.DM.04G005710
Cluster1	Soltu.DM.04G005970
Cluster1	Soltu.DM.04G006590
Cluster1	Soltu.DM.04G006660
Cluster1	Soltu.DM.04G006710
Cluster1	Soltu.DM.04G006790
Cluster1	Soltu.DM.04G006860
Cluster1	Soltu.DM.04G007470
Cluster1	Soltu.DM.04G007690
Cluster1	Soltu.DM.04G007830
Cluster1	Soltu.DM.04G007840
Cluster1	Soltu.DM.04G007930
Cluster1	Soltu.DM.04G007950
Cluster1	Soltu.DM.04G007960
Cluster1	Soltu.DM.04G007990
Cluster1	Soltu.DM.04G008020
Cluster1	Soltu.DM.04G008350
Cluster1	Soltu.DM.04G008370
Cluster1	Soltu.DM.04G008730
Cluster1	Soltu.DM.04G008980
Cluster1	Soltu.DM.04G009110
Cluster1	Soltu.DM.04G009310
Cluster1	Soltu.DM.04G010190
Cluster1	Soltu.DM.04G010390
Cluster1	Soltu.DM.04G010610
Cluster1	Soltu.DM.04G010950
Cluster1	Soltu.DM.04G010960
Cluster1	Soltu.DM.04G011060
Cluster1	Soltu.DM.04G011070
Cluster1	Soltu.DM.04G011180
Cluster1	Soltu.DM.04G011240
Cluster1	Soltu.DM.04G011290
Cluster1	Soltu.DM.04G011310
Cluster1	Soltu.DM.04G011320
Cluster1	Soltu.DM.04G011370
Cluster1	Soltu.DM.04G011570
Cluster1	Soltu.DM.04G012130
Cluster1	Soltu.DM.04G012140
Cluster1	Soltu.DM.04G012270
Cluster1	Soltu.DM.04G012990
Cluster1	Soltu.DM.04G013790
Cluster1	Soltu.DM.04G014160
Cluster1	Soltu.DM.04G014720
Cluster1	Soltu.DM.04G014760
Cluster1	Soltu.DM.04G014830
Cluster1	Soltu.DM.04G014840
Cluster1	Soltu.DM.04G014860
Cluster1	Soltu.DM.04G014880
Cluster1	Soltu.DM.04G014900
Cluster1	Soltu.DM.04G015840
Cluster1	Soltu.DM.04G016280
Cluster1	Soltu.DM.04G017540
Cluster1	Soltu.DM.04G017960
Cluster1	Soltu.DM.04G018020
Cluster1	Soltu.DM.04G018220
Cluster1	Soltu.DM.04G018760
Cluster1	Soltu.DM.04G019260
Cluster1	Soltu.DM.04G019860
Cluster1	Soltu.DM.04G020350
Cluster1	Soltu.DM.04G020400
Cluster1	Soltu.DM.04G020510
Cluster1	Soltu.DM.04G020520
Cluster1	Soltu.DM.04G020590
Cluster1	Soltu.DM.04G020640
Cluster1	Soltu.DM.04G020660
Cluster1	Soltu.DM.04G020680
Cluster1	Soltu.DM.04G021120
Cluster1	Soltu.DM.04G021160
Cluster1	Soltu.DM.04G021500
Cluster1	Soltu.DM.04G021540
Cluster1	Soltu.DM.04G021650
Cluster1	Soltu.DM.04G021880
Cluster1	Soltu.DM.04G021930
Cluster1	Soltu.DM.04G022450
Cluster1	Soltu.DM.04G022530
Cluster1	Soltu.DM.04G022660
Cluster1	Soltu.DM.04G022710
Cluster1	Soltu.DM.04G023330
Cluster1	Soltu.DM.04G023390
Cluster1	Soltu.DM.04G023490
Cluster1	Soltu.DM.04G023590
Cluster1	Soltu.DM.04G024000
Cluster1	Soltu.DM.04G024370
Cluster1	Soltu.DM.04G024920
Cluster1	Soltu.DM.04G024930
Cluster1	Soltu.DM.04G025040
Cluster1	Soltu.DM.04G025190
Cluster1	Soltu.DM.04G025270
Cluster1	Soltu.DM.04G026010
Cluster1	Soltu.DM.04G026270
Cluster1	Soltu.DM.04G026330
Cluster1	Soltu.DM.04G026390
Cluster1	Soltu.DM.04G026510
Cluster1	Soltu.DM.04G026520
Cluster1	Soltu.DM.04G026570
Cluster1	Soltu.DM.04G027250
Cluster1	Soltu.DM.04G027260
Cluster1	Soltu.DM.04G027450
Cluster1	Soltu.DM.04G027470
Cluster1	Soltu.DM.04G027480
Cluster1	Soltu.DM.04G027530
Cluster1	Soltu.DM.04G027640
Cluster1	Soltu.DM.04G027770
Cluster1	Soltu.DM.04G027800
Cluster1	Soltu.DM.04G027920
Cluster1	Soltu.DM.04G027990
Cluster1	Soltu.DM.04G028090
Cluster1	Soltu.DM.04G028270
Cluster1	Soltu.DM.04G028320
Cluster1	Soltu.DM.04G028740
Cluster1	Soltu.DM.04G028750
Cluster1	Soltu.DM.04G028760
Cluster1	Soltu.DM.04G028770
Cluster1	Soltu.DM.04G028810
Cluster1	Soltu.DM.04G029010
Cluster1	Soltu.DM.04G029210
Cluster1	Soltu.DM.04G029220
Cluster1	Soltu.DM.04G029270
Cluster1	Soltu.DM.04G029290
Cluster1	Soltu.DM.04G029700
Cluster1	Soltu.DM.04G029770
Cluster1	Soltu.DM.04G029850
Cluster1	Soltu.DM.04G029880
Cluster1	Soltu.DM.04G030010
Cluster1	Soltu.DM.04G030020
Cluster1	Soltu.DM.04G030030
Cluster1	Soltu.DM.04G030040
Cluster1	Soltu.DM.04G030050
Cluster1	Soltu.DM.04G030060
Cluster1	Soltu.DM.04G030070
Cluster1	Soltu.DM.04G030100
Cluster1	Soltu.DM.04G030170
Cluster1	Soltu.DM.04G030230
Cluster1	Soltu.DM.04G030280
Cluster1	Soltu.DM.04G030290
Cluster1	Soltu.DM.04G030330
Cluster1	Soltu.DM.04G030380
Cluster1	Soltu.DM.04G030390
Cluster1	Soltu.DM.04G030490
Cluster1	Soltu.DM.04G030510
Cluster1	Soltu.DM.04G030530
Cluster1	Soltu.DM.04G031050
Cluster1	Soltu.DM.04G031200
Cluster1	Soltu.DM.04G031370
Cluster1	Soltu.DM.04G031380
Cluster1	Soltu.DM.04G031410
Cluster1	Soltu.DM.04G031470
Cluster1	Soltu.DM.04G031580
Cluster1	Soltu.DM.04G031630
Cluster1	Soltu.DM.04G031820
Cluster1	Soltu.DM.04G031890
Cluster1	Soltu.DM.04G031930
Cluster1	Soltu.DM.04G032030
Cluster1	Soltu.DM.04G032040
Cluster1	Soltu.DM.04G032170
Cluster1	Soltu.DM.04G032180
Cluster1	Soltu.DM.04G032220
Cluster1	Soltu.DM.04G032240
Cluster1	Soltu.DM.04G032340
Cluster1	Soltu.DM.04G032360
Cluster1	Soltu.DM.04G032370
Cluster1	Soltu.DM.04G032440
Cluster1	Soltu.DM.04G032540
Cluster1	Soltu.DM.04G032570
Cluster1	Soltu.DM.04G032730
Cluster1	Soltu.DM.04G032780
Cluster1	Soltu.DM.04G032840
Cluster1	Soltu.DM.04G032870
Cluster1	Soltu.DM.04G032990
Cluster1	Soltu.DM.04G033000
Cluster1	Soltu.DM.04G033030
Cluster1	Soltu.DM.04G033120
Cluster1	Soltu.DM.04G033280
Cluster1	Soltu.DM.04G033290
Cluster1	Soltu.DM.04G033310
Cluster1	Soltu.DM.04G033380
Cluster1	Soltu.DM.04G033410
Cluster1	Soltu.DM.04G033500
Cluster1	Soltu.DM.04G033640
Cluster1	Soltu.DM.04G033660
Cluster1	Soltu.DM.04G033970
Cluster1	Soltu.DM.04G034100
Cluster1	Soltu.DM.04G034170
Cluster1	Soltu.DM.04G034270
Cluster1	Soltu.DM.04G034380
Cluster1	Soltu.DM.04G034620
Cluster1	Soltu.DM.04G034670
Cluster1	Soltu.DM.04G034690
Cluster1	Soltu.DM.04G034770
Cluster1	Soltu.DM.04G034800
Cluster1	Soltu.DM.04G034830
Cluster1	Soltu.DM.04G034860
Cluster1	Soltu.DM.04G034960
Cluster1	Soltu.DM.04G035010
Cluster1	Soltu.DM.04G035230
Cluster1	Soltu.DM.04G035240
Cluster1	Soltu.DM.04G035290
Cluster1	Soltu.DM.04G035310
Cluster1	Soltu.DM.04G035320
Cluster1	Soltu.DM.04G035590
Cluster1	Soltu.DM.04G035650
Cluster1	Soltu.DM.04G035690
Cluster1	Soltu.DM.04G035790
Cluster1	Soltu.DM.04G035890
Cluster1	Soltu.DM.04G035920
Cluster1	Soltu.DM.04G036000
Cluster1	Soltu.DM.04G036350
Cluster1	Soltu.DM.04G036370
Cluster1	Soltu.DM.04G036650
Cluster1	Soltu.DM.04G036660
Cluster1	Soltu.DM.04G036670
Cluster1	Soltu.DM.04G036870
Cluster1	Soltu.DM.04G036960
Cluster1	Soltu.DM.04G037010
Cluster1	Soltu.DM.04G037080
Cluster1	Soltu.DM.04G037130
Cluster1	Soltu.DM.04G037160
Cluster1	Soltu.DM.04G037270
Cluster1	Soltu.DM.04G037340
Cluster1	Soltu.DM.04G037370
Cluster1	Soltu.DM.04G037380
Cluster1	Soltu.DM.04G037450
Cluster1	Soltu.DM.04G037590
Cluster1	Soltu.DM.04G037660
Cluster1	Soltu.DM.04G038120
Cluster1	Soltu.DM.04G038160
Cluster1	Soltu.DM.04G038210
Cluster1	Soltu.DM.04G038220
Cluster1	Soltu.DM.05G000010
Cluster1	Soltu.DM.05G000050
Cluster1	Soltu.DM.05G000090
Cluster1	Soltu.DM.05G000120
Cluster1	Soltu.DM.05G000240
Cluster1	Soltu.DM.05G000290
Cluster1	Soltu.DM.05G000360
Cluster1	Soltu.DM.05G000390
Cluster1	Soltu.DM.05G001250
Cluster1	Soltu.DM.05G001260
Cluster1	Soltu.DM.05G001520
Cluster1	Soltu.DM.05G001680
Cluster1	Soltu.DM.05G001700
Cluster1	Soltu.DM.05G001780
Cluster1	Soltu.DM.05G001790
Cluster1	Soltu.DM.05G001830
Cluster1	Soltu.DM.05G002190
Cluster1	Soltu.DM.05G002200
Cluster1	Soltu.DM.05G002580
Cluster1	Soltu.DM.05G002670
Cluster1	Soltu.DM.05G002750
Cluster1	Soltu.DM.05G002840
Cluster1	Soltu.DM.05G002870
Cluster1	Soltu.DM.05G003040
Cluster1	Soltu.DM.05G003270
Cluster1	Soltu.DM.05G003540
Cluster1	Soltu.DM.05G003560
Cluster1	Soltu.DM.05G004500
Cluster1	Soltu.DM.05G004540
Cluster1	Soltu.DM.05G004730
Cluster1	Soltu.DM.05G004740
Cluster1	Soltu.DM.05G004750
Cluster1	Soltu.DM.05G005000
Cluster1	Soltu.DM.05G005060
Cluster1	Soltu.DM.05G005070
Cluster1	Soltu.DM.05G005090
Cluster1	Soltu.DM.05G005130
Cluster1	Soltu.DM.05G005300
Cluster1	Soltu.DM.05G005310
Cluster1	Soltu.DM.05G005580
Cluster1	Soltu.DM.05G005600
Cluster1	Soltu.DM.05G005820
Cluster1	Soltu.DM.05G005840
Cluster1	Soltu.DM.05G005850
Cluster1	Soltu.DM.05G006040
Cluster1	Soltu.DM.05G006140
Cluster1	Soltu.DM.05G006150
Cluster1	Soltu.DM.05G006330
Cluster1	Soltu.DM.05G006340
Cluster1	Soltu.DM.05G006410
Cluster1	Soltu.DM.05G006650
Cluster1	Soltu.DM.05G006770
Cluster1	Soltu.DM.05G006780
Cluster1	Soltu.DM.05G006800
Cluster1	Soltu.DM.05G006900
Cluster1	Soltu.DM.05G006950
Cluster1	Soltu.DM.05G007110
Cluster1	Soltu.DM.05G007540
Cluster1	Soltu.DM.05G007620
Cluster1	Soltu.DM.05G008100
Cluster1	Soltu.DM.05G008440
Cluster1	Soltu.DM.05G008530
Cluster1	Soltu.DM.05G008550
Cluster1	Soltu.DM.05G008580
Cluster1	Soltu.DM.05G008690
Cluster1	Soltu.DM.05G008840
Cluster1	Soltu.DM.05G008930
Cluster1	Soltu.DM.05G009010
Cluster1	Soltu.DM.05G009060
Cluster1	Soltu.DM.05G009340
Cluster1	Soltu.DM.05G009360
Cluster1	Soltu.DM.05G009390
Cluster1	Soltu.DM.05G009650
Cluster1	Soltu.DM.05G009690
Cluster1	Soltu.DM.05G009810
Cluster1	Soltu.DM.05G009870
Cluster1	Soltu.DM.05G009920
Cluster1	Soltu.DM.05G009950
Cluster1	Soltu.DM.05G009960
Cluster1	Soltu.DM.05G009970
Cluster1	Soltu.DM.05G009990
Cluster1	Soltu.DM.05G010010
Cluster1	Soltu.DM.05G010040
Cluster1	Soltu.DM.05G010060
Cluster1	Soltu.DM.05G010190
Cluster1	Soltu.DM.05G010270
Cluster1	Soltu.DM.05G010290
Cluster1	Soltu.DM.05G010400
Cluster1	Soltu.DM.05G010470
Cluster1	Soltu.DM.05G010710
Cluster1	Soltu.DM.05G010720
Cluster1	Soltu.DM.05G010880
Cluster1	Soltu.DM.05G010890
Cluster1	Soltu.DM.05G011490
Cluster1	Soltu.DM.05G011700
Cluster1	Soltu.DM.05G011720
Cluster1	Soltu.DM.05G011880
Cluster1	Soltu.DM.05G011890
Cluster1	Soltu.DM.05G011990
Cluster1	Soltu.DM.05G012130
Cluster1	Soltu.DM.05G012150
Cluster1	Soltu.DM.05G012290
Cluster1	Soltu.DM.05G012480
Cluster1	Soltu.DM.05G012910
Cluster1	Soltu.DM.05G013130
Cluster1	Soltu.DM.05G013180
Cluster1	Soltu.DM.05G013200
Cluster1	Soltu.DM.05G013510
Cluster1	Soltu.DM.05G013540
Cluster1	Soltu.DM.05G013840
Cluster1	Soltu.DM.05G014170
Cluster1	Soltu.DM.05G014240
Cluster1	Soltu.DM.05G014560
Cluster1	Soltu.DM.05G014640
Cluster1	Soltu.DM.05G015210
Cluster1	Soltu.DM.05G015440
Cluster1	Soltu.DM.05G015790
Cluster1	Soltu.DM.05G015800
Cluster1	Soltu.DM.05G015870
Cluster1	Soltu.DM.05G016070
Cluster1	Soltu.DM.05G016500
Cluster1	Soltu.DM.05G016630
Cluster1	Soltu.DM.05G017300
Cluster1	Soltu.DM.05G017320
Cluster1	Soltu.DM.05G017380
Cluster1	Soltu.DM.05G017880
Cluster1	Soltu.DM.05G017900
Cluster1	Soltu.DM.05G017910
Cluster1	Soltu.DM.05G017930
Cluster1	Soltu.DM.05G018380
Cluster1	Soltu.DM.05G018890
Cluster1	Soltu.DM.05G018910
Cluster1	Soltu.DM.05G019010
Cluster1	Soltu.DM.05G019290
Cluster1	Soltu.DM.05G019420
Cluster1	Soltu.DM.05G019610
Cluster1	Soltu.DM.05G019620
Cluster1	Soltu.DM.05G019840
Cluster1	Soltu.DM.05G020710
Cluster1	Soltu.DM.05G020900
Cluster1	Soltu.DM.05G020920
Cluster1	Soltu.DM.05G020980
Cluster1	Soltu.DM.05G021100
Cluster1	Soltu.DM.05G021270
Cluster1	Soltu.DM.05G021350
Cluster1	Soltu.DM.05G021360
Cluster1	Soltu.DM.05G021610
Cluster1	Soltu.DM.05G022080
Cluster1	Soltu.DM.05G022340
Cluster1	Soltu.DM.05G022360
Cluster1	Soltu.DM.05G022380
Cluster1	Soltu.DM.05G022390
Cluster1	Soltu.DM.05G022450
Cluster1	Soltu.DM.05G022460
Cluster1	Soltu.DM.05G022550
Cluster1	Soltu.DM.05G022660
Cluster1	Soltu.DM.05G022720
Cluster1	Soltu.DM.05G023150
Cluster1	Soltu.DM.05G023280
Cluster1	Soltu.DM.05G023310
Cluster1	Soltu.DM.05G023330
Cluster1	Soltu.DM.05G023360
Cluster1	Soltu.DM.05G023550
Cluster1	Soltu.DM.05G023670
Cluster1	Soltu.DM.05G023730
Cluster1	Soltu.DM.05G024110
Cluster1	Soltu.DM.05G024230
Cluster1	Soltu.DM.05G024290
Cluster1	Soltu.DM.05G024550
Cluster1	Soltu.DM.05G024620
Cluster1	Soltu.DM.05G024860
Cluster1	Soltu.DM.05G024980
Cluster1	Soltu.DM.05G025220
Cluster1	Soltu.DM.05G025230
Cluster1	Soltu.DM.05G025310
Cluster1	Soltu.DM.05G025340
Cluster1	Soltu.DM.05G025350
Cluster1	Soltu.DM.05G025360
Cluster1	Soltu.DM.05G025440
Cluster1	Soltu.DM.05G025890
Cluster1	Soltu.DM.05G026140
Cluster1	Soltu.DM.05G026160
Cluster1	Soltu.DM.05G026210
Cluster1	Soltu.DM.05G026670
Cluster1	Soltu.DM.05G026780
Cluster1	Soltu.DM.05G026840
Cluster1	Soltu.DM.05G027200
Cluster1	Soltu.DM.05G027220
Cluster1	Soltu.DM.05G027350
Cluster1	Soltu.DM.06G000070
Cluster1	Soltu.DM.06G000110
Cluster1	Soltu.DM.06G000140
Cluster1	Soltu.DM.06G000270
Cluster1	Soltu.DM.06G000330
Cluster1	Soltu.DM.06G000370
Cluster1	Soltu.DM.06G000380
Cluster1	Soltu.DM.06G000780
Cluster1	Soltu.DM.06G001080
Cluster1	Soltu.DM.06G001380
Cluster1	Soltu.DM.06G001570
Cluster1	Soltu.DM.06G001620
Cluster1	Soltu.DM.06G001930
Cluster1	Soltu.DM.06G002800
Cluster1	Soltu.DM.06G002830
Cluster1	Soltu.DM.06G003060
Cluster1	Soltu.DM.06G003660
Cluster1	Soltu.DM.06G003960
Cluster1	Soltu.DM.06G003990
Cluster1	Soltu.DM.06G004140
Cluster1	Soltu.DM.06G004150
Cluster1	Soltu.DM.06G004190
Cluster1	Soltu.DM.06G004610
Cluster1	Soltu.DM.06G005020
Cluster1	Soltu.DM.06G005160
Cluster1	Soltu.DM.06G005340
Cluster1	Soltu.DM.06G005350
Cluster1	Soltu.DM.06G005820
Cluster1	Soltu.DM.06G006090
Cluster1	Soltu.DM.06G006350
Cluster1	Soltu.DM.06G006400
Cluster1	Soltu.DM.06G006790
Cluster1	Soltu.DM.06G007630
Cluster1	Soltu.DM.06G008350
Cluster1	Soltu.DM.06G008880
Cluster1	Soltu.DM.06G009150
Cluster1	Soltu.DM.06G009270
Cluster1	Soltu.DM.06G009550
Cluster1	Soltu.DM.06G009580
Cluster1	Soltu.DM.06G009640
Cluster1	Soltu.DM.06G010140
Cluster1	Soltu.DM.06G010410
Cluster1	Soltu.DM.06G010430
Cluster1	Soltu.DM.06G010590
Cluster1	Soltu.DM.06G010600
Cluster1	Soltu.DM.06G010770
Cluster1	Soltu.DM.06G010890
Cluster1	Soltu.DM.06G010920
Cluster1	Soltu.DM.06G011100
Cluster1	Soltu.DM.06G011220
Cluster1	Soltu.DM.06G011450
Cluster1	Soltu.DM.06G011620
Cluster1	Soltu.DM.06G011750
Cluster1	Soltu.DM.06G011760
Cluster1	Soltu.DM.06G011930
Cluster1	Soltu.DM.06G012200
Cluster1	Soltu.DM.06G012320
Cluster1	Soltu.DM.06G012330
Cluster1	Soltu.DM.06G012410
Cluster1	Soltu.DM.06G012470
Cluster1	Soltu.DM.06G012480
Cluster1	Soltu.DM.06G012620
Cluster1	Soltu.DM.06G013260
Cluster1	Soltu.DM.06G013280
Cluster1	Soltu.DM.06G013580
Cluster1	Soltu.DM.06G013590
Cluster1	Soltu.DM.06G013600
Cluster1	Soltu.DM.06G013730
Cluster1	Soltu.DM.06G013750
Cluster1	Soltu.DM.06G013780
Cluster1	Soltu.DM.06G014010
Cluster1	Soltu.DM.06G014100
Cluster1	Soltu.DM.06G014120
Cluster1	Soltu.DM.06G014150
Cluster1	Soltu.DM.06G014170
Cluster1	Soltu.DM.06G014360
Cluster1	Soltu.DM.06G014370
Cluster1	Soltu.DM.06G014600
Cluster1	Soltu.DM.06G014670
Cluster1	Soltu.DM.06G014700
Cluster1	Soltu.DM.06G014730
Cluster1	Soltu.DM.06G014980
Cluster1	Soltu.DM.06G015080
Cluster1	Soltu.DM.06G015100
Cluster1	Soltu.DM.06G015120
Cluster1	Soltu.DM.06G015160
Cluster1	Soltu.DM.06G015780
Cluster1	Soltu.DM.06G015830
Cluster1	Soltu.DM.06G016360
Cluster1	Soltu.DM.06G016370
Cluster1	Soltu.DM.06G016380
Cluster1	Soltu.DM.06G016620
Cluster1	Soltu.DM.06G017580
Cluster1	Soltu.DM.06G017600
Cluster1	Soltu.DM.06G017740
Cluster1	Soltu.DM.06G018580
Cluster1	Soltu.DM.06G018610
Cluster1	Soltu.DM.06G018620
Cluster1	Soltu.DM.06G018840
Cluster1	Soltu.DM.06G019240
Cluster1	Soltu.DM.06G019260
Cluster1	Soltu.DM.06G019280
Cluster1	Soltu.DM.06G019520
Cluster1	Soltu.DM.06G019530
Cluster1	Soltu.DM.06G019560
Cluster1	Soltu.DM.06G019850
Cluster1	Soltu.DM.06G019860
Cluster1	Soltu.DM.06G020010
Cluster1	Soltu.DM.06G020200
Cluster1	Soltu.DM.06G020260
Cluster1	Soltu.DM.06G020400
Cluster1	Soltu.DM.06G020460
Cluster1	Soltu.DM.06G020470
Cluster1	Soltu.DM.06G020480
Cluster1	Soltu.DM.06G020500
Cluster1	Soltu.DM.06G020620
Cluster1	Soltu.DM.06G020630
Cluster1	Soltu.DM.06G020650
Cluster1	Soltu.DM.06G020750
Cluster1	Soltu.DM.06G021800
Cluster1	Soltu.DM.06G021910
Cluster1	Soltu.DM.06G021920
Cluster1	Soltu.DM.06G021930
Cluster1	Soltu.DM.06G021980
Cluster1	Soltu.DM.06G022000
Cluster1	Soltu.DM.06G022040
Cluster1	Soltu.DM.06G022060
Cluster1	Soltu.DM.06G022080
Cluster1	Soltu.DM.06G022510
Cluster1	Soltu.DM.06G022600
Cluster1	Soltu.DM.06G022900
Cluster1	Soltu.DM.06G022910
Cluster1	Soltu.DM.06G023010
Cluster1	Soltu.DM.06G023030
Cluster1	Soltu.DM.06G023040
Cluster1	Soltu.DM.06G023140
Cluster1	Soltu.DM.06G023230
Cluster1	Soltu.DM.06G023420
Cluster1	Soltu.DM.06G023600
Cluster1	Soltu.DM.06G023680
Cluster1	Soltu.DM.06G023800
Cluster1	Soltu.DM.06G024230
Cluster1	Soltu.DM.06G024270
Cluster1	Soltu.DM.06G024280
Cluster1	Soltu.DM.06G024330
Cluster1	Soltu.DM.06G024430
Cluster1	Soltu.DM.06G024730
Cluster1	Soltu.DM.06G024830
Cluster1	Soltu.DM.06G024860
Cluster1	Soltu.DM.06G024870
Cluster1	Soltu.DM.06G024890
Cluster1	Soltu.DM.06G025080
Cluster1	Soltu.DM.06G025210
Cluster1	Soltu.DM.06G025490
Cluster1	Soltu.DM.06G025650
Cluster1	Soltu.DM.06G025730
Cluster1	Soltu.DM.06G025810
Cluster1	Soltu.DM.06G025870
Cluster1	Soltu.DM.06G026050
Cluster1	Soltu.DM.06G026140
Cluster1	Soltu.DM.06G026180
Cluster1	Soltu.DM.06G026190
Cluster1	Soltu.DM.06G026250
Cluster1	Soltu.DM.06G026270
Cluster1	Soltu.DM.06G026280
Cluster1	Soltu.DM.06G026310
Cluster1	Soltu.DM.06G026340
Cluster1	Soltu.DM.06G026350
Cluster1	Soltu.DM.06G026450
Cluster1	Soltu.DM.06G026760
Cluster1	Soltu.DM.06G026770
Cluster1	Soltu.DM.06G026880
Cluster1	Soltu.DM.06G027080
Cluster1	Soltu.DM.06G027100
Cluster1	Soltu.DM.06G027290
Cluster1	Soltu.DM.06G027580
Cluster1	Soltu.DM.06G027810
Cluster1	Soltu.DM.06G027980
Cluster1	Soltu.DM.06G028000
Cluster1	Soltu.DM.06G028240
Cluster1	Soltu.DM.06G028260
Cluster1	Soltu.DM.06G028330
Cluster1	Soltu.DM.06G028370
Cluster1	Soltu.DM.06G028600
Cluster1	Soltu.DM.06G028790
Cluster1	Soltu.DM.06G028880
Cluster1	Soltu.DM.06G029230
Cluster1	Soltu.DM.06G029240
Cluster1	Soltu.DM.06G029250
Cluster1	Soltu.DM.06G029260
Cluster1	Soltu.DM.06G029380
Cluster1	Soltu.DM.06G029430
Cluster1	Soltu.DM.06G029520
Cluster1	Soltu.DM.06G029630
Cluster1	Soltu.DM.06G029820
Cluster1	Soltu.DM.06G030320
Cluster1	Soltu.DM.06G030430
Cluster1	Soltu.DM.06G030450
Cluster1	Soltu.DM.06G030470
Cluster1	Soltu.DM.06G030480
Cluster1	Soltu.DM.06G030490
Cluster1	Soltu.DM.06G030510
Cluster1	Soltu.DM.06G030780
Cluster1	Soltu.DM.06G031010
Cluster1	Soltu.DM.06G031110
Cluster1	Soltu.DM.06G031140
Cluster1	Soltu.DM.06G031190
Cluster1	Soltu.DM.06G031200
Cluster1	Soltu.DM.06G031450
Cluster1	Soltu.DM.06G031460
Cluster1	Soltu.DM.06G031550
Cluster1	Soltu.DM.06G031600
Cluster1	Soltu.DM.06G031620
Cluster1	Soltu.DM.06G031910
Cluster1	Soltu.DM.06G032050
Cluster1	Soltu.DM.06G032310
Cluster1	Soltu.DM.06G032370
Cluster1	Soltu.DM.06G032490
Cluster1	Soltu.DM.06G032540
Cluster1	Soltu.DM.06G032730
Cluster1	Soltu.DM.06G032750
Cluster1	Soltu.DM.06G032860
Cluster1	Soltu.DM.06G032960
Cluster1	Soltu.DM.06G033340
Cluster1	Soltu.DM.06G033440
Cluster1	Soltu.DM.06G033470
Cluster1	Soltu.DM.06G033520
Cluster1	Soltu.DM.06G033590
Cluster1	Soltu.DM.06G033600
Cluster1	Soltu.DM.06G033640
Cluster1	Soltu.DM.06G033670
Cluster1	Soltu.DM.06G033690
Cluster1	Soltu.DM.06G033830
Cluster1	Soltu.DM.06G033860
Cluster1	Soltu.DM.06G034390
Cluster1	Soltu.DM.06G034480
Cluster1	Soltu.DM.07G000110
Cluster1	Soltu.DM.07G000120
Cluster1	Soltu.DM.07G000130
Cluster1	Soltu.DM.07G000160
Cluster1	Soltu.DM.07G000170
Cluster1	Soltu.DM.07G000180
Cluster1	Soltu.DM.07G000200
Cluster1	Soltu.DM.07G000280
Cluster1	Soltu.DM.07G000410
Cluster1	Soltu.DM.07G000460
Cluster1	Soltu.DM.07G000530
Cluster1	Soltu.DM.07G000870
Cluster1	Soltu.DM.07G000890
Cluster1	Soltu.DM.07G001080
Cluster1	Soltu.DM.07G001110
Cluster1	Soltu.DM.07G001250
Cluster1	Soltu.DM.07G001460
Cluster1	Soltu.DM.07G001550
Cluster1	Soltu.DM.07G001730
Cluster1	Soltu.DM.07G001920
Cluster1	Soltu.DM.07G002220
Cluster1	Soltu.DM.07G002250
Cluster1	Soltu.DM.07G002290
Cluster1	Soltu.DM.07G002310
Cluster1	Soltu.DM.07G002420
Cluster1	Soltu.DM.07G002540
Cluster1	Soltu.DM.07G002550
Cluster1	Soltu.DM.07G002650
Cluster1	Soltu.DM.07G002660
Cluster1	Soltu.DM.07G002800
Cluster1	Soltu.DM.07G002820
Cluster1	Soltu.DM.07G002930
Cluster1	Soltu.DM.07G002950
Cluster1	Soltu.DM.07G003010
Cluster1	Soltu.DM.07G003030
Cluster1	Soltu.DM.07G003300
Cluster1	Soltu.DM.07G003310
Cluster1	Soltu.DM.07G003330
Cluster1	Soltu.DM.07G003500
Cluster1	Soltu.DM.07G003530
Cluster1	Soltu.DM.07G003540
Cluster1	Soltu.DM.07G003550
Cluster1	Soltu.DM.07G003640
Cluster1	Soltu.DM.07G003670
Cluster1	Soltu.DM.07G003720
Cluster1	Soltu.DM.07G003940
Cluster1	Soltu.DM.07G004230
Cluster1	Soltu.DM.07G004240
Cluster1	Soltu.DM.07G004360
Cluster1	Soltu.DM.07G004700
Cluster1	Soltu.DM.07G004800
Cluster1	Soltu.DM.07G005240
Cluster1	Soltu.DM.07G005290
Cluster1	Soltu.DM.07G005320
Cluster1	Soltu.DM.07G005390
Cluster1	Soltu.DM.07G005700
Cluster1	Soltu.DM.07G006120
Cluster1	Soltu.DM.07G006480
Cluster1	Soltu.DM.07G007020
Cluster1	Soltu.DM.07G007310
Cluster1	Soltu.DM.07G007400
Cluster1	Soltu.DM.07G007510
Cluster1	Soltu.DM.07G007590
Cluster1	Soltu.DM.07G007860
Cluster1	Soltu.DM.07G008270
Cluster1	Soltu.DM.07G008320
Cluster1	Soltu.DM.07G008340
Cluster1	Soltu.DM.07G008560
Cluster1	Soltu.DM.07G008910
Cluster1	Soltu.DM.07G010030
Cluster1	Soltu.DM.07G010100
Cluster1	Soltu.DM.07G010560
Cluster1	Soltu.DM.07G010570
Cluster1	Soltu.DM.07G010840
Cluster1	Soltu.DM.07G011900
Cluster1	Soltu.DM.07G011940
Cluster1	Soltu.DM.07G012010
Cluster1	Soltu.DM.07G012070
Cluster1	Soltu.DM.07G012230
Cluster1	Soltu.DM.07G012250
Cluster1	Soltu.DM.07G012330
Cluster1	Soltu.DM.07G012440
Cluster1	Soltu.DM.07G012710
Cluster1	Soltu.DM.07G012750
Cluster1	Soltu.DM.07G012780
Cluster1	Soltu.DM.07G013190
Cluster1	Soltu.DM.07G013270
Cluster1	Soltu.DM.07G013370
Cluster1	Soltu.DM.07G013420
Cluster1	Soltu.DM.07G013650
Cluster1	Soltu.DM.07G013940
Cluster1	Soltu.DM.07G014240
Cluster1	Soltu.DM.07G014530
Cluster1	Soltu.DM.07G014660
Cluster1	Soltu.DM.07G014720
Cluster1	Soltu.DM.07G014900
Cluster1	Soltu.DM.07G015210
Cluster1	Soltu.DM.07G016100
Cluster1	Soltu.DM.07G016120
Cluster1	Soltu.DM.07G016130
Cluster1	Soltu.DM.07G016290
Cluster1	Soltu.DM.07G016460
Cluster1	Soltu.DM.07G016500
Cluster1	Soltu.DM.07G016780
Cluster1	Soltu.DM.07G017090
Cluster1	Soltu.DM.07G017180
Cluster1	Soltu.DM.07G017190
Cluster1	Soltu.DM.07G017200
Cluster1	Soltu.DM.07G017210
Cluster1	Soltu.DM.07G017220
Cluster1	Soltu.DM.07G017310
Cluster1	Soltu.DM.07G017330
Cluster1	Soltu.DM.07G017450
Cluster1	Soltu.DM.07G017470
Cluster1	Soltu.DM.07G017480
Cluster1	Soltu.DM.07G017500
Cluster1	Soltu.DM.07G017550
Cluster1	Soltu.DM.07G017560
Cluster1	Soltu.DM.07G017570
Cluster1	Soltu.DM.07G017790
Cluster1	Soltu.DM.07G017870
Cluster1	Soltu.DM.07G017900
Cluster1	Soltu.DM.07G017950
Cluster1	Soltu.DM.07G018020
Cluster1	Soltu.DM.07G018040
Cluster1	Soltu.DM.07G018050
Cluster1	Soltu.DM.07G018380
Cluster1	Soltu.DM.07G018580
Cluster1	Soltu.DM.07G019030
Cluster1	Soltu.DM.07G019040
Cluster1	Soltu.DM.07G019120
Cluster1	Soltu.DM.07G019130
Cluster1	Soltu.DM.07G019510
Cluster1	Soltu.DM.07G019530
Cluster1	Soltu.DM.07G019550
Cluster1	Soltu.DM.07G019560
Cluster1	Soltu.DM.07G019570
Cluster1	Soltu.DM.07G019580
Cluster1	Soltu.DM.07G019630
Cluster1	Soltu.DM.07G019840
Cluster1	Soltu.DM.07G020330
Cluster1	Soltu.DM.07G020380
Cluster1	Soltu.DM.07G020440
Cluster1	Soltu.DM.07G020670
Cluster1	Soltu.DM.07G020910
Cluster1	Soltu.DM.07G021430
Cluster1	Soltu.DM.07G021440
Cluster1	Soltu.DM.07G021480
Cluster1	Soltu.DM.07G021500
Cluster1	Soltu.DM.07G021600
Cluster1	Soltu.DM.07G021650
Cluster1	Soltu.DM.07G021660
Cluster1	Soltu.DM.07G021670
Cluster1	Soltu.DM.07G022000
Cluster1	Soltu.DM.07G022090
Cluster1	Soltu.DM.07G022330
Cluster1	Soltu.DM.07G022400
Cluster1	Soltu.DM.07G022410
Cluster1	Soltu.DM.07G022570
Cluster1	Soltu.DM.07G022660
Cluster1	Soltu.DM.07G022670
Cluster1	Soltu.DM.07G022700
[truncated: 22,754 more rows]
