# Supplementary material for: Transcriptome-metabolome integration reveals MYB/WRKY-RGA network and phenylalanine metabolism in potato late blight resistance
Source: Research Square preprint supplement (doi:10.21203/rs.3.rs-8142072/v1), 2025-12-04
Supplement: Supplementary file 6 [file a5e1755a9b2b6bd3f85c1121.xlsx]

## Sheet: Sheet1
Supplementary Table S5 KEGG enrichment results of genes in each cluster in the Mfuzz results
Cluster	ID	Description	GeneRatio	BgRatio	pvalue	p.adjust	qvalue	geneID	Count
cluster1	sot00940	Phenylpropanoid biosynthesis	54/570	327/6840	5.71188e-07	6.6829e-05	6.13275e-05	Soltu.DM.01G006500/Soltu.DM.01G019100/Soltu.DM.01G022860/Soltu.DM.01G044300/Soltu.DM.01G047230/Soltu.DM.01G047240/Soltu.DM.01G047250/Soltu.DM.01G047260/Soltu.DM.01G047840/Soltu.DM.02G013200/Soltu.DM.02G013290/Soltu.DM.02G016570/Soltu.DM.02G021970/Soltu.DM.02G028520/Soltu.DM.02G028530/Soltu.DM.02G028550/Soltu.DM.02G032570/Soltu.DM.02G034250/Soltu.DM.03G002490/Soltu.DM.03G002800/Soltu.DM.03G011790/…	54
cluster1	sot04016	MAPK signaling pathway - plant	43/570	251/6840	3.22513e-06	0.00018867	0.000173139	Soltu.DM.01G019360/Soltu.DM.01G034030/Soltu.DM.01G034180/Soltu.DM.01G034200/Soltu.DM.01G044190/Soltu.DM.01G044870/Soltu.DM.01G045910/Soltu.DM.01G045930/Soltu.DM.01G045950/Soltu.DM.01G046010/Soltu.DM.02G003500/Soltu.DM.02G022930/Soltu.DM.03G001460/Soltu.DM.04G008350/Soltu.DM.04G026270/Soltu.DM.04G026570/Soltu.DM.04G037660/Soltu.DM.05G014560/Soltu.DM.05G020900/Soltu.DM.05G022460/Soltu.DM.06G005160/…	43
cluster1	sot00592	alpha-Linolenic acid metabolism	16/570	80/6840	0.000767785	0.0220167	0.0202043	Soltu.DM.01G030870/Soltu.DM.02G032650/Soltu.DM.02G032680/Soltu.DM.03G037120/Soltu.DM.04G021650/Soltu.DM.04G034690/Soltu.DM.08G024630/Soltu.DM.09G017080/Soltu.DM.09G028490/Soltu.DM.09G031530/Soltu.DM.10G003860/Soltu.DM.10G022610/Soltu.DM.10G027610/Soltu.DM.10G028000/Soltu.DM.11G010900/Soltu.DM.11G013630	16
cluster1	sot00520	Amino sugar and nucleotide sugar metabolism	25/570	154/6840	0.000862247	0.0220167	0.0202043	Soltu.DM.01G021700/Soltu.DM.01G034400/Soltu.DM.02G022930/Soltu.DM.02G024120/Soltu.DM.02G031050/Soltu.DM.03G016430/Soltu.DM.03G027720/Soltu.DM.04G027770/Soltu.DM.07G000110/Soltu.DM.07G000120/Soltu.DM.07G000170/Soltu.DM.07G000200/Soltu.DM.08G027220/Soltu.DM.08G029290/Soltu.DM.10G017910/Soltu.DM.10G017970/Soltu.DM.10G017980/Soltu.DM.10G017990/Soltu.DM.10G018000/Soltu.DM.10G018020/Soltu.DM.10G018220/…	25
cluster1	sot04075	Plant hormone signal transduction	46/570	347/6840	0.000940885	0.0220167	0.0202043	Soltu.DM.01G044190/Soltu.DM.01G045910/Soltu.DM.01G045930/Soltu.DM.01G045950/Soltu.DM.01G046010/Soltu.DM.01G046770/Soltu.DM.01G046780/Soltu.DM.01G050580/Soltu.DM.01G050590/Soltu.DM.02G007770/Soltu.DM.02G028070/Soltu.DM.03G000450/Soltu.DM.03G021810/Soltu.DM.03G021820/Soltu.DM.03G035030/Soltu.DM.03G035810/Soltu.DM.04G022450/Soltu.DM.04G036350/Soltu.DM.04G036370/Soltu.DM.05G020900/Soltu.DM.05G022460/…	46
cluster1	sot00280	Valine, leucine and isoleucine degradation	17/570	92/6840	0.00135354	0.0230314	0.0211354	Soltu.DM.01G010580/Soltu.DM.01G021550/Soltu.DM.01G029360/Soltu.DM.01G047450/Soltu.DM.03G005260/Soltu.DM.05G008100/Soltu.DM.05G017300/Soltu.DM.05G027200/Soltu.DM.06G028880/Soltu.DM.07G010840/Soltu.DM.08G000110/Soltu.DM.08G024090/Soltu.DM.09G020140/Soltu.DM.09G028490/Soltu.DM.11G019140/Soltu.DM.11G022560/Soltu.DM.12G028860	17
cluster1	sot04626	Plant-pathogen interaction	38/570	277/6840	0.00137794	0.0230314	0.0211354	Soltu.DM.01G007760/Soltu.DM.01G019360/Soltu.DM.01G034200/Soltu.DM.01G044190/Soltu.DM.01G044870/Soltu.DM.01G045910/Soltu.DM.01G045930/Soltu.DM.01G045950/Soltu.DM.01G046010/Soltu.DM.02G003500/Soltu.DM.02G004770/Soltu.DM.02G007250/Soltu.DM.02G034080/Soltu.DM.03G000090/Soltu.DM.03G001460/Soltu.DM.03G006240/Soltu.DM.03G027300/Soltu.DM.04G008350/Soltu.DM.04G024920/Soltu.DM.04G024930/Soltu.DM.05G014560/…	38
cluster2	sot04626	Plant-pathogen interaction	23/250	277/6840	0.000181028	0.0168356	0.015435	Soltu.DM.01G000660/Soltu.DM.01G037850/Soltu.DM.02G032750/Soltu.DM.03G001360/Soltu.DM.03G001620/Soltu.DM.03G001690/Soltu.DM.03G003710/Soltu.DM.03G033980/Soltu.DM.06G006320/Soltu.DM.06G011830/Soltu.DM.06G024580/Soltu.DM.06G026400/Soltu.DM.07G005420/Soltu.DM.07G005840/Soltu.DM.08G000720/Soltu.DM.08G000800/Soltu.DM.08G000870/Soltu.DM.08G028440/Soltu.DM.09G007030/Soltu.DM.09G007060/Soltu.DM.11G003490/…	23
cluster2	sot00902	Monoterpenoid biosynthesis	6/250	33/6840	0.00108304	0.039541	0.0362515	Soltu.DM.02G019400/Soltu.DM.10G006810/Soltu.DM.11G001940/Soltu.DM.11G001970/Soltu.DM.11G002260/Soltu.DM.11G002650	6
cluster2	sot00591	Linoleic acid metabolism	6/250	34/6840	0.00127552	0.039541	0.0362515	Soltu.DM.01G038910/Soltu.DM.01G038930/Soltu.DM.05G011130/Soltu.DM.08G005440/Soltu.DM.08G005480/Soltu.DM.11G001520	6
cluster3	sot00195	Photosynthesis	51/539	81/6840	8.67109e-37	8.7578e-35	7.75834e-35	Soltu.DM.01G010320/Soltu.DM.01G010330/Soltu.DM.01G011570/Soltu.DM.01G013670/Soltu.DM.01G014640/Soltu.DM.01G014690/Soltu.DM.02G008740/Soltu.DM.02G011870/Soltu.DM.02G012460/Soltu.DM.02G019510/Soltu.DM.02G020140/Soltu.DM.02G023800/Soltu.DM.02G029790/Soltu.DM.03G000230/Soltu.DM.03G029080/Soltu.DM.03G035340/Soltu.DM.04G009790/Soltu.DM.04G009810/Soltu.DM.04G009830/Soltu.DM.04G009840/Soltu.DM.04G016890/…	51
cluster3	sot00196	Photosynthesis - antenna proteins	19/539	35/6840	9.81693e-13	4.95755e-11	4.39178e-11	Soltu.DM.01G044280/Soltu.DM.02G014000/Soltu.DM.02G014030/Soltu.DM.02G014050/Soltu.DM.03G000820/Soltu.DM.03G000830/Soltu.DM.03G000850/Soltu.DM.03G000860/Soltu.DM.03G000900/Soltu.DM.04G038180/Soltu.DM.05G026770/Soltu.DM.06G021700/Soltu.DM.07G009310/Soltu.DM.07G015870/Soltu.DM.07G024910/Soltu.DM.08G015890/Soltu.DM.09G000380/Soltu.DM.10G003340/Soltu.DM.12G026250	19
cluster3	sot00710	Carbon fixation in photosynthetic organisms	29/539	84/6840	2.31913e-12	7.80774e-11	6.9167e-11	Soltu.DM.01G036630/Soltu.DM.01G045790/Soltu.DM.01G050210/Soltu.DM.02G006160/Soltu.DM.02G007030/Soltu.DM.02G024280/Soltu.DM.02G025840/Soltu.DM.03G004480/Soltu.DM.03G029950/Soltu.DM.04G002540/Soltu.DM.04G005250/Soltu.DM.04G027060/Soltu.DM.04G037850/Soltu.DM.05G004580/Soltu.DM.05G009660/Soltu.DM.05G022620/Soltu.DM.06G027160/Soltu.DM.07G023810/Soltu.DM.07G027740/Soltu.DM.07G028590/Soltu.DM.08G021990/…	29
cluster3	sot00630	Glyoxylate and dicarboxylate metabolism	27/539	91/6840	6.89979e-10	1.7422e-08	1.54337e-08	Soltu.DM.01G019990/Soltu.DM.01G023770/Soltu.DM.01G045790/Soltu.DM.01G051180/Soltu.DM.02G007030/Soltu.DM.02G020350/Soltu.DM.02G022700/Soltu.DM.02G025840/Soltu.DM.02G026870/Soltu.DM.02G027810/Soltu.DM.03G004480/Soltu.DM.03G009790/Soltu.DM.03G024520/Soltu.DM.03G024530/Soltu.DM.03G035050/Soltu.DM.05G009660/Soltu.DM.05G023290/Soltu.DM.06G018030/Soltu.DM.06G018440/Soltu.DM.07G022590/Soltu.DM.07G023810/…	27
cluster3	sot00860	Porphyrin and chlorophyll metabolism	20/539	57/6840	4.60143e-09	9.29489e-08	8.23414e-08	Soltu.DM.01G022190/Soltu.DM.01G030350/Soltu.DM.02G033210/Soltu.DM.03G030100/Soltu.DM.03G032490/Soltu.DM.04G010810/Soltu.DM.04G031570/Soltu.DM.04G034230/Soltu.DM.05G013550/Soltu.DM.06G011840/Soltu.DM.06G015020/Soltu.DM.06G017400/Soltu.DM.07G019640/Soltu.DM.08G009280/Soltu.DM.09G000240/Soltu.DM.10G002270/Soltu.DM.10G002850/Soltu.DM.10G004660/Soltu.DM.11G006390/Soltu.DM.12G026560	20
cluster3	sot01200	Carbon metabolism	58/539	337/6840	6.08856e-09	1.02491e-07	9.07944e-08	Soltu.DM.01G019990/Soltu.DM.01G036630/Soltu.DM.01G037180/Soltu.DM.01G037220/Soltu.DM.01G045790/Soltu.DM.01G050210/Soltu.DM.01G051180/Soltu.DM.02G006160/Soltu.DM.02G007030/Soltu.DM.02G009690/Soltu.DM.02G020350/Soltu.DM.02G022700/Soltu.DM.02G024280/Soltu.DM.02G025840/Soltu.DM.02G026870/Soltu.DM.02G027810/Soltu.DM.03G004480/Soltu.DM.03G024520/Soltu.DM.03G024530/Soltu.DM.03G029950/Soltu.DM.03G035050/…	58
cluster3	sot00906	Carotenoid biosynthesis	17/539	50/6840	1.14725e-07	1.65532e-06	1.46641e-06	Soltu.DM.01G026470/Soltu.DM.01G037060/Soltu.DM.01G047740/Soltu.DM.02G028820/Soltu.DM.03G037550/Soltu.DM.04G012120/Soltu.DM.04G020200/Soltu.DM.04G020360/Soltu.DM.04G027720/Soltu.DM.06G013450/Soltu.DM.08G003250/Soltu.DM.08G020370/Soltu.DM.10G024570/Soltu.DM.10G027930/Soltu.DM.11G024440/Soltu.DM.12G002290/Soltu.DM.12G025930	17
cluster3	sot04141	Protein processing in endoplasmic reticulum	48/539	303/6840	1.70842e-06	2.15687e-05	1.91073e-05	Soltu.DM.01G041960/Soltu.DM.01G042380/Soltu.DM.02G008910/Soltu.DM.02G017730/Soltu.DM.02G020010/Soltu.DM.02G033660/Soltu.DM.03G021700/Soltu.DM.03G023440/Soltu.DM.03G027830/Soltu.DM.03G031860/Soltu.DM.03G037330/Soltu.DM.04G007430/Soltu.DM.04G008820/Soltu.DM.05G010580/Soltu.DM.06G001040/Soltu.DM.06G006550/Soltu.DM.06G013460/Soltu.DM.06G031410/Soltu.DM.06G031840/Soltu.DM.06G031850/Soltu.DM.06G031870/…	48
cluster3	sot00970	Aminoacyl-tRNA biosynthesis	17/539	66/6840	8.89442e-06	9.98151e-05	8.8424e-05	Soltu.DM.01G000910/Soltu.DM.01G030840/Soltu.DM.01G036050/Soltu.DM.02G020530/Soltu.DM.03G023850/Soltu.DM.03G033710/Soltu.DM.04G030180/Soltu.DM.04G030190/Soltu.DM.05G026950/Soltu.DM.07G004190/Soltu.DM.07G016140/Soltu.DM.09G027560/Soltu.DM.10G003480/Soltu.DM.12G004510/Soltu.DM.12G019950/Soltu.DM.12G019970/Soltu.DM.12G019990	17
cluster3	sot00030	Pentose phosphate pathway	15/539	64/6840	9.79357e-05	0.000989151	0.000876267	Soltu.DM.01G036630/Soltu.DM.01G050210/Soltu.DM.02G006160/Soltu.DM.02G024280/Soltu.DM.03G029950/Soltu.DM.04G002540/Soltu.DM.04G027060/Soltu.DM.05G004580/Soltu.DM.07G000470/Soltu.DM.07G015360/Soltu.DM.07G027740/Soltu.DM.09G001070/Soltu.DM.10G007540/Soltu.DM.10G010300/Soltu.DM.10G019980	15
cluster3	sot00920	Sulfur metabolism	9/539	41/6840	0.00390961	0.0358973	0.0318007	Soltu.DM.01G037180/Soltu.DM.01G037220/Soltu.DM.02G004130/Soltu.DM.02G007560/Soltu.DM.02G009550/Soltu.DM.02G018830/Soltu.DM.02G020240/Soltu.DM.03G000340/Soltu.DM.03G002670	9
cluster4	sot01200	Carbon metabolism	50/439	337/6840	1.24705e-08	1.39669e-06	1.0764e-06	Soltu.DM.01G000940/Soltu.DM.01G003320/Soltu.DM.01G015430/Soltu.DM.01G040700/Soltu.DM.01G045400/Soltu.DM.02G000510/Soltu.DM.02G007400/Soltu.DM.02G022830/Soltu.DM.02G032860/Soltu.DM.02G033740/Soltu.DM.02G033900/Soltu.DM.03G024400/Soltu.DM.03G035820/Soltu.DM.03G037410/Soltu.DM.04G000100/Soltu.DM.04G004650/Soltu.DM.04G007330/Soltu.DM.04G008590/Soltu.DM.04G030150/Soltu.DM.05G000980/Soltu.DM.05G002020/…	50
cluster4	sot00220	Arginine biosynthesis	14/439	44/6840	3.16891e-07	1.77459e-05	1.36764e-05	Soltu.DM.01G031810/Soltu.DM.01G048220/Soltu.DM.01G051980/Soltu.DM.02G027580/Soltu.DM.03G037410/Soltu.DM.04G035700/Soltu.DM.06G022180/Soltu.DM.07G008140/Soltu.DM.07G021010/Soltu.DM.08G022830/Soltu.DM.11G001770/Soltu.DM.11G011090/Soltu.DM.11G011110/Soltu.DM.12G005310	14
cluster4	sot04141	Protein processing in endoplasmic reticulum	40/439	303/6840	8.06811e-06	0.00030121	0.000232135	Soltu.DM.01G019950/Soltu.DM.01G024680/Soltu.DM.01G031200/Soltu.DM.01G040080/Soltu.DM.01G040140/Soltu.DM.01G049120/Soltu.DM.01G050260/Soltu.DM.02G004170/Soltu.DM.02G022120/Soltu.DM.02G029950/Soltu.DM.03G002900/Soltu.DM.03G022200/Soltu.DM.03G031100/Soltu.DM.03G032300/Soltu.DM.03G035420/Soltu.DM.03G035600/Soltu.DM.03G037720/Soltu.DM.04G001900/Soltu.DM.04G007420/Soltu.DM.04G018190/Soltu.DM.04G037890/…	40
cluster4	sot00190	Oxidative phosphorylation	26/439	162/6840	1.11097e-05	0.000311072	0.000239736	Soltu.DM.01G027540/Soltu.DM.01G028610/Soltu.DM.01G051310/Soltu.DM.02G011230/Soltu.DM.02G033740/Soltu.DM.02G033980/Soltu.DM.03G013790/Soltu.DM.03G020990/Soltu.DM.03G023310/Soltu.DM.03G037670/Soltu.DM.04G036210/Soltu.DM.05G004470/Soltu.DM.06G013530/Soltu.DM.06G023580/Soltu.DM.06G023640/Soltu.DM.06G031250/Soltu.DM.07G001380/Soltu.DM.07G006650/Soltu.DM.07G009790/Soltu.DM.08G004610/Soltu.DM.09G023240/…	26
cluster4	sot01230	Biosynthesis of amino acids	37/439	282/6840	2.05534e-05	0.000460396	0.000354817	Soltu.DM.01G000940/Soltu.DM.01G015430/Soltu.DM.01G031810/Soltu.DM.01G031840/Soltu.DM.01G040830/Soltu.DM.01G044610/Soltu.DM.01G048220/Soltu.DM.01G051980/Soltu.DM.02G000510/Soltu.DM.02G022830/Soltu.DM.02G027580/Soltu.DM.03G024400/Soltu.DM.03G037410/Soltu.DM.04G004650/Soltu.DM.04G006160/Soltu.DM.04G006830/Soltu.DM.04G008590/Soltu.DM.04G018630/Soltu.DM.04G030090/Soltu.DM.04G035700/Soltu.DM.05G004320/…	37
cluster4	sot00020	Citrate cycle (TCA cycle)	14/439	62/6840	2.75005e-05	0.000513342	0.000395621	Soltu.DM.01G000940/Soltu.DM.01G003320/Soltu.DM.02G000510/Soltu.DM.02G007400/Soltu.DM.02G033740/Soltu.DM.04G000100/Soltu.DM.04G007330/Soltu.DM.05G006940/Soltu.DM.06G034180/Soltu.DM.07G021850/Soltu.DM.07G026480/Soltu.DM.12G001690/Soltu.DM.12G001860/Soltu.DM.12G023250	14
cluster4	sot00330	Arginine and proline metabolism	15/439	80/6840	0.000140901	0.00225441	0.00173742	Soltu.DM.01G027080/Soltu.DM.01G031810/Soltu.DM.01G050790/Soltu.DM.02G023330/Soltu.DM.02G024470/Soltu.DM.03G003450/Soltu.DM.03G028090/Soltu.DM.03G037060/Soltu.DM.05G001840/Soltu.DM.06G015700/Soltu.DM.06G026110/Soltu.DM.07G008140/Soltu.DM.07G021010/Soltu.DM.10G016630/Soltu.DM.11G016700	15
cluster4	sot00710	Carbon fixation in photosynthetic organisms	15/439	84/6840	0.00024808	0.00343684	0.00264869	Soltu.DM.02G007400/Soltu.DM.03G024400/Soltu.DM.03G037410/Soltu.DM.05G004320/Soltu.DM.05G006110/Soltu.DM.05G019720/Soltu.DM.06G022180/Soltu.DM.07G008140/Soltu.DM.07G021010/Soltu.DM.07G023670/Soltu.DM.08G005300/Soltu.DM.09G004030/Soltu.DM.10G000600/Soltu.DM.10G002820/Soltu.DM.10G024820	15
cluster4	sot00620	Pyruvate metabolism	18/439	113/6840	0.000276175	0.00343684	0.00264869	Soltu.DM.01G015430/Soltu.DM.02G007400/Soltu.DM.02G024470/Soltu.DM.03G028090/Soltu.DM.03G037060/Soltu.DM.04G000100/Soltu.DM.04G004650/Soltu.DM.05G006940/Soltu.DM.05G019720/Soltu.DM.07G015120/Soltu.DM.07G023670/Soltu.DM.08G000530/Soltu.DM.08G005300/Soltu.DM.08G025160/Soltu.DM.10G002820/Soltu.DM.11G022410/Soltu.DM.12G001600/Soltu.DM.12G001860	18
cluster4	sot01210	2-Oxocarboxylic acid metabolism	15/439	87/6840	0.000369117	0.00406692	0.00313428	Soltu.DM.01G000940/Soltu.DM.01G048220/Soltu.DM.01G051980/Soltu.DM.02G000510/Soltu.DM.02G027580/Soltu.DM.03G037410/Soltu.DM.06G018090/Soltu.DM.06G022180/Soltu.DM.07G008140/Soltu.DM.07G021010/Soltu.DM.07G021850/Soltu.DM.08G022830/Soltu.DM.11G011090/Soltu.DM.11G011110/Soltu.DM.12G023250	15
cluster4	sot00410	beta-Alanine metabolism	16/439	97/6840	0.00039943	0.00406692	0.00313428	Soltu.DM.01G019390/Soltu.DM.01G027080/Soltu.DM.01G045400/Soltu.DM.02G004460/Soltu.DM.02G024470/Soltu.DM.03G019160/Soltu.DM.03G019550/Soltu.DM.03G028090/Soltu.DM.03G037060/Soltu.DM.05G009750/Soltu.DM.05G013360/Soltu.DM.08G024620/Soltu.DM.08G025780/Soltu.DM.10G003920/Soltu.DM.10G012990/Soltu.DM.10G019600	16
cluster4	sot00010	Glycolysis / Gluconeogenesis	22/439	158/6840	0.000438449	0.00409219	0.00315375	Soltu.DM.01G015430/Soltu.DM.02G024470/Soltu.DM.02G031910/Soltu.DM.03G024400/Soltu.DM.03G026930/Soltu.DM.03G028090/Soltu.DM.03G035820/Soltu.DM.03G037060/Soltu.DM.04G000100/Soltu.DM.04G004650/Soltu.DM.04G008590/Soltu.DM.04G030150/Soltu.DM.05G004320/Soltu.DM.05G006940/Soltu.DM.08G000530/Soltu.DM.08G025160/Soltu.DM.09G004030/Soltu.DM.09G018820/Soltu.DM.10G000600/Soltu.DM.10G024820/Soltu.DM.12G001600/…	22
cluster4	sot00071	Fatty acid degradation	13/439	76/6840	0.000969422	0.00775538	0.00597689	Soltu.DM.01G019390/Soltu.DM.01G021260/Soltu.DM.02G024470/Soltu.DM.03G028090/Soltu.DM.03G037060/Soltu.DM.04G030150/Soltu.DM.07G015120/Soltu.DM.08G024620/Soltu.DM.09G018820/Soltu.DM.10G003920/Soltu.DM.10G019600/Soltu.DM.12G001500/Soltu.DM.12G025050	13
cluster4	sot00640	Propanoate metabolism	13/439	76/6840	0.000969422	0.00775538	0.00597689	Soltu.DM.01G003320/Soltu.DM.01G019390/Soltu.DM.01G045400/Soltu.DM.02G004460/Soltu.DM.05G013360/Soltu.DM.06G034180/Soltu.DM.07G015120/Soltu.DM.08G000530/Soltu.DM.08G024620/Soltu.DM.08G025160/Soltu.DM.10G003920/Soltu.DM.10G019600/Soltu.DM.12G001860	13
cluster4	sot00510	N-Glycan biosynthesis	10/439	51/6840	0.00126195	0.00942256	0.00726174	Soltu.DM.01G049120/Soltu.DM.03G002900/Soltu.DM.03G037720/Soltu.DM.04G011610/Soltu.DM.04G018190/Soltu.DM.04G037890/Soltu.DM.05G019040/Soltu.DM.06G032800/Soltu.DM.09G023270/Soltu.DM.12G025250	10
cluster4	sot00520	Amino sugar and nucleotide sugar metabolism	20/439	154/6840	0.00189068	0.0132348	0.0101997	Soltu.DM.01G027120/Soltu.DM.01G028710/Soltu.DM.02G009480/Soltu.DM.03G029490/Soltu.DM.03G032520/Soltu.DM.03G035820/Soltu.DM.04G000320/Soltu.DM.05G001020/Soltu.DM.05G013440/Soltu.DM.05G025120/Soltu.DM.05G025270/Soltu.DM.06G028540/Soltu.DM.08G018670/Soltu.DM.08G025880/Soltu.DM.09G001710/Soltu.DM.09G023470/Soltu.DM.10G003140/Soltu.DM.10G017880/Soltu.DM.10G021340/Soltu.DM.10G026270	20
cluster4	sot00280	Valine, leucine and isoleucine degradation	14/439	92/6840	0.00202764	0.0133585	0.0102951	Soltu.DM.01G019390/Soltu.DM.01G021260/Soltu.DM.01G023900/Soltu.DM.01G045400/Soltu.DM.02G024470/Soltu.DM.03G028090/Soltu.DM.03G037060/Soltu.DM.04G022460/Soltu.DM.05G013360/Soltu.DM.07G015120/Soltu.DM.08G026820/Soltu.DM.10G019110/Soltu.DM.12G001860/Soltu.DM.12G007770	14
cluster4	sot00030	Pentose phosphate pathway	11/439	64/6840	0.00225321	0.01402	0.0108049	Soltu.DM.01G040700/Soltu.DM.02G033900/Soltu.DM.04G008590/Soltu.DM.05G000980/Soltu.DM.05G002020/Soltu.DM.05G004320/Soltu.DM.05G006110/Soltu.DM.06G014050/Soltu.DM.07G023190/Soltu.DM.09G004030/Soltu.DM.10G024820	11
cluster4	sot00514	Other types of O-glycan biosynthesis	5/439	16/6840	0.00257251	0.0151643	0.0116867	Soltu.DM.04G035050/Soltu.DM.05G024020/Soltu.DM.08G009930/Soltu.DM.08G020170/Soltu.DM.09G030590	5
cluster4	sot00072	Synthesis and degradation of ketone bodies	4/439	11/6840	0.0038441	0.021527	0.0165903	Soltu.DM.01G023900/Soltu.DM.07G015120/Soltu.DM.08G026820/Soltu.DM.12G007770	4
cluster4	sot00250	Alanine, aspartate and glutamate metabolism	10/439	60/6840	0.00443929	0.0236762	0.0182467	Soltu.DM.03G019160/Soltu.DM.03G028930/Soltu.DM.03G037410/Soltu.DM.04G022460/Soltu.DM.06G022180/Soltu.DM.06G026110/Soltu.DM.07G008140/Soltu.DM.07G021010/Soltu.DM.10G019110/Soltu.DM.11G001770	10
cluster4	sot04145	Phagosome	14/439	105/6840	0.0068951	0.0341881	0.026348	Soltu.DM.01G028610/Soltu.DM.01G040140/Soltu.DM.01G051310/Soltu.DM.02G011230/Soltu.DM.03G031100/Soltu.DM.03G032300/Soltu.DM.04G036210/Soltu.DM.05G020610/Soltu.DM.06G022230/Soltu.DM.06G023580/Soltu.DM.07G006380/Soltu.DM.08G004610/Soltu.DM.10G003040/Soltu.DM.12G008600	14
cluster4	sot00650	Butanoate metabolism	7/439	36/6840	0.00702078	0.0341881	0.026348	Soltu.DM.01G019390/Soltu.DM.01G023900/Soltu.DM.03G019160/Soltu.DM.07G015120/Soltu.DM.07G024160/Soltu.DM.08G026820/Soltu.DM.12G007770	7
cluster5	sot00196	Photosynthesis - antenna proteins	15/473	35/6840	2.84656e-09	3.07429e-07	2.78664e-07	Soltu.DM.01G044260/Soltu.DM.02G013810/Soltu.DM.02G014010/Soltu.DM.02G014020/Soltu.DM.02G014040/Soltu.DM.03G000840/Soltu.DM.03G000870/Soltu.DM.03G004830/Soltu.DM.03G030020/Soltu.DM.05G026750/Soltu.DM.06G025820/Soltu.DM.10G001380/Soltu.DM.12G023640/Soltu.DM.12G028930/Soltu.DM.12G029100	15
cluster5	sot00500	Starch and sucrose metabolism	33/473	185/6840	3.22884e-07	1.5914e-05	1.4425e-05	Soltu.DM.01G006300/Soltu.DM.01G008310/Soltu.DM.01G024440/Soltu.DM.01G036170/Soltu.DM.01G050190/Soltu.DM.02G009320/Soltu.DM.02G014060/Soltu.DM.02G020260/Soltu.DM.03G033470/Soltu.DM.04G021620/Soltu.DM.05G000570/Soltu.DM.05G009320/Soltu.DM.05G024440/Soltu.DM.07G013620/Soltu.DM.07G013630/Soltu.DM.07G018100/Soltu.DM.07G018130/Soltu.DM.07G022290/Soltu.DM.07G023280/Soltu.DM.07G024580/Soltu.DM.07G024630/…	33
cluster5	sot04712	Circadian rhythm - plant	17/473	61/6840	4.42056e-07	1.5914e-05	1.4425e-05	Soltu.DM.01G019510/Soltu.DM.03G021500/Soltu.DM.04G018960/Soltu.DM.04G018970/Soltu.DM.05G023390/Soltu.DM.05G023610/Soltu.DM.08G011730/Soltu.DM.08G028730/Soltu.DM.09G028560/Soltu.DM.10G000040/Soltu.DM.10G000080/Soltu.DM.10G000090/Soltu.DM.11G001010/Soltu.DM.11G004040/Soltu.DM.11G023720/Soltu.DM.12G007510/Soltu.DM.12G023350	17
cluster5	sot00040	Pentose and glucuronate interconversions	25/473	146/6840	1.86448e-05	0.00050341	0.000456307	Soltu.DM.01G021380/Soltu.DM.01G021390/Soltu.DM.01G021400/Soltu.DM.01G025480/Soltu.DM.02G009950/Soltu.DM.02G009960/Soltu.DM.03G008540/Soltu.DM.03G008580/Soltu.DM.03G030570/Soltu.DM.03G037420/Soltu.DM.04G031740/Soltu.DM.05G010370/Soltu.DM.05G024440/Soltu.DM.06G023750/Soltu.DM.06G035180/Soltu.DM.07G006420/Soltu.DM.07G025610/Soltu.DM.07G025620/Soltu.DM.07G025630/Soltu.DM.09G007270/Soltu.DM.11G001030/…	25
cluster6	sot03010	Ribosome	173/601	370/6840	1.61131e-90	1.7241e-88	1.49258e-88	Soltu.DM.01G001690/Soltu.DM.01G003600/Soltu.DM.01G003610/Soltu.DM.01G003930/Soltu.DM.01G006010/Soltu.DM.01G006830/Soltu.DM.01G006950/Soltu.DM.01G009110/Soltu.DM.01G009130/Soltu.DM.01G011910/Soltu.DM.01G017660/Soltu.DM.01G025380/Soltu.DM.01G025780/Soltu.DM.01G030050/Soltu.DM.01G031870/Soltu.DM.01G035790/Soltu.DM.01G037000/Soltu.DM.01G039380/Soltu.DM.01G039550/Soltu.DM.01G042450/Soltu.DM.01G042720/…	173
cluster6	sot01230	Biosynthesis of amino acids	53/601	282/6840	5.41681e-08	2.898e-06	2.50884e-06	Soltu.DM.01G000360/Soltu.DM.01G006220/Soltu.DM.01G038030/Soltu.DM.01G049670/Soltu.DM.01G049770/Soltu.DM.01G050700/Soltu.DM.01G051910/Soltu.DM.02G011510/Soltu.DM.02G015040/Soltu.DM.02G023550/Soltu.DM.02G027250/Soltu.DM.03G000790/Soltu.DM.03G005810/Soltu.DM.03G023100/Soltu.DM.03G025300/Soltu.DM.03G025640/Soltu.DM.03G036720/Soltu.DM.03G037400/Soltu.DM.04G002610/Soltu.DM.04G008860/Soltu.DM.04G030930/…	53
cluster6	sot00300	Lysine biosynthesis	6/601	11/6840	0.000141179	0.00503538	0.00435921	Soltu.DM.01G000360/Soltu.DM.01G049670/Soltu.DM.06G028630/Soltu.DM.09G007440/Soltu.DM.10G025270/Soltu.DM.11G015780	6
cluster6	sot00230	Purine metabolism	23/601	122/6840	0.000329686	0.00774065	0.00670121	Soltu.DM.01G030520/Soltu.DM.01G042370/Soltu.DM.02G025380/Soltu.DM.03G000100/Soltu.DM.03G016410/Soltu.DM.03G016420/Soltu.DM.03G023100/Soltu.DM.03G024360/Soltu.DM.04G015010/Soltu.DM.04G019010/Soltu.DM.04G024830/Soltu.DM.06G020210/Soltu.DM.07G001760/Soltu.DM.07G015450/Soltu.DM.07G015460/Soltu.DM.08G020020/Soltu.DM.08G029260/Soltu.DM.09G025440/Soltu.DM.09G028430/Soltu.DM.09G028440/Soltu.DM.10G020980/…	23
cluster6	sot03013	RNA transport	35/601	220/6840	0.000361713	0.00774065	0.00670121	Soltu.DM.01G024550/Soltu.DM.01G031300/Soltu.DM.02G013860/Soltu.DM.02G017540/Soltu.DM.03G000970/Soltu.DM.03G010960/Soltu.DM.03G014320/Soltu.DM.03G015720/Soltu.DM.03G035140/Soltu.DM.03G035570/Soltu.DM.04G011340/Soltu.DM.04G011400/Soltu.DM.05G019280/Soltu.DM.05G022710/Soltu.DM.06G005560/Soltu.DM.06G005570/Soltu.DM.06G005580/Soltu.DM.06G005620/Soltu.DM.06G005680/Soltu.DM.06G014810/Soltu.DM.06G019960/…	35
cluster6	sot04122	Sulfur relay system	5/601	11/6840	0.00151932	0.0270945	0.0234561	Soltu.DM.02G018470/Soltu.DM.02G027160/Soltu.DM.06G029000/Soltu.DM.07G028560/Soltu.DM.10G027220	5
cluster6	sot00780	Biotin metabolism	7/601	22/6840	0.00206081	0.0315009	0.0272709	Soltu.DM.01G002010/Soltu.DM.01G044290/Soltu.DM.06G027060/Soltu.DM.06G028800/Soltu.DM.07G002130/Soltu.DM.08G006610/Soltu.DM.10G029250	7
cluster6	sot00670	One carbon pool by folate	7/601	24/6840	0.00358228	0.047913	0.0414791	Soltu.DM.01G001830/Soltu.DM.01G049660/Soltu.DM.04G027370/Soltu.DM.04G031490/Soltu.DM.08G013650/Soltu.DM.08G020020/Soltu.DM.12G004430	7
cluster8	sot04144	Endocytosis	40/475	252/6840	5.15482e-07	5.61875e-05	5.15482e-05	Soltu.DM.01G039740/Soltu.DM.01G042120/Soltu.DM.02G003090/Soltu.DM.02G005480/Soltu.DM.02G015360/Soltu.DM.02G020880/Soltu.DM.02G023520/Soltu.DM.03G003540/Soltu.DM.03G033760/Soltu.DM.04G002470/Soltu.DM.04G025920/Soltu.DM.05G006990/Soltu.DM.05G014160/Soltu.DM.05G024460/Soltu.DM.06G001550/Soltu.DM.06G030020/Soltu.DM.06G030220/Soltu.DM.07G009810/Soltu.DM.07G026680/Soltu.DM.08G014050/Soltu.DM.09G002610/…	40
cluster8	sot04130	SNARE interactions in vesicular transport	13/475	45/6840	6.90499e-06	0.000376322	0.000345249	Soltu.DM.01G039890/Soltu.DM.02G012390/Soltu.DM.03G004090/Soltu.DM.04G027390/Soltu.DM.04G030520/Soltu.DM.05G000130/Soltu.DM.07G015740/Soltu.DM.07G017890/Soltu.DM.07G019740/Soltu.DM.08G016900/Soltu.DM.08G016970/Soltu.DM.10G025780/Soltu.DM.12G005380	13
