# Supplementary material for: Transcriptome-metabolome integration reveals MYB/WRKY-RGA network and phenylalanine metabolism in potato late blight resistance
Source: Research Square preprint supplement (doi:10.21203/rs.3.rs-8142072/v1), 2025-12-04
Supplement: Supplementary file 7 [file f0871f72083b42c357f5b787.xlsx]

## Sheet: Sheet1
Supplementary Table S1 Summary of RNA-seq data for each sample
Sample	num_seqs	sum_len	Mapping Rate
DY2_0_1	29515257	4418343383	0.8615
DY2_0_2	36180710	5410977982	0.8482
DY2_0_3	31234400	4670190107	0.732
DY2_24_1	25729031	3850346962	0.8361
DY2_24_2	27790757	4158061446	0.8858
DY2_24_3	34763135	5201068075	0.9099
DY2_48_1	30318127	4536501643	0.7056
DY2_48_2	27843180	4166504225	0.6893
DY2_48_3	23757070	3557664227	0.6653
DY2_96_1	31932288	4778635637	0.6568
DY2_96_2	26812783	4016694716	0.6329
DY2_96_3	31385271	4699281427	0.6976
FW_0_1	27016977	4044658667	0.9907
FW_0_2	25509735	3818063473	0.9895
FW_0_3	26587428	3978753573	0.9891
FW_24_1	31307010	4680601858	0.992
FW_24_2	27097103	4052927162	0.9887
FW_24_3	23513374	3517784681	0.98
FW_48_1	23032213	3445266112	0.9863
FW_48_2	22123397	3310676228	0.9849
FW_48_3	23166193	3465107051	0.9712
FW_96_1	25180979	3768464097	0.5815
FW_96_2	21933239	3282674370	0.9594
FW_96_3	22289618	3336790709	0.9142
